# Supplementary material for: The RXFP3 receptor is functionally associated with cellular responses to oxidative stress and DNA damage
Source: publisher site journal article supplement (doi:10.18632/aging.102528), 2019-12-03
Supplement: Supplementary file [file aging-v11i23-102528-supplementary-material-SD2.pdf]

**Table S1: Proteins selectively affected by the RXFP3 constellation.** In an unbiased manner we discovered the proteomic ‘constellation’ perturbation response to ascending expression levels of RXFP3 expression (0.5, 1, 2, 5, 10µg of cDNA expressed). Protein extracts were investigated as a multiplex using quantitative proteomics through iTRAQ labelling with each RXFP3 expression level compared ratiometrically to the proteomic response effects to empty vector ectopic expression. The ratios were then normalized using a Log<sub>2</sub> transformation, allowing us to identify the significantly up- and downregulated proteins.

| 0.5µg        |                  | 1µg          |                  | 2µg         |                  | 5µg                |                  | 10µg        |                  |
|--------------|------------------|--------------|------------------|-------------|------------------|--------------------|------------------|-------------|------------------|
| Gene Symbol  | Log <sub>2</sub> | Gene Symbol  | Log <sub>2</sub> | Gene Symbol | Log <sub>2</sub> | Gene Symbol        | Log <sub>2</sub> | Gene Symbol | Log <sub>2</sub> |
| AASDHPPT     | 0.294177644      | AASDHPPT     | 0.325364834      | ACLY        | -0.292542289     | ACTC1              | 0.271539975      | ABLIM1      | -0.332220572     |
| ABCF1        | -0.238729249     | ACADM        | 0.25560635       | ACOT7       | -0.34518901      | AGTRAP             | 0.296490926      | ACTA2       | -0.194868466     |
| ABLIM1       | -0.295446062     | ACAT1        | 0.335100621      | ACTC1       | 0.743016546      | AHCYL1             | 0.558913446      | ACY1        | 0.286055465      |
| ACOX1        | 0.352519881      | ACOT7        | -0.220086212     | AHCYL1      | 0.561512025      | ALB                | 0.37685384       | AHCYL1      | 0.293053616      |
| ACTC1        | 0.344455414      | ACTC1        | 0.303334806      | AIF1L       | -0.257611393     | ALDH5A1            | 0.297748322      | AHSA1       | -0.297855957     |
| AHCYL1       | 0.445385857      | AFF4         | -0.289851897     | AK6         | 0.217915408      | ANP32A             | 0.18341314       | AIF1L       | 0.207420555      |
| AIDA         | 0.286140339      | AHSA1        | 0.30836933       | ALDH5A1     | 0.24464642       | AP3B1              | -0.303101928     | AK6         | 0.279852669      |
| AIF1L        | -0.241909298     | AKR1B1       | 0.381214273      | ANKRD11     | -0.474910075     | ARHGEF18           | 0.194974413      | AK6         | 0.279852669      |
| ALG9         | 0.676016115      | ALDH5A1      | 0.389317218      | ANP32A      | -0.370269523     | ARL8B              | -0.260314503     | ALCAM       | 0.30834821       |
| ANKRD11      | -0.277508735     | ALG9         | 0.461573364      | AP2S1       | -0.338298764     | ASMTL              | -0.285562062     | ALG1        | -0.288540758     |
| ANKZF1       | 0.461782475      | ANKRD11      | -0.27255319      | AP3B1       | -0.31080733      | ASPSR1             | 0.219918851      | ANKRD11     | -0.544017002     |
| AP3B1        | -0.266769456     | APRT         | 0.270950252      | ARL14EP     | -0.360886717     | ATL3               | -0.323081679     | ANP32A      | -0.295605932     |
| AP3D1        | 0.236183718      | ARHGEF2      | 0.262897667      | ATPIF1      | 0.272809073      | ATOX1              | 0.172625738      | AP3B1       | -0.316018475     |
| ARHGAP11A    | -0.244503482     | ARL14EP      | -0.253013246     | ATXN2       | -0.319331327     | ATPIF1             | 0.179550436      | ARHGEF18    | 0.323345208      |
| ARHGEF18     | 0.331523071      | ASMTL        | -0.290995803     | B4GAT1      | -0.242105958     | ATXN10             | -0.258671403     | ASMTL       | -0.213930426     |
| ASMTL        | -0.246149736     | ATOX1        | 0.305780778      | BANF1       | 0.418023533      | ATXN2              | -0.527003055     | ATL3        | -0.298298994     |
| ATP5C1       | 0.281798429      | ATP5A1       | 0.427904167      | BCLAF1      | 0.248102454      | BANF1              | 0.481931315      | ATPIF1      | 0.296369478      |
| ATP5G3       | 0.313705542      | ATP5B        | 0.353870651      | BIRC5       | 0.269041449      | BUB1B              | -0.32397814      | BANF1       | 0.281928005      |
| ATP5H        | 0.231590348      | ATP5C1       | 0.318823125      | BRIX1       | -0.37599491      | C15orf38-<br>AP3S2 | 0.18224626       | BIRC5       | 0.315412626      |
| ATP5J2-PTCD1 | 0.267766929      | ATP5D        | 0.486532741      | BUB1B       | -0.536689395     | C4orf32            | -0.31813144      | BRIX1       | -0.226328127     |
| ATPIF1       | 0.380469739      | ATP5F1       | 0.264529972      | C3orf17     | 0.26894941       | CA3                | 0.755350473      | BUB1B       | -0.302505258     |
| ATXN10       | 0.233277691      | ATP5G3       | 0.290018208      | C4orf27     | -0.314680018     | CADM4              | 0.27705221       | BZW2        | -0.320733202     |
| ATXN2        | -0.347991086     | ATP5J2-PTCD1 | 0.317527757      | CA3         | 0.484425101      | CALM2              | 0.16197064       | C19orf53    | 0.353942375      |
| BPHL         | 0.239156379      | ATP5O        | 0.279135144      | CADM4       | 0.24725512       | CAPN2              | -0.261307045     | CA3         | 0.320322102      |
| C12orf75     | -0.26276642      | ATPIF1       | 0.571191271      | CAND1       | -0.289280338     | CAPNS1             | -0.280158025     | CAPNS1      | -0.372370845     |
| C1orf174     | -0.296784531     | ATXN10       | 0.28656706       | CAPN2       | -0.399885598     | CARHSP1            | 0.228804686      | CCDC9       | -0.256711568     |
| C4orf32      | -0.275806353     | ATXN2        | -0.287773094     | CAPNS1      | -0.262976931     | CCDC9              | -0.428989344     | CCNB2       | 0.43402735       |
| CA3          | 0.230159127      | BANF1        | -0.274326516     | CAPRN1      | -0.278219555     | CCK                | 0.266538434      | CDC73       | -0.487217952     |
| CALD1        | -0.296450134     | BUB1B        | -0.317152923     | CASC3       | -0.375490378     | CD9                | -0.276226967     | CDCA2       | -0.689431775     |

|         |              |          |              |          |              |          |              |         |              |
|---------|--------------|----------|--------------|----------|--------------|----------|--------------|---------|--------------|
| CALR    | 0.303753439  | C1QBP    | 0.409888308  | CBX1     | 0.383572052  | CDC73    | -0.629365293 | CENPV   | -0.239963147 |
| CALR    | 0.303753439  | CALD1    | 0.264472481  | CCDC9    | -0.578875534 | CDCA2    | -0.397730738 | CEP55   | 0.335023026  |
| CAPRIN1 | -0.264199716 | CALR     | 0.395967777  | CCSMST1  | -0.320174516 | CDK9     | -0.323685731 | CHD4    | -0.207524868 |
| CASC3   | -0.282913504 | CALU     | 0.243698799  | CDC73    | -0.579476554 | CDKN2AIP | -0.26468516  | CHMP1B  | 0.316760088  |
| CBS     | 0.235942     | CAPRIN1  | -0.306362449 | CDCA2    | -0.511550591 | CENPL    | -0.260478511 | CHMP2A  | 0.332582381  |
| CBX1    | 0.36885386   | CARHSP1  | 0.239417475  | CDCA3    | -0.257580737 | CENPV    | -0.366501814 | CHMP3   | 0.195991044  |
| CCDC9   | -0.388787162 | CASC3    | -0.383487457 | CDK9     | -0.304091678 | CEP55    | 0.295130228  | CNBP    | -0.351551    |
| CCNK    | -0.237592104 | CBS      | 0.291650494  | CDKN2AIP | 0.238110339  | CFL1     | 0.167814159  | COX14   | -0.329007055 |
| CDCA2   | -0.572116462 | CBX1     | 0.508390076  | CENPV    | -0.383792415 | CGN      | -0.308861258 | COX5A   | -0.348554912 |
| CDCA3   | -0.261997204 | CBX3     | 0.233103937  | CEP55    | 0.272959887  | CHCHD2   | 0.307058273  | COX6B1  | 0.364165967  |
| CENPV   | -0.225732366 | CCDC86   | -0.264969312 | CHD4     | -0.33937399  | CHD4     | -0.344665129 | CPNE1   | -0.29041289  |
| CEP131  | -0.262749403 | CCDC9    | -0.245948622 | CHMP2A   | 0.243896053  | CHMP2B   | -0.265388936 | CRYGD   | -0.203053378 |
| CGN     | -0.239029904 | CCNYL1   | 0.351811888  | CHMP2B   | -0.236806789 | CLN6     | 0.277907188  | CTSV    | 0.288762911  |
| CHCHD2  | 0.329967647  | CDCA2    | -0.46083529  | CLTC     | -0.290597455 | CNOT10   | -0.335306466 | DCP1B   | 0.222271291  |
| CHD3    | -0.242526248 | CDKN2AIP | -0.443149178 | COPB1    | -0.34121033  | COPZ1    | 0.26549606   | DCTD    | -0.289756164 |
| CLASP1  | 0.2767584    | CGN      | -0.293039742 | COQ6     | -0.343958495 | COQ6     | -0.318255202 | DDOST   | -0.251846942 |
| COX6B1  | 0.458417583  | CHMP2A   | 0.277702375  | COX5A    | -0.358928386 | COX5A    | -0.3032919   | DDT     | -0.261879173 |
| CRKL    | 0.239327479  | CHTOP    | 0.240936101  | COX6B1   | 0.188392706  | CRYGD    | -0.316191917 | DDX20   | -0.272358731 |
| CSNK1E  | -0.235936687 | CNBP     | 0.26664066   | CSRP2    | -0.289933808 | CTSV     | -0.445650241 | DERL1   | 0.289706186  |
| CTSV    | -0.271203329 | CNBP     | 0.26664066   | CTBP2    | -0.348798869 | CTTN     | -0.2663929   | DFFA    | -0.294341045 |
| DCD     | -0.374078821 | COX6B1   | 0.418721482  | DBNL     | -0.237204185 | DCD      | -0.300457641 | DIABLO  | 0.339601057  |
| DCTD    | -0.2296447   | CS       | 0.245635151  | DCTN4    | -0.289320074 | DCTD     | -0.279388727 | DPY30   | 0.391422375  |
| DDX19A  | 0.388126862  | CTBP2    | -0.224893341 | DDB1     | -0.301785644 | DDB1     | -0.276528287 | DSG1    | 0.449467007  |
| EIF4E   | -0.26289304  | CTSV     | -0.385866974 | DDT      | -0.27081301  | DDOST    | -0.277366119 | EEA1    | 0.188921055  |
| EMC6    | -0.23421476  | CUL4A    | -0.240577425 | DDX19A   | 0.446185275  | DDX19A   | 0.548467894  | EEF2    | -0.195089207 |
| FMR1    | -0.255940172 | CXXC1    | -0.278607791 | DERL1    | 0.242086827  | DHX57    | -0.255072238 | EIF3G   | -0.344445116 |
| FOXK2   | -0.228125007 | DCTD     | -0.263876698 | DHRS4    | -0.268271193 | DHX9     | -0.257144797 | EIF3L   | -0.309263192 |
| FTSJ3   | -0.597216129 | DDB1     | -0.237353595 | DHX15    | -0.298659061 | DSG1     | 0.330684414  | ENAH    | -0.434365204 |
| FXR1    | -0.257151169 | DDRGR1   | 0.309620788  | DHX57    | -0.287704667 | EIF1AX   | 0.175679571  | EPC1    | 0.353386897  |
| G3BP1   | -0.324607388 | DDT      | 0.267851991  | DHX9     | -0.287806677 | EIF3C    | -0.328265683 | EPN1    | -0.343263538 |
| G3BP2   | -0.443212682 | DDX19A   | 0.43404105   | DNM1L    | -0.30137597  | EIF3G    | -0.303679795 | ESD     | -0.352285626 |
| GABARAP | 0.337986989  | DDX6     | -0.266779733 | DYNC1H1  | -0.305430525 | EIF3L    | -0.290165289 | ESRRA   | 0.325267477  |
| GNA11   | 0.239166625  | DERL1    | 0.37281578   | EEF2     | -0.332343321 | EIF4E    | -0.26778028  | FAM107B | 0.190093556  |
| GNB4    | -0.273055798 | DHX37    | -0.226898727 | EHD1     | -0.301038526 | EIF4H    | -0.288571798 | FAM208B | -0.318468293 |
| GPATCH4 | -0.242402923 | DLD      | 0.430238535  | EIF3G    | -0.236291435 | ENAH     | -0.523609312 | FAM76A  | 0.293884184  |
| GPBP1   | 0.316796     | DLD      | 0.430238535  | EIF3L    | -0.308463073 | EPN1     | -0.476698301 | FDPS    | -0.291130113 |
| GPS1    | -0.284378992 | DSG1     | 0.426800505  | EIF4E    | -0.373691748 | EPN2     | -0.517168956 | FKBP15  | 0.209263078  |
| GTF2A2  | -0.211736949 | EEF2     | -0.22551217  | EIF4H    | -0.296376124 | ESD      | -0.362075255 | FLG2    | 0.337704811  |
| GYG1    | 0.433178399  | ELP2     | -0.271719205 | EIF5B    | -0.321863616 | FAM103A1 | 0.220299086  | FTSJ3   | -0.617704717 |
| H2AFZ   | 0.362155736  | EML4     | -0.220614257 | ELP2     | -0.312629542 | FAU      | 0.216384855  | FTSJ3   | -0.617704717 |
| HBA1    | -0.33977776  | ENY2     | 0.270679714  | ENAH     | -0.376196558 | FKBP7    | 0.615105832  | FUNDC2  | 0.312458338  |

|           |              |           |              |           |              |          |              |            |              |
|-----------|--------------|-----------|--------------|-----------|--------------|----------|--------------|------------|--------------|
| HGS       | 0.496436792  | EXOC4     | 0.265737055  | ESD       | -0.248403758 | FTSJ3    | -0.611563656 | GANAB      | -0.373088929 |
| HIST1H1B  | 0.65287147   | G3BP1     | -0.297178916 | FAM64A    | -0.282979229 | G3BP2    | -0.302499676 | GAR1       | 0.335758509  |
| HIST1H1D  | 1.695376646  | G3BP2     | -0.511404915 | FLOT2     | 0.302428518  | GALNT1   | 0.259033937  | GCFC2      | -0.233711923 |
| HIST1H2BA | 0.985021672  | GABARAP   | 0.257092904  | FMR1      | -0.269059309 | GALNT7   | -0.349768784 | GIN53      | -0.199388725 |
| HIST1H3A  | 1.296878006  | GATAD2A   | -0.285028511 | FTSJ3     | -0.596293715 | GCN1L1   | -0.319788    | GIT2       | 0.31935434   |
| HSD17B11  | 0.328687887  | GCN1L1    | -0.271468672 | G3BP2     | -0.395895915 | GMPS     | -0.264398526 | GMPS       | -0.190171848 |
| HSPA6     | 0.306894912  | GDE1      | -0.264369467 | GALNT7    | -0.323612264 | GNA11    | 0.277022844  | GNB2L1     | -0.228360994 |
| IKBIP     | -0.232878983 | GDI1      | 0.266618846  | GAPVD1    | -0.351619395 | GNL1     | -0.275215968 | GNL1       | -0.437841584 |
| INPP5K    | -0.261369812 | GMPS      | -0.233022649 | GCFC2     | -0.303105131 | GOLIM4   | -0.414749648 | GNL2       | -0.193102383 |
| INTS10    | -0.235283693 | GNA11     | 0.32473566   | GCN1L1    | -0.310150916 | GPALPP1  | 0.188590515  | GORASP2    | -0.316855189 |
| IST1      | 0.248809927  | GOLIM4    | 0.284156787  | GDE1      | -0.277850603 | GPBP1    | 0.18040124   | GPALPP1    | 0.254378711  |
| KAT5      | 0.296410549  | GPALPP1   | -0.285202752 | GGA2      | -0.34557823  | GRB10    | -0.250578343 | GSPT1      | -0.354765906 |
| KIN       | -0.223379574 | GRB10     | -0.319535209 | GIT2      | 0.19671156   | GSTO1    | -0.310612796 | GTPBP3     | -0.295240749 |
| KRT1      | -0.227011698 | GRPEL1    | 0.367547231  | GMPS      | -0.352708682 | H3F3A    | -0.289726298 | H1F0       | 0.402194778  |
| KRT10     | -0.332392279 | GTF3C2    | -0.226898727 | GNB2L1    | -0.353988796 | HACD3    | -0.270408769 | H1FX       | 0.386885714  |
| KRT2      | -0.314826862 | GYG1      | 0.381484859  | GNL1      | -0.279620782 | HADHB    | 0.174725733  | H2AFX      | 0.404632594  |
| KRT2      | -0.27831157  | H2AFY     | 0.343643482  | GOLIM4    | -0.438297209 | HBA1     | 0.366690792  | H2AFZ      | 0.433160354  |
| KRT9      | -0.212483973 | H2AFZ     | 0.772739503  | GORASP2   | -0.382812138 | HBB      | 0.589252257  | H3F3A      | -0.35625838  |
| LAMTOR2   | 0.303209351  | H3F3A     | -0.305293771 | GPALPP1   | -0.261938523 | HDCC2    | 0.162352969  | HARS       | -0.307486908 |
| LDB1      | 0.331143433  | HINT1     | 0.263183319  | GPBP1     | 0.228004349  | HDGFRP3  | 0.29422599   | HBB        | 0.861101917  |
| LIG4      | -0.268060206 | HIST1H1B  | 0.719495803  | GPS1      | -0.235118279 | HEATR3   | -0.271892174 | HDGFRP3    | 0.336514044  |
| LRRC1     | 0.373920795  | HIST1H1E  | 0.391808731  | GSTO1     | -0.264279496 | HGS      | 0.214586707  | HEATR3     | -0.188131875 |
| LSM12     | -0.277368045 | HIST1H2BA | 0.725680343  | H3F3A     | -0.343005918 | HGS      | 0.214586707  | HEXIM1     | 0.223836251  |
| LYAR      | -0.249959647 | HIST1H2BJ | 0.370357936  | HACD3     | -0.306234528 | HINT1    | -0.325213863 | HGS        | 0.224229136  |
| MAG1      | -0.306430634 | HIST1H2BL | 0.47860332   | HADHB     | 0.232032248  | HIST1H1C | 0.2508332    | HIST1H1C   | 0.380380473  |
| MAGI3     | -0.255519998 | HIST1H3A  | 0.40598354   | HAGH      | -0.263844491 | HIST1H1D | 0.665861176  | HIST1H1D   | 0.734135217  |
| MEPCE     | 0.66262566   | HIST2H2AB | 0.59814944   | HARS      | -0.2675812   | HIST1H3A | 0.217401531  | HIST1H1E   | 0.710057979  |
| METAP2    | -0.265478657 | HIST3H2BB | 0.520173478  | HBB       | 0.381890114  | HK1      | -0.261938898 | HIST1H2AB  | 0.363465557  |
| MGAT2     | -0.250821894 | HK1       | -0.223991811 | HEATR3    | -0.334638998 | HM13     | -0.266744039 | HIST1H2BK  | 0.452290288  |
| MIF       | 0.426783883  | HMGA1     | 0.298404214  | HGS       | 0.338163344  | HMGB1    | 0.200608955  | HIST1H3A   | 0.60745177   |
| MPP7      | -0.259065956 | HMG2N     | 0.29489128   | HIST1H1C  | 0.353483835  | HMGB2    | 0.167922719  | HIST1H4A   | -0.277273704 |
| MRPL28    | 0.260104406  | HMG2N5    | 0.27606369   | HIST1H1D  | 1.04834744   | HNRNPD   | 0.270000704  | HIST2H2AB  | 0.358533007  |
| MRPS17    | 0.296374466  | HNRNPA2B1 | 0.238005971  | HIST1H3A  | 0.513162211  | HNRNPM   | -0.250298289 | HIST2H2AC  | 0.649704717  |
| MT-ATP6   | 0.320491414  | HNRNPC    | 0.237173163  | HIST1H4A  | -0.385897884 | HSPE1    | 0.166213591  | HIST2H3PS2 | 0.312141124  |
| MT-ATP8   | 0.243017244  | HNRNPDL   | 0.263204306  | HIST2H2AC | 0.387184449  | HUWE1    | -0.449659965 | HIST3H2BB  | 0.210243836  |
| MTMR1     | -0.621246409 | HPRT1     | 0.321677766  | HK1       | -0.361732958 | INA      | 0.318944783  | HM13       | -0.221316316 |
| NBN       | -0.27380469  | HSD17B10  | 0.317771694  | HLA-C     | 0.291162711  | INPP5K   | -0.319484305 | HMGA1      | 0.345414976  |
| NCKAP1    | 0.362999721  | HSD17B12  | 0.277894772  | HN1L      | -0.282857874 | INTS6    | 0.475437723  | HMGA2      | 0.521071709  |
| NDUFA4    | 0.348403454  | HSPA9     | 0.273997563  | HNRNPA1L2 | 0.26204341   | IRF2BP1  | -0.272459007 | HMGB2      | 0.353506823  |
| NEDD4     | -0.264900045 | HSPD1     | 0.441124661  | HNRNPC    | 0.235023281  | ISCA1    | -0.26762552  | HMGN1      | 0.472286199  |
| NEK7      | -0.356300459 | HSPE1     | 0.290345746  | HSD17B11  | 0.253036318  | ISCA2    | 0.182178241  | HMGN2      | 0.423436644  |

|          |              |          |              |           |              |          |              |           |              |
|----------|--------------|----------|--------------|-----------|--------------|----------|--------------|-----------|--------------|
| NFXL1    | 0.45266145   | HUWE1    | 0.28127957   | HSPE1     | 0.249074142  | IST1     | 0.333981423  | HMG3      | 0.43004497   |
| NOLC1    | 0.291768502  | IDH3A    | 0.247929581  | HSPH1     | -0.291779478 | JAGN1    | -0.264693431 | HMG4      | 0.378835564  |
| NOLC1    | -0.252577233 | INTS4    | -0.274289571 | HZGJ      | -0.323722907 | JMJD6    | -0.292029837 | HN1L      | -0.406048196 |
| NPC1     | 0.822075641  | IPO4     | 0.316817663  | IARS      | -0.350401699 | KAT5     | 0.349668339  | HNRNPC    | 0.370567093  |
| NRDE2    | 0.710485678  | IRF2BP1  | 0.265710806  | ILKAP     | -0.292374717 | KCMF1    | 0.175737339  | HNRNPD    | -0.20995832  |
| NTPCR    | 0.376307366  | IRF2BP1  | -0.303579979 | INA       | 0.36297199   | KIAA1211 | 0.263236731  | HNRNPM    | -0.241581154 |
| OGFOD3   | -0.438018407 | ISCA1    | -0.27346846  | INTS6     | 0.357710933  | KIF2C    | 0.260991804  | HSPE1     | 0.213669644  |
| OPA3     | 0.363978484  | ISG20L2  | 0.258644927  | IPO4      | -0.300362092 | KIN      | -0.341478433 | HUWE1     | -0.471365495 |
| ORC1     | -0.233126486 | ITPK1    | -0.451631266 | ISCA1     | -0.338659784 | KPNA2    | -0.316688919 | IDE       | -0.311814383 |
| PAGR1    | -0.699972463 | KIAA0101 | -0.405707371 | IST1      | 0.291846673  | KPRP     | 0.258826853  | INA       | 0.289905853  |
| PALLD    | -0.299893602 | KPNA2    | -0.253508369 | ITPK1     | 0.239839426  | KRT10    | -0.337016947 | INTS10    | -0.290810933 |
| PAPD5    | -0.251213884 | KRT10    | -0.505846927 | JMJD6     | -0.434028495 | KRT2     | -0.27051424  | INTS6     | 0.399092741  |
| PCCA     | 0.270951963  | KRT2     | -0.571130788 | JMJD6     | -0.434028495 | LAMTOR3  | -0.272541025 | ISCA1     | -0.631264704 |
| PDE7B    | 0.732153179  | LBR      | 0.304225494  | KAT5      | 0.301983271  | LARP4    | -0.267602059 | ITPK1     | 0.251086859  |
| PEX16    | -0.542415816 | LDB1     | 0.277862711  | KCMF1     | 0.247177504  | LIG4     | -0.291278377 | JADE3     | -0.340068403 |
| PFKFB2   | -0.34331902  | LMNB1    | 0.307486462  | KIAA0101  | -0.262658237 | LSM7     | 0.179194973  | JMJD6     | -0.213418266 |
| PFKL     | 0.36261375   | LRRC1    | 0.375761296  | KIAA0415  | -0.288156297 | LYRM2    | 0.333898972  | KAT5      | 0.585683559  |
| PFKP     | -0.933801233 | LRRC59   | -0.259663836 | KIN       | -0.340457074 | MANBAL   | -0.277196252 | KCMF1     | 0.242644502  |
| PGM1     | 0.253764465  | LSM7     | 0.230221912  | KNSTRN    | 0.264876589  | MAPRE2   | 0.196463537  | KIAA0415  | -0.196783706 |
| POLR1E   | -0.298391118 | LYAR     | -0.295894807 | KPNA2     | -0.327704235 | MARCKS   | 0.203311961  | KIF18B    | -0.777383072 |
| POLR2G   | -0.274414203 | MAGI3    | -0.288195999 | KRT10     | -0.436654749 | MARCKSL1 | 0.166862138  | KIN       | -0.265423885 |
| POLR2G   | -0.274414203 | MAPRE2   | 0.235494712  | KRT2      | -0.499771989 | MAZ      | 0.274551869  | KPNA2     | -0.243902071 |
| POLR2K   | -0.334293116 | MDH2     | 0.565411432  | LAMP2     | -0.256908694 | MB       | 0.268792804  | KRT10     | -0.200021903 |
| POP1     | -0.480293841 | MED4     | -0.364741794 | LAMTOR3   | -0.246558826 | MCFD2    | -0.361677197 | KRT10     | -0.200021903 |
| POTEKP   | 0.722163395  | MEPCE    | 0.556926861  | LDB1      | 0.269764507  | MCM7     | -0.271698507 | KRT2      | -0.194565943 |
| PPP1R14B | 0.260681259  | METAP2   | -0.381440352 | LIG4      | -0.260407541 | MED15    | -0.302379316 | LIG1      | 0.220874669  |
| PPP2CB   | -0.229162592 | MIF      | 0.624630213  | LYRM2     | 0.358050221  | MEPCE    | -0.281876657 | LYPLA1    | 0.327415774  |
| PPP6R3   | 0.44182277   | MMACHC   | -0.350892115 | MAGI1     | -0.255653543 | MMACHC   | -0.416485789 | MAGI1     | -0.292138509 |
| PRKAR2B  | -0.214305901 | MORF4L1  | -0.235430435 | MAP1LC3B2 | -0.368250626 | MPP7     | -0.296750329 | MAP1LC3B2 | 0.295726177  |
| PRKCSH   | 0.345806011  | MRPS2    | 0.242235041  | MAP4K4    | 0.269742061  | MPST     | -0.325213863 | MARCKSL1  | 0.213659916  |
| PRR14L   | -0.430807924 | MRPS24   | -0.261560602 | MAPRE2    | 0.202478987  | MRPL23   | 0.260659529  | MED8      | -0.204140564 |
| PRSS1    | 0.230798917  | MT-ATP6  | 0.299122441  | MARCKSL1  | 0.218360817  | MTMR1    | -0.730178296 | MEPCE     | 0.631385217  |
| RAB18    | 0.590458164  | MT-ATP8  | 0.316346883  | MCFD2     | -0.340889608 | MYDGF    | 0.162060855  | MIS12     | 0.295540552  |
| RAB35    | -0.483292704 | MT-CO3   | -0.281546649 | MCM7      | -0.316313468 | MYL12A   | -0.283133344 | MMACHC    | -0.386293538 |
| RDH14    | -0.255595774 | MTMR1    | -1.030854449 | MED22     | -0.280330071 | NARS     | -0.301769883 | MMS22L    | -0.315419354 |
| RHOT2    | 0.47823089   | MYDGF    | 0.237432046  | MED4      | -0.525194529 | NCL      | 0.182428199  | MPST      | -0.380907602 |
| RNF40    | -0.229769076 | NAA25    | -0.227490125 | MEPCE     | 0.446444427  | NDUFA8   | 0.287186726  | MPV17     | -0.489894452 |
| RPLP1    | 0.371943536  | NDUFA4   | 0.398376823  | METAP2    | -0.268181013 | NDUFS6   | 0.259114059  | MRPL23    | 0.326726691  |
| RRBP1    | 0.405231334  | NEDD4    | -0.265369479 | MIS12     | 0.234832725  | NEDD4    | -0.509910996 | MRPS14    | -0.292369223 |
| RRBP1    | -0.289908274 | NEK7     | -0.327239935 | MLXIP     | -0.243381617 | NEFM     | 0.341532439  | MRPS2     | -0.193985137 |
| SCYL1    | -0.263308476 | NENF     | 0.321936007  | MMACHC    | -0.319117108 | NEK7     | -0.359347582 | MTERF3    | 0.310976667  |

|         |              |        |              |          |              |          |              |         |              |
|---------|--------------|--------|--------------|----------|--------------|----------|--------------|---------|--------------|
| SDHC    | 0.696110174  | NHP2L1 | 0.264724468  | MRPL23   | 0.301988834  | NENF     | 0.202472442  | MTMR1   | -0.389546598 |
| SEC24B  | -0.24934264  | NKX2-5 | -0.305289084 | MRPS21   | 0.235002644  | NFXL1    | 0.370200403  | NAA40   | 0.320773086  |
| SLC12A4 | -0.258730479 | NOLC1  | 0.449328652  | MT-ATP6  | 0.313816042  | NIPSNAP1 | 0.278662723  | NARS    | -0.248130711 |
| SLC25A3 | 0.243782123  | NOLC1  | -0.325320639 | MT-CO3   | -0.315968396 | NR2C2AP  | 0.201274431  | NCL     | 0.336121314  |
| SLC25A4 | 0.228159549  | NPC1   | 1.284694053  | MTMR1    | -0.613499941 | NUCKS1   | 0.219333411  | NDUFB1  | -0.393995449 |
| SLC25A5 | 0.268138883  | NPM1   | 0.232101459  | MXRA7    | -0.241142093 | NUF2     | -0.280767133 | NECAP1  | 0.229762954  |
| SLC25A6 | 0.311686561  | NSMCE1 | 0.286740891  | MYH9     | -0.311075568 | NUP98    | -0.275598991 | NEK7    | -0.241449854 |
| SLC39A7 | 0.248649064  | NT5C2  | -0.262866807 | MYL12A   | -0.289801979 | ORC1     | -0.30252977  | NEK9    | 0.20279355   |
| SMARCA2 | 0.251712116  | NTPCR  | 0.312498578  | NAE1     | -0.326780154 | OSBP     | -0.411835469 | NENF    | 0.250400574  |
| SNTB2   | 0.233325473  | NUCB1  | -0.343680533 | NARS     | -0.491178533 | PAFAH1B1 | -0.265298454 | NFKBIB  | 0.231311422  |
| SPCS1   | 0.273666399  | NUP98  | -0.237005586 | NCKAP1   | 0.36306266   | PAFAH1B2 | -0.277577086 | NFYA    | 0.286723516  |
| SPTY2D1 | -0.282763761 | OAT    | 0.229058357  | NDE1     | 0.242629984  | PAFAH1B3 | -0.286052047 | NHP2L1  | 0.295879549  |
| SUB1    | -0.2537187   | OGFOD3 | -0.336075491 | NEFM     | 0.341935424  | PAGR1    | -0.633955817 | NME3    | 0.363214261  |
| SUMO1   | -0.309873695 | OR1M1  | 0.245106299  | NEK7     | -0.43613965  | PALLD    | -0.266317459 | NUCB1   | -0.298173401 |
| TAF12   | -0.244093663 | ORC1   | -0.386602299 | NOC3L    | 0.258644975  | PDE7B    | -0.261527872 | NUP98   | -0.210698314 |
| TCEB3   | -0.300096738 | OSBP   | -0.260363141 | NT5C2    | -0.353806158 | PEX16    | -0.62561786  | OMA1    | -0.340822428 |
| TCOF1   | -0.582391813 | OSTC   | 0.353526173  | NTPCR    | 0.249867221  | PFKFB2   | -0.278408867 | ORC1    | -0.312745454 |
| TP53I11 | 0.24337319   | P4HB   | 0.287704719  | NUF2     | -0.323597974 | PFKP     | -1.230178296 | OSBP    | -0.224894387 |
| TRIP6   | -0.367218785 | PAF1   | 0.245794345  | NXF1     | -0.290915556 | PHPT1    | 0.244380139  | PAGR1   | -0.511592794 |
| TUBA1B  | 0.362507855  | PAGR1  | -0.902370725 | OGFOD3   | -0.360483478 | PLCG1    | -0.308275649 | PALLD   | -0.211137624 |
| TUBA1C  | 0.356290656  | PAIP2  | 0.233698589  | OSBP     | -0.408847496 | PLD3     | -0.304045924 | PALM    | 0.462942701  |
| TWISTNB | -0.276773608 | PAPD5  | -0.280297955 | OSTC     | 0.236088335  | PLOD2    | -0.318947388 | PAPD5   | -0.341795452 |
| UAP1    | 0.317689442  | PBX1   | 0.316852562  | PAFAH1B1 | -0.293895571 | PNISR    | 0.191167821  | PCGF6   | 0.316250516  |
| UBE2A   | -0.839495701 | PDE7B  | -0.374846657 | PAGR1    | -0.886030979 | PODXL2   | 0.263533868  | PCM1    | -0.314917969 |
| UBE2E1  | -0.310424338 | PDHB   | 0.341621686  | PDCD5    | -0.259408228 | POLR2K   | -0.438444014 | PEX3    | 0.391162413  |
| UNC45A  | 0.268841344  | PEX16  | -0.259649747 | PDE7B    | -0.335327919 | POP1     | -0.463568129 | PHF20L1 | 0.391547024  |
| VPS26B  | 0.297528861  | PFAS   | -0.226618252 | PEX16    | -0.419401723 | POTEKP   | -0.343763157 | PJA1    | 0.196515248  |
| VPS4A   | 0.295095984  | PFKFB2 | -0.319003557 | PFKFB2   | -0.405799538 | PPIC     | -0.324956011 | PKN2    | -0.321919142 |
| WDHD1   | -0.360503667 | PFKL   | 0.298529111  | PFKM     | -0.310851328 | PPP1R13B | -0.393295953 | PLAA    | -0.23122803  |
| YBX1    | -0.284928326 | PFKP   | -1.12894572  | PFKP     | -0.777850603 | PPP1R9A  | -0.286159181 | PLS3    | -0.331392324 |
| YTHDF2  | -0.3157826   | PGM1   | 0.350395895  | PLAA     | -0.299063135 | PPP2CB   | -0.354273633 | PNISR   | 0.235759622  |
| YTHDF3  | -0.345485934 | PHB    | 0.524222193  | PLCG1    | -0.332209926 | PPP4R2   | 0.162753913  | POLE3   | 0.352248521  |
| ZC3H4   | -0.303256648 | PHB2   | 0.367943816  | PLOD2    | -0.289075948 | PPP5C    | -0.368011128 | POTEKP  | -0.468783627 |
| ZCCHC3  | -0.279740086 | PLAA   | -0.262888804 | POLR2K   | -0.353565903 | PPP6R3   | 0.408300184  | PPAT    | -0.200032684 |
| ZFH4    | 0.246935407  | POLR1A | -0.258880114 | POP1     | -0.348011969 | PQBP1    | 0.260832761  | PPHLN1  | 0.344516585  |
| ZNF503  | -0.258264013 | POLR1C | -0.29313799  | POTEKP   | -0.316462724 | PROSER2  | 0.375119583  | PPP2CB  | -0.256092231 |
| ZNF770  | 0.497310683  | POLR1E | -0.303422569 | PPP1R13B | -0.266014188 | PRPF39   | 0.195508547  | PPP3CA  | -0.454328729 |
| ZRANB2  | -0.310009016 | POLR2F | 0.274582424  | PPP1R9A  | -0.27696714  | PRR14L   | -0.645649407 | PPP5C   | -0.408701465 |
|         |              | POLR2F | -0.263914048 | PPP6R3   | 0.366154933  | PSAP     | -0.286233969 | PRC1    | 0.340267361  |
|         |              | POLR2K | -0.446183615 | PQBP1    | 0.299071878  | PSMB7    | -0.328265683 | PROSER2 | 0.408360073  |
|         |              | POLR2L | -0.280718245 | PRKDC    | -0.36182495  | PSMC4    | -0.310410632 | PRR14L  | -0.565406217 |

|  |  |          |              |          |              |          |              |          |              |
|--|--|----------|--------------|----------|--------------|----------|--------------|----------|--------------|
|  |  | POP1     | -0.400697063 | PROCR    | -0.359878152 | PSMD12   | 0.339632732  | PRSS1    | 0.513636754  |
|  |  | POTEKP   | 0.724123032  | PROSER2  | 0.358887678  | PSMD7    | -0.269179552 | PSIP1    | 0.320295876  |
|  |  | PPA2     | 0.247929581  | PRR14L   | -0.544866854 | PTGES3   | -0.334970252 | PSMD12   | 0.313266873  |
|  |  | PPAT     | -0.219622028 | PRSS1    | 0.423864461  | PTMA     | 0.284582309  | PSMD6    | -0.293658736 |
|  |  | PPIC     | 0.2967391    | PSMB2    | -0.274628975 | PTMS     | 0.293317198  | PSMG1    | -0.406048196 |
|  |  | PPIF     | 0.309755155  | PSMC4    | -0.236619523 | PWP1     | -0.268519286 | PSMG3    | 0.194765011  |
|  |  | PPP1R14B | 0.269623333  | PSMD13   | -0.36413763  | PYURF    | -0.313713957 | PTGES3   | -0.436513501 |
|  |  | PPP6R3   | 0.413093838  | PSMD14   | -0.361751033 | RAB10    | -0.273965803 | PTRH2    | -0.332401114 |
|  |  | PRCC     | -0.264025246 | PSMD7    | -0.293940806 | RAB18    | 0.364109621  | PTRH2    | -0.332401114 |
|  |  | PRDX3    | 0.325831527  | PTGES3   | -0.331765911 | RAB5B    | -0.321977974 | RAB10    | -0.212275932 |
|  |  | PRDX6    | 0.298576641  | PTMS     | -0.279547393 | RANBP1   | 0.20224131   | RAB35    | -0.193127411 |
|  |  | PRKAR2B  | -0.25324239  | PTPN18   | 0.218450641  | RAP1GDS1 | -0.335875421 | RAI1     | -0.328559346 |
|  |  | PRKCSH   | 0.426105562  | PYURF    | -0.290552412 | RAPGEF3  | -0.289479999 | RAP1GDS1 | -0.194321481 |
|  |  | PRR14L   | -0.227527284 | RAB18    | 0.393644252  | RDH14    | -0.40579057  | RAPGEF3  | -0.193753429 |
|  |  | PRSS1    | 0.282055657  | RAB35    | -0.286394283 | RHOT2    | 0.430380388  | RBMX     | 0.302624957  |
|  |  | PSAP     | 0.29038553   | RABL3    | 0.303687989  | ROMO1    | -0.262014305 | RCN2     | -0.252510891 |
|  |  | PSIP1    | 0.270410468  | RABL6    | -0.302967081 | RPP38    | 0.277329561  | RCOR3    | 0.323430632  |
|  |  | PSMD12   | 0.357519266  | RAP1GDS1 | -0.329252954 | RRM1     | -0.258873791 | RDH14    | -0.327248996 |
|  |  | PSMD13   | -0.223663317 | RAPGEF3  | -0.349225864 | RXFP3    | 1.161003313  | RECQL4   | -0.292228752 |
|  |  | PTGES3   | 0.22745667   | RDH14    | -0.293018688 | SAPCD2   | -0.484252573 | REEP5    | -0.194414383 |
|  |  | RAB18    | 0.931693147  | RHOT2    | 0.255273391  | SCYL1    | -0.456282278 | RIC8A    | -0.292138509 |
|  |  | RABL3    | 0.381974067  | RMDN1    | -0.233088838 | SDF4     | 0.187127839  | RNF114   | 0.249348253  |
|  |  | RAP1GDS1 | -0.223456446 | RPL26L1  | 0.294988125  | SDHC     | 0.319133814  | RPL26    | 0.355459096  |
|  |  | RAP2C    | 0.272894707  | RPL39    | -0.347246007 | SEC61B   | -0.406889442 | RPL26L1  | 0.501164862  |
|  |  | RAPGEF3  | -0.352631921 | RPLP1    | 0.406276582  | SF3B3    | -0.268333853 | RPL27    | 0.296288302  |
|  |  | RHOT2    | 0.41491212   | RPN1     | -0.374766022 | SIGMAR1  | 0.314761295  | RPL32    | 0.296842484  |
|  |  | RNF40    | -0.289219122 | RPS15A   | 0.323438284  | SIPA1L3  | 0.277329561  | RPS27A   | 0.433563692  |
|  |  | RNMTL1   | 0.305780778  | RPS29    | 0.219399704  | SLC12A4  | -0.260314503 | RPS29    | 0.216586466  |
|  |  | ROMO1    | -0.287405341 | RRM1     | -0.28861352  | SLC25A10 | 0.391207117  | RSL1D1   | -0.222766262 |
|  |  | RPL11    | 0.247149903  | RSAD1    | -0.274323224 | SLC25A3  | 0.313638596  | RSRC1    | 0.293548133  |
|  |  | RPLP1    | 0.2657226    | RXFP3    | 0.764157225  | SLC25A5  | 0.291013238  | RXFP3    | 1.02710619   |
|  |  | RPS15    | 0.231670062  | SAFB     | -0.375975387 | SLC25A6  | 0.345630116  | SAPCD2   | -0.361847958 |
|  |  | RPS29    | 0.295645218  | SAPCD2   | -0.365472634 | SLC39A7  | 0.381822541  | SBF1     | -0.210698314 |
|  |  | RRBP1    | -0.377975515 | SCYL1    | -0.491774253 | SMAP     | 0.298609489  | SCYL1    | -0.336625609 |
|  |  | RSAD1    | -0.269073471 | SDF4     | 0.210366611  | SMIM12   | -0.306626776 | SEC11A   | -0.212127052 |
|  |  | RXFP3    | 0.332539234  | SDHC     | 0.507188371  | SNAP29   | -0.275438806 | SEC24B   | -0.327542014 |
|  |  | SAE1     | 0.274420481  | SEC24C   | -0.34849231  | SNX32    | -0.281146701 | SEC61B   | -0.382865568 |
|  |  | SAPCD2   | -0.227535116 | SENP1    | 0.34324141   | SOD1     | 0.241425765  | SETMAR   | -0.312549744 |
|  |  | SBF1     | -0.230725513 | SERF2    | 0.254973119  | SPTLC1   | 0.286351043  | SH3GLB1  | 0.470449981  |
|  |  | SCP2     | 0.254175489  | SF3B3    | -0.355907492 | SRC      | 0.323849012  | SLBP     | 0.194013607  |
|  |  | SCYL1    | -0.303595689 | SIX4     | -0.269750526 | SRRM1    | 0.168246824  | SNRPF    | 0.330069042  |

|  |  |          |              |          |              |          |              |        |              |
|--|--|----------|--------------|----------|--------------|----------|--------------|--------|--------------|
|  |  | SDHC     | 0.503253997  | SLC12A4  | -0.349878479 | SS18     | 0.263533868  | SNX18  | 0.192131666  |
|  |  | SEC61B   | 0.252307588  | SLC25A10 | 0.293123688  | STAT5B   | 0.171827587  | SNX32  | -0.341948944 |
|  |  | SF3B3    | -0.28289445  | SLC25A3  | 0.232901238  | STMN1    | 0.22712901   | SRM    | -0.404918359 |
|  |  | SF3B4    | 0.233423838  | SLC35F6  | -0.259993262 | STX18    | 0.275553045  | SS18   | 0.286614614  |
|  |  | SHMT2    | 0.325394028  | SMAP     | 0.273881889  | SUB1     | 0.172843263  | SSBP1  | 0.316786529  |
|  |  | SLC25A3  | 0.400649567  | SMARCA2  | 0.238666526  | SURF4    | -0.307823846 | SSR2   | 0.321169619  |
|  |  | SLC25A5  | 0.63341201   | SMN1     | -0.290282959 | TAF12    | -0.282400719 | SURF4  | -0.261767519 |
|  |  | SLC25A6  | 0.308575662  | SNRPF    | 0.215381044  | TCEB3    | -0.269918683 | SYPL1  | 0.43447506   |
|  |  | SLC5A6   | 0.280192385  | SNX32    | -0.454265883 | TEX10    | -0.266530718 | TACO1  | 0.304595423  |
|  |  | SLIRP    | 0.293587164  | SPAG9    | -0.270474226 | TFCP2    | 0.261802291  | TAF7   | 0.393611813  |
|  |  | SMAP     | 0.242512344  | SPAST    | -0.24182774  | THOP1    | -0.276764547 | TANC1  | 0.213666027  |
|  |  | SNRPC    | 0.238638004  | SPCS1    | 0.235028598  | TIMM23B  | 0.31448747   | THOP1  | -0.218940958 |
|  |  | SNRPF    | 0.485901548  | SPTLC1   | 0.258114045  | TMEM97   | 0.269815747  | TLE4   | -0.278916246 |
|  |  | SNX32    | -0.405406163 | SSBP1    | 0.234271774  | TMSB10   | 0.296292755  | TMOD2  | 0.285702026  |
|  |  | SOD1     | 0.262857893  | STAU2    | 0.254758676  | TOP1     | -0.266891162 | TMSB10 | 0.596894905  |
|  |  | SP3      | -0.25761403  | SUB1     | -0.274426534 | TPP1     | 0.282205659  | TNPO1  | -0.24151057  |
|  |  | SPCS1    | 0.258816093  | SUMO1    | -0.243908992 | TRIP6    | -0.378068353 | TRUB1  | 0.348103669  |
|  |  | SRP9     | 0.226891728  | SURF4    | -0.418655697 | TRMT1    | -0.294583748 | TXN2   | -0.54321532  |
|  |  | SSBP1    | 0.250213098  | TAF12    | -0.267705652 | TRUB1    | 0.246521159  | UBA52  | 0.204647915  |
|  |  | SSBP3    | -0.265497688 | TARS     | -0.335840107 | TSNAX    | 0.326473458  | UBE2A  | -0.824959839 |
|  |  | STARD7   | -0.270753846 | TCEB3    | -0.303176188 | TSR1     | -0.267347678 | UBE2D3 | -0.235646007 |
|  |  | SUB1     | -0.294724151 | TCOF1    | -0.296797933 | TUBA1C   | 0.315782949  | UBQLN2 | -0.206008651 |
|  |  | SUMF2    | 0.32372617   | TFCP2    | 0.237522123  | TUBB2A   | -0.250716593 | UBXN1  | -0.304996298 |
|  |  | SUMO2    | 0.294173095  | THOP1    | -0.384116197 | TWISTNB  | -0.465514395 | UMPS   | 0.406546816  |
|  |  | TAF15    | 0.227736067  | TIMM23B  | 0.276149061  | TXN2     | -0.515007866 | UPRT   | 0.311199245  |
|  |  | TARBP1   | 0.247526931  | TMEM192  | 0.243328084  | UBE2A    | -0.892186016 | VDAC1  | -0.203075968 |
|  |  | TBC1D22A | -0.237435771 | TRABD    | 0.269746753  | UBE2Q1   | 0.352671912  | VDAC3  | -0.353606114 |
|  |  | TBL1X    | -0.31221521  | TRIP6    | -0.372678099 | UBQLN2   | -0.486822208 | VIM    | 0.509646957  |
|  |  | TCEB3    | -0.355949751 | TRMT1    | -0.332269444 | UBXN1    | -0.303402151 | VPS26B | 0.446219236  |
|  |  | TCOF1    | -0.344333319 | TRUB1    | 0.320402465  | UMPS     | -0.261758593 | VPS4B  | -0.25895361  |
|  |  | TFG      | 0.27496231   | TSPO     | 0.276014529  | UNC45A   | -0.254807182 | VPS52  | 0.229762954  |
|  |  | THOP1    | -0.262709858 | TSR1     | -0.340591252 | UNC45A   | 0.41764516   | VTN    | 0.601159672  |
|  |  | TIMM23B  | 0.259423732  | TTC1     | -0.251806347 | UQCR10   | 0.528803227  | WARS2  | 0.320965195  |
|  |  | TMSB10   | 0.28265838   | TUBA1C   | 0.307700993  | VDAC3    | -0.326791003 | WDR18  | -0.194414383 |
|  |  | TNIK     | 0.531770542  | TUBB2A   | -0.345043927 | VIM      | 0.413561921  | XPOT   | -0.218310365 |
|  |  | TRAP1    | 0.319894477  | TWISTNB  | -0.293398643 | VKORC1L1 | -0.282036171 | XRCC1  | -0.219378357 |
|  |  | TRIP6    | -0.386335947 | TXN2     | -0.407522873 | VPS4A    | 0.285761947  | YWHAB  | -0.261109976 |
|  |  | TRMT1    | -0.295944519 | UBAP2L   | -0.239026733 | VPS4B    | -0.275188547 | ZCCHC3 | -0.316855189 |
|  |  | TSPYL1   | 0.291178656  | UBE2A    | -0.849961025 | VTN      | 0.801930718  | ZFH4   | 0.548190039  |
|  |  | TUBA1B   | 0.395466636  | UBE2E1   | -0.338544375 | WLS      | -0.365833819 | ZNF503 | 0.357190649  |
|  |  | TUBA1C   | 0.471246419  | UBQLN2   | -0.533395195 | XPOT     | -0.27881383  | ZNF770 | 0.317782013  |

|  |  |         |              |          |              |        |              |  |  |
|--|--|---------|--------------|----------|--------------|--------|--------------|--|--|
|  |  | TUBB    | 0.312926441  | UBXN1    | -0.297552402 | XRCC1  | -0.269213737 |  |  |
|  |  | TUBB4A  | 0.293671533  | UCHL1    | -0.37154306  | YWHAB  | -0.351949839 |  |  |
|  |  | TUBB4B  | 0.4437489    | UGDH     | -0.33201802  | ZC3H4  | -0.373634222 |  |  |
|  |  | TUFM    | 0.267032784  | UNC45A   | -0.344025899 | ZCCHC3 | -0.4459702   |  |  |
|  |  | TWISTNB | -0.510116131 | UPRT     | 0.328623828  | ZNF687 | 0.271599153  |  |  |
|  |  | UAP1    | 0.362792125  | VAR5     | -0.300088406 | ZNF770 | 0.377211323  |  |  |
|  |  | UBE2Q1  | 0.328502496  | VDAC3    | -0.3044461   | ZNF787 | -0.256020733 |  |  |
|  |  | UNC45A  | 0.281457635  | VIM      | 0.567393962  |        |              |  |  |
|  |  | UQCRC1  | 0.566006472  | VKORC1L1 | -0.24555434  |        |              |  |  |
|  |  | USMG5   | 0.260163341  | VPS4A    | 0.233847304  |        |              |  |  |
|  |  | VAPA    | 0.240333618  | VPS4B    | -0.289591132 |        |              |  |  |
|  |  | VAR5    | -0.224041817 | VTN      | 0.463820195  |        |              |  |  |
|  |  | VDAC1   | 0.500569412  | WASL     | -0.29162164  |        |              |  |  |
|  |  | VDAC2   | 0.309128037  | WDHD1    | -0.258315821 |        |              |  |  |
|  |  | VIM     | 0.337014238  | WDR1     | -0.342584339 |        |              |  |  |
|  |  | VPS26B  | 0.281157136  | XPO1     | -0.288833023 |        |              |  |  |
|  |  | VPS4B   | -0.264477595 | XPOT     | -0.434711182 |        |              |  |  |
|  |  | WARS    | 0.286364406  | YKT6     | -0.355732125 |        |              |  |  |
|  |  | WDHD1   | -0.350371352 | YWHAQ    | -0.263782379 |        |              |  |  |
|  |  | WDR74   | -0.281001088 | ZC3H4    | -0.315802816 |        |              |  |  |
|  |  | YBX1    | -0.262427682 | ZC3HAV1  | -0.333918517 |        |              |  |  |
|  |  | YTHDF2  | -0.332185987 | ZCCHC3   | -0.319705956 |        |              |  |  |
|  |  | YTHDF3  | -0.283151122 | ZFHX4    | 0.353352324  |        |              |  |  |
|  |  | ZCCHC3  | -0.294115599 | ZNF770   | 0.384808739  |        |              |  |  |
|  |  | ZRANB2  | -0.261714359 | ZYX      | -0.474780634 |        |              |  |  |
