# Supplementary material for: The RXFP3 receptor is functionally associated with cellular responses to oxidative stress and DNA damage
Source: publisher site journal article supplement (doi:10.18632/aging.102528), 2019-12-03
Supplement: Supplementary file [file aging-v11i23-102528-supplementary-material-SD3.pdf]

**Table S2. Enrichr-based PPI Hub Protein enrichment analysis (0.5µg RAFP3).** Hub Protein-Protein Interaction enrichment analysis was performed using the Enrichr (<http://amp.pharm.mssm.edu/Enrichr/>) functional annotation suite with the 0.5µg perturbation level of RAFP3 expression. For each enriched target PPI hub protein the overlap protein identity from the input dataset with the Enrichr-curated hub data (Overlap), the probability of PPI hub enrichment (P-value), cumulated Z-score (Z-score), Combined ranking score (Combined Score) and the protein identities from the input dataset that overlap with the Enrichr-curated PPI Hub dataset (Proteins) are detailed.

| Term      | Overlap | P-value  | Z-score  | Combined Score | Proteins                                                   |
|-----------|---------|----------|----------|----------------|------------------------------------------------------------|
| GABARAP   | 10/479  | 6.76E-08 | -1.33564 | 22.05072       | NEDD4;KRT2;KRT1;HSPA6;CALR;KRT10;GYG1;GABARAP;KRT9;FTSJ3   |
| GABARAPL1 | 10/499  | 9.9E-08  | -1.28259 | 20.68569       | NEDD4;KRT2;KRT1;HSPA6;CALR;KRT10;GYG1;GABARAP;KRT9;FTSJ3   |
| GABARAPL2 | 10/539  | 2.02E-07 | -1.25339 | 19.31853       | PRKCSH;NEDD4;KRT2;KRT1;HSPA6;CALR;KRT10;GABARAP;KRT9;FTSJ3 |
| MAP1LC3B  | 7/322   | 6.04E-06 | -1.35199 | 16.24769       | NEDD4;KRT2;KRT1;HSPA6;KRT10;GABARAP;KRT9                   |
| MAP1LC3A  | 7/383   | 1.86E-05 | -1.38571 | 15.09327       | NEDD4;KRT2;KRT1;HSPA6;KRT10;GABARAP;KRT9                   |
| ALB       | 5/164   | 2.92E-05 | -1.57998 | 16.49446       | KRT1;KRT10;HBA1;GABARAP;KRT9                               |
| MDM2      | 5/197   | 7.01E-05 | -1.56364 | 14.9581        | KRT2;KRT1;UBE2A;KRT10;KRT9                                 |
| RPS6KA3   | 6/375   | 0.000161 | -1.79306 | 15.65603       | PFKFB2;HIST1H3A;PRKAR2B;NEDD4;HIST1H1D;NOLC1               |
| NEDD4     | 4/141   | 0.000258 | -1.67209 | 13.81472       | HGS;NEDD4;UBE2E1;GABARAP                                   |
| PRKCZ     | 4/156   | 0.000379 | -1.16772 | 9.198523       | PPP2CB;PRKCSH;KRT10;GABARAP                                |
| YWHAQ     | 4/188   | 0.000765 | -1.67716 | 12.03429       | PFKFB2;KRT1;GABARAP;KRT9                                   |
| HIST1H3A  | 3/122   | 0.002444 | -1.49499 | 8.991068       | HIST1H3A;CBX1;CHD3                                         |
| CHD3      | 3/132   | 0.003054 | -1.67741 | 9.714177       | HIST1H3A;ATPIF1;CHD3                                       |
| APC       | 3/150   | 0.004373 | -1.53853 | 8.35783        | HGS;KRT1;KRT9                                              |
| SMAD3     | 4/328   | 0.005754 | -1.1972  | 6.175001       | HGS;NEDD4;KRT2;KRT10                                       |
| PRKCB     | 4/338   | 0.00639  | -1.1559  | 5.840841       | PFKFB2;PPP2CB;HIST1H1D;NOLC1                               |
| MAPK14    | 5/552   | 0.007032 | -1.10582 | 5.481799       | HIST1H3A;NOLC1;RRBP1;UBE2A;CHD3                            |
| ESR2      | 4/361   | 0.008026 | -1.14015 | 5.501261       | HSPA6;NOLC1;RRBP1;FTSJ3                                    |
| PRKCE     | 3/193   | 0.008764 | -0.45225 | 2.142379       | PRKAR2B;KRT1;HIST1H1D                                      |
| CDK2      | 5/675   | 0.015814 | -0.90944 | 3.771282       | HIST1H1D;NOLC1;RRBP1;UBE2A;CHD3                            |
| APP       | 3/247   | 0.016984 | -1.40734 | 5.735579       | HGS;NEDD4;CALR                                             |
| YWHAZ     | 4/500   | 0.023826 | -1.0341  | 3.864411       | PFKFB2;NOLC1;CALR;GABARAP                                  |
| CLTC      | 2/120   | 0.028666 | -1.24766 | 4.431718       | HGS;GABARAP                                                |
| C1ORF103  | 2/122   | 0.029552 | -1.16796 | 4.113067       | CBX1;CHD3                                                  |
| UBC       | 4/540   | 0.030466 | -0.85906 | 2.9991         | HGS;NEDD4;UBE2E1;UBE2A                                     |
| TUBB      | 2/125   | 0.030902 | -1.23014 | 4.277123       | HGS;GABARAP                                                |
| CDH1      | 2/127   | 0.031815 | -1.28861 | 4.44291        | KRT1;KRT9                                                  |
| IL7R      | 2/127   | 0.031815 | -1.19995 | 4.137224       | HSPA6;CALR                                                 |
| MED19     | 2/127   | 0.031815 | -1.1011  | 3.79638        | NOLC1;POLR2G                                               |
| BTK       | 2/128   | 0.032275 | 1.706575 | -5.85944       | H2AFZ;CBX1                                                 |
| TRAF6     | 4/550   | 0.032281 | -1.01787 | 3.494609       | PPP2CB;PRKCSH;UBE2E1;CALR                                  |
| HNRNPA1   | 2/130   | 0.033204 | -1.16396 | 3.963383       | CBX1;GABARAP                                               |

|         |       |          |          |          |                         |
|---------|-------|----------|----------|----------|-------------------------|
| ARRB2   | 3/323 | 0.033964 | -0.92202 | 3.118695 | NEDD4;HSPA6;NOLC1       |
| UBB     | 2/135 | 0.035573 | -1.09521 | 3.653822 | HGS;NEDD4               |
| TOP1    | 2/136 | 0.036054 | -1.41127 | 4.68927  | HIST1H1D;GABARAP        |
| TCP1    | 2/139 | 0.037513 | -1.73702 | 5.702743 | PPP2CB;GABARAP          |
| XRCC6   | 2/141 | 0.038499 | -1.02116 | 3.326057 | NEDD4;GABARAP           |
| UBA1    | 2/144 | 0.039995 | -1.74521 | 5.617823 | HGS;NEDD4               |
| NPM1    | 2/144 | 0.039995 | -1.14444 | 3.683938 | HIST1H3A;GABARAP        |
| PPP2R1A | 2/146 | 0.041005 | -0.98917 | 3.159461 | PPP2CB;GABARAP          |
| AKT1    | 3/355 | 0.043012 | 0.483723 | -1.52192 | PFKFB2;PALLD;KRT10      |
| EP300   | 3/357 | 0.043614 | -0.81789 | 2.561937 | HIST1H3A;GPBP1;HIST1H1D |
| RIF1    | 2/157 | 0.046729 | -1.09916 | 3.367133 | CBX1;CHD3               |
| RPA2    | 2/162 | 0.049423 | -1.74402 | 5.244836 | KIN;CBX1                |
