# Supplementary material for: The RXFP3 receptor is functionally associated with cellular responses to oxidative stress and DNA damage
Source: publisher site journal article supplement (doi:10.18632/aging.102528), 2019-12-03
Supplement: Supplementary file [file aging-v11i23-102528-supplementary-material-SD9.pdf]

**Table S8. GIT2 theoretical data set.** Biomedical text word items, *i.e.* Gene Symbols, associated with generic 'GIT2' linked extraction terms are represented. All proteins identified possess a Cosine Similarity score of association with the interrogator term of >0.1.

| Gene Symbol | GIT2  | GIT-2 | CAT-2 | CAT2  | Cat2  | Cat-2 | Git2  | Git-2 | ARF<br>GAP<br>GIT2 | CAT 2 | Cool-interacting<br>tyrosine<br>phosphorylated<br>protein 2 | Cool-<br>interacting<br>protein 2 | Cool<br>interacting<br>tyrosine<br>phosphorylated<br>protein 2 |
|-------------|-------|-------|-------|-------|-------|-------|-------|-------|--------------------|-------|-------------------------------------------------------------|-----------------------------------|----------------------------------------------------------------|
| rab34       | 0.284 | 0     | 0.113 | 0.139 | 0.139 | 0.113 | 0.284 | 0     | 0.29               | 0.139 | 0.143                                                       | 0.142                             | 0.155                                                          |
| dpep3       | 0.113 | 0     | 0.121 | 0.18  | 0.18  | 0.121 | 0.113 | 0     | 0.11               | 0.18  | 0.186                                                       | 0.185                             | 0                                                              |
| cylc1       | 0.113 | 0     | 0     | 0.118 | 0.118 | 0     | 0.113 | 0     | 0.114              | 0.118 | 0.146                                                       | 0.145                             | 0.111                                                          |
| oxsr1       | 0.16  | 0     | 0     | 0.189 | 0.189 | 0     | 0.16  | 0     | 0.158              | 0.189 | 0.263                                                       | 0.263                             | 0.153                                                          |
| ppp1r14b    | 0.23  | 0     | 0     | 0.146 | 0.146 | 0     | 0.23  | 0     | 0.246              | 0.146 | 0.18                                                        | 0.178                             | 0.12                                                           |
| serpinh1p1  | 0.17  | 0     | 0     | 0.135 | 0.135 | 0     | 0.17  | 0     | 0.177              | 0.135 | 0.227                                                       | 0.226                             | 0.142                                                          |
| clvs1       | 0.229 | 0     | 0     | 0.103 | 0.103 | 0     | 0.229 | 0     | 0.227              | 0.103 | 0.225                                                       | 0.224                             | 0.134                                                          |
| pklr        | 0.233 | 0     | 0     | 0.115 | 0.115 | 0     | 0.233 | 0     | 0.235              | 0.115 | 0.34                                                        | 0.339                             | 0.213                                                          |
| rimkla      | 0.119 | 0     | 0     | 0.147 | 0.147 | 0     | 0.119 | 0     | 0.114              | 0.147 | 0.155                                                       | 0.155                             | 0.156                                                          |
| agbl4       | 0.124 | 0     | 0     | 0.101 | 0.101 | 0     | 0.124 | 0     | 0.121              | 0.101 | 0.177                                                       | 0.177                             | 0.118                                                          |
| slc25a24    | 0.174 | 0     | 0     | 0.132 | 0.132 | 0     | 0.174 | 0     | 0.181              | 0.132 | 0.177                                                       | 0.176                             | 0.134                                                          |
| pgm1        | 0.154 | 0     | 0     | 0.102 | 0.102 | 0     | 0.154 | 0     | 0.153              | 0.102 | 0.216                                                       | 0.216                             | 0.136                                                          |
| mrx23       | 0.153 | 0     | 0     | 0.199 | 0.199 | 0     | 0.153 | 0     | 0.147              | 0.199 | 0.248                                                       | 0.248                             | 0.145                                                          |
| piezo1      | 0.226 | 0     | 0     | 0.146 | 0.146 | 0     | 0.226 | 0     | 0.233              | 0.146 | 0.337                                                       | 0.336                             | 0.275                                                          |
| arf3        | 0.193 | 0     | 0     | 0.107 | 0.107 | 0     | 0.193 | 0     | 0.203              | 0.107 | 0.121                                                       | 0.12                              | 0.113                                                          |
| mrx24       | 0.233 | 0     | 0     | 0.111 | 0.111 | 0     | 0.233 | 0     | 0.233              | 0.111 | 0.345                                                       | 0.345                             | 0.206                                                          |
| cpsf6       | 0.168 | 0     | 0     | 0.111 | 0.111 | 0     | 0.168 | 0     | 0.169              | 0.111 | 0.199                                                       | 0.198                             | 0.131                                                          |
| slc17a4     | 0.119 | 0     | 0     | 0.138 | 0.138 | 0     | 0.119 | 0     | 0.114              | 0.138 | 0.177                                                       | 0.177                             | 0.103                                                          |
| svil        | 0.182 | 0     | 0     | 0.136 | 0.136 | 0     | 0.182 | 0     | 0.181              | 0.136 | 0.164                                                       | 0.162                             | 0.124                                                          |
| nudt16l1    | 0.242 | 0     | 0     | 0.139 | 0.139 | 0     | 0.242 | 0     | 0.236              | 0.139 | 0.253                                                       | 0.252                             | 0.201                                                          |
| stk24       | 0.504 | 0     | 0.139 | 0     | 0     | 0.139 | 0.504 | 0     | 0.499              | 0     | 0.72                                                        | 0.719                             | 0.407                                                          |
| nipsnap1    | 0.154 | 0.154 | 0     | 0.118 | 0.118 | 0     | 0.154 | 0.154 | 0                  | 0.118 | 0                                                           | 0                                 | 0.118                                                          |
| adap2       | 0.118 | 0     | 0.118 | 0.121 | 0.121 | 0.118 | 0.118 | 0     | 0.124              | 0.121 | 0                                                           | 0                                 | 0                                                              |
| sntn        | 0.128 | 0     | 0.131 | 0.12  | 0.12  | 0.131 | 0.128 | 0     | 0.129              | 0.12  | 0                                                           | 0                                 | 0                                                              |
| trim50      | 0.105 | 0     | 0     | 0.113 | 0.113 | 0     | 0.105 | 0     | 0.115              | 0.113 | 0.151                                                       | 0.15                              | 0                                                              |
| cib4        | 0.1   | 0     | 0     | 0.126 | 0.126 | 0     | 0.1   | 0     | 0.105              | 0.126 | 0.123                                                       | 0.123                             | 0                                                              |
| ap1m2       | 0.104 | 0     | 0     | 0.121 | 0.121 | 0     | 0.104 | 0     | 0.105              | 0.121 | 0.112                                                       | 0.111                             | 0                                                              |
| exoc6b      | 0.215 | 0     | 0     | 0.117 | 0.117 | 0     | 0.215 | 0     | 0.221              | 0.117 | 0.116                                                       | 0.115                             | 0                                                              |
| shank2      | 0.142 | 0     | 0     | 0.106 | 0.106 | 0     | 0.142 | 0     | 0.146              | 0.106 | 0.141                                                       | 0.14                              | 0                                                              |
| alg2        | 0.118 | 0     | 0     | 0.111 | 0.111 | 0     | 0.118 | 0     | 0.123              | 0.111 | 0                                                           | 0                                 | 0.118                                                          |
| eea1        | 0.127 | 0     | 0     | 0.147 | 0.147 | 0     | 0.127 | 0     | 0.132              | 0.147 | 0                                                           | 0                                 | 0.13                                                           |
| pikfyve     | 0.176 | 0     | 0     | 0.121 | 0.121 | 0     | 0.176 | 0     | 0.182              | 0.121 | 0                                                           | 0                                 | 0.108                                                          |
| ocrl        | 0.121 | 0     | 0     | 0.114 | 0.114 | 0     | 0.121 | 0     | 0.129              | 0.114 | 0                                                           | 0                                 | 0.136                                                          |
| rab4a       | 0.171 | 0     | 0     | 0.102 | 0.102 | 0     | 0.171 | 0     | 0.174              | 0.102 | 0                                                           | 0                                 | 0.152                                                          |

|          |       |   |       |       |       |       |       |   |       |       |       |       |       |
|----------|-------|---|-------|-------|-------|-------|-------|---|-------|-------|-------|-------|-------|
| opa2     | 0     | 0 | 0     | 0.125 | 0.125 | 0     | 0     | 0 | 0.106 | 0.125 | 0.177 | 0.177 | 0.108 |
| plek     | 0.201 | 0 | 0     | 0.108 | 0.108 | 0     | 0.201 | 0 | 0.201 | 0.108 | 0.102 | 0     | 0     |
| pld1     | 0.106 | 0 | 0     | 0.203 | 0.203 | 0     | 0.106 | 0 | 0.106 | 0.203 | 0.1   | 0     | 0     |
| slc2a4rg | 0     | 0 | 0.145 | 0.141 | 0.141 | 0.145 | 0     | 0 | 0     | 0.141 | 0.116 | 0.115 | 0     |
| tbc1d25  | 0.126 | 0 | 0     | 0.112 | 0.112 | 0     | 0.126 | 0 | 0.137 | 0.112 | 0     | 0     | 0.1   |
| sgsm1    | 0.145 | 0 | 0.164 | 0     | 0     | 0.164 | 0.145 | 0 | 0.155 | 0     | 0     | 0     | 0.145 |
| pki55    | 0     | 0 | 0.137 | 0.154 | 0.154 | 0.137 | 0     | 0 | 0     | 0.154 | 0     | 0     | 0.147 |
| cygb     | 0     | 0 | 0.193 | 0.145 | 0.145 | 0.193 | 0     | 0 | 0     | 0.145 | 0     | 0     | 0.103 |
| cdkl2    | 0     | 0 | 0.105 | 0.107 | 0.107 | 0.105 | 0     | 0 | 0     | 0.107 | 0     | 0     | 0.115 |
| myo10    | 0.206 | 0 | 0     | 0     | 0     | 0     | 0.206 | 0 | 0.213 | 0     | 0.118 | 0.117 | 0.106 |
| pdpk1    | 0.206 | 0 | 0     | 0     | 0     | 0     | 0.206 | 0 | 0.206 | 0     | 0.261 | 0.259 | 0.128 |
| arfgap2  | 0.208 | 0 | 0     | 0     | 0     | 0     | 0.208 | 0 | 0.206 | 0     | 0.113 | 0.112 | 0.115 |
| rrdx     | 0.208 | 0 | 0     | 0     | 0     | 0     | 0.208 | 0 | 0.21  | 0     | 0.336 | 0.336 | 0.189 |
| raver1   | 0.209 | 0 | 0     | 0     | 0     | 0     | 0.209 | 0 | 0.221 | 0     | 0.153 | 0.152 | 0.114 |
| wdr44    | 0.21  | 0 | 0     | 0     | 0     | 0     | 0.21  | 0 | 0.211 | 0     | 0.157 | 0.157 | 0.107 |
| mst4     | 0.208 | 0 | 0     | 0     | 0     | 0     | 0.208 | 0 | 0.204 | 0     | 0.283 | 0.282 | 0.162 |
| enpp7    | 0.207 | 0 | 0     | 0     | 0     | 0     | 0.207 | 0 | 0.203 | 0     | 0.24  | 0.239 | 0.15  |
| cap1     | 0.196 | 0 | 0     | 0     | 0     | 0     | 0.196 | 0 | 0.193 | 0     | 0.217 | 0.216 | 0.159 |
| map4k5   | 0.191 | 0 | 0     | 0     | 0     | 0     | 0.191 | 0 | 0.188 | 0     | 0.139 | 0.138 | 0.216 |
| spen     | 0.191 | 0 | 0     | 0     | 0     | 0     | 0.191 | 0 | 0.187 | 0     | 0.294 | 0.294 | 0.167 |
| rpsap12  | 0.193 | 0 | 0     | 0     | 0     | 0     | 0.193 | 0 | 0.194 | 0     | 0.282 | 0.281 | 0.151 |
| fmnl3    | 0.19  | 0 | 0     | 0     | 0     | 0     | 0.19  | 0 | 0.188 | 0     | 0.134 | 0.133 | 0.106 |
| dok2     | 0.189 | 0 | 0     | 0     | 0     | 0     | 0.189 | 0 | 0.191 | 0     | 0.164 | 0.162 | 0.136 |
| ptma     | 0.187 | 0 | 0     | 0     | 0     | 0     | 0.187 | 0 | 0.192 | 0     | 0.11  | 0.11  | 0.102 |
| sh3yl1   | 0.188 | 0 | 0     | 0     | 0     | 0     | 0.188 | 0 | 0.183 | 0     | 0.169 | 0.168 | 0.142 |
| tnk2     | 0.188 | 0 | 0     | 0     | 0     | 0     | 0.188 | 0 | 0.189 | 0     | 0.383 | 0.382 | 0.257 |
| rpsap13  | 0.193 | 0 | 0     | 0     | 0     | 0     | 0.193 | 0 | 0.194 | 0     | 0.282 | 0.281 | 0.151 |
| arhgef7  | 0.813 | 0 | 0     | 0     | 0     | 0     | 0.813 | 0 | 0.801 | 0     | 0.9   | 0.9   | 0.55  |
| arpc2    | 0.201 | 0 | 0     | 0     | 0     | 0     | 0.201 | 0 | 0.204 | 0     | 0.236 | 0.235 | 0.154 |
| swap70   | 0.204 | 0 | 0     | 0     | 0     | 0     | 0.204 | 0 | 0.207 | 0     | 0.142 | 0.14  | 0.109 |
| ap1s3    | 0.205 | 0 | 0     | 0     | 0     | 0     | 0.205 | 0 | 0.203 | 0     | 0.255 | 0.254 | 0.171 |
| htra3    | 0.117 | 0 | 0     | 0     | 0     | 0     | 0.117 | 0 | 0.119 | 0     | 0.187 | 0.186 | 0.116 |
| arhgap31 | 0.199 | 0 | 0     | 0     | 0     | 0     | 0.199 | 0 | 0.199 | 0     | 0.159 | 0.158 | 0.145 |
| tbc1d3f  | 0.194 | 0 | 0     | 0     | 0     | 0     | 0.194 | 0 | 0.197 | 0     | 0.116 | 0.115 | 0.127 |
| clns1ap1 | 0.198 | 0 | 0     | 0     | 0     | 0     | 0.198 | 0 | 0.197 | 0     | 0.327 | 0.326 | 0.178 |
| cib1     | 0.205 | 0 | 0     | 0     | 0     | 0     | 0.205 | 0 | 0.204 | 0     | 0.266 | 0.266 | 0.153 |
| tjap1    | 0.217 | 0 | 0     | 0     | 0     | 0     | 0.217 | 0 | 0.225 | 0     | 0.236 | 0.236 | 0.124 |
| hip1     | 0.237 | 0 | 0     | 0     | 0     | 0     | 0.237 | 0 | 0.24  | 0     | 0.247 | 0.246 | 0.157 |
| fnbp1l   | 0.113 | 0 | 0     | 0     | 0     | 0     | 0.113 | 0 | 0.117 | 0     | 0.17  | 0.17  | 0.155 |
| zyx      | 0.238 | 0 | 0     | 0     | 0     | 0     | 0.238 | 0 | 0.24  | 0     | 0.119 | 0.118 | 0.109 |
| abi2     | 0.238 | 0 | 0     | 0     | 0     | 0     | 0.238 | 0 | 0.237 | 0     | 0.177 | 0.176 | 0.149 |

|          |       |   |   |   |   |   |       |   |       |   |       |       |       |
|----------|-------|---|---|---|---|---|-------|---|-------|---|-------|-------|-------|
| srgap2   | 0.235 | 0 | 0 | 0 | 0 | 0 | 0.235 | 0 | 0.234 | 0 | 0.129 | 0.128 | 0.106 |
| ebp      | 0.113 | 0 | 0 | 0 | 0 | 0 | 0.113 | 0 | 0.11  | 0 | 0.23  | 0.229 | 0.141 |
| fkbp15   | 0.227 | 0 | 0 | 0 | 0 | 0 | 0.227 | 0 | 0.226 | 0 | 0.248 | 0.247 | 0.271 |
| agap1    | 0.228 | 0 | 0 | 0 | 0 | 0 | 0.228 | 0 | 0.237 | 0 | 0.138 | 0.137 | 0.133 |
| cdc42se1 | 0.23  | 0 | 0 | 0 | 0 | 0 | 0.23  | 0 | 0.23  | 0 | 0.165 | 0.164 | 0.13  |
| sh2d3c   | 0.231 | 0 | 0 | 0 | 0 | 0 | 0.231 | 0 | 0.228 | 0 | 0.13  | 0.128 | 0.156 |
| scax1    | 0.239 | 0 | 0 | 0 | 0 | 0 | 0.239 | 0 | 0.247 | 0 | 0.387 | 0.387 | 0.256 |
| macf1    | 0.239 | 0 | 0 | 0 | 0 | 0 | 0.239 | 0 | 0.235 | 0 | 0.235 | 0.234 | 0.134 |
| rap1gap  | 0.248 | 0 | 0 | 0 | 0 | 0 | 0.248 | 0 | 0.251 | 0 | 0.113 | 0.112 | 0.138 |
| rsf1     | 0.248 | 0 | 0 | 0 | 0 | 0 | 0.248 | 0 | 0.25  | 0 | 0.371 | 0.37  | 0.222 |
| copg1    | 0.249 | 0 | 0 | 0 | 0 | 0 | 0.249 | 0 | 0.252 | 0 | 0.236 | 0.235 | 0.154 |
| enah     | 0.249 | 0 | 0 | 0 | 0 | 0 | 0.249 | 0 | 0.26  | 0 | 0.135 | 0.133 | 0.108 |
| abi1     | 0.245 | 0 | 0 | 0 | 0 | 0 | 0.245 | 0 | 0.244 | 0 | 0.163 | 0.161 | 0.115 |
| crkl     | 0.244 | 0 | 0 | 0 | 0 | 0 | 0.244 | 0 | 0.24  | 0 | 0.171 | 0.169 | 0.471 |
| pkn1     | 0.24  | 0 | 0 | 0 | 0 | 0 | 0.24  | 0 | 0.24  | 0 | 0.223 | 0.221 | 0.116 |
| arpc1b   | 0.241 | 0 | 0 | 0 | 0 | 0 | 0.241 | 0 | 0.248 | 0 | 0.4   | 0.4   | 0.257 |
| rapgef1  | 0.243 | 0 | 0 | 0 | 0 | 0 | 0.243 | 0 | 0.241 | 0 | 0.15  | 0.148 | 0.477 |
| abi3bp   | 0.227 | 0 | 0 | 0 | 0 | 0 | 0.227 | 0 | 0.235 | 0 | 0.236 | 0.235 | 0.17  |
| exoc3    | 0.225 | 0 | 0 | 0 | 0 | 0 | 0.225 | 0 | 0.226 | 0 | 0.249 | 0.248 | 0.155 |
| ppm1f    | 0.214 | 0 | 0 | 0 | 0 | 0 | 0.214 | 0 | 0.21  | 0 | 0.344 | 0.343 | 0.245 |
| dok1     | 0.216 | 0 | 0 | 0 | 0 | 0 | 0.216 | 0 | 0.219 | 0 | 0.168 | 0.164 | 0.135 |
| bmh      | 0.218 | 0 | 0 | 0 | 0 | 0 | 0.218 | 0 | 0.216 | 0 | 0.292 | 0.29  | 0.175 |
| rhoj     | 0.219 | 0 | 0 | 0 | 0 | 0 | 0.219 | 0 | 0.217 | 0 | 0.344 | 0.344 | 0.253 |
| cf1      | 0.214 | 0 | 0 | 0 | 0 | 0 | 0.214 | 0 | 0.213 | 0 | 0.192 | 0.191 | 0.109 |
| ankrd52  | 0.114 | 0 | 0 | 0 | 0 | 0 | 0.114 | 0 | 0.114 | 0 | 0.111 | 0.109 | 0.163 |
| rasl11a  | 0.212 | 0 | 0 | 0 | 0 | 0 | 0.212 | 0 | 0.212 | 0 | 0.19  | 0.189 | 0.13  |
| prdm10   | 0.115 | 0 | 0 | 0 | 0 | 0 | 0.115 | 0 | 0.115 | 0 | 0.172 | 0.171 | 0.114 |
| arap3    | 0.213 | 0 | 0 | 0 | 0 | 0 | 0.213 | 0 | 0.217 | 0 | 0.124 | 0.122 | 0.237 |
| arl10    | 0.22  | 0 | 0 | 0 | 0 | 0 | 0.22  | 0 | 0.219 | 0 | 0.221 | 0.221 | 0.141 |
| arl9     | 0.22  | 0 | 0 | 0 | 0 | 0 | 0.22  | 0 | 0.219 | 0 | 0.221 | 0.221 | 0.141 |
| arpc4    | 0.223 | 0 | 0 | 0 | 0 | 0 | 0.223 | 0 | 0.226 | 0 | 0.237 | 0.235 | 0.157 |
| zcchc13  | 0.224 | 0 | 0 | 0 | 0 | 0 | 0.224 | 0 | 0.217 | 0 | 0.289 | 0.289 | 0.143 |
| snx27    | 0.224 | 0 | 0 | 0 | 0 | 0 | 0.224 | 0 | 0.227 | 0 | 0.239 | 0.237 | 0.219 |
| top1     | 0.223 | 0 | 0 | 0 | 0 | 0 | 0.223 | 0 | 0.22  | 0 | 0.325 | 0.325 | 0.168 |
| wbscr17  | 0.222 | 0 | 0 | 0 | 0 | 0 | 0.222 | 0 | 0.218 | 0 | 0.148 | 0.147 | 0.132 |
| flna     | 0.22  | 0 | 0 | 0 | 0 | 0 | 0.22  | 0 | 0.218 | 0 | 0.227 | 0.226 | 0.131 |
| larp4    | 0.221 | 0 | 0 | 0 | 0 | 0 | 0.221 | 0 | 0.219 | 0 | 0.328 | 0.328 | 0.194 |
| actn1    | 0.222 | 0 | 0 | 0 | 0 | 0 | 0.222 | 0 | 0.223 | 0 | 0.129 | 0.128 | 0.13  |
| map3k12  | 0.211 | 0 | 0 | 0 | 0 | 0 | 0.211 | 0 | 0.212 | 0 | 0.277 | 0.276 | 0.178 |
| arfgap3  | 0.181 | 0 | 0 | 0 | 0 | 0 | 0.181 | 0 | 0.186 | 0 | 0.116 | 0.115 | 0.134 |
| utp23    | 0.149 | 0 | 0 | 0 | 0 | 0 | 0.149 | 0 | 0.147 | 0 | 0.143 | 0.142 | 0.109 |

|          |       |   |   |   |   |   |       |   |       |   |       |       |       |
|----------|-------|---|---|---|---|---|-------|---|-------|---|-------|-------|-------|
| potef    | 0.149 | 0 | 0 | 0 | 0 | 0 | 0.149 | 0 | 0.15  | 0 | 0.217 | 0.216 | 0.149 |
| nup155   | 0.151 | 0 | 0 | 0 | 0 | 0 | 0.151 | 0 | 0.151 | 0 | 0.169 | 0.169 | 0.11  |
| mrpl28   | 0.153 | 0 | 0 | 0 | 0 | 0 | 0.153 | 0 | 0.15  | 0 | 0.192 | 0.192 | 0.107 |
| phpt1    | 0.125 | 0 | 0 | 0 | 0 | 0 | 0.125 | 0 | 0.127 | 0 | 0.12  | 0.118 | 0.136 |
| grasp    | 0.147 | 0 | 0 | 0 | 0 | 0 | 0.147 | 0 | 0.147 | 0 | 0.123 | 0.122 | 0.113 |
| rps20    | 0.145 | 0 | 0 | 0 | 0 | 0 | 0.145 | 0 | 0.145 | 0 | 0.186 | 0.186 | 0.107 |
| igk      | 0.126 | 0 | 0 | 0 | 0 | 0 | 0.126 | 0 | 0.129 | 0 | 0.143 | 0.143 | 0.144 |
| mrgprx4  | 0.146 | 0 | 0 | 0 | 0 | 0 | 0.146 | 0 | 0.142 | 0 | 0.227 | 0.227 | 0.306 |
| bcar4    | 0.146 | 0 | 0 | 0 | 0 | 0 | 0.146 | 0 | 0.141 | 0 | 0.116 | 0.115 | 0.131 |
| rpsap11  | 0.154 | 0 | 0 | 0 | 0 | 0 | 0.154 | 0 | 0.153 | 0 | 0.226 | 0.226 | 0.121 |
| trmt12   | 0.154 | 0 | 0 | 0 | 0 | 0 | 0.154 | 0 | 0.158 | 0 | 0.234 | 0.234 | 0.143 |
| arhgap6  | 0.157 | 0 | 0 | 0 | 0 | 0 | 0.157 | 0 | 0.161 | 0 | 0.17  | 0.17  | 0.122 |
| gtse1    | 0.158 | 0 | 0 | 0 | 0 | 0 | 0.158 | 0 | 0.155 | 0 | 0.209 | 0.209 | 0.125 |
| ccdc148  | 0.158 | 0 | 0 | 0 | 0 | 0 | 0.158 | 0 | 0.188 | 0 | 0.183 | 0.183 | 0.15  |
| shd      | 0.159 | 0 | 0 | 0 | 0 | 0 | 0.159 | 0 | 0.164 | 0 | 0.131 | 0.129 | 0.123 |
| ppfia3   | 0.157 | 0 | 0 | 0 | 0 | 0 | 0.157 | 0 | 0.158 | 0 | 0.153 | 0.152 | 0.11  |
| dimt1    | 0.157 | 0 | 0 | 0 | 0 | 0 | 0.157 | 0 | 0.165 | 0 | 0.131 | 0.128 | 0.16  |
| hmgb1    | 0.154 | 0 | 0 | 0 | 0 | 0 | 0.154 | 0 | 0.161 | 0 | 0.158 | 0.157 | 0.124 |
| ctbp1    | 0.154 | 0 | 0 | 0 | 0 | 0 | 0.154 | 0 | 0.156 | 0 | 0.223 | 0.222 | 0.157 |
| c16orf70 | 0.155 | 0 | 0 | 0 | 0 | 0 | 0.155 | 0 | 0.158 | 0 | 0.121 | 0.119 | 0.282 |
| dock6    | 0.145 | 0 | 0 | 0 | 0 | 0 | 0.145 | 0 | 0.145 | 0 | 0.131 | 0.13  | 0.103 |
| itsn2    | 0.144 | 0 | 0 | 0 | 0 | 0 | 0.144 | 0 | 0.144 | 0 | 0.322 | 0.321 | 0.246 |
| ppp1r3f  | 0.135 | 0 | 0 | 0 | 0 | 0 | 0.135 | 0 | 0.133 | 0 | 0.367 | 0.367 | 0.222 |
| bbip1    | 0.135 | 0 | 0 | 0 | 0 | 0 | 0.135 | 0 | 0.151 | 0 | 0.106 | 0.105 | 0.132 |
| depdc5   | 0.13  | 0 | 0 | 0 | 0 | 0 | 0.13  | 0 | 0.14  | 0 | 0.217 | 0.217 | 0.113 |
| tmprss13 | 0.136 | 0 | 0 | 0 | 0 | 0 | 0.136 | 0 | 0.133 | 0 | 0.187 | 0.187 | 0.101 |
| stat5b   | 0.134 | 0 | 0 | 0 | 0 | 0 | 0.134 | 0 | 0.133 | 0 | 0.207 | 0.205 | 0.174 |
| ankrd44  | 0.13  | 0 | 0 | 0 | 0 | 0 | 0.13  | 0 | 0.13  | 0 | 0.115 | 0.113 | 0.15  |
| ccdc88b  | 0.132 | 0 | 0 | 0 | 0 | 0 | 0.132 | 0 | 0.14  | 0 | 0.167 | 0.166 | 0.141 |
| elf3     | 0.132 | 0 | 0 | 0 | 0 | 0 | 0.132 | 0 | 0.131 | 0 | 0.207 | 0.206 | 0.129 |
| znf81    | 0.133 | 0 | 0 | 0 | 0 | 0 | 0.133 | 0 | 0.134 | 0 | 0.323 | 0.323 | 0.196 |
| gpr137   | 0.133 | 0 | 0 | 0 | 0 | 0 | 0.133 | 0 | 0.14  | 0 | 0.219 | 0.219 | 0.137 |
| cdc42ep2 | 0.136 | 0 | 0 | 0 | 0 | 0 | 0.136 | 0 | 0.137 | 0 | 0.174 | 0.174 | 0.134 |
| ddhd2    | 0.137 | 0 | 0 | 0 | 0 | 0 | 0.137 | 0 | 0.142 | 0 | 0.146 | 0.144 | 0.12  |
| snx9     | 0.128 | 0 | 0 | 0 | 0 | 0 | 0.128 | 0 | 0.131 | 0 | 0.149 | 0.147 | 0.111 |
| syn1     | 0.127 | 0 | 0 | 0 | 0 | 0 | 0.127 | 0 | 0.131 | 0 | 0.198 | 0.197 | 0.132 |
| heatr6   | 0.142 | 0 | 0 | 0 | 0 | 0 | 0.142 | 0 | 0.144 | 0 | 0.192 | 0.191 | 0.114 |
| dact2    | 0.126 | 0 | 0 | 0 | 0 | 0 | 0.126 | 0 | 0.124 | 0 | 0.133 | 0.133 | 0.136 |
| gcc2     | 0.141 | 0 | 0 | 0 | 0 | 0 | 0.141 | 0 | 0.149 | 0 | 0.104 | 0.103 | 0.146 |
| rab9b    | 0.14  | 0 | 0 | 0 | 0 | 0 | 0.14  | 0 | 0.145 | 0 | 0.113 | 0.111 | 0.114 |
| arfrp1   | 0.137 | 0 | 0 | 0 | 0 | 0 | 0.137 | 0 | 0.142 | 0 | 0.116 | 0.116 | 0.107 |

|          |       |   |   |   |   |   |       |   |       |   |       |       |       |
|----------|-------|---|---|---|---|---|-------|---|-------|---|-------|-------|-------|
| arhgap1  | 0.139 | 0 | 0 | 0 | 0 | 0 | 0.139 | 0 | 0.141 | 0 | 0.279 | 0.279 | 0.2   |
| fam50a   | 0.128 | 0 | 0 | 0 | 0 | 0 | 0.128 | 0 | 0.135 | 0 | 0.195 | 0.194 | 0.134 |
| she      | 0.159 | 0 | 0 | 0 | 0 | 0 | 0.159 | 0 | 0.164 | 0 | 0.131 | 0.129 | 0.123 |
| arf4     | 0.16  | 0 | 0 | 0 | 0 | 0 | 0.16  | 0 | 0.165 | 0 | 0.122 | 0.122 | 0.117 |
| exoc6    | 0.177 | 0 | 0 | 0 | 0 | 0 | 0.177 | 0 | 0.175 | 0 | 0.197 | 0.197 | 0.132 |
| rab26    | 0.178 | 0 | 0 | 0 | 0 | 0 | 0.178 | 0 | 0.179 | 0 | 0.11  | 0.109 | 0.114 |
| iqsec1   | 0.179 | 0 | 0 | 0 | 0 | 0 | 0.179 | 0 | 0.18  | 0 | 0.132 | 0.131 | 0.109 |
| ap1s2    | 0.18  | 0 | 0 | 0 | 0 | 0 | 0.18  | 0 | 0.186 | 0 | 0.195 | 0.194 | 0.141 |
| nol10    | 0.12  | 0 | 0 | 0 | 0 | 0 | 0.12  | 0 | 0.123 | 0 | 0.205 | 0.205 | 0.112 |
| fam101b  | 0.176 | 0 | 0 | 0 | 0 | 0 | 0.176 | 0 | 0.172 | 0 | 0.185 | 0.185 | 0.102 |
| dynll1   | 0.175 | 0 | 0 | 0 | 0 | 0 | 0.175 | 0 | 0.172 | 0 | 0.235 | 0.234 | 0.143 |
| sh3pxd2b | 0.175 | 0 | 0 | 0 | 0 | 0 | 0.175 | 0 | 0.175 | 0 | 0.162 | 0.16  | 0.164 |
| igfn1    | 0.176 | 0 | 0 | 0 | 0 | 0 | 0.176 | 0 | 0.173 | 0 | 0.109 | 0.108 | 0.19  |
| gmip     | 0.176 | 0 | 0 | 0 | 0 | 0 | 0.176 | 0 | 0.18  | 0 | 0.201 | 0.201 | 0.122 |
| pstpip1  | 0.181 | 0 | 0 | 0 | 0 | 0 | 0.181 | 0 | 0.183 | 0 | 0.193 | 0.191 | 0.22  |
| was      | 0.25  | 0 | 0 | 0 | 0 | 0 | 0.25  | 0 | 0.25  | 0 | 0.443 | 0.442 | 0.293 |
| ephb1    | 0.185 | 0 | 0 | 0 | 0 | 0 | 0.185 | 0 | 0.185 | 0 | 0.139 | 0.138 | 0.146 |
| cnksr3   | 0.185 | 0 | 0 | 0 | 0 | 0 | 0.185 | 0 | 0.185 | 0 | 0.224 | 0.224 | 0.139 |
| eif1ax   | 0.185 | 0 | 0 | 0 | 0 | 0 | 0.185 | 0 | 0.183 | 0 | 0.192 | 0.191 | 0.111 |
| rap2a    | 0.186 | 0 | 0 | 0 | 0 | 0 | 0.186 | 0 | 0.19  | 0 | 0.136 | 0.135 | 0.157 |
| pwp1     | 0.183 | 0 | 0 | 0 | 0 | 0 | 0.183 | 0 | 0.18  | 0 | 0.17  | 0.168 | 0.264 |
| c11orf30 | 0.183 | 0 | 0 | 0 | 0 | 0 | 0.183 | 0 | 0.181 | 0 | 0.282 | 0.282 | 0.156 |
| gpkow    | 0.119 | 0 | 0 | 0 | 0 | 0 | 0.119 | 0 | 0.116 | 0 | 0.296 | 0.295 | 0.17  |
| pdcd10   | 0.182 | 0 | 0 | 0 | 0 | 0 | 0.182 | 0 | 0.19  | 0 | 0.185 | 0.184 | 0.118 |
| capza1   | 0.119 | 0 | 0 | 0 | 0 | 0 | 0.119 | 0 | 0.117 | 0 | 0.135 | 0.134 | 0.134 |
| tanc2    | 0.175 | 0 | 0 | 0 | 0 | 0 | 0.175 | 0 | 0.175 | 0 | 0.208 | 0.208 | 0.102 |
| anks1a   | 0.174 | 0 | 0 | 0 | 0 | 0 | 0.174 | 0 | 0.176 | 0 | 0.102 | 0.101 | 0.468 |
| tmod1    | 0.161 | 0 | 0 | 0 | 0 | 0 | 0.161 | 0 | 0.164 | 0 | 0.144 | 0.143 | 0.107 |
| ttl4     | 0.162 | 0 | 0 | 0 | 0 | 0 | 0.162 | 0 | 0.158 | 0 | 0.221 | 0.22  | 0.147 |
| tceal3   | 0.164 | 0 | 0 | 0 | 0 | 0 | 0.164 | 0 | 0.168 | 0 | 0.144 | 0.143 | 0.201 |
| hmgb1    | 0.164 | 0 | 0 | 0 | 0 | 0 | 0.164 | 0 | 0.162 | 0 | 0.222 | 0.222 | 0.14  |
| reps2    | 0.161 | 0 | 0 | 0 | 0 | 0 | 0.161 | 0 | 0.165 | 0 | 0.111 | 0.11  | 0.114 |
| ptpn20a  | 0.161 | 0 | 0 | 0 | 0 | 0 | 0.161 | 0 | 0.165 | 0 | 0.139 | 0.136 | 0.113 |
| bad      | 0.16  | 0 | 0 | 0 | 0 | 0 | 0.16  | 0 | 0.158 | 0 | 0.226 | 0.225 | 0.159 |
| cd2ap    | 0.16  | 0 | 0 | 0 | 0 | 0 | 0.16  | 0 | 0.164 | 0 | 0.109 | 0.107 | 0.479 |
| tnik     | 0.16  | 0 | 0 | 0 | 0 | 0 | 0.16  | 0 | 0.156 | 0 | 0.192 | 0.191 | 0.175 |
| vps13a   | 0.165 | 0 | 0 | 0 | 0 | 0 | 0.165 | 0 | 0.168 | 0 | 0.192 | 0.192 | 0.12  |
| ap1s1    | 0.166 | 0 | 0 | 0 | 0 | 0 | 0.166 | 0 | 0.168 | 0 | 0.165 | 0.164 | 0.118 |
| clasp2   | 0.172 | 0 | 0 | 0 | 0 | 0 | 0.172 | 0 | 0.172 | 0 | 0.187 | 0.186 | 0.112 |
| limk2    | 0.172 | 0 | 0 | 0 | 0 | 0 | 0.172 | 0 | 0.17  | 0 | 0.181 | 0.18  | 0.116 |
| ephb6    | 0.173 | 0 | 0 | 0 | 0 | 0 | 0.173 | 0 | 0.175 | 0 | 0.101 | 0.1   | 0.433 |

|          |       |   |   |   |   |   |       |   |       |   |       |       |       |
|----------|-------|---|---|---|---|---|-------|---|-------|---|-------|-------|-------|
| ttl6     | 0.174 | 0 | 0 | 0 | 0 | 0 | 0.174 | 0 | 0.169 | 0 | 0.229 | 0.228 | 0.158 |
| dennd1b  | 0.171 | 0 | 0 | 0 | 0 | 0 | 0.171 | 0 | 0.175 | 0 | 0.116 | 0.115 | 0.104 |
| eps8     | 0.171 | 0 | 0 | 0 | 0 | 0 | 0.171 | 0 | 0.176 | 0 | 0.126 | 0.124 | 0.126 |
| stk4     | 0.166 | 0 | 0 | 0 | 0 | 0 | 0.166 | 0 | 0.165 | 0 | 0.167 | 0.165 | 0.107 |
| finc     | 0.169 | 0 | 0 | 0 | 0 | 0 | 0.169 | 0 | 0.17  | 0 | 0.158 | 0.157 | 0.121 |
| snx33    | 0.17  | 0 | 0 | 0 | 0 | 0 | 0.17  | 0 | 0.171 | 0 | 0.191 | 0.189 | 0.158 |
| pgam4    | 0.119 | 0 | 0 | 0 | 0 | 0 | 0.119 | 0 | 0.121 | 0 | 0.176 | 0.176 | 0.127 |
| dolk     | 0.196 | 0 | 0 | 0 | 0 | 0 | 0.196 | 0 | 0.197 | 0 | 0.291 | 0.291 | 0.176 |
| ctnbl1   | 0.548 | 0 | 0 | 0 | 0 | 0 | 0.548 | 0 | 0.54  | 0 | 0.763 | 0.763 | 0.413 |
| stk25    | 0.322 | 0 | 0 | 0 | 0 | 0 | 0.322 | 0 | 0.32  | 0 | 0.465 | 0.464 | 0.267 |
| wipf2    | 0.326 | 0 | 0 | 0 | 0 | 0 | 0.326 | 0 | 0.328 | 0 | 0.394 | 0.394 | 0.241 |
| cyth4    | 0.327 | 0 | 0 | 0 | 0 | 0 | 0.327 | 0 | 0.328 | 0 | 0.302 | 0.3   | 0.176 |
| sh3gl1p2 | 0.322 | 0 | 0 | 0 | 0 | 0 | 0.322 | 0 | 0.321 | 0 | 0.349 | 0.347 | 0.296 |
| sh3gl1p3 | 0.322 | 0 | 0 | 0 | 0 | 0 | 0.322 | 0 | 0.321 | 0 | 0.349 | 0.347 | 0.296 |
| parvb    | 0.561 | 0 | 0 | 0 | 0 | 0 | 0.561 | 0 | 0.556 | 0 | 0.457 | 0.456 | 0.291 |
| arfp1    | 0.317 | 0 | 0 | 0 | 0 | 0 | 0.317 | 0 | 0.322 | 0 | 0.283 | 0.281 | 0.164 |
| cdhr4    | 0.32  | 0 | 0 | 0 | 0 | 0 | 0.32  | 0 | 0.316 | 0 | 0.228 | 0.227 | 0.201 |
| sh3gl1p1 | 0.322 | 0 | 0 | 0 | 0 | 0 | 0.322 | 0 | 0.321 | 0 | 0.349 | 0.347 | 0.296 |
| dnajc27  | 0.328 | 0 | 0 | 0 | 0 | 0 | 0.328 | 0 | 0.325 | 0 | 0.377 | 0.375 | 0.265 |
| sh3rf3   | 0.332 | 0 | 0 | 0 | 0 | 0 | 0.332 | 0 | 0.331 | 0 | 0.206 | 0.206 | 0.13  |
| limk1    | 0.336 | 0 | 0 | 0 | 0 | 0 | 0.336 | 0 | 0.33  | 0 | 0.382 | 0.381 | 0.206 |
| asap2    | 0.536 | 0 | 0 | 0 | 0 | 0 | 0.536 | 0 | 0.534 | 0 | 0.514 | 0.512 | 0.474 |
| sorbs2   | 0.534 | 0 | 0 | 0 | 0 | 0 | 0.534 | 0 | 0.526 | 0 | 0.639 | 0.637 | 0.695 |
| rlnl     | 0.343 | 0 | 0 | 0 | 0 | 0 | 0.343 | 0 | 0.342 | 0 | 0.139 | 0.138 | 0.255 |
| wasf1    | 0.54  | 0 | 0 | 0 | 0 | 0 | 0.54  | 0 | 0.536 | 0 | 0.49  | 0.489 | 0.279 |
| asap1    | 0.335 | 0 | 0 | 0 | 0 | 0 | 0.335 | 0 | 0.337 | 0 | 0.271 | 0.269 | 0.44  |
| arf1     | 0.334 | 0 | 0 | 0 | 0 | 0 | 0.334 | 0 | 0.351 | 0 | 0.178 | 0.177 | 0.12  |
| cttn     | 0.334 | 0 | 0 | 0 | 0 | 0 | 0.334 | 0 | 0.342 | 0 | 0.254 | 0.253 | 0.152 |
| mxr80    | 0.545 | 0 | 0 | 0 | 0 | 0 | 0.545 | 0 | 0.539 | 0 | 0.687 | 0.687 | 0.369 |
| arf5     | 0.574 | 0 | 0 | 0 | 0 | 0 | 0.574 | 0 | 0.573 | 0 | 0.407 | 0.406 | 0.303 |
| ankrd28  | 0.314 | 0 | 0 | 0 | 0 | 0 | 0.314 | 0 | 0.31  | 0 | 0.263 | 0.26  | 0.246 |
| actr2    | 0.298 | 0 | 0 | 0 | 0 | 0 | 0.298 | 0 | 0.3   | 0 | 0.306 | 0.305 | 0.21  |
| ssh1     | 0.299 | 0 | 0 | 0 | 0 | 0 | 0.299 | 0 | 0.305 | 0 | 0.207 | 0.206 | 0.109 |
| nck2     | 0.606 | 0 | 0 | 0 | 0 | 0 | 0.606 | 0 | 0.601 | 0 | 0.589 | 0.587 | 0.325 |
| ptk2b    | 0.302 | 0 | 0 | 0 | 0 | 0 | 0.302 | 0 | 0.3   | 0 | 0.183 | 0.18  | 0.165 |
| capn5    | 0.297 | 0 | 0 | 0 | 0 | 0 | 0.297 | 0 | 0.293 | 0 | 0.397 | 0.397 | 0.231 |
| kalrn    | 0.296 | 0 | 0 | 0 | 0 | 0 | 0.296 | 0 | 0.294 | 0 | 0.217 | 0.216 | 0.121 |
| ptpn12   | 0.293 | 0 | 0 | 0 | 0 | 0 | 0.293 | 0 | 0.292 | 0 | 0.197 | 0.194 | 0.148 |
| parva    | 0.609 | 0 | 0 | 0 | 0 | 0 | 0.609 | 0 | 0.601 | 0 | 0.656 | 0.654 | 0.4   |
| lrrc15   | 0.293 | 0 | 0 | 0 | 0 | 0 | 0.293 | 0 | 0.29  | 0 | 0.425 | 0.425 | 0.288 |
| baiap2   | 0.296 | 0 | 0 | 0 | 0 | 0 | 0.296 | 0 | 0.296 | 0 | 0.191 | 0.19  | 0.129 |

|          |       |   |   |   |   |   |       |   |       |   |       |       |       |
|----------|-------|---|---|---|---|---|-------|---|-------|---|-------|-------|-------|
| rltpr    | 0.303 | 0 | 0 | 0 | 0 | 0 | 0.303 | 0 | 0.308 | 0 | 0.122 | 0.121 | 0.121 |
| net1     | 0.304 | 0 | 0 | 0 | 0 | 0 | 0.304 | 0 | 0.307 | 0 | 0.332 | 0.331 | 0.212 |
| sorbs1   | 0.309 | 0 | 0 | 0 | 0 | 0 | 0.309 | 0 | 0.309 | 0 | 0.265 | 0.263 | 0.521 |
| nck1     | 0.577 | 0 | 0 | 0 | 0 | 0 | 0.577 | 0 | 0.571 | 0 | 0.639 | 0.636 | 0.447 |
| pxn      | 0.576 | 0 | 0 | 0 | 0 | 0 | 0.576 | 0 | 0.57  | 0 | 0.529 | 0.527 | 0.372 |
| actr3    | 0.308 | 0 | 0 | 0 | 0 | 0 | 0.308 | 0 | 0.31  | 0 | 0.287 | 0.286 | 0.192 |
| wasf2    | 0.588 | 0 | 0 | 0 | 0 | 0 | 0.588 | 0 | 0.583 | 0 | 0.454 | 0.452 | 0.257 |
| arpc3    | 0.304 | 0 | 0 | 0 | 0 | 0 | 0.304 | 0 | 0.312 | 0 | 0.278 | 0.276 | 0.164 |
| map3k19  | 0.603 | 0 | 0 | 0 | 0 | 0 | 0.603 | 0 | 0.591 | 0 | 0.893 | 0.892 | 0.482 |
| ipcef1   | 0.306 | 0 | 0 | 0 | 0 | 0 | 0.306 | 0 | 0.308 | 0 | 0.252 | 0.25  | 0.171 |
| pgam1    | 0.343 | 0 | 0 | 0 | 0 | 0 | 0.343 | 0 | 0.336 | 0 | 0.497 | 0.497 | 0.278 |
| racgap1  | 0.344 | 0 | 0 | 0 | 0 | 0 | 0.344 | 0 | 0.346 | 0 | 0.224 | 0.223 | 0.129 |
| tesk2    | 0.497 | 0 | 0 | 0 | 0 | 0 | 0.497 | 0 | 0.49  | 0 | 0.545 | 0.544 | 0.307 |
| pak4     | 0.491 | 0 | 0 | 0 | 0 | 0 | 0.491 | 0 | 0.486 | 0 | 0.666 | 0.665 | 0.384 |
| brsk2    | 0.49  | 0 | 0 | 0 | 0 | 0 | 0.49  | 0 | 0.483 | 0 | 0.714 | 0.713 | 0.379 |
| ajuba    | 0.489 | 0 | 0 | 0 | 0 | 0 | 0.489 | 0 | 0.483 | 0 | 0.626 | 0.625 | 0.34  |
| rhou     | 0.497 | 0 | 0 | 0 | 0 | 0 | 0.497 | 0 | 0.493 | 0 | 0.696 | 0.695 | 0.373 |
| tesk1    | 0.407 | 0 | 0 | 0 | 0 | 0 | 0.407 | 0 | 0.404 | 0 | 0.468 | 0.466 | 0.271 |
| snord15b | 0.399 | 0 | 0 | 0 | 0 | 0 | 0.399 | 0 | 0.393 | 0 | 0.573 | 0.573 | 0.319 |
| lims2    | 0.404 | 0 | 0 | 0 | 0 | 0 | 0.404 | 0 | 0.402 | 0 | 0.447 | 0.447 | 0.244 |
| lmod2    | 0.406 | 0 | 0 | 0 | 0 | 0 | 0.406 | 0 | 0.401 | 0 | 0.528 | 0.528 | 0.301 |
| elmod3   | 0.504 | 0 | 0 | 0 | 0 | 0 | 0.504 | 0 | 0.506 | 0 | 0.194 | 0.194 | 0.116 |
| ppm1e    | 0.411 | 0 | 0 | 0 | 0 | 0 | 0.411 | 0 | 0.405 | 0 | 0.584 | 0.582 | 0.327 |
| arhgap8  | 0.412 | 0 | 0 | 0 | 0 | 0 | 0.412 | 0 | 0.411 | 0 | 0.452 | 0.451 | 0.302 |
| cdk11a   | 0.421 | 0 | 0 | 0 | 0 | 0 | 0.421 | 0 | 0.415 | 0 | 0.599 | 0.598 | 0.364 |
| cdc42bpa | 0.422 | 0 | 0 | 0 | 0 | 0 | 0.422 | 0 | 0.417 | 0 | 0.558 | 0.558 | 0.344 |
| cdk11b   | 0.427 | 0 | 0 | 0 | 0 | 0 | 0.427 | 0 | 0.421 | 0 | 0.602 | 0.601 | 0.418 |
| arf6     | 0.442 | 0 | 0 | 0 | 0 | 0 | 0.442 | 0 | 0.443 | 0 | 0.26  | 0.259 | 0.164 |
| ilk      | 0.468 | 0 | 0 | 0 | 0 | 0 | 0.468 | 0 | 0.463 | 0 | 0.49  | 0.488 | 0.275 |
| tbcb     | 0.471 | 0 | 0 | 0 | 0 | 0 | 0.471 | 0 | 0.464 | 0 | 0.662 | 0.661 | 0.373 |
| abi3     | 0.487 | 0 | 0 | 0 | 0 | 0 | 0.487 | 0 | 0.482 | 0 | 0.464 | 0.462 | 0.286 |
| tgfb1i1  | 0.412 | 0 | 0 | 0 | 0 | 0 | 0.412 | 0 | 0.409 | 0 | 0.377 | 0.376 | 0.259 |
| lims1    | 0.475 | 0 | 0 | 0 | 0 | 0 | 0.475 | 0 | 0.471 | 0 | 0.482 | 0.48  | 0.291 |
| ssh2     | 0.396 | 0 | 0 | 0 | 0 | 0 | 0.396 | 0 | 0.398 | 0 | 0.206 | 0.205 | 0.109 |
| synj2    | 0.394 | 0 | 0 | 0 | 0 | 0 | 0.394 | 0 | 0.388 | 0 | 0.318 | 0.317 | 0.266 |
| crk      | 0.359 | 0 | 0 | 0 | 0 | 0 | 0.359 | 0 | 0.356 | 0 | 0.217 | 0.214 | 0.422 |
| lurap1   | 0.359 | 0 | 0 | 0 | 0 | 0 | 0.359 | 0 | 0.358 | 0 | 0.45  | 0.45  | 0.278 |
| mrx31    | 0.528 | 0 | 0 | 0 | 0 | 0 | 0.528 | 0 | 0.523 | 0 | 0.801 | 0.801 | 0.448 |
| snord15a | 0.523 | 0 | 0 | 0 | 0 | 0 | 0.523 | 0 | 0.513 | 0 | 0.76  | 0.759 | 0.413 |
| arhgap30 | 0.529 | 0 | 0 | 0 | 0 | 0 | 0.529 | 0 | 0.523 | 0 | 0.456 | 0.455 | 0.241 |
| vcl      | 0.358 | 0 | 0 | 0 | 0 | 0 | 0.358 | 0 | 0.366 | 0 | 0.261 | 0.259 | 0.223 |

|          |       |   |   |   |   |   |       |   |       |   |       |       |       |
|----------|-------|---|---|---|---|---|-------|---|-------|---|-------|-------|-------|
| ppfia1   | 0.346 | 0 | 0 | 0 | 0 | 0 | 0.346 | 0 | 0.342 | 0 | 0.419 | 0.418 | 0.237 |
| ssh3     | 0.348 | 0 | 0 | 0 | 0 | 0 | 0.348 | 0 | 0.355 | 0 | 0.305 | 0.304 | 0.156 |
| bcar1    | 0.35  | 0 | 0 | 0 | 0 | 0 | 0.35  | 0 | 0.346 | 0 | 0.194 | 0.192 | 0.229 |
| arhgap27 | 0.356 | 0 | 0 | 0 | 0 | 0 | 0.356 | 0 | 0.352 | 0 | 0.335 | 0.335 | 0.232 |
| cdc42bpb | 0.361 | 0 | 0 | 0 | 0 | 0 | 0.361 | 0 | 0.358 | 0 | 0.591 | 0.591 | 0.354 |
| rs124d1  | 0.365 | 0 | 0 | 0 | 0 | 0 | 0.365 | 0 | 0.367 | 0 | 0.49  | 0.49  | 0.281 |
| mink1    | 0.377 | 0 | 0 | 0 | 0 | 0 | 0.377 | 0 | 0.372 | 0 | 0.513 | 0.512 | 0.303 |
| hepacam2 | 0.519 | 0 | 0 | 0 | 0 | 0 | 0.519 | 0 | 0.512 | 0 | 0.745 | 0.744 | 0.444 |
| pak7     | 0.385 | 0 | 0 | 0 | 0 | 0 | 0.385 | 0 | 0.383 | 0 | 0.594 | 0.593 | 0.383 |
| pak6     | 0.385 | 0 | 0 | 0 | 0 | 0 | 0.385 | 0 | 0.38  | 0 | 0.549 | 0.549 | 0.309 |
| ccdc53   | 0.106 | 0 | 0 | 0 | 0 | 0 | 0.106 | 0 | 0.107 | 0 | 0.104 | 0.102 | 0.12  |
| parvg    | 0.375 | 0 | 0 | 0 | 0 | 0 | 0.375 | 0 | 0.37  | 0 | 0.37  | 0.369 | 0.221 |
| myo18a   | 0.37  | 0 | 0 | 0 | 0 | 0 | 0.37  | 0 | 0.372 | 0 | 0.17  | 0.169 | 0.117 |
| map4k4   | 0.37  | 0 | 0 | 0 | 0 | 0 | 0.37  | 0 | 0.363 | 0 | 0.498 | 0.497 | 0.311 |
| rtkn     | 0.37  | 0 | 0 | 0 | 0 | 0 | 0.37  | 0 | 0.367 | 0 | 0.497 | 0.496 | 0.277 |
| cyth2    | 0.291 | 0 | 0 | 0 | 0 | 0 | 0.291 | 0 | 0.294 | 0 | 0.178 | 0.176 | 0.116 |
| bcar3    | 0.317 | 0 | 0 | 0 | 0 | 0 | 0.317 | 0 | 0.311 | 0 | 0.187 | 0.185 | 0.231 |
| cripak   | 0.623 | 0 | 0 | 0 | 0 | 0 | 0.623 | 0 | 0.611 | 0 | 0.909 | 0.909 | 0.487 |
| pitpnm3  | 0.279 | 0 | 0 | 0 | 0 | 0 | 0.279 | 0 | 0.278 | 0 | 0.214 | 0.213 | 0.188 |
| lpxn     | 0.278 | 0 | 0 | 0 | 0 | 0 | 0.278 | 0 | 0.274 | 0 | 0.197 | 0.195 | 0.158 |
| mtss1    | 0.265 | 0 | 0 | 0 | 0 | 0 | 0.265 | 0 | 0.268 | 0 | 0.16  | 0.159 | 0.12  |
| git1     | 0.644 | 0 | 0 | 0 | 0 | 0 | 0.644 | 0 | 0.639 | 0 | 0.703 | 0.702 | 0.411 |
| cald1    | 0.266 | 0 | 0 | 0 | 0 | 0 | 0.266 | 0 | 0.27  | 0 | 0.386 | 0.384 | 0.217 |
| exoc1    | 0.257 | 0 | 0 | 0 | 0 | 0 | 0.257 | 0 | 0.257 | 0 | 0.35  | 0.35  | 0.218 |
| arhgap15 | 0.666 | 0 | 0 | 0 | 0 | 0 | 0.666 | 0 | 0.66  | 0 | 0.702 | 0.702 | 0.392 |
| sorbs3   | 0.263 | 0 | 0 | 0 | 0 | 0 | 0.263 | 0 | 0.271 | 0 | 0.198 | 0.195 | 0.263 |
| dbnl     | 0.282 | 0 | 0 | 0 | 0 | 0 | 0.282 | 0 | 0.281 | 0 | 0.234 | 0.232 | 0.258 |
| arhgap32 | 0.257 | 0 | 0 | 0 | 0 | 0 | 0.257 | 0 | 0.26  | 0 | 0.192 | 0.191 | 0.136 |
| elmo1    | 0.623 | 0 | 0 | 0 | 0 | 0 | 0.623 | 0 | 0.616 | 0 | 0.229 | 0.228 | 0.133 |
| rhov     | 0.667 | 0 | 0 | 0 | 0 | 0 | 0.667 | 0 | 0.654 | 0 | 0.902 | 0.901 | 0.506 |
| cdc42se2 | 0.277 | 0 | 0 | 0 | 0 | 0 | 0.277 | 0 | 0.275 | 0 | 0.165 | 0.165 | 0.123 |
| pak3     | 0.665 | 0 | 0 | 0 | 0 | 0 | 0.665 | 0 | 0.655 | 0 | 0.925 | 0.924 | 0.524 |
| arhgef6  | 0.724 | 0 | 0 | 0 | 0 | 0 | 0.724 | 0 | 0.712 | 0 | 0.884 | 0.884 | 0.531 |
| git2     | 0.798 | 0 | 0 | 0 | 0 | 0 | 0.798 | 0 | 0.786 | 0 | 0.896 | 0.896 | 0.531 |
| nisch    | 0.271 | 0 | 0 | 0 | 0 | 0 | 0.271 | 0 | 0.267 | 0 | 0.232 | 0.232 | 0.135 |
| fam21c   | 0.255 | 0 | 0 | 0 | 0 | 0 | 0.255 | 0 | 0.253 | 0 | 0.187 | 0.186 | 0.184 |
| wasf3    | 0.276 | 0 | 0 | 0 | 0 | 0 | 0.276 | 0 | 0.275 | 0 | 0.213 | 0.212 | 0.105 |
| cdc42bpg | 0.27  | 0 | 0 | 0 | 0 | 0 | 0.27  | 0 | 0.27  | 0 | 0.228 | 0.228 | 0.14  |
| scrib    | 0.254 | 0 | 0 | 0 | 0 | 0 | 0.254 | 0 | 0.263 | 0 | 0.277 | 0.276 | 0.178 |
| arpc5    | 0.266 | 0 | 0 | 0 | 0 | 0 | 0.266 | 0 | 0.264 | 0 | 0.226 | 0.224 | 0.162 |
| exoc2    | 0.276 | 0 | 0 | 0 | 0 | 0 | 0.276 | 0 | 0.276 | 0 | 0.28  | 0.28  | 0.193 |

|           |       |      |   |       |       |   |       |      |       |       |       |       |       |
|-----------|-------|------|---|-------|-------|---|-------|------|-------|-------|-------|-------|-------|
| elmo2     | 0.654 | 0    | 0 | 0     | 0     | 0 | 0.654 | 0    | 0.647 | 0     | 0.543 | 0.542 | 0.329 |
| wipf1     | 0.253 | 0    | 0 | 0     | 0     | 0 | 0.253 | 0    | 0.255 | 0     | 0.382 | 0.38  | 0.26  |
| arhgap42  | 0.257 | 0    | 0 | 0     | 0     | 0 | 0.257 | 0    | 0.264 | 0     | 0.283 | 0.282 | 0.163 |
| cyth3     | 0.262 | 0    | 0 | 0     | 0     | 0 | 0.262 | 0    | 0.266 | 0     | 0.198 | 0.197 | 0.204 |
| vav1      | 0.265 | 0    | 0 | 0     | 0     | 0 | 0.265 | 0    | 0.263 | 0     | 0.133 | 0.131 | 0.18  |
| hip1r     | 0.252 | 0    | 0 | 0     | 0     | 0 | 0.252 | 0    | 0.255 | 0     | 0.256 | 0.256 | 0.26  |
| dock1     | 0.686 | 0    | 0 | 0     | 0     | 0 | 0.686 | 0    | 0.678 | 0     | 0.298 | 0.297 | 0.189 |
| slk       | 0.289 | 0    | 0 | 0     | 0     | 0 | 0.289 | 0    | 0.288 | 0     | 0.375 | 0.372 | 0.217 |
| arhgef26  | 0.283 | 0    | 0 | 0     | 0     | 0 | 0.283 | 0    | 0.29  | 0     | 0.133 | 0.132 | 0.16  |
| c17orf62  | 0.252 | 0    | 0 | 0     | 0     | 0 | 0.252 | 0    | 0.252 | 0     | 0.346 | 0.345 | 0.213 |
| nedd9     | 0.26  | 0    | 0 | 0     | 0     | 0 | 0.26  | 0    | 0.258 | 0     | 0.144 | 0.141 | 0.254 |
| snx21     | 0.261 | 0    | 0 | 0     | 0     | 0 | 0.261 | 0    | 0.262 | 0     | 0.127 | 0.125 | 0.118 |
| wash1     | 0.285 | 0    | 0 | 0     | 0     | 0 | 0.285 | 0    | 0.284 | 0     | 0.204 | 0.203 | 0.145 |
| pak2      | 0.669 | 0    | 0 | 0     | 0     | 0 | 0.669 | 0    | 0.659 | 0     | 0.911 | 0.91  | 0.516 |
| dennd1c   | 0.285 | 0    | 0 | 0     | 0     | 0 | 0.285 | 0    | 0.283 | 0     | 0.143 | 0.142 | 0.115 |
| map4k1    | 0.26  | 0    | 0 | 0     | 0     | 0 | 0.26  | 0    | 0.262 | 0     | 0.236 | 0.234 | 0.243 |
| nckipd    | 0.285 | 0    | 0 | 0     | 0     | 0 | 0.285 | 0    | 0.282 | 0     | 0.253 | 0.251 | 0.159 |
| mrx27     | 0.258 | 0    | 0 | 0     | 0     | 0 | 0.258 | 0    | 0.255 | 0     | 0.319 | 0.318 | 0.203 |
| rab11fip3 | 0.258 | 0    | 0 | 0     | 0     | 0 | 0.258 | 0    | 0.255 | 0     | 0.209 | 0.208 | 0.152 |
| pak1ip1   | 0.623 | 0    | 0 | 0     | 0     | 0 | 0.623 | 0    | 0.613 | 0     | 0.941 | 0.94  | 0.517 |
| rhoq      | 0.261 | 0    | 0 | 0     | 0     | 0 | 0.261 | 0    | 0.262 | 0     | 0.321 | 0.32  | 0.256 |
| pak1      | 0.696 | 0    | 0 | 0     | 0     | 0 | 0.696 | 0    | 0.685 | 0     | 0.961 | 0.961 | 0.523 |
| rimklb    | 0     | 0    | 0 | 0.159 | 0.159 | 0 | 0     | 0    | 0     | 0.159 | 0.111 | 0.111 | 0.132 |
| marcks    | 0.21  | 0.21 | 0 | 0.133 | 0.133 | 0 | 0.21  | 0.21 | 0     | 0.133 | 0     | 0     | 0     |
| gng5p1    | 0.109 | 0    | 0 | 0.126 | 0.126 | 0 | 0.109 | 0    | 0.108 | 0.126 | 0     | 0     | 0     |
| kncn      | 0.11  | 0    | 0 | 0.116 | 0.116 | 0 | 0.11  | 0    | 0.125 | 0.116 | 0     | 0     | 0     |
| rgs19     | 0.108 | 0    | 0 | 0.21  | 0.21  | 0 | 0.108 | 0    | 0.108 | 0.21  | 0     | 0     | 0     |
| dgkg      | 0.373 | 0    | 0 | 0.131 | 0.131 | 0 | 0.373 | 0    | 0.371 | 0.131 | 0     | 0     | 0     |
| gngt2     | 0.12  | 0    | 0 | 0.116 | 0.116 | 0 | 0.12  | 0    | 0.121 | 0.116 | 0     | 0     | 0     |
| yme1l1    | 0.12  | 0    | 0 | 0.11  | 0.11  | 0 | 0.12  | 0    | 0.121 | 0.11  | 0     | 0     | 0     |
| dgkb      | 0.126 | 0    | 0 | 0.118 | 0.118 | 0 | 0.126 | 0    | 0.141 | 0.118 | 0     | 0     | 0     |
| akap12    | 0.113 | 0    | 0 | 0.165 | 0.165 | 0 | 0.113 | 0    | 0.12  | 0.165 | 0     | 0     | 0     |
| rab11b    | 0.13  | 0    | 0 | 0.114 | 0.114 | 0 | 0.13  | 0    | 0.135 | 0.114 | 0     | 0     | 0     |
| vps26b    | 0.101 | 0    | 0 | 0.119 | 0.119 | 0 | 0.101 | 0    | 0.103 | 0.119 | 0     | 0     | 0     |
| myo1a     | 0.105 | 0    | 0 | 0.133 | 0.133 | 0 | 0.105 | 0    | 0.113 | 0.133 | 0     | 0     | 0     |
| tuba4a    | 0.17  | 0    | 0 | 0.11  | 0.11  | 0 | 0.17  | 0    | 0.173 | 0.11  | 0     | 0     | 0     |
| gnb5      | 0.152 | 0    | 0 | 0.106 | 0.106 | 0 | 0.152 | 0    | 0.153 | 0.106 | 0     | 0     | 0     |
| ocm       | 0.176 | 0    | 0 | 0.111 | 0.111 | 0 | 0.176 | 0    | 0.178 | 0.111 | 0     | 0     | 0     |
| tbc1d14   | 0.126 | 0    | 0 | 0.139 | 0.139 | 0 | 0.126 | 0    | 0.136 | 0.139 | 0     | 0     | 0     |
| rap1b     | 0.135 | 0    | 0 | 0.181 | 0.181 | 0 | 0.135 | 0    | 0.139 | 0.181 | 0     | 0     | 0     |
| sigmar1   | 0.112 | 0    | 0 | 0.123 | 0.123 | 0 | 0.112 | 0    | 0.11  | 0.123 | 0     | 0     | 0     |

|          |       |   |       |       |       |       |       |   |       |       |       |       |       |
|----------|-------|---|-------|-------|-------|-------|-------|---|-------|-------|-------|-------|-------|
| arpc5l   | 0.136 | 0 | 0     | 0.187 | 0.187 | 0     | 0.136 | 0 | 0.134 | 0.187 | 0     | 0     | 0     |
| magt1    | 0.102 | 0 | 0     | 0.142 | 0.142 | 0     | 0.102 | 0 | 0.103 | 0.142 | 0     | 0     | 0     |
| snx6     | 0.115 | 0 | 0     | 0.104 | 0.104 | 0     | 0.115 | 0 | 0.118 | 0.104 | 0     | 0     | 0     |
| pi4kb    | 0.128 | 0 | 0     | 0.111 | 0.111 | 0     | 0.128 | 0 | 0.13  | 0.111 | 0     | 0     | 0     |
| ralb     | 0.222 | 0 | 0     | 0.108 | 0.108 | 0     | 0.222 | 0 | 0.226 | 0.108 | 0     | 0     | 0     |
| otogl    | 0.117 | 0 | 0     | 0.106 | 0.106 | 0     | 0.117 | 0 | 0.128 | 0.106 | 0     | 0     | 0     |
| nfatc3   | 0.11  | 0 | 0     | 0.129 | 0.129 | 0     | 0.11  | 0 | 0.11  | 0.129 | 0     | 0     | 0     |
| rngtt    | 0.122 | 0 | 0     | 0.139 | 0.139 | 0     | 0.122 | 0 | 0.119 | 0.139 | 0     | 0     | 0     |
| myo6     | 0.106 | 0 | 0     | 0.113 | 0.113 | 0     | 0.106 | 0 | 0.112 | 0.113 | 0     | 0     | 0     |
| cnn3     | 0.14  | 0 | 0     | 0.234 | 0.234 | 0     | 0.14  | 0 | 0.153 | 0.234 | 0     | 0     | 0     |
| sergef   | 0.159 | 0 | 0     | 0.104 | 0.104 | 0     | 0.159 | 0 | 0.162 | 0.104 | 0     | 0     | 0     |
| itpka    | 0.106 | 0 | 0     | 0.212 | 0.212 | 0     | 0.106 | 0 | 0.108 | 0.212 | 0     | 0     | 0     |
| lrrc16b  | 0.139 | 0 | 0     | 0.124 | 0.124 | 0     | 0.139 | 0 | 0.143 | 0.124 | 0     | 0     | 0     |
| rgs7     | 0.137 | 0 | 0     | 0.168 | 0.168 | 0     | 0.137 | 0 | 0.138 | 0.168 | 0     | 0     | 0     |
| dgke     | 0.105 | 0 | 0     | 0.129 | 0.129 | 0     | 0.105 | 0 | 0.11  | 0.129 | 0     | 0     | 0     |
| pgam2    | 0     | 0 | 0     | 0.112 | 0.112 | 0     | 0     | 0 | 0.132 | 0.112 | 0.132 | 0.131 | 0     |
| bin3     | 0.305 | 0 | 0     | 0     | 0     | 0     | 0.305 | 0 | 0.307 | 0     | 0.114 | 0.113 | 0.103 |
| clip1    | 0.144 | 0 | 0     | 0     | 0     | 0     | 0.144 | 0 | 0.147 | 0     | 0.123 | 0.121 | 0.1   |
| mir132   | 0.148 | 0 | 0     | 0     | 0     | 0     | 0.148 | 0 | 0.145 | 0     | 0.144 | 0.143 | 0.103 |
| vav3     | 0.299 | 0 | 0     | 0     | 0     | 0     | 0.299 | 0 | 0.3   | 0     | 0.115 | 0.114 | 0.101 |
| ankmy2   | 0.125 | 0 | 0     | 0     | 0     | 0     | 0.125 | 0 | 0.122 | 0     | 0.142 | 0.142 | 0.101 |
| dbn1     | 0.173 | 0 | 0     | 0     | 0     | 0     | 0.173 | 0 | 0.2   | 0     | 0.123 | 0.122 | 0.103 |
| apbb1ip  | 0.163 | 0 | 0     | 0     | 0     | 0     | 0.163 | 0 | 0.162 | 0     | 0.138 | 0.137 | 0.101 |
| brsk1    | 0.198 | 0 | 0     | 0     | 0     | 0     | 0.198 | 0 | 0.197 | 0     | 0.201 | 0.199 | 0.104 |
| tbc1d20  | 0.106 | 0 | 0.148 | 0     | 0     | 0.148 | 0.106 | 0 | 0.111 | 0     | 0     | 0     | 0     |
| nip7     | 0.122 | 0 | 0.117 | 0     | 0     | 0.117 | 0.122 | 0 | 0.133 | 0     | 0     | 0     | 0     |
| zfx4     | 0     | 0 | 0.126 | 0.209 | 0.209 | 0.126 | 0     | 0 | 0     | 0.209 | 0     | 0     | 0     |
| nkrf     | 0     | 0 | 0.161 | 0.168 | 0.168 | 0.161 | 0     | 0 | 0     | 0.168 | 0     | 0     | 0     |
| gls      | 0     | 0 | 0.189 | 0.16  | 0.16  | 0.189 | 0     | 0 | 0     | 0.16  | 0     | 0     | 0     |
| serpinb7 | 0     | 0 | 0.142 | 0.124 | 0.124 | 0.142 | 0     | 0 | 0     | 0.124 | 0     | 0     | 0     |
| minos1   | 0     | 0 | 0.202 | 0.237 | 0.237 | 0.202 | 0     | 0 | 0     | 0.237 | 0     | 0     | 0     |
| lrrc37b  | 0     | 0 | 0.115 | 0.121 | 0.121 | 0.115 | 0     | 0 | 0     | 0.121 | 0     | 0     | 0     |
| pnma3    | 0     | 0 | 0.209 | 0.105 | 0.105 | 0.209 | 0     | 0 | 0     | 0.105 | 0     | 0     | 0     |
| dhrs4l2  | 0     | 0 | 0.135 | 0.167 | 0.167 | 0.135 | 0     | 0 | 0     | 0.167 | 0     | 0     | 0     |
| pde2a    | 0     | 0 | 0.168 | 0.206 | 0.206 | 0.168 | 0     | 0 | 0     | 0.206 | 0     | 0     | 0     |
| bivm     | 0     | 0 | 0.196 | 0.235 | 0.235 | 0.196 | 0     | 0 | 0     | 0.235 | 0     | 0     | 0     |
| hcvs     | 0     | 0 | 0.142 | 0.106 | 0.106 | 0.142 | 0     | 0 | 0     | 0.106 | 0     | 0     | 0     |
| xage2b   | 0     | 0 | 0.169 | 0.24  | 0.24  | 0.169 | 0     | 0 | 0     | 0.24  | 0     | 0     | 0     |
| camta1   | 0     | 0 | 0.203 | 0.16  | 0.16  | 0.203 | 0     | 0 | 0     | 0.16  | 0     | 0     | 0     |
| oas2     | 0     | 0 | 0.123 | 0.161 | 0.161 | 0.123 | 0     | 0 | 0     | 0.161 | 0     | 0     | 0     |
| suox     | 0     | 0 | 0.213 | 0.263 | 0.263 | 0.213 | 0     | 0 | 0     | 0.263 | 0     | 0     | 0     |

|          |   |   |       |       |       |       |   |   |   |       |   |   |   |
|----------|---|---|-------|-------|-------|-------|---|---|---|-------|---|---|---|
| rassf10  | 0 | 0 | 0.211 | 0.105 | 0.105 | 0.211 | 0 | 0 | 0 | 0.105 | 0 | 0 | 0 |
| tefm     | 0 | 0 | 0.121 | 0.124 | 0.124 | 0.121 | 0 | 0 | 0 | 0.124 | 0 | 0 | 0 |
| ddah2    | 0 | 0 | 0.239 | 0.2   | 0.2   | 0.239 | 0 | 0 | 0 | 0.2   | 0 | 0 | 0 |
| amt      | 0 | 0 | 0.158 | 0.215 | 0.215 | 0.158 | 0 | 0 | 0 | 0.215 | 0 | 0 | 0 |
| aldh18a1 | 0 | 0 | 0.13  | 0.165 | 0.165 | 0.13  | 0 | 0 | 0 | 0.165 | 0 | 0 | 0 |
| page3    | 0 | 0 | 0.217 | 0.258 | 0.258 | 0.217 | 0 | 0 | 0 | 0.258 | 0 | 0 | 0 |
| page1    | 0 | 0 | 0.217 | 0.258 | 0.258 | 0.217 | 0 | 0 | 0 | 0.258 | 0 | 0 | 0 |
| gatm     | 0 | 0 | 0.127 | 0.164 | 0.164 | 0.127 | 0 | 0 | 0 | 0.164 | 0 | 0 | 0 |
| mir602   | 0 | 0 | 0.195 | 0.201 | 0.201 | 0.195 | 0 | 0 | 0 | 0.201 | 0 | 0 | 0 |
| hsps13   | 0 | 0 | 0.11  | 0.203 | 0.203 | 0.11  | 0 | 0 | 0 | 0.203 | 0 | 0 | 0 |
| cyp4b1   | 0 | 0 | 0.103 | 0.124 | 0.124 | 0.103 | 0 | 0 | 0 | 0.124 | 0 | 0 | 0 |
| hnrnp1   | 0 | 0 | 0.131 | 0.202 | 0.202 | 0.131 | 0 | 0 | 0 | 0.202 | 0 | 0 | 0 |
| cdo1     | 0 | 0 | 0.205 | 0.211 | 0.211 | 0.205 | 0 | 0 | 0 | 0.211 | 0 | 0 | 0 |
| coq10b   | 0 | 0 | 0.145 | 0.199 | 0.199 | 0.145 | 0 | 0 | 0 | 0.199 | 0 | 0 | 0 |
| bcat2    | 0 | 0 | 0.138 | 0.202 | 0.202 | 0.138 | 0 | 0 | 0 | 0.202 | 0 | 0 | 0 |
| gucy1a2  | 0 | 0 | 0.168 | 0.164 | 0.164 | 0.168 | 0 | 0 | 0 | 0.164 | 0 | 0 | 0 |
| got1     | 0 | 0 | 0.132 | 0.163 | 0.163 | 0.132 | 0 | 0 | 0 | 0.163 | 0 | 0 | 0 |
| mthfd2   | 0 | 0 | 0.102 | 0.1   | 0.1   | 0.102 | 0 | 0 | 0 | 0.1   | 0 | 0 | 0 |
| idh3g    | 0 | 0 | 0.286 | 0.24  | 0.24  | 0.286 | 0 | 0 | 0 | 0.24  | 0 | 0 | 0 |
| trnq     | 0 | 0 | 0.26  | 0.242 | 0.242 | 0.26  | 0 | 0 | 0 | 0.242 | 0 | 0 | 0 |
| slc30a6  | 0 | 0 | 0.13  | 0.203 | 0.203 | 0.13  | 0 | 0 | 0 | 0.203 | 0 | 0 | 0 |
| xage3    | 0 | 0 | 0.169 | 0.24  | 0.24  | 0.169 | 0 | 0 | 0 | 0.24  | 0 | 0 | 0 |
| fam57a   | 0 | 0 | 0.109 | 0.166 | 0.166 | 0.109 | 0 | 0 | 0 | 0.166 | 0 | 0 | 0 |
| xage2    | 0 | 0 | 0.169 | 0.24  | 0.24  | 0.169 | 0 | 0 | 0 | 0.24  | 0 | 0 | 0 |
| b4galnt4 | 0 | 0 | 0.129 | 0.105 | 0.105 | 0.129 | 0 | 0 | 0 | 0.105 | 0 | 0 | 0 |
| idh3a    | 0 | 0 | 0.251 | 0.245 | 0.245 | 0.251 | 0 | 0 | 0 | 0.245 | 0 | 0 | 0 |
| coq9     | 0 | 0 | 0.1   | 0.162 | 0.162 | 0.1   | 0 | 0 | 0 | 0.162 | 0 | 0 | 0 |
| page2    | 0 | 0 | 0.217 | 0.258 | 0.258 | 0.217 | 0 | 0 | 0 | 0.258 | 0 | 0 | 0 |
| crat     | 0 | 0 | 0.112 | 0.161 | 0.161 | 0.112 | 0 | 0 | 0 | 0.161 | 0 | 0 | 0 |
| pyroxd2  | 0 | 0 | 0.132 | 0.161 | 0.161 | 0.132 | 0 | 0 | 0 | 0.161 | 0 | 0 | 0 |
| vps51    | 0 | 0 | 0.167 | 0.249 | 0.249 | 0.167 | 0 | 0 | 0 | 0.249 | 0 | 0 | 0 |
| tm7sf3   | 0 | 0 | 0.153 | 0.209 | 0.209 | 0.153 | 0 | 0 | 0 | 0.209 | 0 | 0 | 0 |
| nadk2    | 0 | 0 | 0.211 | 0.123 | 0.123 | 0.211 | 0 | 0 | 0 | 0.123 | 0 | 0 | 0 |
| slc7a3   | 0 | 0 | 0.105 | 0.176 | 0.176 | 0.105 | 0 | 0 | 0 | 0.176 | 0 | 0 | 0 |
| usf2     | 0 | 0 | 0.151 | 0.186 | 0.186 | 0.151 | 0 | 0 | 0 | 0.186 | 0 | 0 | 0 |
| rps25    | 0 | 0 | 0.159 | 0.176 | 0.176 | 0.159 | 0 | 0 | 0 | 0.176 | 0 | 0 | 0 |
| hyalp1   | 0 | 0 | 0.14  | 0.177 | 0.177 | 0.14  | 0 | 0 | 0 | 0.177 | 0 | 0 | 0 |
| cpb1     | 0 | 0 | 0.173 | 0.219 | 0.219 | 0.173 | 0 | 0 | 0 | 0.219 | 0 | 0 | 0 |
| l2hgdh   | 0 | 0 | 0.316 | 0.177 | 0.177 | 0.316 | 0 | 0 | 0 | 0.177 | 0 | 0 | 0 |
| mir661   | 0 | 0 | 0.156 | 0.177 | 0.177 | 0.156 | 0 | 0 | 0 | 0.177 | 0 | 0 | 0 |
| iscu     | 0 | 0 | 0.14  | 0.219 | 0.219 | 0.14  | 0 | 0 | 0 | 0.219 | 0 | 0 | 0 |

|          |   |   |       |       |       |       |   |   |   |       |   |   |   |
|----------|---|---|-------|-------|-------|-------|---|---|---|-------|---|---|---|
| dpep2    | 0 | 0 | 0.16  | 0.224 | 0.224 | 0.16  | 0 | 0 | 0 | 0.224 | 0 | 0 | 0 |
| mocs3    | 0 | 0 | 0.141 | 0.189 | 0.189 | 0.141 | 0 | 0 | 0 | 0.189 | 0 | 0 | 0 |
| klf6     | 0 | 0 | 0.163 | 0.174 | 0.174 | 0.163 | 0 | 0 | 0 | 0.174 | 0 | 0 | 0 |
| clic3    | 0 | 0 | 0.17  | 0.225 | 0.225 | 0.17  | 0 | 0 | 0 | 0.225 | 0 | 0 | 0 |
| cyp20a1  | 0 | 0 | 0.267 | 0.263 | 0.263 | 0.267 | 0 | 0 | 0 | 0.263 | 0 | 0 | 0 |
| mdh1     | 0 | 0 | 0.189 | 0.188 | 0.188 | 0.189 | 0 | 0 | 0 | 0.188 | 0 | 0 | 0 |
| cyb561d2 | 0 | 0 | 0.119 | 0.174 | 0.174 | 0.119 | 0 | 0 | 0 | 0.174 | 0 | 0 | 0 |
| ehf      | 0 | 0 | 0.149 | 0.174 | 0.174 | 0.149 | 0 | 0 | 0 | 0.174 | 0 | 0 | 0 |
| krt17p2  | 0 | 0 | 0.139 | 0.223 | 0.223 | 0.139 | 0 | 0 | 0 | 0.223 | 0 | 0 | 0 |
| krt17p1  | 0 | 0 | 0.139 | 0.223 | 0.223 | 0.139 | 0 | 0 | 0 | 0.223 | 0 | 0 | 0 |
| kynu     | 0 | 0 | 0.11  | 0.181 | 0.181 | 0.11  | 0 | 0 | 0 | 0.181 | 0 | 0 | 0 |
| marc2    | 0 | 0 | 0.182 | 0.222 | 0.222 | 0.182 | 0 | 0 | 0 | 0.222 | 0 | 0 | 0 |
| aox1     | 0 | 0 | 0.277 | 0.18  | 0.18  | 0.277 | 0 | 0 | 0 | 0.18  | 0 | 0 | 0 |
| ddah1    | 0 | 0 | 0.227 | 0.222 | 0.222 | 0.227 | 0 | 0 | 0 | 0.222 | 0 | 0 | 0 |
| gmps     | 0 | 0 | 0.128 | 0.181 | 0.181 | 0.128 | 0 | 0 | 0 | 0.181 | 0 | 0 | 0 |
| slc43a1  | 0 | 0 | 0.123 | 0.221 | 0.221 | 0.123 | 0 | 0 | 0 | 0.221 | 0 | 0 | 0 |
| sub1     | 0 | 0 | 0.157 | 0.181 | 0.181 | 0.157 | 0 | 0 | 0 | 0.181 | 0 | 0 | 0 |
| ndufb2   | 0 | 0 | 0.193 | 0.22  | 0.22  | 0.193 | 0 | 0 | 0 | 0.22  | 0 | 0 | 0 |
| vnn1     | 0 | 0 | 0.183 | 0.222 | 0.222 | 0.183 | 0 | 0 | 0 | 0.222 | 0 | 0 | 0 |
| idh3b    | 0 | 0 | 0.286 | 0.222 | 0.222 | 0.286 | 0 | 0 | 0 | 0.222 | 0 | 0 | 0 |
| esx1     | 0 | 0 | 0.124 | 0.178 | 0.178 | 0.124 | 0 | 0 | 0 | 0.178 | 0 | 0 | 0 |
| rars2    | 0 | 0 | 0.306 | 0.223 | 0.223 | 0.306 | 0 | 0 | 0 | 0.223 | 0 | 0 | 0 |
| slc3a2   | 0 | 0 | 0.104 | 0.184 | 0.184 | 0.104 | 0 | 0 | 0 | 0.184 | 0 | 0 | 0 |
| ctns     | 0 | 0 | 0.109 | 0.179 | 0.179 | 0.109 | 0 | 0 | 0 | 0.179 | 0 | 0 | 0 |
| ms       | 0 | 0 | 0.199 | 0.219 | 0.219 | 0.199 | 0 | 0 | 0 | 0.219 | 0 | 0 | 0 |
| galm     | 0 | 0 | 0.195 | 0.103 | 0.103 | 0.195 | 0 | 0 | 0 | 0.103 | 0 | 0 | 0 |
| ogdhl    | 0 | 0 | 0.103 | 0.189 | 0.189 | 0.103 | 0 | 0 | 0 | 0.189 | 0 | 0 | 0 |
| slc7a15p | 0 | 0 | 0.232 | 0.104 | 0.104 | 0.232 | 0 | 0 | 0 | 0.104 | 0 | 0 | 0 |
| arg2     | 0 | 0 | 0.21  | 0.232 | 0.232 | 0.21  | 0 | 0 | 0 | 0.232 | 0 | 0 | 0 |
| nd4l     | 0 | 0 | 0.176 | 0.216 | 0.216 | 0.176 | 0 | 0 | 0 | 0.216 | 0 | 0 | 0 |
| rasal1   | 0 | 0 | 0.193 | 0.216 | 0.216 | 0.193 | 0 | 0 | 0 | 0.216 | 0 | 0 | 0 |
| znf121   | 0 | 0 | 0.144 | 0.195 | 0.195 | 0.144 | 0 | 0 | 0 | 0.195 | 0 | 0 | 0 |
| ssav1    | 0 | 0 | 0.19  | 0.231 | 0.231 | 0.19  | 0 | 0 | 0 | 0.231 | 0 | 0 | 0 |
| taar2    | 0 | 0 | 0.169 | 0.181 | 0.181 | 0.169 | 0 | 0 | 0 | 0.181 | 0 | 0 | 0 |
| coq10a   | 0 | 0 | 0.159 | 0.169 | 0.169 | 0.159 | 0 | 0 | 0 | 0.169 | 0 | 0 | 0 |
| dhrs4l1  | 0 | 0 | 0.176 | 0.169 | 0.169 | 0.176 | 0 | 0 | 0 | 0.169 | 0 | 0 | 0 |
| mir1287  | 0 | 0 | 0.104 | 0.104 | 0.104 | 0.104 | 0 | 0 | 0 | 0.104 | 0 | 0 | 0 |
| gucy1a3  | 0 | 0 | 0.186 | 0.168 | 0.168 | 0.186 | 0 | 0 | 0 | 0.168 | 0 | 0 | 0 |
| spink2   | 0 | 0 | 0.172 | 0.198 | 0.198 | 0.172 | 0 | 0 | 0 | 0.198 | 0 | 0 | 0 |
| cd200    | 0 | 0 | 0.224 | 0.168 | 0.168 | 0.224 | 0 | 0 | 0 | 0.168 | 0 | 0 | 0 |
| marc1    | 0 | 0 | 0.147 | 0.169 | 0.169 | 0.147 | 0 | 0 | 0 | 0.169 | 0 | 0 | 0 |

|          |   |   |       |       |       |       |   |   |   |       |   |   |   |
|----------|---|---|-------|-------|-------|-------|---|---|---|-------|---|---|---|
| ass1     | 0 | 0 | 0.207 | 0.215 | 0.215 | 0.207 | 0 | 0 | 0 | 0.215 | 0 | 0 | 0 |
| odc1     | 0 | 0 | 0.153 | 0.233 | 0.233 | 0.153 | 0 | 0 | 0 | 0.233 | 0 | 0 | 0 |
| slc30a7  | 0 | 0 | 0.133 | 0.196 | 0.196 | 0.133 | 0 | 0 | 0 | 0.196 | 0 | 0 | 0 |
| epx      | 0 | 0 | 0.104 | 0.104 | 0.104 | 0.104 | 0 | 0 | 0 | 0.104 | 0 | 0 | 0 |
| coq6     | 0 | 0 | 0.117 | 0.218 | 0.218 | 0.117 | 0 | 0 | 0 | 0.218 | 0 | 0 | 0 |
| dhx30    | 0 | 0 | 0.148 | 0.229 | 0.229 | 0.148 | 0 | 0 | 0 | 0.229 | 0 | 0 | 0 |
| asl      | 0 | 0 | 0.129 | 0.23  | 0.23  | 0.129 | 0 | 0 | 0 | 0.23  | 0 | 0 | 0 |
| cps1     | 0 | 0 | 0.154 | 0.191 | 0.191 | 0.154 | 0 | 0 | 0 | 0.191 | 0 | 0 | 0 |
| gfm2     | 0 | 0 | 0.125 | 0.173 | 0.173 | 0.125 | 0 | 0 | 0 | 0.173 | 0 | 0 | 0 |
| dhodh    | 0 | 0 | 0.115 | 0.173 | 0.173 | 0.115 | 0 | 0 | 0 | 0.173 | 0 | 0 | 0 |
| gfm1     | 0 | 0 | 0.137 | 0.225 | 0.225 | 0.137 | 0 | 0 | 0 | 0.225 | 0 | 0 | 0 |
| dvt7     | 0 | 0 | 0.103 | 0.19  | 0.19  | 0.103 | 0 | 0 | 0 | 0.19  | 0 | 0 | 0 |
| c3orf52  | 0 | 0 | 0.314 | 0.172 | 0.172 | 0.314 | 0 | 0 | 0 | 0.172 | 0 | 0 | 0 |
| vnn3     | 0 | 0 | 0.14  | 0.231 | 0.231 | 0.14  | 0 | 0 | 0 | 0.231 | 0 | 0 | 0 |
| xdh      | 0 | 0 | 0.174 | 0.17  | 0.17  | 0.174 | 0 | 0 | 0 | 0.17  | 0 | 0 | 0 |
| d2hgdh   | 0 | 0 | 0.321 | 0.17  | 0.17  | 0.321 | 0 | 0 | 0 | 0.17  | 0 | 0 | 0 |
| tkt      | 0 | 0 | 0.171 | 0.193 | 0.193 | 0.171 | 0 | 0 | 0 | 0.193 | 0 | 0 | 0 |
| tsnax    | 0 | 0 | 0.127 | 0.172 | 0.172 | 0.127 | 0 | 0 | 0 | 0.172 | 0 | 0 | 0 |
| slc5a3   | 0 | 0 | 0.126 | 0.193 | 0.193 | 0.126 | 0 | 0 | 0 | 0.193 | 0 | 0 | 0 |
| hs3st3b1 | 0 | 0 | 0.128 | 0.172 | 0.172 | 0.128 | 0 | 0 | 0 | 0.172 | 0 | 0 | 0 |
| ahcy     | 0 | 0 | 0.127 | 0.192 | 0.192 | 0.127 | 0 | 0 | 0 | 0.192 | 0 | 0 | 0 |
| pc       | 0 | 0 | 0.133 | 0.168 | 0.168 | 0.133 | 0 | 0 | 0 | 0.168 | 0 | 0 | 0 |
| adh5     | 0 | 0 | 0.263 | 0.281 | 0.281 | 0.263 | 0 | 0 | 0 | 0.281 | 0 | 0 | 0 |
| nos2p2   | 0 | 0 | 0.383 | 0.399 | 0.399 | 0.383 | 0 | 0 | 0 | 0.399 | 0 | 0 | 0 |
| fam109b  | 0 | 0 | 0.107 | 0.127 | 0.127 | 0.107 | 0 | 0 | 0 | 0.127 | 0 | 0 | 0 |
| fam109a  | 0 | 0 | 0.107 | 0.127 | 0.127 | 0.107 | 0 | 0 | 0 | 0.127 | 0 | 0 | 0 |
| spsb1    | 0 | 0 | 0.372 | 0.402 | 0.402 | 0.372 | 0 | 0 | 0 | 0.402 | 0 | 0 | 0 |
| hao2     | 0 | 0 | 0.128 | 0.14  | 0.14  | 0.128 | 0 | 0 | 0 | 0.14  | 0 | 0 | 0 |
| tbxas1   | 0 | 0 | 0.107 | 0.111 | 0.111 | 0.107 | 0 | 0 | 0 | 0.111 | 0 | 0 | 0 |
| luzp4    | 0 | 0 | 0.175 | 0.14  | 0.14  | 0.175 | 0 | 0 | 0 | 0.14  | 0 | 0 | 0 |
| ppp1r14d | 0 | 0 | 0.101 | 0.39  | 0.39  | 0.101 | 0 | 0 | 0 | 0.39  | 0 | 0 | 0 |
| plac8    | 0 | 0 | 0.395 | 0.394 | 0.394 | 0.395 | 0 | 0 | 0 | 0.394 | 0 | 0 | 0 |
| nfs1     | 0 | 0 | 0.329 | 0.397 | 0.397 | 0.329 | 0 | 0 | 0 | 0.397 | 0 | 0 | 0 |
| arg1     | 0 | 0 | 0.365 | 0.436 | 0.436 | 0.365 | 0 | 0 | 0 | 0.436 | 0 | 0 | 0 |
| tbc1d23  | 0 | 0 | 0.438 | 0.442 | 0.442 | 0.438 | 0 | 0 | 0 | 0.442 | 0 | 0 | 0 |
| pnpla7   | 0 | 0 | 0.114 | 0.139 | 0.139 | 0.114 | 0 | 0 | 0 | 0.139 | 0 | 0 | 0 |
| ndufb4   | 0 | 0 | 0.134 | 0.138 | 0.138 | 0.134 | 0 | 0 | 0 | 0.138 | 0 | 0 | 0 |
| ngb      | 0 | 0 | 0.196 | 0.118 | 0.118 | 0.196 | 0 | 0 | 0 | 0.118 | 0 | 0 | 0 |
| mpst     | 0 | 0 | 0.117 | 0.118 | 0.118 | 0.117 | 0 | 0 | 0 | 0.118 | 0 | 0 | 0 |
| entpd5   | 0 | 0 | 0.112 | 0.483 | 0.483 | 0.112 | 0 | 0 | 0 | 0.483 | 0 | 0 | 0 |
| acaa2    | 0 | 0 | 0.121 | 0.474 | 0.474 | 0.121 | 0 | 0 | 0 | 0.474 | 0 | 0 | 0 |

|         |   |   |       |       |       |       |   |   |   |       |   |   |   |
|---------|---|---|-------|-------|-------|-------|---|---|---|-------|---|---|---|
| nos2p1  | 0 | 0 | 0.437 | 0.447 | 0.447 | 0.437 | 0 | 0 | 0 | 0.447 | 0 | 0 | 0 |
| rundc3b | 0 | 0 | 0.109 | 0.47  | 0.47  | 0.109 | 0 | 0 | 0 | 0.47  | 0 | 0 | 0 |
| msra    | 0 | 0 | 0.117 | 0.139 | 0.139 | 0.117 | 0 | 0 | 0 | 0.139 | 0 | 0 | 0 |
| acy3    | 0 | 0 | 0.128 | 0.141 | 0.141 | 0.128 | 0 | 0 | 0 | 0.141 | 0 | 0 | 0 |
| pgm3    | 0 | 0 | 0.172 | 0.141 | 0.141 | 0.172 | 0 | 0 | 0 | 0.141 | 0 | 0 | 0 |
| ldhb    | 0 | 0 | 0.131 | 0.144 | 0.144 | 0.131 | 0 | 0 | 0 | 0.144 | 0 | 0 | 0 |
| idh1    | 0 | 0 | 0.31  | 0.159 | 0.159 | 0.31  | 0 | 0 | 0 | 0.159 | 0 | 0 | 0 |
| mreg    | 0 | 0 | 0.195 | 0.144 | 0.144 | 0.195 | 0 | 0 | 0 | 0.144 | 0 | 0 | 0 |
| stk17a  | 0 | 0 | 0.121 | 0.11  | 0.11  | 0.121 | 0 | 0 | 0 | 0.11  | 0 | 0 | 0 |
| pgd     | 0 | 0 | 0.208 | 0.119 | 0.119 | 0.208 | 0 | 0 | 0 | 0.119 | 0 | 0 | 0 |
| ndufa12 | 0 | 0 | 0.116 | 0.145 | 0.145 | 0.116 | 0 | 0 | 0 | 0.145 | 0 | 0 | 0 |
| nnt     | 0 | 0 | 0.102 | 0.109 | 0.109 | 0.102 | 0 | 0 | 0 | 0.109 | 0 | 0 | 0 |
| aco2    | 0 | 0 | 0.145 | 0.145 | 0.145 | 0.145 | 0 | 0 | 0 | 0.145 | 0 | 0 | 0 |
| agxt2   | 0 | 0 | 0.108 | 0.145 | 0.145 | 0.108 | 0 | 0 | 0 | 0.145 | 0 | 0 | 0 |
| cd163   | 0 | 0 | 0.207 | 0.143 | 0.143 | 0.207 | 0 | 0 | 0 | 0.143 | 0 | 0 | 0 |
| snord13 | 0 | 0 | 0.107 | 0.11  | 0.11  | 0.107 | 0 | 0 | 0 | 0.11  | 0 | 0 | 0 |
| spsb2   | 0 | 0 | 0.351 | 0.384 | 0.384 | 0.351 | 0 | 0 | 0 | 0.384 | 0 | 0 | 0 |
| kprp    | 0 | 0 | 0.103 | 0.111 | 0.111 | 0.103 | 0 | 0 | 0 | 0.111 | 0 | 0 | 0 |
| hpx     | 0 | 0 | 0.292 | 0.141 | 0.141 | 0.292 | 0 | 0 | 0 | 0.141 | 0 | 0 | 0 |
| elk3    | 0 | 0 | 0.161 | 0.141 | 0.141 | 0.161 | 0 | 0 | 0 | 0.141 | 0 | 0 | 0 |
| tmem86b | 0 | 0 | 0.226 | 0.356 | 0.356 | 0.226 | 0 | 0 | 0 | 0.356 | 0 | 0 | 0 |
| nanos2  | 0 | 0 | 0.126 | 0.119 | 0.119 | 0.126 | 0 | 0 | 0 | 0.119 | 0 | 0 | 0 |
| slc11a1 | 0 | 0 | 0.176 | 0.142 | 0.142 | 0.176 | 0 | 0 | 0 | 0.142 | 0 | 0 | 0 |
| hgsnat  | 0 | 0 | 0.148 | 0.111 | 0.111 | 0.148 | 0 | 0 | 0 | 0.111 | 0 | 0 | 0 |
| irgm    | 0 | 0 | 0.329 | 0.343 | 0.343 | 0.329 | 0 | 0 | 0 | 0.343 | 0 | 0 | 0 |
| glud1p5 | 0 | 0 | 0.16  | 0.137 | 0.137 | 0.16  | 0 | 0 | 0 | 0.137 | 0 | 0 | 0 |
| prkca   | 0 | 0 | 0.114 | 0.483 | 0.483 | 0.114 | 0 | 0 | 0 | 0.483 | 0 | 0 | 0 |
| alkbh6  | 0 | 0 | 0.105 | 0.116 | 0.116 | 0.105 | 0 | 0 | 0 | 0.116 | 0 | 0 | 0 |
| mir5087 | 0 | 0 | 0.118 | 0.128 | 0.128 | 0.118 | 0 | 0 | 0 | 0.128 | 0 | 0 | 0 |
| bp9     | 0 | 0 | 0.116 | 0.116 | 0.116 | 0.116 | 0 | 0 | 0 | 0.116 | 0 | 0 | 0 |
| mir5094 | 0 | 0 | 0.118 | 0.128 | 0.128 | 0.118 | 0 | 0 | 0 | 0.128 | 0 | 0 | 0 |
| cpox    | 0 | 0 | 0.121 | 0.131 | 0.131 | 0.121 | 0 | 0 | 0 | 0.131 | 0 | 0 | 0 |
| soat1   | 0 | 0 | 0.114 | 0.115 | 0.115 | 0.114 | 0 | 0 | 0 | 0.115 | 0 | 0 | 0 |
| mir939  | 0 | 0 | 0.69  | 0.688 | 0.688 | 0.69  | 0 | 0 | 0 | 0.688 | 0 | 0 | 0 |
| hebp1   | 0 | 0 | 0.166 | 0.115 | 0.115 | 0.166 | 0 | 0 | 0 | 0.115 | 0 | 0 | 0 |
| gulop   | 0 | 0 | 0.126 | 0.115 | 0.115 | 0.126 | 0 | 0 | 0 | 0.115 | 0 | 0 | 0 |
| gls2    | 0 | 0 | 0.139 | 0.116 | 0.116 | 0.139 | 0 | 0 | 0 | 0.116 | 0 | 0 | 0 |
| cyp27a1 | 0 | 0 | 0.103 | 0.13  | 0.13  | 0.103 | 0 | 0 | 0 | 0.13  | 0 | 0 | 0 |
| mir5089 | 0 | 0 | 0.118 | 0.128 | 0.128 | 0.118 | 0 | 0 | 0 | 0.128 | 0 | 0 | 0 |
| mir5091 | 0 | 0 | 0.118 | 0.128 | 0.128 | 0.118 | 0 | 0 | 0 | 0.128 | 0 | 0 | 0 |
| mir4511 | 0 | 0 | 0.118 | 0.128 | 0.128 | 0.118 | 0 | 0 | 0 | 0.128 | 0 | 0 | 0 |

|         |   |   |       |       |       |       |   |   |   |       |   |   |   |
|---------|---|---|-------|-------|-------|-------|---|---|---|-------|---|---|---|
| mir5092 | 0 | 0 | 0.118 | 0.128 | 0.128 | 0.118 | 0 | 0 | 0 | 0.128 | 0 | 0 | 0 |
| mir5093 | 0 | 0 | 0.118 | 0.128 | 0.128 | 0.118 | 0 | 0 | 0 | 0.128 | 0 | 0 | 0 |
| iba57   | 0 | 0 | 0.159 | 0.117 | 0.117 | 0.159 | 0 | 0 | 0 | 0.117 | 0 | 0 | 0 |
| dhrs1   | 0 | 0 | 0.223 | 0.129 | 0.129 | 0.223 | 0 | 0 | 0 | 0.129 | 0 | 0 | 0 |
| alkbh2  | 0 | 0 | 0.251 | 0.129 | 0.129 | 0.251 | 0 | 0 | 0 | 0.129 | 0 | 0 | 0 |
| man2c1  | 0 | 0 | 0.132 | 0.116 | 0.116 | 0.132 | 0 | 0 | 0 | 0.116 | 0 | 0 | 0 |
| fubp1   | 0 | 0 | 0.133 | 0.132 | 0.132 | 0.133 | 0 | 0 | 0 | 0.132 | 0 | 0 | 0 |
| nos2    | 0 | 0 | 0.719 | 0.684 | 0.684 | 0.719 | 0 | 0 | 0 | 0.684 | 0 | 0 | 0 |
| ina     | 0 | 0 | 0.171 | 0.118 | 0.118 | 0.171 | 0 | 0 | 0 | 0.118 | 0 | 0 | 0 |
| acly    | 0 | 0 | 0.1   | 0.117 | 0.117 | 0.1   | 0 | 0 | 0 | 0.117 | 0 | 0 | 0 |
| kif1c   | 0 | 0 | 0.486 | 0.519 | 0.519 | 0.486 | 0 | 0 | 0 | 0.519 | 0 | 0 | 0 |
| tarm1   | 0 | 0 | 0.162 | 0.113 | 0.113 | 0.162 | 0 | 0 | 0 | 0.113 | 0 | 0 | 0 |
| bbox1   | 0 | 0 | 0.118 | 0.135 | 0.135 | 0.118 | 0 | 0 | 0 | 0.135 | 0 | 0 | 0 |
| nrn1l   | 0 | 0 | 0.126 | 0.51  | 0.51  | 0.126 | 0 | 0 | 0 | 0.51  | 0 | 0 | 0 |
| is2     | 0 | 0 | 0.446 | 0.505 | 0.505 | 0.446 | 0 | 0 | 0 | 0.505 | 0 | 0 | 0 |
| slc7a2  | 0 | 0 | 0.456 | 0.507 | 0.507 | 0.456 | 0 | 0 | 0 | 0.507 | 0 | 0 | 0 |
| oxct1   | 0 | 0 | 0.123 | 0.136 | 0.136 | 0.123 | 0 | 0 | 0 | 0.136 | 0 | 0 | 0 |
| sardh   | 0 | 0 | 0.106 | 0.135 | 0.135 | 0.106 | 0 | 0 | 0 | 0.135 | 0 | 0 | 0 |
| ptbp1p  | 0 | 0 | 0.581 | 0.616 | 0.616 | 0.581 | 0 | 0 | 0 | 0.616 | 0 | 0 | 0 |
| mir5088 | 0 | 0 | 0.118 | 0.128 | 0.128 | 0.118 | 0 | 0 | 0 | 0.128 | 0 | 0 | 0 |
| taldo1  | 0 | 0 | 0.101 | 0.133 | 0.133 | 0.101 | 0 | 0 | 0 | 0.133 | 0 | 0 | 0 |
| mlph    | 0 | 0 | 0.157 | 0.133 | 0.133 | 0.157 | 0 | 0 | 0 | 0.133 | 0 | 0 | 0 |
| bp15    | 0 | 0 | 0.642 | 0.656 | 0.656 | 0.642 | 0 | 0 | 0 | 0.656 | 0 | 0 | 0 |
| bp14    | 0 | 0 | 0.642 | 0.656 | 0.656 | 0.642 | 0 | 0 | 0 | 0.656 | 0 | 0 | 0 |
| glul    | 0 | 0 | 0.101 | 0.134 | 0.134 | 0.101 | 0 | 0 | 0 | 0.134 | 0 | 0 | 0 |
| acadl   | 0 | 0 | 0.106 | 0.117 | 0.117 | 0.106 | 0 | 0 | 0 | 0.117 | 0 | 0 | 0 |
| mir5090 | 0 | 0 | 0.118 | 0.128 | 0.128 | 0.118 | 0 | 0 | 0 | 0.128 | 0 | 0 | 0 |
| bp16    | 0 | 0 | 0.642 | 0.656 | 0.656 | 0.642 | 0 | 0 | 0 | 0.656 | 0 | 0 | 0 |
| spsb3   | 0 | 0 | 0.285 | 0.311 | 0.311 | 0.285 | 0 | 0 | 0 | 0.311 | 0 | 0 | 0 |
| pepc    | 0 | 0 | 0.25  | 0.144 | 0.144 | 0.25  | 0 | 0 | 0 | 0.144 | 0 | 0 | 0 |
| serinc1 | 0 | 0 | 0.221 | 0.271 | 0.271 | 0.221 | 0 | 0 | 0 | 0.271 | 0 | 0 | 0 |
| gsta4   | 0 | 0 | 0.111 | 0.108 | 0.108 | 0.111 | 0 | 0 | 0 | 0.108 | 0 | 0 | 0 |
| crygep  | 0 | 0 | 0.117 | 0.277 | 0.277 | 0.117 | 0 | 0 | 0 | 0.277 | 0 | 0 | 0 |
| acyp1   | 0 | 0 | 0.114 | 0.108 | 0.108 | 0.114 | 0 | 0 | 0 | 0.108 | 0 | 0 | 0 |
| h6pd    | 0 | 0 | 0.119 | 0.153 | 0.153 | 0.119 | 0 | 0 | 0 | 0.153 | 0 | 0 | 0 |
| psmc4   | 0 | 0 | 0.216 | 0.268 | 0.268 | 0.216 | 0 | 0 | 0 | 0.268 | 0 | 0 | 0 |
| psat1   | 0 | 0 | 0.11  | 0.153 | 0.153 | 0.11  | 0 | 0 | 0 | 0.153 | 0 | 0 | 0 |
| ct45a1  | 0 | 0 | 0.105 | 0.125 | 0.125 | 0.105 | 0 | 0 | 0 | 0.125 | 0 | 0 | 0 |
| adhfe1  | 0 | 0 | 0.119 | 0.108 | 0.108 | 0.119 | 0 | 0 | 0 | 0.108 | 0 | 0 | 0 |
| cyb5r4  | 0 | 0 | 0.104 | 0.12  | 0.12  | 0.104 | 0 | 0 | 0 | 0.12  | 0 | 0 | 0 |
| uqcrq   | 0 | 0 | 0.128 | 0.151 | 0.151 | 0.128 | 0 | 0 | 0 | 0.151 | 0 | 0 | 0 |

|               |   |   |       |       |       |       |   |   |   |       |   |   |   |
|---------------|---|---|-------|-------|-------|-------|---|---|---|-------|---|---|---|
| atp8          | 0 | 0 | 0.148 | 0.151 | 0.151 | 0.148 | 0 | 0 | 0 | 0.151 | 0 | 0 | 0 |
| dusp11        | 0 | 0 | 0.127 | 0.15  | 0.15  | 0.127 | 0 | 0 | 0 | 0.15  | 0 | 0 | 0 |
| rars          | 0 | 0 | 0.189 | 0.282 | 0.282 | 0.189 | 0 | 0 | 0 | 0.282 | 0 | 0 | 0 |
| gcdh          | 0 | 0 | 0.207 | 0.151 | 0.151 | 0.207 | 0 | 0 | 0 | 0.151 | 0 | 0 | 0 |
| smtn          | 0 | 0 | 0.103 | 0.119 | 0.119 | 0.103 | 0 | 0 | 0 | 0.119 | 0 | 0 | 0 |
| apopt1        | 0 | 0 | 0.115 | 0.119 | 0.119 | 0.115 | 0 | 0 | 0 | 0.119 | 0 | 0 | 0 |
| mbs3          | 0 | 0 | 0.1   | 0.146 | 0.146 | 0.1   | 0 | 0 | 0 | 0.146 | 0 | 0 | 0 |
| ndufa6        | 0 | 0 | 0.108 | 0.151 | 0.151 | 0.108 | 0 | 0 | 0 | 0.151 | 0 | 0 | 0 |
| gpx8          | 0 | 0 | 0.131 | 0.154 | 0.154 | 0.131 | 0 | 0 | 0 | 0.154 | 0 | 0 | 0 |
| rpl18         | 0 | 0 | 0.202 | 0.154 | 0.154 | 0.202 | 0 | 0 | 0 | 0.154 | 0 | 0 | 0 |
| spg19         | 0 | 0 | 0.113 | 0.12  | 0.12  | 0.113 | 0 | 0 | 0 | 0.12  | 0 | 0 | 0 |
| ct64          | 0 | 0 | 0.222 | 0.264 | 0.264 | 0.222 | 0 | 0 | 0 | 0.264 | 0 | 0 | 0 |
| ct62          | 0 | 0 | 0.222 | 0.264 | 0.264 | 0.222 | 0 | 0 | 0 | 0.264 | 0 | 0 | 0 |
| ct45a3        | 0 | 0 | 0.222 | 0.264 | 0.264 | 0.222 | 0 | 0 | 0 | 0.264 | 0 | 0 | 0 |
| ct60          | 0 | 0 | 0.222 | 0.264 | 0.264 | 0.222 | 0 | 0 | 0 | 0.264 | 0 | 0 | 0 |
| psph          | 0 | 0 | 0.11  | 0.121 | 0.121 | 0.11  | 0 | 0 | 0 | 0.121 | 0 | 0 | 0 |
| lyar          | 0 | 0 | 0.279 | 0.159 | 0.159 | 0.279 | 0 | 0 | 0 | 0.159 | 0 | 0 | 0 |
| cic           | 0 | 0 | 0.273 | 0.159 | 0.159 | 0.273 | 0 | 0 | 0 | 0.159 | 0 | 0 | 0 |
| ct45a6        | 0 | 0 | 0.222 | 0.264 | 0.264 | 0.222 | 0 | 0 | 0 | 0.264 | 0 | 0 | 0 |
| slx1a-sult1a3 | 0 | 0 | 0.131 | 0.159 | 0.159 | 0.131 | 0 | 0 | 0 | 0.159 | 0 | 0 | 0 |
| ct45a4        | 0 | 0 | 0.222 | 0.264 | 0.264 | 0.222 | 0 | 0 | 0 | 0.264 | 0 | 0 | 0 |
| ct45a5        | 0 | 0 | 0.222 | 0.264 | 0.264 | 0.222 | 0 | 0 | 0 | 0.264 | 0 | 0 | 0 |
| slc27a2       | 0 | 0 | 0.123 | 0.12  | 0.12  | 0.123 | 0 | 0 | 0 | 0.12  | 0 | 0 | 0 |
| ct45b1p       | 0 | 0 | 0.222 | 0.264 | 0.264 | 0.222 | 0 | 0 | 0 | 0.264 | 0 | 0 | 0 |
| csad          | 0 | 0 | 0.104 | 0.157 | 0.157 | 0.104 | 0 | 0 | 0 | 0.157 | 0 | 0 | 0 |
| tst           | 0 | 0 | 0.177 | 0.158 | 0.158 | 0.177 | 0 | 0 | 0 | 0.158 | 0 | 0 | 0 |
| tial1         | 0 | 0 | 0.103 | 0.158 | 0.158 | 0.103 | 0 | 0 | 0 | 0.158 | 0 | 0 | 0 |
| idh2          | 0 | 0 | 0.31  | 0.158 | 0.158 | 0.31  | 0 | 0 | 0 | 0.158 | 0 | 0 | 0 |
| sult1c2       | 0 | 0 | 0.112 | 0.108 | 0.108 | 0.112 | 0 | 0 | 0 | 0.108 | 0 | 0 | 0 |
| txnl4a        | 0 | 0 | 0.201 | 0.279 | 0.279 | 0.201 | 0 | 0 | 0 | 0.279 | 0 | 0 | 0 |
| tsnax-disc1   | 0 | 0 | 0.18  | 0.147 | 0.147 | 0.18  | 0 | 0 | 0 | 0.147 | 0 | 0 | 0 |
| me2           | 0 | 0 | 0.178 | 0.15  | 0.15  | 0.178 | 0 | 0 | 0 | 0.15  | 0 | 0 | 0 |
| crygd         | 0 | 0 | 0.11  | 0.296 | 0.296 | 0.11  | 0 | 0 | 0 | 0.296 | 0 | 0 | 0 |
| mir1275       | 0 | 0 | 0.17  | 0.148 | 0.148 | 0.17  | 0 | 0 | 0 | 0.148 | 0 | 0 | 0 |
| gucy1b3       | 0 | 0 | 0.177 | 0.148 | 0.148 | 0.177 | 0 | 0 | 0 | 0.148 | 0 | 0 | 0 |
| pde1b         | 0 | 0 | 0.113 | 0.148 | 0.148 | 0.113 | 0 | 0 | 0 | 0.148 | 0 | 0 | 0 |
| mtbs          | 0 | 0 | 0.16  | 0.109 | 0.109 | 0.16  | 0 | 0 | 0 | 0.109 | 0 | 0 | 0 |
| znf80         | 0 | 0 | 0.264 | 0.297 | 0.297 | 0.264 | 0 | 0 | 0 | 0.297 | 0 | 0 | 0 |
| lcn12         | 0 | 0 | 0.119 | 0.126 | 0.126 | 0.119 | 0 | 0 | 0 | 0.126 | 0 | 0 | 0 |
| ccb1l         | 0 | 0 | 0.102 | 0.146 | 0.146 | 0.102 | 0 | 0 | 0 | 0.146 | 0 | 0 | 0 |
| dlst          | 0 | 0 | 0.103 | 0.126 | 0.126 | 0.103 | 0 | 0 | 0 | 0.126 | 0 | 0 | 0 |

|           |       |   |       |       |       |       |       |   |       |       |       |       |   |
|-----------|-------|---|-------|-------|-------|-------|-------|---|-------|-------|-------|-------|---|
| pdss1     | 0     | 0 | 0.2   | 0.305 | 0.305 | 0.2   | 0     | 0 | 0     | 0.305 | 0     | 0     | 0 |
| renbp     | 0     | 0 | 0.117 | 0.109 | 0.109 | 0.117 | 0     | 0 | 0     | 0.109 | 0     | 0     | 0 |
| fech      | 0     | 0 | 0.241 | 0.147 | 0.147 | 0.241 | 0     | 0 | 0     | 0.147 | 0     | 0     | 0 |
| ptdss2    | 0     | 0 | 0.237 | 0.303 | 0.303 | 0.237 | 0     | 0 | 0     | 0.303 | 0     | 0     | 0 |
| csnp3     | 0     | 0 | 0.272 | 0.293 | 0.293 | 0.272 | 0     | 0 | 0     | 0.293 | 0     | 0     | 0 |
| cryga     | 0     | 0 | 0.239 | 0.295 | 0.295 | 0.239 | 0     | 0 | 0     | 0.295 | 0     | 0     | 0 |
| sdha      | 0     | 0 | 0.15  | 0.108 | 0.108 | 0.15  | 0     | 0 | 0     | 0.108 | 0     | 0     | 0 |
| me1       | 0     | 0 | 0.161 | 0.149 | 0.149 | 0.161 | 0     | 0 | 0     | 0.149 | 0     | 0     | 0 |
| slc7a1    | 0     | 0 | 0.157 | 0.289 | 0.289 | 0.157 | 0     | 0 | 0     | 0.289 | 0     | 0     | 0 |
| decr1     | 0     | 0 | 0.106 | 0.108 | 0.108 | 0.106 | 0     | 0 | 0     | 0.108 | 0     | 0     | 0 |
| usp34     | 0     | 0 | 0.123 | 0.149 | 0.149 | 0.123 | 0     | 0 | 0     | 0.149 | 0     | 0     | 0 |
| mb        | 0     | 0 | 0.123 | 0.149 | 0.149 | 0.123 | 0     | 0 | 0     | 0.149 | 0     | 0     | 0 |
| spsb4     | 0     | 0 | 0.25  | 0.283 | 0.283 | 0.25  | 0     | 0 | 0     | 0.283 | 0     | 0     | 0 |
| clint1    | 0.128 | 0 | 0     | 0     | 0     | 0     | 0.128 | 0 | 0.135 | 0     | 0.117 | 0.115 | 0 |
| igkv1d-17 | 0.107 | 0 | 0     | 0     | 0     | 0     | 0.107 | 0 | 0.11  | 0     | 0.113 | 0.112 | 0 |
| camk1     | 0.107 | 0 | 0     | 0     | 0     | 0     | 0.107 | 0 | 0.108 | 0     | 0.161 | 0.159 | 0 |
| nek6      | 0.12  | 0 | 0     | 0     | 0     | 0     | 0.12  | 0 | 0.12  | 0     | 0.119 | 0.117 | 0 |
| myl2      | 0.109 | 0 | 0     | 0     | 0     | 0     | 0.109 | 0 | 0.115 | 0     | 0.13  | 0.129 | 0 |
| map3k9    | 0.103 | 0 | 0     | 0     | 0     | 0     | 0.103 | 0 | 0.103 | 0     | 0.114 | 0.112 | 0 |
| mrx35     | 0.101 | 0 | 0     | 0     | 0     | 0     | 0.101 | 0 | 0.106 | 0     | 0.148 | 0.148 | 0 |
| ap1m1     | 0.101 | 0 | 0     | 0     | 0     | 0     | 0.101 | 0 | 0.105 | 0     | 0.108 | 0.107 | 0 |
| agbl5     | 0.106 | 0 | 0     | 0     | 0     | 0     | 0.106 | 0 | 0.104 | 0     | 0.133 | 0.133 | 0 |
| scarna6   | 0.109 | 0 | 0     | 0     | 0     | 0     | 0.109 | 0 | 0.115 | 0     | 0.102 | 0.101 | 0 |
| dstn      | 0.111 | 0 | 0     | 0     | 0     | 0     | 0.111 | 0 | 0.113 | 0     | 0.107 | 0.106 | 0 |
| mapre1    | 0.106 | 0 | 0     | 0     | 0     | 0     | 0.106 | 0 | 0.108 | 0     | 0.103 | 0.102 | 0 |
| casin1    | 0.123 | 0 | 0     | 0     | 0     | 0     | 0.123 | 0 | 0.126 | 0     | 0.104 | 0.103 | 0 |
| sap30bp   | 0.112 | 0 | 0     | 0     | 0     | 0     | 0.112 | 0 | 0.11  | 0     | 0.145 | 0.145 | 0 |
| whamm     | 0.126 | 0 | 0     | 0     | 0     | 0     | 0.126 | 0 | 0.125 | 0     | 0.127 | 0.127 | 0 |
| cab39     | 0.103 | 0 | 0     | 0     | 0     | 0     | 0.103 | 0 | 0.102 | 0     | 0.161 | 0.16  | 0 |
| mylk      | 0.123 | 0 | 0     | 0     | 0     | 0     | 0.123 | 0 | 0.126 | 0     | 0.111 | 0.11  | 0 |
| dmkn      | 0.112 | 0 | 0     | 0     | 0     | 0     | 0.112 | 0 | 0.114 | 0     | 0.126 | 0.125 | 0 |
| mrx81     | 0.111 | 0 | 0     | 0     | 0     | 0     | 0.111 | 0 | 0.13  | 0     | 0.173 | 0.173 | 0 |
| shank1    | 0.114 | 0 | 0     | 0     | 0     | 0     | 0.114 | 0 | 0.116 | 0     | 0.117 | 0.116 | 0 |
| lcp1      | 0.122 | 0 | 0     | 0     | 0     | 0     | 0.122 | 0 | 0.123 | 0     | 0.107 | 0.105 | 0 |
| gng4      | 0.129 | 0 | 0     | 0     | 0     | 0     | 0.129 | 0 | 0.132 | 0     | 0.102 | 0.101 | 0 |
| pacs2     | 0.125 | 0 | 0     | 0     | 0     | 0     | 0.125 | 0 | 0.124 | 0     | 0.155 | 0.154 | 0 |
| scarna9   | 0.109 | 0 | 0     | 0     | 0     | 0     | 0.109 | 0 | 0.115 | 0     | 0.102 | 0.101 | 0 |
| vps35     | 0.106 | 0 | 0     | 0     | 0     | 0     | 0.106 | 0 | 0.109 | 0     | 0.102 | 0.101 | 0 |
| march5    | 0.102 | 0 | 0     | 0     | 0     | 0     | 0.102 | 0 | 0.112 | 0     | 0.147 | 0.147 | 0 |
| daam1     | 0.124 | 0 | 0     | 0     | 0     | 0     | 0.124 | 0 | 0.129 | 0     | 0.109 | 0.109 | 0 |
| stk38     | 0.117 | 0 | 0     | 0     | 0     | 0     | 0.117 | 0 | 0.119 | 0     | 0.102 | 0.1   | 0 |

|          |       |   |   |   |   |   |       |   |       |   |       |       |   |
|----------|-------|---|---|---|---|---|-------|---|-------|---|-------|-------|---|
| pacsin1  | 0.125 | 0 | 0 | 0 | 0 | 0 | 0.125 | 0 | 0.127 | 0 | 0.115 | 0.113 | 0 |
| katnb1   | 0.131 | 0 | 0 | 0 | 0 | 0 | 0.131 | 0 | 0.133 | 0 | 0.13  | 0.128 | 0 |
| ruvbl2   | 0.108 | 0 | 0 | 0 | 0 | 0 | 0.108 | 0 | 0.109 | 0 | 0.126 | 0.126 | 0 |
| scarna12 | 0.109 | 0 | 0 | 0 | 0 | 0 | 0.109 | 0 | 0.115 | 0 | 0.102 | 0.101 | 0 |
| clasp1   | 0.109 | 0 | 0 | 0 | 0 | 0 | 0.109 | 0 | 0.11  | 0 | 0.106 | 0.106 | 0 |
| scarna17 | 0.109 | 0 | 0 | 0 | 0 | 0 | 0.109 | 0 | 0.115 | 0 | 0.102 | 0.101 | 0 |
| ptprt    | 0.107 | 0 | 0 | 0 | 0 | 0 | 0.107 | 0 | 0.106 | 0 | 0.109 | 0.107 | 0 |
| wash7p   | 0.105 | 0 | 0 | 0 | 0 | 0 | 0.105 | 0 | 0.101 | 0 | 0.108 | 0.107 | 0 |
| arhgap24 | 0.125 | 0 | 0 | 0 | 0 | 0 | 0.125 | 0 | 0.123 | 0 | 0.102 | 0.102 | 0 |
| lrfn3    | 0.113 | 0 | 0 | 0 | 0 | 0 | 0.113 | 0 | 0.117 | 0 | 0.111 | 0.111 | 0 |
| dynll2   | 0.124 | 0 | 0 | 0 | 0 | 0 | 0.124 | 0 | 0.124 | 0 | 0.113 | 0.113 | 0 |
| scarna7  | 0.109 | 0 | 0 | 0 | 0 | 0 | 0.109 | 0 | 0.115 | 0 | 0.102 | 0.101 | 0 |
| plekhh2  | 0.161 | 0 | 0 | 0 | 0 | 0 | 0.161 | 0 | 0.161 | 0 | 0.122 | 0.122 | 0 |
| cttnbp2  | 0.186 | 0 | 0 | 0 | 0 | 0 | 0.186 | 0 | 0.187 | 0 | 0.162 | 0.162 | 0 |
| arfgap1  | 0.186 | 0 | 0 | 0 | 0 | 0 | 0.186 | 0 | 0.202 | 0 | 0.119 | 0.118 | 0 |
| arl1     | 0.186 | 0 | 0 | 0 | 0 | 0 | 0.186 | 0 | 0.211 | 0 | 0.11  | 0.109 | 0 |
| adap1    | 0.184 | 0 | 0 | 0 | 0 | 0 | 0.184 | 0 | 0.188 | 0 | 0.185 | 0.184 | 0 |
| fcho2    | 0.183 | 0 | 0 | 0 | 0 | 0 | 0.183 | 0 | 0.192 | 0 | 0.153 | 0.152 | 0 |
| nexn     | 0.182 | 0 | 0 | 0 | 0 | 0 | 0.182 | 0 | 0.18  | 0 | 0.133 | 0.132 | 0 |
| iqgap3   | 0.182 | 0 | 0 | 0 | 0 | 0 | 0.182 | 0 | 0.183 | 0 | 0.127 | 0.127 | 0 |
| rasa1    | 0.189 | 0 | 0 | 0 | 0 | 0 | 0.189 | 0 | 0.197 | 0 | 0.133 | 0.13  | 0 |
| rab35    | 0.196 | 0 | 0 | 0 | 0 | 0 | 0.196 | 0 | 0.199 | 0 | 0.107 | 0.107 | 0 |
| or7d2    | 0.209 | 0 | 0 | 0 | 0 | 0 | 0.209 | 0 | 0.205 | 0 | 0.133 | 0.132 | 0 |
| ncf2     | 0.21  | 0 | 0 | 0 | 0 | 0 | 0.21  | 0 | 0.208 | 0 | 0.107 | 0.107 | 0 |
| phldb2   | 0.202 | 0 | 0 | 0 | 0 | 0 | 0.202 | 0 | 0.208 | 0 | 0.102 | 0.101 | 0 |
| usp6nl   | 0.201 | 0 | 0 | 0 | 0 | 0 | 0.201 | 0 | 0.201 | 0 | 0.117 | 0.115 | 0 |
| exoc5    | 0.197 | 0 | 0 | 0 | 0 | 0 | 0.197 | 0 | 0.2   | 0 | 0.113 | 0.112 | 0 |
| kptn     | 0.199 | 0 | 0 | 0 | 0 | 0 | 0.199 | 0 | 0.204 | 0 | 0.113 | 0.112 | 0 |
| exoc7    | 0.181 | 0 | 0 | 0 | 0 | 0 | 0.181 | 0 | 0.184 | 0 | 0.157 | 0.156 | 0 |
| znf420   | 0.179 | 0 | 0 | 0 | 0 | 0 | 0.179 | 0 | 0.209 | 0 | 0.116 | 0.115 | 0 |
| c1d      | 0.162 | 0 | 0 | 0 | 0 | 0 | 0.162 | 0 | 0.162 | 0 | 0.154 | 0.153 | 0 |
| acap2    | 0.162 | 0 | 0 | 0 | 0 | 0 | 0.162 | 0 | 0.165 | 0 | 0.11  | 0.109 | 0 |
| arfgef2  | 0.164 | 0 | 0 | 0 | 0 | 0 | 0.164 | 0 | 0.185 | 0 | 0.103 | 0.102 | 0 |
| ap1b1    | 0.16  | 0 | 0 | 0 | 0 | 0 | 0.16  | 0 | 0.159 | 0 | 0.111 | 0.11  | 0 |
| arhgef2  | 0.158 | 0 | 0 | 0 | 0 | 0 | 0.158 | 0 | 0.161 | 0 | 0.106 | 0.105 | 0 |
| mob1b    | 0.152 | 0 | 0 | 0 | 0 | 0 | 0.152 | 0 | 0.155 | 0 | 0.11  | 0.108 | 0 |
| iqsec2   | 0.155 | 0 | 0 | 0 | 0 | 0 | 0.155 | 0 | 0.162 | 0 | 0.12  | 0.119 | 0 |
| tlh2     | 0.166 | 0 | 0 | 0 | 0 | 0 | 0.166 | 0 | 0.18  | 0 | 0.108 | 0.107 | 0 |
| tspan6   | 0.168 | 0 | 0 | 0 | 0 | 0 | 0.168 | 0 | 0.166 | 0 | 0.157 | 0.156 | 0 |
| ncf1     | 0.176 | 0 | 0 | 0 | 0 | 0 | 0.176 | 0 | 0.173 | 0 | 0.116 | 0.115 | 0 |
| arl4a    | 0.177 | 0 | 0 | 0 | 0 | 0 | 0.177 | 0 | 0.18  | 0 | 0.121 | 0.12  | 0 |

|          |       |   |   |   |   |   |       |   |       |   |       |       |   |
|----------|-------|---|---|---|---|---|-------|---|-------|---|-------|-------|---|
| ppfia4   | 0.174 | 0 | 0 | 0 | 0 | 0 | 0.174 | 0 | 0.176 | 0 | 0.163 | 0.162 | 0 |
| tl1n1    | 0.174 | 0 | 0 | 0 | 0 | 0 | 0.174 | 0 | 0.175 | 0 | 0.11  | 0.109 | 0 |
| wash2p   | 0.17  | 0 | 0 | 0 | 0 | 0 | 0.17  | 0 | 0.173 | 0 | 0.127 | 0.126 | 0 |
| exoc8    | 0.171 | 0 | 0 | 0 | 0 | 0 | 0.171 | 0 | 0.173 | 0 | 0.109 | 0.108 | 0 |
| dock5    | 0.211 | 0 | 0 | 0 | 0 | 0 | 0.211 | 0 | 0.212 | 0 | 0.104 | 0.103 | 0 |
| tbc1d24  | 0.212 | 0 | 0 | 0 | 0 | 0 | 0.212 | 0 | 0.232 | 0 | 0.139 | 0.139 | 0 |
| arfip2   | 0.375 | 0 | 0 | 0 | 0 | 0 | 0.375 | 0 | 0.379 | 0 | 0.166 | 0.166 | 0 |
| rap1gds1 | 0.395 | 0 | 0 | 0 | 0 | 0 | 0.395 | 0 | 0.393 | 0 | 0.139 | 0.138 | 0 |
| snx5     | 0.415 | 0 | 0 | 0 | 0 | 0 | 0.415 | 0 | 0.413 | 0 | 0.159 | 0.159 | 0 |
| dock4    | 0.374 | 0 | 0 | 0 | 0 | 0 | 0.374 | 0 | 0.38  | 0 | 0.122 | 0.122 | 0 |
| pip5k1a  | 0.345 | 0 | 0 | 0 | 0 | 0 | 0.345 | 0 | 0.344 | 0 | 0.12  | 0.119 | 0 |
| trio     | 0.338 | 0 | 0 | 0 | 0 | 0 | 0.338 | 0 | 0.338 | 0 | 0.109 | 0.109 | 0 |
| lrfn4    | 0.339 | 0 | 0 | 0 | 0 | 0 | 0.339 | 0 | 0.339 | 0 | 0.147 | 0.147 | 0 |
| prex1    | 0.415 | 0 | 0 | 0 | 0 | 0 | 0.415 | 0 | 0.411 | 0 | 0.106 | 0.104 | 0 |
| sh3rf1   | 0.425 | 0 | 0 | 0 | 0 | 0 | 0.425 | 0 | 0.424 | 0 | 0.122 | 0.121 | 0 |
| nckap1   | 0.529 | 0 | 0 | 0 | 0 | 0 | 0.529 | 0 | 0.524 | 0 | 0.187 | 0.186 | 0 |
| rac1     | 0.563 | 0 | 0 | 0 | 0 | 0 | 0.563 | 0 | 0.557 | 0 | 0.108 | 0.107 | 0 |
| tiam1    | 0.522 | 0 | 0 | 0 | 0 | 0 | 0.522 | 0 | 0.521 | 0 | 0.179 | 0.178 | 0 |
| rhog     | 0.512 | 0 | 0 | 0 | 0 | 0 | 0.512 | 0 | 0.509 | 0 | 0.154 | 0.153 | 0 |
| chn2     | 0.437 | 0 | 0 | 0 | 0 | 0 | 0.437 | 0 | 0.433 | 0 | 0.109 | 0.108 | 0 |
| psd      | 0.479 | 0 | 0 | 0 | 0 | 0 | 0.479 | 0 | 0.477 | 0 | 0.11  | 0.109 | 0 |
| pip5k1c  | 0.317 | 0 | 0 | 0 | 0 | 0 | 0.317 | 0 | 0.32  | 0 | 0.125 | 0.124 | 0 |
| brk1     | 0.279 | 0 | 0 | 0 | 0 | 0 | 0.279 | 0 | 0.277 | 0 | 0.116 | 0.115 | 0 |
| rhobtb3  | 0.216 | 0 | 0 | 0 | 0 | 0 | 0.216 | 0 | 0.22  | 0 | 0.117 | 0.116 | 0 |
| tns1     | 0.217 | 0 | 0 | 0 | 0 | 0 | 0.217 | 0 | 0.218 | 0 | 0.112 | 0.111 | 0 |
| rhobtb1  | 0.215 | 0 | 0 | 0 | 0 | 0 | 0.215 | 0 | 0.22  | 0 | 0.141 | 0.141 | 0 |
| itgb7    | 0.213 | 0 | 0 | 0 | 0 | 0 | 0.213 | 0 | 0.209 | 0 | 0.167 | 0.167 | 0 |
| zfyve27  | 0.212 | 0 | 0 | 0 | 0 | 0 | 0.212 | 0 | 0.214 | 0 | 0.133 | 0.132 | 0 |
| arl2bp   | 0.212 | 0 | 0 | 0 | 0 | 0 | 0.212 | 0 | 0.232 | 0 | 0.105 | 0.103 | 0 |
| cyth1    | 0.219 | 0 | 0 | 0 | 0 | 0 | 0.219 | 0 | 0.22  | 0 | 0.116 | 0.115 | 0 |
| map3k6   | 0.225 | 0 | 0 | 0 | 0 | 0 | 0.225 | 0 | 0.223 | 0 | 0.103 | 0.102 | 0 |
| layn     | 0.252 | 0 | 0 | 0 | 0 | 0 | 0.252 | 0 | 0.249 | 0 | 0.112 | 0.111 | 0 |
| abr      | 0.269 | 0 | 0 | 0 | 0 | 0 | 0.269 | 0 | 0.269 | 0 | 0.182 | 0.181 | 0 |
| arhgap9  | 0.251 | 0 | 0 | 0 | 0 | 0 | 0.251 | 0 | 0.247 | 0 | 0.152 | 0.151 | 0 |
| gbf1     | 0.239 | 0 | 0 | 0 | 0 | 0 | 0.239 | 0 | 0.247 | 0 | 0.108 | 0.107 | 0 |
| nf2      | 0.23  | 0 | 0 | 0 | 0 | 0 | 0.23  | 0 | 0.24  | 0 | 0.18  | 0.179 | 0 |
| ngef     | 0.237 | 0 | 0 | 0 | 0 | 0 | 0.237 | 0 | 0.237 | 0 | 0.129 | 0.129 | 0 |
| arhgap12 | 0.152 | 0 | 0 | 0 | 0 | 0 | 0.152 | 0 | 0.151 | 0 | 0.162 | 0.162 | 0 |
| dgcr6l   | 0.201 | 0 | 0 | 0 | 0 | 0 | 0.201 | 0 | 0.2   | 0 | 0.146 | 0.145 | 0 |
| cf12     | 0.145 | 0 | 0 | 0 | 0 | 0 | 0.145 | 0 | 0.143 | 0 | 0.105 | 0.104 | 0 |
| iqsec3   | 0.15  | 0 | 0 | 0 | 0 | 0 | 0.15  | 0 | 0.168 | 0 | 0.103 | 0.102 | 0 |

|           |       |   |   |       |       |   |       |   |       |       |       |       |       |
|-----------|-------|---|---|-------|-------|---|-------|---|-------|-------|-------|-------|-------|
| copz2     | 0.146 | 0 | 0 | 0     | 0     | 0 | 0.146 | 0 | 0.148 | 0     | 0.105 | 0.104 | 0     |
| rab11fip4 | 0.137 | 0 | 0 | 0     | 0     | 0 | 0.137 | 0 | 0.138 | 0     | 0.106 | 0.105 | 0     |
| capg      | 0.151 | 0 | 0 | 0     | 0     | 0 | 0.151 | 0 | 0.158 | 0     | 0.119 | 0.118 | 0     |
| taok3     | 0.134 | 0 | 0 | 0     | 0     | 0 | 0.134 | 0 | 0.131 | 0     | 0.104 | 0.104 | 0     |
| ccdc141   | 0.134 | 0 | 0 | 0     | 0     | 0 | 0.134 | 0 | 0.127 | 0     | 0.112 | 0.111 | 0     |
| gas2l3    | 0.141 | 0 | 0 | 0     | 0     | 0 | 0.141 | 0 | 0.139 | 0     | 0.139 | 0.138 | 0     |
| epn3      | 0.148 | 0 | 0 | 0     | 0     | 0 | 0.148 | 0 | 0.156 | 0     | 0.137 | 0.137 | 0     |
| ap1g1     | 0.143 | 0 | 0 | 0     | 0     | 0 | 0.143 | 0 | 0.153 | 0     | 0.114 | 0.113 | 0     |
| ap1g2     | 0.143 | 0 | 0 | 0     | 0     | 0 | 0.143 | 0 | 0.147 | 0     | 0.141 | 0.14  | 0     |
| taok2     | 0.137 | 0 | 0 | 0     | 0     | 0 | 0.137 | 0 | 0.135 | 0     | 0.168 | 0.166 | 0     |
| sytl1     | 0.142 | 0 | 0 | 0     | 0     | 0 | 0.142 | 0 | 0.152 | 0     | 0.143 | 0.143 | 0     |
| coro2b    | 0.147 | 0 | 0 | 0     | 0     | 0 | 0.147 | 0 | 0.143 | 0     | 0.109 | 0.109 | 0     |
| fblim1    | 0.147 | 0 | 0 | 0     | 0     | 0 | 0.147 | 0 | 0.146 | 0     | 0.127 | 0.125 | 0     |
| ppfia2    | 0.138 | 0 | 0 | 0     | 0     | 0 | 0.138 | 0 | 0.14  | 0     | 0.112 | 0.111 | 0     |
| ppp1r9a   | 0.146 | 0 | 0 | 0     | 0     | 0 | 0.146 | 0 | 0.146 | 0     | 0.105 | 0.104 | 0     |
| frmpd4    | 0.151 | 0 | 0 | 0     | 0     | 0 | 0.151 | 0 | 0.151 | 0     | 0.154 | 0.153 | 0     |
| mapk11    | 0.151 | 0 | 0 | 0     | 0     | 0 | 0.151 | 0 | 0.15  | 0     | 0.175 | 0.173 | 0     |
| ppp1r42   | 0.145 | 0 | 0 | 0     | 0     | 0 | 0.145 | 0 | 0.151 | 0     | 0.114 | 0.112 | 0     |
| loc647323 | 0.139 | 0 | 0 | 0     | 0     | 0 | 0.139 | 0 | 0.148 | 0     | 0.129 | 0.128 | 0     |
| khdrbs1   | 0.134 | 0 | 0 | 0     | 0     | 0 | 0.134 | 0 | 0.14  | 0     | 0.126 | 0.124 | 0     |
| ap2s1     | 0.138 | 0 | 0 | 0     | 0     | 0 | 0.138 | 0 | 0.138 | 0     | 0.136 | 0.135 | 0     |
| map3k11   | 0.138 | 0 | 0 | 0     | 0     | 0 | 0.138 | 0 | 0.14  | 0     | 0.122 | 0.12  | 0     |
| zc4h2     | 0.132 | 0 | 0 | 0     | 0     | 0 | 0.132 | 0 | 0.131 | 0     | 0.12  | 0.119 | 0     |
| katna1    | 0.132 | 0 | 0 | 0     | 0     | 0 | 0.132 | 0 | 0.135 | 0     | 0.12  | 0.118 | 0     |
| jmjd6     | 0.138 | 0 | 0 | 0     | 0     | 0 | 0.138 | 0 | 0.135 | 0     | 0.104 | 0.103 | 0     |
| rfx8      | 0.139 | 0 | 0 | 0     | 0     | 0 | 0.139 | 0 | 0.148 | 0     | 0.129 | 0.128 | 0     |
| mertk     | 0.138 | 0 | 0 | 0     | 0     | 0 | 0.138 | 0 | 0.137 | 0     | 0.102 | 0.101 | 0     |
| robo4     | 0.144 | 0 | 0 | 0     | 0     | 0 | 0.144 | 0 | 0.143 | 0     | 0.135 | 0.134 | 0     |
| ppp1r16b  | 0.152 | 0 | 0 | 0     | 0     | 0 | 0.152 | 0 | 0.151 | 0     | 0.112 | 0.111 | 0     |
| uqcr10    | 0     | 0 | 0 | 0.122 | 0.122 | 0 | 0     | 0 | 0     | 0.122 | 0.116 | 0.115 | 0     |
| wnk1      | 0     | 0 | 0 | 0.204 | 0.204 | 0 | 0     | 0 | 0     | 0.204 | 0.113 | 0.112 | 0     |
| cnnm2     | 0     | 0 | 0 | 0.196 | 0.196 | 0 | 0     | 0 | 0     | 0.196 | 0.135 | 0.134 | 0     |
| ctpp      | 0     | 0 | 0 | 0.178 | 0.178 | 0 | 0     | 0 | 0     | 0.178 | 0.122 | 0.121 | 0     |
| macom     | 0     | 0 | 0 | 0.124 | 0.124 | 0 | 0     | 0 | 0     | 0.124 | 0.128 | 0.128 | 0     |
| stk39     | 0     | 0 | 0 | 0.184 | 0.184 | 0 | 0     | 0 | 0     | 0.184 | 0.116 | 0.115 | 0     |
| flot1     | 0.143 | 0 | 0 | 0     | 0     | 0 | 0.143 | 0 | 0.145 | 0     | 0     | 0     | 0.249 |
| rapgef5   | 0.196 | 0 | 0 | 0     | 0     | 0 | 0.196 | 0 | 0.197 | 0     | 0     | 0     | 0.181 |
| stap2     | 0.103 | 0 | 0 | 0     | 0     | 0 | 0.103 | 0 | 0.102 | 0     | 0     | 0     | 0.349 |
| cblc      | 0.144 | 0 | 0 | 0     | 0     | 0 | 0.144 | 0 | 0.142 | 0     | 0     | 0     | 0.595 |
| dnm2      | 0.195 | 0 | 0 | 0     | 0     | 0 | 0.195 | 0 | 0.201 | 0     | 0     | 0     | 0.125 |
| gif       | 0.118 | 0 | 0 | 0     | 0     | 0 | 0.118 | 0 | 0.117 | 0     | 0     | 0     | 0.567 |

|          |       |   |   |   |   |   |       |   |       |   |   |   |       |
|----------|-------|---|---|---|---|---|-------|---|-------|---|---|---|-------|
| chmp4a   | 0.118 | 0 | 0 | 0 | 0 | 0 | 0.118 | 0 | 0.129 | 0 | 0 | 0 | 0.11  |
| sgip1    | 0.129 | 0 | 0 | 0 | 0 | 0 | 0.129 | 0 | 0.134 | 0 | 0 | 0 | 0.145 |
| rab36    | 0.111 | 0 | 0 | 0 | 0 | 0 | 0.111 | 0 | 0.122 | 0 | 0 | 0 | 0.113 |
| rgs3     | 0.245 | 0 | 0 | 0 | 0 | 0 | 0.245 | 0 | 0.254 | 0 | 0 | 0 | 0.108 |
| pik3c2b  | 0.259 | 0 | 0 | 0 | 0 | 0 | 0.259 | 0 | 0.266 | 0 | 0 | 0 | 0.161 |
| vav2     | 0.262 | 0 | 0 | 0 | 0 | 0 | 0.262 | 0 | 0.261 | 0 | 0 | 0 | 0.183 |
| chmp4b   | 0.113 | 0 | 0 | 0 | 0 | 0 | 0.113 | 0 | 0.122 | 0 | 0 | 0 | 0.117 |
| gcc1     | 0.112 | 0 | 0 | 0 | 0 | 0 | 0.112 | 0 | 0.116 | 0 | 0 | 0 | 0.174 |
| ppp2r1a  | 0.113 | 0 | 0 | 0 | 0 | 0 | 0.113 | 0 | 0.113 | 0 | 0 | 0 | 0.146 |
| lphn2    | 0.128 | 0 | 0 | 0 | 0 | 0 | 0.128 | 0 | 0.13  | 0 | 0 | 0 | 0.109 |
| spry2    | 0.128 | 0 | 0 | 0 | 0 | 0 | 0.128 | 0 | 0.127 | 0 | 0 | 0 | 0.439 |
| cbl      | 0.141 | 0 | 0 | 0 | 0 | 0 | 0.141 | 0 | 0.139 | 0 | 0 | 0 | 0.605 |
| tmem217  | 0.102 | 0 | 0 | 0 | 0 | 0 | 0.102 | 0 | 0.119 | 0 | 0 | 0 | 0.136 |
| shkbp1   | 0.116 | 0 | 0 | 0 | 0 | 0 | 0.116 | 0 | 0.113 | 0 | 0 | 0 | 0.527 |
| sh3gl3   | 0.11  | 0 | 0 | 0 | 0 | 0 | 0.11  | 0 | 0.111 | 0 | 0 | 0 | 0.287 |
| mapk7    | 0.111 | 0 | 0 | 0 | 0 | 0 | 0.111 | 0 | 0.128 | 0 | 0 | 0 | 0.138 |
| dnm3     | 0.141 | 0 | 0 | 0 | 0 | 0 | 0.141 | 0 | 0.161 | 0 | 0 | 0 | 0.111 |
| ptpn20b  | 0.116 | 0 | 0 | 0 | 0 | 0 | 0.116 | 0 | 0.119 | 0 | 0 | 0 | 0.123 |
| cblb     | 0.129 | 0 | 0 | 0 | 0 | 0 | 0.129 | 0 | 0.128 | 0 | 0 | 0 | 0.535 |
| arhgap36 | 0.145 | 0 | 0 | 0 | 0 | 0 | 0.145 | 0 | 0.149 | 0 | 0 | 0 | 0.162 |
| sla      | 0.168 | 0 | 0 | 0 | 0 | 0 | 0.168 | 0 | 0.168 | 0 | 0 | 0 | 0.46  |
| mtmr6    | 0.122 | 0 | 0 | 0 | 0 | 0 | 0.122 | 0 | 0.13  | 0 | 0 | 0 | 0.133 |
| aldh16a1 | 0.104 | 0 | 0 | 0 | 0 | 0 | 0.104 | 0 | 0.112 | 0 | 0 | 0 | 0.312 |
| trip6    | 0.162 | 0 | 0 | 0 | 0 | 0 | 0.162 | 0 | 0.164 | 0 | 0 | 0 | 0.142 |
| epha1    | 0.171 | 0 | 0 | 0 | 0 | 0 | 0.171 | 0 | 0.17  | 0 | 0 | 0 | 0.128 |
| rab5a    | 0.172 | 0 | 0 | 0 | 0 | 0 | 0.172 | 0 | 0.177 | 0 | 0 | 0 | 0.129 |
| sh3kbp1  | 0.147 | 0 | 0 | 0 | 0 | 0 | 0.147 | 0 | 0.146 | 0 | 0 | 0 | 0.593 |
| stap1    | 0.104 | 0 | 0 | 0 | 0 | 0 | 0.104 | 0 | 0.105 | 0 | 0 | 0 | 0.144 |
| asb6     | 0.118 | 0 | 0 | 0 | 0 | 0 | 0.118 | 0 | 0.122 | 0 | 0 | 0 | 0.286 |
| rab21    | 0.174 | 0 | 0 | 0 | 0 | 0 | 0.174 | 0 | 0.179 | 0 | 0 | 0 | 0.108 |
| pdcd6ip  | 0.105 | 0 | 0 | 0 | 0 | 0 | 0.105 | 0 | 0.109 | 0 | 0 | 0 | 0.131 |
| epha2    | 0.161 | 0 | 0 | 0 | 0 | 0 | 0.161 | 0 | 0.163 | 0 | 0 | 0 | 0.298 |
| necap2   | 0.124 | 0 | 0 | 0 | 0 | 0 | 0.124 | 0 | 0.127 | 0 | 0 | 0 | 0.153 |
| inpp1    | 0.106 | 0 | 0 | 0 | 0 | 0 | 0.106 | 0 | 0.108 | 0 | 0 | 0 | 0.152 |
| rap2b    | 0.152 | 0 | 0 | 0 | 0 | 0 | 0.152 | 0 | 0.158 | 0 | 0 | 0 | 0.106 |
| sla2     | 0.152 | 0 | 0 | 0 | 0 | 0 | 0.152 | 0 | 0.152 | 0 | 0 | 0 | 0.575 |
| ankrd55  | 0.155 | 0 | 0 | 0 | 0 | 0 | 0.155 | 0 | 0.154 | 0 | 0 | 0 | 0.113 |
| map7d3   | 0.123 | 0 | 0 | 0 | 0 | 0 | 0.123 | 0 | 0.123 | 0 | 0 | 0 | 0.133 |
| epha10   | 0.152 | 0 | 0 | 0 | 0 | 0 | 0.152 | 0 | 0.151 | 0 | 0 | 0 | 0.141 |
| gng13    | 0.106 | 0 | 0 | 0 | 0 | 0 | 0.106 | 0 | 0.112 | 0 | 0 | 0 | 0.106 |
| epha8    | 0.158 | 0 | 0 | 0 | 0 | 0 | 0.158 | 0 | 0.158 | 0 | 0 | 0 | 0.138 |

|           |       |   |   |       |       |   |       |   |       |       |   |   |       |
|-----------|-------|---|---|-------|-------|---|-------|---|-------|-------|---|---|-------|
| foxd4l5   | 0.104 | 0 | 0 | 0     | 0     | 0 | 0.104 | 0 | 0.101 | 0     | 0 | 0 | 0.136 |
| sh2b2     | 0.136 | 0 | 0 | 0     | 0     | 0 | 0.136 | 0 | 0.135 | 0     | 0 | 0 | 0.483 |
| foxd4l2   | 0.104 | 0 | 0 | 0     | 0     | 0 | 0.104 | 0 | 0.101 | 0     | 0 | 0 | 0.136 |
| foxd4l4   | 0.104 | 0 | 0 | 0     | 0     | 0 | 0.104 | 0 | 0.101 | 0     | 0 | 0 | 0.136 |
| sh3gl2    | 0.119 | 0 | 0 | 0     | 0     | 0 | 0.119 | 0 | 0.131 | 0     | 0 | 0 | 0.222 |
| rap1a     | 0.183 | 0 | 0 | 0     | 0     | 0 | 0.183 | 0 | 0.188 | 0     | 0 | 0 | 0.157 |
| rap1bl    | 0.126 | 0 | 0 | 0     | 0     | 0 | 0.126 | 0 | 0.129 | 0     | 0 | 0 | 0.142 |
| gdi2      | 0.145 | 0 | 0 | 0     | 0     | 0 | 0.145 | 0 | 0.148 | 0     | 0 | 0 | 0.106 |
| foxd4l6   | 0.104 | 0 | 0 | 0     | 0     | 0 | 0.104 | 0 | 0.101 | 0     | 0 | 0 | 0.136 |
| mknk1     | 0.104 | 0 | 0 | 0     | 0     | 0 | 0.104 | 0 | 0.102 | 0     | 0 | 0 | 0.144 |
| dnm1      | 0.12  | 0 | 0 | 0     | 0     | 0 | 0.12  | 0 | 0.123 | 0     | 0 | 0 | 0.116 |
| kifc2     | 0.125 | 0 | 0 | 0     | 0     | 0 | 0.125 | 0 | 0.125 | 0     | 0 | 0 | 0.129 |
| EIF3B     | 0.108 | 0 | 0 | 0     | 0     | 0 | 0.108 | 0 | 0.113 | 0     | 0 | 0 | 0.155 |
| rrad      | 0     | 0 | 0 | 0.116 | 0.116 | 0 | 0     | 0 | 0     | 0.116 | 0 | 0 | 0.109 |
| znf664    | 0     | 0 | 0 | 0.129 | 0.129 | 0 | 0     | 0 | 0     | 0.129 | 0 | 0 | 0.136 |
| impdh1p11 | 0     | 0 | 0 | 0.123 | 0.123 | 0 | 0     | 0 | 0     | 0.123 | 0 | 0 | 0.118 |
| akap5     | 0     | 0 | 0 | 0.116 | 0.116 | 0 | 0     | 0 | 0     | 0.116 | 0 | 0 | 0.138 |
| etf1p2    | 0     | 0 | 0 | 0.126 | 0.126 | 0 | 0     | 0 | 0     | 0.126 | 0 | 0 | 0.152 |
| fars2     | 0     | 0 | 0 | 0.115 | 0.115 | 0 | 0     | 0 | 0     | 0.115 | 0 | 0 | 0.117 |
| sctr      | 0     | 0 | 0 | 0.182 | 0.182 | 0 | 0     | 0 | 0     | 0.182 | 0 | 0 | 0.186 |
| clcn2     | 0     | 0 | 0 | 0.126 | 0.126 | 0 | 0     | 0 | 0     | 0.126 | 0 | 0 | 0.102 |
| hrh3      | 0     | 0 | 0 | 0.115 | 0.115 | 0 | 0     | 0 | 0     | 0.115 | 0 | 0 | 0.103 |
| vn1r1     | 0     | 0 | 0 | 0.102 | 0.102 | 0 | 0     | 0 | 0     | 0.102 | 0 | 0 | 0.102 |
| asic4     | 0     | 0 | 0 | 0.12  | 0.12  | 0 | 0     | 0 | 0     | 0.12  | 0 | 0 | 0.14  |
| ppip5k1   | 0     | 0 | 0 | 0.191 | 0.191 | 0 | 0     | 0 | 0     | 0.191 | 0 | 0 | 0.198 |
| etf1p3    | 0     | 0 | 0 | 0.126 | 0.126 | 0 | 0     | 0 | 0     | 0.126 | 0 | 0 | 0.152 |
| trpm3     | 0     | 0 | 0 | 0.127 | 0.127 | 0 | 0     | 0 | 0     | 0.127 | 0 | 0 | 0.168 |
| c15orf27  | 0     | 0 | 0 | 0.119 | 0.119 | 0 | 0     | 0 | 0     | 0.119 | 0 | 0 | 0.109 |
| slc24a1   | 0     | 0 | 0 | 0.182 | 0.182 | 0 | 0     | 0 | 0     | 0.182 | 0 | 0 | 0.112 |
| pdcd6     | 0     | 0 | 0 | 0.126 | 0.126 | 0 | 0     | 0 | 0     | 0.126 | 0 | 0 | 0.133 |
| pkd1l3    | 0     | 0 | 0 | 0.126 | 0.126 | 0 | 0     | 0 | 0     | 0.126 | 0 | 0 | 0.132 |
| kcnk6     | 0     | 0 | 0 | 0.132 | 0.132 | 0 | 0     | 0 | 0     | 0.132 | 0 | 0 | 0.119 |
| slc5a6    | 0     | 0 | 0 | 0.178 | 0.178 | 0 | 0     | 0 | 0     | 0.178 | 0 | 0 | 0.128 |
| kcnj14    | 0     | 0 | 0 | 0.138 | 0.138 | 0 | 0     | 0 | 0     | 0.138 | 0 | 0 | 0.108 |
| atf4p3    | 0     | 0 | 0 | 0.107 | 0.107 | 0 | 0     | 0 | 0     | 0.107 | 0 | 0 | 0.105 |
| gpr27     | 0     | 0 | 0 | 0.114 | 0.114 | 0 | 0     | 0 | 0     | 0.114 | 0 | 0 | 0.14  |
| kcnk2     | 0     | 0 | 0 | 0.106 | 0.106 | 0 | 0     | 0 | 0     | 0.106 | 0 | 0 | 0.161 |
| tmem100   | 0     | 0 | 0 | 0.271 | 0.271 | 0 | 0     | 0 | 0     | 0.271 | 0 | 0 | 0.115 |
| slc6a13   | 0     | 0 | 0 | 0.112 | 0.112 | 0 | 0     | 0 | 0     | 0.112 | 0 | 0 | 0.102 |
| atf4p4    | 0     | 0 | 0 | 0.107 | 0.107 | 0 | 0     | 0 | 0     | 0.107 | 0 | 0 | 0.105 |
| slc44a1   | 0     | 0 | 0 | 0.169 | 0.169 | 0 | 0     | 0 | 0     | 0.169 | 0 | 0 | 0.108 |

|          |       |   |       |       |       |       |       |   |       |       |       |       |       |
|----------|-------|---|-------|-------|-------|-------|-------|---|-------|-------|-------|-------|-------|
| kcsn3    | 0     | 0 | 0     | 0.153 | 0.153 | 0     | 0     | 0 | 0     | 0.153 | 0     | 0     | 0.116 |
| ca5b     | 0     | 0 | 0     | 0.224 | 0.224 | 0     | 0     | 0 | 0     | 0.224 | 0     | 0     | 0.108 |
| kcnk1    | 0     | 0 | 0     | 0.156 | 0.156 | 0     | 0     | 0 | 0     | 0.156 | 0     | 0     | 0.15  |
| cacfd1   | 0     | 0 | 0     | 0.112 | 0.112 | 0     | 0     | 0 | 0     | 0.112 | 0     | 0     | 0.11  |
| kcnk18   | 0     | 0 | 0     | 0.107 | 0.107 | 0     | 0     | 0 | 0     | 0.107 | 0     | 0     | 0.198 |
| kcnk10   | 0     | 0 | 0     | 0.14  | 0.14  | 0     | 0     | 0 | 0     | 0.14  | 0     | 0     | 0.11  |
| piezo2   | 0     | 0 | 0     | 0.114 | 0.114 | 0     | 0     | 0 | 0     | 0.114 | 0     | 0     | 0.215 |
| kcnk4    | 0     | 0 | 0     | 0.132 | 0.132 | 0     | 0     | 0 | 0     | 0.132 | 0     | 0     | 0.163 |
| asic1    | 0     | 0 | 0     | 0.147 | 0.147 | 0     | 0     | 0 | 0     | 0.147 | 0     | 0     | 0.197 |
| fyco1    | 0     | 0 | 0     | 0.174 | 0.174 | 0     | 0     | 0 | 0     | 0.174 | 0     | 0     | 0.121 |
| kcnk9    | 0     | 0 | 0     | 0.131 | 0.131 | 0     | 0     | 0 | 0     | 0.131 | 0     | 0     | 0.117 |
| asic2    | 0     | 0 | 0     | 0.144 | 0.144 | 0     | 0     | 0 | 0     | 0.144 | 0     | 0     | 0.187 |
| trpv4    | 0     | 0 | 0     | 0.146 | 0.146 | 0     | 0     | 0 | 0     | 0.146 | 0     | 0     | 0.191 |
| kcna4    | 0     | 0 | 0     | 0.115 | 0.115 | 0     | 0     | 0 | 0     | 0.115 | 0     | 0     | 0.118 |
| mrgprx3  | 0     | 0 | 0     | 0.105 | 0.105 | 0     | 0     | 0 | 0     | 0.105 | 0     | 0     | 0.178 |
| tes      | 0     | 0 | 0     | 0.103 | 0.103 | 0     | 0     | 0 | 0     | 0.103 | 0     | 0     | 0.121 |
| nkain3   | 0     | 0 | 0     | 0.162 | 0.162 | 0     | 0     | 0 | 0     | 0.162 | 0     | 0     | 0.165 |
| hrh4     | 0     | 0 | 0     | 0.114 | 0.114 | 0     | 0     | 0 | 0     | 0.114 | 0     | 0     | 0.115 |
| ppip5k2  | 0     | 0 | 0     | 0.24  | 0.24  | 0     | 0     | 0 | 0     | 0.24  | 0     | 0     | 0.144 |
| s100z    | 0     | 0 | 0     | 0.111 | 0.111 | 0     | 0     | 0 | 0     | 0.111 | 0     | 0     | 0.104 |
| spata6   | 0     | 0 | 0     | 0.167 | 0.167 | 0     | 0     | 0 | 0.101 | 0.167 | 0     | 0     | 0     |
| rab20    | 0     | 0 | 0     | 0.105 | 0.105 | 0     | 0     | 0 | 0.137 | 0.105 | 0     | 0     | 0     |
| cnn1     | 0     | 0 | 0     | 0.196 | 0.196 | 0     | 0     | 0 | 0.105 | 0.196 | 0     | 0     | 0     |
| nme4     | 0     | 0 | 0     | 0.104 | 0.104 | 0     | 0     | 0 | 0.101 | 0.104 | 0     | 0     | 0     |
| ovca2    | 0     | 0 | 0     | 0.109 | 0.109 | 0     | 0     | 0 | 0.104 | 0.109 | 0     | 0     | 0     |
| mpp1     | 0     | 0 | 0     | 0.113 | 0.113 | 0     | 0     | 0 | 0.104 | 0.113 | 0     | 0     | 0     |
| gja3     | 0     | 0 | 0     | 0.105 | 0.105 | 0     | 0     | 0 | 0.109 | 0.105 | 0     | 0     | 0     |
| fmnl1    | 0.279 | 0 | 0     | 0     | 0     | 0     | 0.279 | 0 | 0.277 | 0     | 0.1   | 0     | 0     |
| stk38l   | 0.141 | 0 | 0     | 0     | 0     | 0     | 0.141 | 0 | 0.16  | 0     | 0.101 | 0     | 0     |
| hcls1    | 0.101 | 0 | 0     | 0     | 0     | 0     | 0.101 | 0 | 0.105 | 0     | 0.101 | 0     | 0     |
| wash4p   | 0.102 | 0 | 0     | 0     | 0     | 0     | 0.102 | 0 | 0     | 0     | 0.103 | 0.103 | 0     |
| ppwd1    | 0.1   | 0 | 0     | 0     | 0     | 0     | 0.1   | 0 | 0     | 0     | 0.134 | 0.134 | 0     |
| arhgef16 | 0.124 | 0 | 0     | 0     | 0     | 0     | 0.124 | 0 | 0.141 | 0     | 0     | 0     | 0.102 |
| arap1    | 0.23  | 0 | 0     | 0     | 0     | 0     | 0.23  | 0 | 0.239 | 0     | 0     | 0     | 0.102 |
| mtif3    | 0.117 | 0 | 0     | 0     | 0     | 0     | 0.117 | 0 | 0.134 | 0     | 0     | 0     | 0.101 |
| inpp4a   | 0.123 | 0 | 0     | 0     | 0     | 0     | 0.123 | 0 | 0.124 | 0     | 0     | 0     | 0.104 |
| epb41l4b | 0.104 | 0 | 0     | 0     | 0     | 0     | 0.104 | 0 | 0.106 | 0     | 0     | 0     | 0.1   |
| cpne6    | 0     | 0 | 0     | 0.121 | 0.121 | 0     | 0     | 0 | 0     | 0.121 | 0     | 0     | 0.103 |
| trpm2    | 0     | 0 | 0     | 0.165 | 0.165 | 0     | 0     | 0 | 0     | 0.165 | 0     | 0     | 0.1   |
| adal     | 0     | 0 | 0.104 | 0     | 0     | 0.104 | 0     | 0 | 0     | 0     | 0     | 0     | 0.125 |
| tas2r31  | 0     | 0 | 0.115 | 0     | 0     | 0.115 | 0     | 0 | 0     | 0     | 0     | 0     | 0.152 |

|           |       |   |       |   |   |       |       |   |       |   |       |       |       |
|-----------|-------|---|-------|---|---|-------|-------|---|-------|---|-------|-------|-------|
| chga      | 0     | 0 | 0.104 | 0 | 0 | 0.104 | 0     | 0 | 0     | 0 | 0     | 0     | 0.127 |
| mmachc    | 0     | 0 | 0.129 | 0 | 0 | 0.129 | 0     | 0 | 0     | 0 | 0     | 0     | 0.183 |
| resp18    | 0     | 0 | 0.107 | 0 | 0 | 0.107 | 0     | 0 | 0     | 0 | 0     | 0     | 0.117 |
| ttc39a    | 0.103 | 0 | 0     | 0 | 0 | 0     | 0.103 | 0 | 0     | 0 | 0     | 0     | 0.33  |
| spred3    | 0.101 | 0 | 0     | 0 | 0 | 0     | 0.101 | 0 | 0     | 0 | 0     | 0     | 0.469 |
| arhgap33  | 0     | 0 | 0     | 0 | 0 | 0     | 0     | 0 | 0     | 0 | 0.104 | 0.102 | 0.158 |
| cdc42     | 0     | 0 | 0     | 0 | 0 | 0     | 0     | 0 | 0     | 0 | 0.144 | 0.144 | 0.123 |
| cdc42ep1  | 0     | 0 | 0     | 0 | 0 | 0     | 0     | 0 | 0     | 0 | 0.213 | 0.213 | 0.162 |
| arhgap10  | 0     | 0 | 0     | 0 | 0 | 0     | 0     | 0 | 0     | 0 | 0.193 | 0.192 | 0.179 |
| mesdc1    | 0     | 0 | 0     | 0 | 0 | 0     | 0     | 0 | 0     | 0 | 0.125 | 0.124 | 0.117 |
| itsn1     | 0     | 0 | 0     | 0 | 0 | 0     | 0     | 0 | 0     | 0 | 0.103 | 0.102 | 0.305 |
| lcp2      | 0     | 0 | 0     | 0 | 0 | 0     | 0     | 0 | 0     | 0 | 0.112 | 0.11  | 0.213 |
| hsp90b3p  | 0     | 0 | 0     | 0 | 0 | 0     | 0     | 0 | 0     | 0 | 0.176 | 0.176 | 0.13  |
| fam50b    | 0     | 0 | 0     | 0 | 0 | 0     | 0     | 0 | 0     | 0 | 0.13  | 0.13  | 0.12  |
| trip10    | 0     | 0 | 0     | 0 | 0 | 0     | 0     | 0 | 0     | 0 | 0.124 | 0.123 | 0.131 |
| bnip2     | 0     | 0 | 0     | 0 | 0 | 0     | 0     | 0 | 0     | 0 | 0.138 | 0.138 | 0.126 |
| fnbp1     | 0     | 0 | 0     | 0 | 0 | 0     | 0     | 0 | 0     | 0 | 0.11  | 0.109 | 0.115 |
| cdc42p6   | 0     | 0 | 0     | 0 | 0 | 0     | 0     | 0 | 0     | 0 | 0.119 | 0.119 | 0.113 |
| tbc1d10a  | 0.101 | 0 | 0     | 0 | 0 | 0     | 0.101 | 0 | 0.106 | 0 | 0     | 0     | 0     |
| ighv1-3   | 0.101 | 0 | 0     | 0 | 0 | 0     | 0.101 | 0 | 0.118 | 0 | 0     | 0     | 0     |
| myrip     | 0.1   | 0 | 0     | 0 | 0 | 0     | 0.1   | 0 | 0.1   | 0 | 0     | 0     | 0     |
| bin2      | 0.101 | 0 | 0     | 0 | 0 | 0     | 0.101 | 0 | 0.101 | 0 | 0     | 0     | 0     |
| lrrc14    | 0.1   | 0 | 0     | 0 | 0 | 0     | 0.1   | 0 | 0.11  | 0 | 0     | 0     | 0     |
| stmn3     | 0.102 | 0 | 0     | 0 | 0 | 0     | 0.102 | 0 | 0.105 | 0 | 0     | 0     | 0     |
| obs1      | 0.104 | 0 | 0     | 0 | 0 | 0     | 0.104 | 0 | 0.104 | 0 | 0     | 0     | 0     |
| arhgap25  | 0.104 | 0 | 0     | 0 | 0 | 0     | 0.104 | 0 | 0.106 | 0 | 0     | 0     | 0     |
| mpp5      | 0.102 | 0 | 0     | 0 | 0 | 0     | 0.102 | 0 | 0.111 | 0 | 0     | 0     | 0     |
| ddn       | 0.101 | 0 | 0     | 0 | 0 | 0     | 0.101 | 0 | 0.104 | 0 | 0     | 0     | 0     |
| rab11fip1 | 0.105 | 0 | 0     | 0 | 0 | 0     | 0.105 | 0 | 0.106 | 0 | 0     | 0     | 0     |
| eif4e3    | 0.105 | 0 | 0     | 0 | 0 | 0     | 0.105 | 0 | 0.102 | 0 | 0     | 0     | 0     |
| mypn      | 0.102 | 0 | 0     | 0 | 0 | 0     | 0.102 | 0 | 0.104 | 0 | 0     | 0     | 0     |
| copb2     | 0.1   | 0 | 0     | 0 | 0 | 0     | 0.1   | 0 | 0.101 | 0 | 0     | 0     | 0     |
| spire2    | 0.105 | 0 | 0     | 0 | 0 | 0     | 0.105 | 0 | 0.105 | 0 | 0     | 0     | 0     |
| rasa4b    | 0.101 | 0 | 0     | 0 | 0 | 0     | 0.101 | 0 | 0.105 | 0 | 0     | 0     | 0     |
| tpm2      | 0.105 | 0 | 0     | 0 | 0 | 0     | 0.105 | 0 | 0.102 | 0 | 0     | 0     | 0     |
| mff       | 0.1   | 0 | 0     | 0 | 0 | 0     | 0.1   | 0 | 0.102 | 0 | 0     | 0     | 0     |
| rgl1      | 0.105 | 0 | 0     | 0 | 0 | 0     | 0.105 | 0 | 0.108 | 0 | 0     | 0     | 0     |
| gpr158    | 0.1   | 0 | 0     | 0 | 0 | 0     | 0.1   | 0 | 0.101 | 0 | 0     | 0     | 0     |
| mterfd3   | 0.102 | 0 | 0     | 0 | 0 | 0     | 0.102 | 0 | 0.101 | 0 | 0     | 0     | 0     |
| ptpn21    | 0.103 | 0 | 0     | 0 | 0 | 0     | 0.103 | 0 | 0.103 | 0 | 0     | 0     | 0     |
| ehd1      | 0.103 | 0 | 0     | 0 | 0 | 0     | 0.103 | 0 | 0.113 | 0 | 0     | 0     | 0     |

|         |       |   |   |   |   |   |       |   |       |   |   |   |   |
|---------|-------|---|---|---|---|---|-------|---|-------|---|---|---|---|
| myom3   | 0.103 | 0 | 0 | 0 | 0 | 0 | 0.103 | 0 | 0.102 | 0 | 0 | 0 | 0 |
| magi1   | 0.103 | 0 | 0 | 0 | 0 | 0 | 0.103 | 0 | 0.112 | 0 | 0 | 0 | 0 |
| klhl24  | 0.103 | 0 | 0 | 0 | 0 | 0 | 0.103 | 0 | 0.109 | 0 | 0 | 0 | 0 |
| rab25   | 0.103 | 0 | 0 | 0 | 0 | 0 | 0.103 | 0 | 0.107 | 0 | 0 | 0 | 0 |
| lrrc24  | 0.1   | 0 | 0 | 0 | 0 | 0 | 0.1   | 0 | 0.11  | 0 | 0 | 0 | 0 |
| sept7   | 0.103 | 0 | 0 | 0 | 0 | 0 | 0.103 | 0 | 0.11  | 0 | 0 | 0 | 0 |
| rbm26   | 0.103 | 0 | 0 | 0 | 0 | 0 | 0.103 | 0 | 0.104 | 0 | 0 | 0 | 0 |
| exph5   | 0.103 | 0 | 0 | 0 | 0 | 0 | 0.103 | 0 | 0.102 | 0 | 0 | 0 | 0 |
| rgs22   | 0.102 | 0 | 0 | 0 | 0 | 0 | 0.102 | 0 | 0.103 | 0 | 0 | 0 | 0 |
| tulp3   | 0.102 | 0 | 0 | 0 | 0 | 0 | 0.102 | 0 | 0.103 | 0 | 0 | 0 | 0 |
| pdcl    | 0.104 | 0 | 0 | 0 | 0 | 0 | 0.104 | 0 | 0.104 | 0 | 0 | 0 | 0 |
| ngdn    | 0.104 | 0 | 0 | 0 | 0 | 0 | 0.104 | 0 | 0.108 | 0 | 0 | 0 | 0 |
| lin7a   | 0.102 | 0 | 0 | 0 | 0 | 0 | 0.102 | 0 | 0.106 | 0 | 0 | 0 | 0 |
| clca2   | 0.104 | 0 | 0 | 0 | 0 | 0 | 0.104 | 0 | 0.103 | 0 | 0 | 0 | 0 |
| cnot11  | 0.103 | 0 | 0 | 0 | 0 | 0 | 0.103 | 0 | 0.102 | 0 | 0 | 0 | 0 |
| ppp1cc  | 0.104 | 0 | 0 | 0 | 0 | 0 | 0.104 | 0 | 0.108 | 0 | 0 | 0 | 0 |
| ccnl2   | 0.102 | 0 | 0 | 0 | 0 | 0 | 0.102 | 0 | 0.113 | 0 | 0 | 0 | 0 |
| psd4    | 0.104 | 0 | 0 | 0 | 0 | 0 | 0.104 | 0 | 0.112 | 0 | 0 | 0 | 0 |
| gga2    | 0.104 | 0 | 0 | 0 | 0 | 0 | 0.104 | 0 | 0.142 | 0 | 0 | 0 | 0 |
| tpm3    | 0.104 | 0 | 0 | 0 | 0 | 0 | 0.104 | 0 | 0.103 | 0 | 0 | 0 | 0 |
| snap91  | 0.104 | 0 | 0 | 0 | 0 | 0 | 0.104 | 0 | 0.108 | 0 | 0 | 0 | 0 |
| palld   | 0.102 | 0 | 0 | 0 | 0 | 0 | 0.102 | 0 | 0.109 | 0 | 0 | 0 | 0 |
| gna11   | 0.142 | 0 | 0 | 0 | 0 | 0 | 0.142 | 0 | 0.142 | 0 | 0 | 0 | 0 |
| adrbk1  | 0.251 | 0 | 0 | 0 | 0 | 0 | 0.251 | 0 | 0.249 | 0 | 0 | 0 | 0 |
| pdgfrb  | 0.26  | 0 | 0 | 0 | 0 | 0 | 0.26  | 0 | 0.262 | 0 | 0 | 0 | 0 |
| gna15   | 0.142 | 0 | 0 | 0 | 0 | 0 | 0.142 | 0 | 0.145 | 0 | 0 | 0 | 0 |
| trdv1   | 0.261 | 0 | 0 | 0 | 0 | 0 | 0.261 | 0 | 0.265 | 0 | 0 | 0 | 0 |
| ephb2   | 0.141 | 0 | 0 | 0 | 0 | 0 | 0.141 | 0 | 0.142 | 0 | 0 | 0 | 0 |
| def6    | 0.25  | 0 | 0 | 0 | 0 | 0 | 0.25  | 0 | 0.255 | 0 | 0 | 0 | 0 |
| nox1    | 0.249 | 0 | 0 | 0 | 0 | 0 | 0.249 | 0 | 0.249 | 0 | 0 | 0 | 0 |
| ephb4   | 0.142 | 0 | 0 | 0 | 0 | 0 | 0.142 | 0 | 0.144 | 0 | 0 | 0 | 0 |
| ppp2r2b | 0.143 | 0 | 0 | 0 | 0 | 0 | 0.143 | 0 | 0.149 | 0 | 0 | 0 | 0 |
| gna14   | 0.142 | 0 | 0 | 0 | 0 | 0 | 0.142 | 0 | 0.143 | 0 | 0 | 0 | 0 |
| zbtb12  | 0.246 | 0 | 0 | 0 | 0 | 0 | 0.246 | 0 | 0.246 | 0 | 0 | 0 | 0 |
| sec14l3 | 0.249 | 0 | 0 | 0 | 0 | 0 | 0.249 | 0 | 0.245 | 0 | 0 | 0 | 0 |
| gnai1   | 0.142 | 0 | 0 | 0 | 0 | 0 | 0.142 | 0 | 0.142 | 0 | 0 | 0 | 0 |
| hace1   | 0.266 | 0 | 0 | 0 | 0 | 0 | 0.266 | 0 | 0.269 | 0 | 0 | 0 | 0 |
| tpm4    | 0.141 | 0 | 0 | 0 | 0 | 0 | 0.141 | 0 | 0.155 | 0 | 0 | 0 | 0 |
| pik3c2a | 0.278 | 0 | 0 | 0 | 0 | 0 | 0.278 | 0 | 0.275 | 0 | 0 | 0 | 0 |
| cep70   | 0.139 | 0 | 0 | 0 | 0 | 0 | 0.139 | 0 | 0.146 | 0 | 0 | 0 | 0 |
| ralgps2 | 0.139 | 0 | 0 | 0 | 0 | 0 | 0.139 | 0 | 0.148 | 0 | 0 | 0 | 0 |

|           |       |   |   |   |   |   |       |   |       |   |   |   |   |
|-----------|-------|---|---|---|---|---|-------|---|-------|---|---|---|---|
| adrbk2    | 0.139 | 0 | 0 | 0 | 0 | 0 | 0.139 | 0 | 0.14  | 0 | 0 | 0 | 0 |
| pcdhgc5   | 0.138 | 0 | 0 | 0 | 0 | 0 | 0.138 | 0 | 0.14  | 0 | 0 | 0 | 0 |
| grk5      | 0.199 | 0 | 0 | 0 | 0 | 0 | 0.199 | 0 | 0.197 | 0 | 0 | 0 | 0 |
| spef1     | 0.139 | 0 | 0 | 0 | 0 | 0 | 0.139 | 0 | 0.14  | 0 | 0 | 0 | 0 |
| gdi1      | 0.14  | 0 | 0 | 0 | 0 | 0 | 0.14  | 0 | 0.144 | 0 | 0 | 0 | 0 |
| myo1b     | 0.14  | 0 | 0 | 0 | 0 | 0 | 0.14  | 0 | 0.141 | 0 | 0 | 0 | 0 |
| nckap1l   | 0.273 | 0 | 0 | 0 | 0 | 0 | 0.273 | 0 | 0.275 | 0 | 0 | 0 | 0 |
| ffar2     | 0.14  | 0 | 0 | 0 | 0 | 0 | 0.14  | 0 | 0.138 | 0 | 0 | 0 | 0 |
| snx2      | 0.14  | 0 | 0 | 0 | 0 | 0 | 0.14  | 0 | 0.143 | 0 | 0 | 0 | 0 |
| tm2d1     | 0.275 | 0 | 0 | 0 | 0 | 0 | 0.275 | 0 | 0.274 | 0 | 0 | 0 | 0 |
| krtap1-1  | 0.245 | 0 | 0 | 0 | 0 | 0 | 0.245 | 0 | 0.24  | 0 | 0 | 0 | 0 |
| acta1     | 0.143 | 0 | 0 | 0 | 0 | 0 | 0.143 | 0 | 0.139 | 0 | 0 | 0 | 0 |
| ptpn13    | 0.151 | 0 | 0 | 0 | 0 | 0 | 0.151 | 0 | 0.153 | 0 | 0 | 0 | 0 |
| rgs16     | 0.151 | 0 | 0 | 0 | 0 | 0 | 0.151 | 0 | 0.151 | 0 | 0 | 0 | 0 |
| actn2     | 0.15  | 0 | 0 | 0 | 0 | 0 | 0.15  | 0 | 0.154 | 0 | 0 | 0 | 0 |
| kidins220 | 0.15  | 0 | 0 | 0 | 0 | 0 | 0.15  | 0 | 0.152 | 0 | 0 | 0 | 0 |
| arhgdib   | 0.243 | 0 | 0 | 0 | 0 | 0 | 0.243 | 0 | 0.245 | 0 | 0 | 0 | 0 |
| pyurf     | 0.149 | 0 | 0 | 0 | 0 | 0 | 0.149 | 0 | 0.148 | 0 | 0 | 0 | 0 |
| sdcbp     | 0.151 | 0 | 0 | 0 | 0 | 0 | 0.151 | 0 | 0.155 | 0 | 0 | 0 | 0 |
| pkn2      | 0.151 | 0 | 0 | 0 | 0 | 0 | 0.151 | 0 | 0.156 | 0 | 0 | 0 | 0 |
| rab41     | 0.152 | 0 | 0 | 0 | 0 | 0 | 0.152 | 0 | 0.153 | 0 | 0 | 0 | 0 |
| actn4     | 0.153 | 0 | 0 | 0 | 0 | 0 | 0.153 | 0 | 0.155 | 0 | 0 | 0 | 0 |
| rgs7bp    | 0.152 | 0 | 0 | 0 | 0 | 0 | 0.152 | 0 | 0.151 | 0 | 0 | 0 | 0 |
| ric8b     | 0.152 | 0 | 0 | 0 | 0 | 0 | 0.152 | 0 | 0.152 | 0 | 0 | 0 | 0 |
| rnd1      | 0.241 | 0 | 0 | 0 | 0 | 0 | 0.241 | 0 | 0.244 | 0 | 0 | 0 | 0 |
| rcc2      | 0.149 | 0 | 0 | 0 | 0 | 0 | 0.149 | 0 | 0.149 | 0 | 0 | 0 | 0 |
| sept14    | 0.148 | 0 | 0 | 0 | 0 | 0 | 0.148 | 0 | 0.15  | 0 | 0 | 0 | 0 |
| kank3     | 0.145 | 0 | 0 | 0 | 0 | 0 | 0.145 | 0 | 0.147 | 0 | 0 | 0 | 0 |
| arhgef25  | 0.243 | 0 | 0 | 0 | 0 | 0 | 0.243 | 0 | 0.246 | 0 | 0 | 0 | 0 |
| spata13   | 0.243 | 0 | 0 | 0 | 0 | 0 | 0.243 | 0 | 0.24  | 0 | 0 | 0 | 0 |
| ccm2      | 0.244 | 0 | 0 | 0 | 0 | 0 | 0.244 | 0 | 0.25  | 0 | 0 | 0 | 0 |
| ppp5c     | 0.144 | 0 | 0 | 0 | 0 | 0 | 0.144 | 0 | 0.143 | 0 | 0 | 0 | 0 |
| gid8      | 0.144 | 0 | 0 | 0 | 0 | 0 | 0.144 | 0 | 0.143 | 0 | 0 | 0 | 0 |
| kank4     | 0.145 | 0 | 0 | 0 | 0 | 0 | 0.145 | 0 | 0.147 | 0 | 0 | 0 | 0 |
| rgs13     | 0.145 | 0 | 0 | 0 | 0 | 0 | 0.145 | 0 | 0.144 | 0 | 0 | 0 | 0 |
| ibgc1     | 0.147 | 0 | 0 | 0 | 0 | 0 | 0.147 | 0 | 0.15  | 0 | 0 | 0 | 0 |
| rgs4      | 0.148 | 0 | 0 | 0 | 0 | 0 | 0.148 | 0 | 0.15  | 0 | 0 | 0 | 0 |
| efnb1     | 0.147 | 0 | 0 | 0 | 0 | 0 | 0.147 | 0 | 0.151 | 0 | 0 | 0 | 0 |
| rgs5      | 0.147 | 0 | 0 | 0 | 0 | 0 | 0.147 | 0 | 0.156 | 0 | 0 | 0 | 0 |
| eps8l3    | 0.146 | 0 | 0 | 0 | 0 | 0 | 0.146 | 0 | 0.146 | 0 | 0 | 0 | 0 |
| plekhg2   | 0.28  | 0 | 0 | 0 | 0 | 0 | 0.28  | 0 | 0.28  | 0 | 0 | 0 | 0 |

|              |       |   |   |   |   |   |       |   |       |   |   |   |   |
|--------------|-------|---|---|---|---|---|-------|---|-------|---|---|---|---|
| s1pr4        | 0.288 | 0 | 0 | 0 | 0 | 0 | 0.288 | 0 | 0.285 | 0 | 0 | 0 | 0 |
| tp73         | 0.134 | 0 | 0 | 0 | 0 | 0 | 0.134 | 0 | 0.134 | 0 | 0 | 0 | 0 |
| cyfip2       | 0.399 | 0 | 0 | 0 | 0 | 0 | 0.399 | 0 | 0.393 | 0 | 0 | 0 | 0 |
| kank2        | 0.134 | 0 | 0 | 0 | 0 | 0 | 0.134 | 0 | 0.136 | 0 | 0 | 0 | 0 |
| map3k3       | 0.133 | 0 | 0 | 0 | 0 | 0 | 0.133 | 0 | 0.134 | 0 | 0 | 0 | 0 |
| pdxp         | 0.405 | 0 | 0 | 0 | 0 | 0 | 0.405 | 0 | 0.398 | 0 | 0 | 0 | 0 |
| tiam2        | 0.402 | 0 | 0 | 0 | 0 | 0 | 0.402 | 0 | 0.399 | 0 | 0 | 0 | 0 |
| pskh1        | 0.134 | 0 | 0 | 0 | 0 | 0 | 0.134 | 0 | 0.142 | 0 | 0 | 0 | 0 |
| gnao1        | 0.134 | 0 | 0 | 0 | 0 | 0 | 0.134 | 0 | 0.134 | 0 | 0 | 0 | 0 |
| ampd2        | 0.135 | 0 | 0 | 0 | 0 | 0 | 0.135 | 0 | 0.137 | 0 | 0 | 0 | 0 |
| mical2       | 0.135 | 0 | 0 | 0 | 0 | 0 | 0.135 | 0 | 0.136 | 0 | 0 | 0 | 0 |
| rasa3        | 0.134 | 0 | 0 | 0 | 0 | 0 | 0.134 | 0 | 0.136 | 0 | 0 | 0 | 0 |
| plxnb3       | 0.368 | 0 | 0 | 0 | 0 | 0 | 0.368 | 0 | 0.363 | 0 | 0 | 0 | 0 |
| krtap11-1    | 0.381 | 0 | 0 | 0 | 0 | 0 | 0.381 | 0 | 0.376 | 0 | 0 | 0 | 0 |
| rala         | 0.374 | 0 | 0 | 0 | 0 | 0 | 0.374 | 0 | 0.376 | 0 | 0 | 0 | 0 |
| skap2        | 0.133 | 0 | 0 | 0 | 0 | 0 | 0.133 | 0 | 0.138 | 0 | 0 | 0 | 0 |
| arhgdia      | 0.408 | 0 | 0 | 0 | 0 | 0 | 0.408 | 0 | 0.407 | 0 | 0 | 0 | 0 |
| sphk1        | 0.132 | 0 | 0 | 0 | 0 | 0 | 0.132 | 0 | 0.132 | 0 | 0 | 0 | 0 |
| gnaz         | 0.132 | 0 | 0 | 0 | 0 | 0 | 0.132 | 0 | 0.132 | 0 | 0 | 0 | 0 |
| prps1p2      | 0.132 | 0 | 0 | 0 | 0 | 0 | 0.132 | 0 | 0.137 | 0 | 0 | 0 | 0 |
| noxo1        | 0.132 | 0 | 0 | 0 | 0 | 0 | 0.132 | 0 | 0.131 | 0 | 0 | 0 | 0 |
| gage2a       | 0.132 | 0 | 0 | 0 | 0 | 0 | 0.132 | 0 | 0.133 | 0 | 0 | 0 | 0 |
| rab6a        | 0.132 | 0 | 0 | 0 | 0 | 0 | 0.132 | 0 | 0.136 | 0 | 0 | 0 | 0 |
| rab11a       | 0.132 | 0 | 0 | 0 | 0 | 0 | 0.132 | 0 | 0.136 | 0 | 0 | 0 | 0 |
| gnai3        | 0.132 | 0 | 0 | 0 | 0 | 0 | 0.132 | 0 | 0.132 | 0 | 0 | 0 | 0 |
| rap2c        | 0.132 | 0 | 0 | 0 | 0 | 0 | 0.132 | 0 | 0.133 | 0 | 0 | 0 | 0 |
| mapre3       | 0.132 | 0 | 0 | 0 | 0 | 0 | 0.132 | 0 | 0.137 | 0 | 0 | 0 | 0 |
| smarcd2      | 0.41  | 0 | 0 | 0 | 0 | 0 | 0.41  | 0 | 0.403 | 0 | 0 | 0 | 0 |
| loc100128651 | 0.412 | 0 | 0 | 0 | 0 | 0 | 0.412 | 0 | 0.406 | 0 | 0 | 0 | 0 |
| clta         | 0.132 | 0 | 0 | 0 | 0 | 0 | 0.132 | 0 | 0.136 | 0 | 0 | 0 | 0 |
| arfgef1      | 0.135 | 0 | 0 | 0 | 0 | 0 | 0.135 | 0 | 0.15  | 0 | 0 | 0 | 0 |
| kank1        | 0.136 | 0 | 0 | 0 | 0 | 0 | 0.136 | 0 | 0.14  | 0 | 0 | 0 | 0 |
| rab7a        | 0.137 | 0 | 0 | 0 | 0 | 0 | 0.137 | 0 | 0.139 | 0 | 0 | 0 | 0 |
| cope         | 0.137 | 0 | 0 | 0 | 0 | 0 | 0.137 | 0 | 0.144 | 0 | 0 | 0 | 0 |
| ap2b1        | 0.137 | 0 | 0 | 0 | 0 | 0 | 0.137 | 0 | 0.137 | 0 | 0 | 0 | 0 |
| arhgef1      | 0.137 | 0 | 0 | 0 | 0 | 0 | 0.137 | 0 | 0.14  | 0 | 0 | 0 | 0 |
| icmt         | 0.299 | 0 | 0 | 0 | 0 | 0 | 0.299 | 0 | 0.298 | 0 | 0 | 0 | 0 |
| tspan13      | 0.292 | 0 | 0 | 0 | 0 | 0 | 0.292 | 0 | 0.292 | 0 | 0 | 0 | 0 |
| gng3         | 0.137 | 0 | 0 | 0 | 0 | 0 | 0.137 | 0 | 0.138 | 0 | 0 | 0 | 0 |
| asap3        | 0.138 | 0 | 0 | 0 | 0 | 0 | 0.138 | 0 | 0.137 | 0 | 0 | 0 | 0 |
| gnaq         | 0.138 | 0 | 0 | 0 | 0 | 0 | 0.138 | 0 | 0.138 | 0 | 0 | 0 | 0 |

|          |       |   |   |   |   |   |       |   |       |   |   |   |   |
|----------|-------|---|---|---|---|---|-------|---|-------|---|---|---|---|
| ptplad1  | 0.29  | 0 | 0 | 0 | 0 | 0 | 0.29  | 0 | 0.285 | 0 | 0 | 0 | 0 |
| acap1    | 0.138 | 0 | 0 | 0 | 0 | 0 | 0.138 | 0 | 0.145 | 0 | 0 | 0 | 0 |
| sh3gl1   | 0.138 | 0 | 0 | 0 | 0 | 0 | 0.138 | 0 | 0.14  | 0 | 0 | 0 | 0 |
| arhgef4  | 0.291 | 0 | 0 | 0 | 0 | 0 | 0.291 | 0 | 0.287 | 0 | 0 | 0 | 0 |
| pacsin2  | 0.3   | 0 | 0 | 0 | 0 | 0 | 0.3   | 0 | 0.298 | 0 | 0 | 0 | 0 |
| nek3     | 0.304 | 0 | 0 | 0 | 0 | 0 | 0.304 | 0 | 0.301 | 0 | 0 | 0 | 0 |
| ncf4     | 0.136 | 0 | 0 | 0 | 0 | 0 | 0.136 | 0 | 0.134 | 0 | 0 | 0 | 0 |
| rhod     | 0.136 | 0 | 0 | 0 | 0 | 0 | 0.136 | 0 | 0.142 | 0 | 0 | 0 | 0 |
| sgsm2    | 0.136 | 0 | 0 | 0 | 0 | 0 | 0.136 | 0 | 0.147 | 0 | 0 | 0 | 0 |
| als2     | 0.34  | 0 | 0 | 0 | 0 | 0 | 0.34  | 0 | 0.342 | 0 | 0 | 0 | 0 |
| tmod3    | 0.136 | 0 | 0 | 0 | 0 | 0 | 0.136 | 0 | 0.138 | 0 | 0 | 0 | 0 |
| s1pr3    | 0.353 | 0 | 0 | 0 | 0 | 0 | 0.353 | 0 | 0.353 | 0 | 0 | 0 | 0 |
| chn1     | 0.337 | 0 | 0 | 0 | 0 | 0 | 0.337 | 0 | 0.335 | 0 | 0 | 0 | 0 |
| rhoh     | 0.328 | 0 | 0 | 0 | 0 | 0 | 0.328 | 0 | 0.326 | 0 | 0 | 0 | 0 |
| lima1    | 0.137 | 0 | 0 | 0 | 0 | 0 | 0.137 | 0 | 0.153 | 0 | 0 | 0 | 0 |
| mcf2l    | 0.314 | 0 | 0 | 0 | 0 | 0 | 0.314 | 0 | 0.314 | 0 | 0 | 0 | 0 |
| ppp1r18  | 0.137 | 0 | 0 | 0 | 0 | 0 | 0.137 | 0 | 0.141 | 0 | 0 | 0 | 0 |
| akip1    | 0.319 | 0 | 0 | 0 | 0 | 0 | 0.319 | 0 | 0.316 | 0 | 0 | 0 | 0 |
| ccdc91   | 0.136 | 0 | 0 | 0 | 0 | 0 | 0.136 | 0 | 0.143 | 0 | 0 | 0 | 0 |
| dennd5a  | 0.154 | 0 | 0 | 0 | 0 | 0 | 0.154 | 0 | 0.16  | 0 | 0 | 0 | 0 |
| avl9     | 0.155 | 0 | 0 | 0 | 0 | 0 | 0.155 | 0 | 0.159 | 0 | 0 | 0 | 0 |
| rab28    | 0.179 | 0 | 0 | 0 | 0 | 0 | 0.179 | 0 | 0.179 | 0 | 0 | 0 | 0 |
| csag1    | 0.179 | 0 | 0 | 0 | 0 | 0 | 0.179 | 0 | 0.178 | 0 | 0 | 0 | 0 |
| lpar2    | 0.179 | 0 | 0 | 0 | 0 | 0 | 0.179 | 0 | 0.183 | 0 | 0 | 0 | 0 |
| shb      | 0.178 | 0 | 0 | 0 | 0 | 0 | 0.178 | 0 | 0.18  | 0 | 0 | 0 | 0 |
| pik3ip1  | 0.178 | 0 | 0 | 0 | 0 | 0 | 0.178 | 0 | 0.174 | 0 | 0 | 0 | 0 |
| arhgap5  | 0.178 | 0 | 0 | 0 | 0 | 0 | 0.178 | 0 | 0.183 | 0 | 0 | 0 | 0 |
| inpp5j   | 0.181 | 0 | 0 | 0 | 0 | 0 | 0.181 | 0 | 0.184 | 0 | 0 | 0 | 0 |
| mical1   | 0.182 | 0 | 0 | 0 | 0 | 0 | 0.182 | 0 | 0.18  | 0 | 0 | 0 | 0 |
| rasgrp2  | 0.187 | 0 | 0 | 0 | 0 | 0 | 0.187 | 0 | 0.185 | 0 | 0 | 0 | 0 |
| rgl2     | 0.187 | 0 | 0 | 0 | 0 | 0 | 0.187 | 0 | 0.189 | 0 | 0 | 0 | 0 |
| arhgap22 | 0.186 | 0 | 0 | 0 | 0 | 0 | 0.186 | 0 | 0.186 | 0 | 0 | 0 | 0 |
| bzw1     | 0.215 | 0 | 0 | 0 | 0 | 0 | 0.215 | 0 | 0.213 | 0 | 0 | 0 | 0 |
| gpsm1    | 0.183 | 0 | 0 | 0 | 0 | 0 | 0.183 | 0 | 0.189 | 0 | 0 | 0 | 0 |
| fcho1    | 0.185 | 0 | 0 | 0 | 0 | 0 | 0.185 | 0 | 0.197 | 0 | 0 | 0 | 0 |
| efna1    | 0.177 | 0 | 0 | 0 | 0 | 0 | 0.177 | 0 | 0.18  | 0 | 0 | 0 | 0 |
| ehd2     | 0.176 | 0 | 0 | 0 | 0 | 0 | 0.176 | 0 | 0.181 | 0 | 0 | 0 | 0 |
| dgkz     | 0.223 | 0 | 0 | 0 | 0 | 0 | 0.223 | 0 | 0.236 | 0 | 0 | 0 | 0 |
| rapgef3  | 0.172 | 0 | 0 | 0 | 0 | 0 | 0.172 | 0 | 0.175 | 0 | 0 | 0 | 0 |
| eps8l2   | 0.172 | 0 | 0 | 0 | 0 | 0 | 0.172 | 0 | 0.171 | 0 | 0 | 0 | 0 |
| plxnb2   | 0.171 | 0 | 0 | 0 | 0 | 0 | 0.171 | 0 | 0.17  | 0 | 0 | 0 | 0 |

|          |       |   |   |   |   |   |       |   |       |   |   |   |   |
|----------|-------|---|---|---|---|---|-------|---|-------|---|---|---|---|
| grk6     | 0.171 | 0 | 0 | 0 | 0 | 0 | 0.171 | 0 | 0.169 | 0 | 0 | 0 | 0 |
| zfyve20  | 0.171 | 0 | 0 | 0 | 0 | 0 | 0.171 | 0 | 0.171 | 0 | 0 | 0 | 0 |
| gnb1     | 0.223 | 0 | 0 | 0 | 0 | 0 | 0.223 | 0 | 0.227 | 0 | 0 | 0 | 0 |
| plcb2    | 0.221 | 0 | 0 | 0 | 0 | 0 | 0.221 | 0 | 0.221 | 0 | 0 | 0 | 0 |
| ccdc125  | 0.174 | 0 | 0 | 0 | 0 | 0 | 0.174 | 0 | 0.175 | 0 | 0 | 0 | 0 |
| ric8a    | 0.175 | 0 | 0 | 0 | 0 | 0 | 0.175 | 0 | 0.176 | 0 | 0 | 0 | 0 |
| ptk2     | 0.172 | 0 | 0 | 0 | 0 | 0 | 0.172 | 0 | 0.17  | 0 | 0 | 0 | 0 |
| dst      | 0.172 | 0 | 0 | 0 | 0 | 0 | 0.172 | 0 | 0.173 | 0 | 0 | 0 | 0 |
| tubb2b   | 0.217 | 0 | 0 | 0 | 0 | 0 | 0.217 | 0 | 0.217 | 0 | 0 | 0 | 0 |
| sema5a   | 0.214 | 0 | 0 | 0 | 0 | 0 | 0.214 | 0 | 0.216 | 0 | 0 | 0 | 0 |
| pea15    | 0.187 | 0 | 0 | 0 | 0 | 0 | 0.187 | 0 | 0.189 | 0 | 0 | 0 | 0 |
| ssx2ip   | 0.194 | 0 | 0 | 0 | 0 | 0 | 0.194 | 0 | 0.198 | 0 | 0 | 0 | 0 |
| flad1    | 0.203 | 0 | 0 | 0 | 0 | 0 | 0.203 | 0 | 0.199 | 0 | 0 | 0 | 0 |
| pik3r5   | 0.206 | 0 | 0 | 0 | 0 | 0 | 0.206 | 0 | 0.202 | 0 | 0 | 0 | 0 |
| rab12    | 0.207 | 0 | 0 | 0 | 0 | 0 | 0.207 | 0 | 0.207 | 0 | 0 | 0 | 0 |
| gpsm3    | 0.192 | 0 | 0 | 0 | 0 | 0 | 0.192 | 0 | 0.193 | 0 | 0 | 0 | 0 |
| cthrcl   | 0.207 | 0 | 0 | 0 | 0 | 0 | 0.207 | 0 | 0.215 | 0 | 0 | 0 | 0 |
| pik3cg   | 0.194 | 0 | 0 | 0 | 0 | 0 | 0.194 | 0 | 0.19  | 0 | 0 | 0 | 0 |
| dennd6a  | 0.199 | 0 | 0 | 0 | 0 | 0 | 0.199 | 0 | 0.202 | 0 | 0 | 0 | 0 |
| nfyf     | 0.198 | 0 | 0 | 0 | 0 | 0 | 0.198 | 0 | 0.198 | 0 | 0 | 0 | 0 |
| s1pr5    | 0.198 | 0 | 0 | 0 | 0 | 0 | 0.198 | 0 | 0.197 | 0 | 0 | 0 | 0 |
| pfn1     | 0.196 | 0 | 0 | 0 | 0 | 0 | 0.196 | 0 | 0.197 | 0 | 0 | 0 | 0 |
| gpr124   | 0.195 | 0 | 0 | 0 | 0 | 0 | 0.195 | 0 | 0.192 | 0 | 0 | 0 | 0 |
| rgs1     | 0.199 | 0 | 0 | 0 | 0 | 0 | 0.199 | 0 | 0.199 | 0 | 0 | 0 | 0 |
| gng2     | 0.208 | 0 | 0 | 0 | 0 | 0 | 0.208 | 0 | 0.208 | 0 | 0 | 0 | 0 |
| rgp1     | 0.192 | 0 | 0 | 0 | 0 | 0 | 0.192 | 0 | 0.197 | 0 | 0 | 0 | 0 |
| als2cl   | 0.214 | 0 | 0 | 0 | 0 | 0 | 0.214 | 0 | 0.222 | 0 | 0 | 0 | 0 |
| znf709   | 0.19  | 0 | 0 | 0 | 0 | 0 | 0.19  | 0 | 0.188 | 0 | 0 | 0 | 0 |
| arhgef28 | 0.19  | 0 | 0 | 0 | 0 | 0 | 0.19  | 0 | 0.19  | 0 | 0 | 0 | 0 |
| mir142   | 0.189 | 0 | 0 | 0 | 0 | 0 | 0.189 | 0 | 0.185 | 0 | 0 | 0 | 0 |
| lpar1    | 0.188 | 0 | 0 | 0 | 0 | 0 | 0.188 | 0 | 0.189 | 0 | 0 | 0 | 0 |
| gnb4     | 0.188 | 0 | 0 | 0 | 0 | 0 | 0.188 | 0 | 0.188 | 0 | 0 | 0 | 0 |
| prps1l1  | 0.19  | 0 | 0 | 0 | 0 | 0 | 0.19  | 0 | 0.189 | 0 | 0 | 0 | 0 |
| sipa1    | 0.191 | 0 | 0 | 0 | 0 | 0 | 0.191 | 0 | 0.194 | 0 | 0 | 0 | 0 |
| plxnb1   | 0.191 | 0 | 0 | 0 | 0 | 0 | 0.191 | 0 | 0.193 | 0 | 0 | 0 | 0 |
| tbc1d10b | 0.208 | 0 | 0 | 0 | 0 | 0 | 0.208 | 0 | 0.215 | 0 | 0 | 0 | 0 |
| vasp     | 0.209 | 0 | 0 | 0 | 0 | 0 | 0.209 | 0 | 0.211 | 0 | 0 | 0 | 0 |
| dscr8    | 0.212 | 0 | 0 | 0 | 0 | 0 | 0.212 | 0 | 0.214 | 0 | 0 | 0 | 0 |
| pik3r6   | 0.213 | 0 | 0 | 0 | 0 | 0 | 0.213 | 0 | 0.21  | 0 | 0 | 0 | 0 |
| nfyb     | 0.171 | 0 | 0 | 0 | 0 | 0 | 0.171 | 0 | 0.17  | 0 | 0 | 0 | 0 |
| ccser2   | 0.17  | 0 | 0 | 0 | 0 | 0 | 0.17  | 0 | 0.169 | 0 | 0 | 0 | 0 |

|           |       |   |   |   |   |   |       |   |       |   |   |   |   |
|-----------|-------|---|---|---|---|---|-------|---|-------|---|---|---|---|
| smpx      | 0.235 | 0 | 0 | 0 | 0 | 0 | 0.235 | 0 | 0.281 | 0 | 0 | 0 | 0 |
| coro1c    | 0.16  | 0 | 0 | 0 | 0 | 0 | 0.16  | 0 | 0.167 | 0 | 0 | 0 | 0 |
| iggap1    | 0.159 | 0 | 0 | 0 | 0 | 0 | 0.159 | 0 | 0.162 | 0 | 0 | 0 | 0 |
| znf644    | 0.158 | 0 | 0 | 0 | 0 | 0 | 0.158 | 0 | 0.159 | 0 | 0 | 0 | 0 |
| fhod1     | 0.236 | 0 | 0 | 0 | 0 | 0 | 0.236 | 0 | 0.232 | 0 | 0 | 0 | 0 |
| nox5      | 0.158 | 0 | 0 | 0 | 0 | 0 | 0.158 | 0 | 0.159 | 0 | 0 | 0 | 0 |
| iggap2    | 0.16  | 0 | 0 | 0 | 0 | 0 | 0.16  | 0 | 0.163 | 0 | 0 | 0 | 0 |
| rab1b     | 0.234 | 0 | 0 | 0 | 0 | 0 | 0.234 | 0 | 0.238 | 0 | 0 | 0 | 0 |
| copa      | 0.162 | 0 | 0 | 0 | 0 | 0 | 0.162 | 0 | 0.17  | 0 | 0 | 0 | 0 |
| nrxp1     | 0.163 | 0 | 0 | 0 | 0 | 0 | 0.163 | 0 | 0.165 | 0 | 0 | 0 | 0 |
| trip11    | 0.162 | 0 | 0 | 0 | 0 | 0 | 0.162 | 0 | 0.165 | 0 | 0 | 0 | 0 |
| schip1    | 0.161 | 0 | 0 | 0 | 0 | 0 | 0.161 | 0 | 0.167 | 0 | 0 | 0 | 0 |
| slc6a7    | 0.16  | 0 | 0 | 0 | 0 | 0 | 0.16  | 0 | 0.167 | 0 | 0 | 0 | 0 |
| myadm     | 0.233 | 0 | 0 | 0 | 0 | 0 | 0.233 | 0 | 0.232 | 0 | 0 | 0 | 0 |
| smap1     | 0.236 | 0 | 0 | 0 | 0 | 0 | 0.236 | 0 | 0.239 | 0 | 0 | 0 | 0 |
| snx1      | 0.158 | 0 | 0 | 0 | 0 | 0 | 0.158 | 0 | 0.166 | 0 | 0 | 0 | 0 |
| prex2     | 0.238 | 0 | 0 | 0 | 0 | 0 | 0.238 | 0 | 0.236 | 0 | 0 | 0 | 0 |
| chchd2    | 0.237 | 0 | 0 | 0 | 0 | 0 | 0.237 | 0 | 0.237 | 0 | 0 | 0 | 0 |
| gna12     | 0.155 | 0 | 0 | 0 | 0 | 0 | 0.155 | 0 | 0.156 | 0 | 0 | 0 | 0 |
| s1pr1     | 0.24  | 0 | 0 | 0 | 0 | 0 | 0.24  | 0 | 0.24  | 0 | 0 | 0 | 0 |
| rgs8      | 0.155 | 0 | 0 | 0 | 0 | 0 | 0.155 | 0 | 0.155 | 0 | 0 | 0 | 0 |
| ppp1r9b   | 0.155 | 0 | 0 | 0 | 0 | 0 | 0.155 | 0 | 0.157 | 0 | 0 | 0 | 0 |
| gdpd2     | 0.156 | 0 | 0 | 0 | 0 | 0 | 0.156 | 0 | 0.158 | 0 | 0 | 0 | 0 |
| lphn1     | 0.156 | 0 | 0 | 0 | 0 | 0 | 0.156 | 0 | 0.158 | 0 | 0 | 0 | 0 |
| rab11fip2 | 0.156 | 0 | 0 | 0 | 0 | 0 | 0.156 | 0 | 0.161 | 0 | 0 | 0 | 0 |
| fscn1     | 0.157 | 0 | 0 | 0 | 0 | 0 | 0.157 | 0 | 0.166 | 0 | 0 | 0 | 0 |
| plek2     | 0.236 | 0 | 0 | 0 | 0 | 0 | 0.236 | 0 | 0.233 | 0 | 0 | 0 | 0 |
| plekhg4   | 0.237 | 0 | 0 | 0 | 0 | 0 | 0.237 | 0 | 0.24  | 0 | 0 | 0 | 0 |
| tbc1d21   | 0.156 | 0 | 0 | 0 | 0 | 0 | 0.156 | 0 | 0.164 | 0 | 0 | 0 | 0 |
| prr5      | 0.233 | 0 | 0 | 0 | 0 | 0 | 0.233 | 0 | 0.234 | 0 | 0 | 0 | 0 |
| arcn1     | 0.163 | 0 | 0 | 0 | 0 | 0 | 0.163 | 0 | 0.169 | 0 | 0 | 0 | 0 |
| ptprh     | 0.166 | 0 | 0 | 0 | 0 | 0 | 0.166 | 0 | 0.167 | 0 | 0 | 0 | 0 |
| lpar3     | 0.166 | 0 | 0 | 0 | 0 | 0 | 0.166 | 0 | 0.171 | 0 | 0 | 0 | 0 |
| s1pr2     | 0.227 | 0 | 0 | 0 | 0 | 0 | 0.227 | 0 | 0.228 | 0 | 0 | 0 | 0 |
| raph1     | 0.228 | 0 | 0 | 0 | 0 | 0 | 0.228 | 0 | 0.234 | 0 | 0 | 0 | 0 |
| arap2     | 0.23  | 0 | 0 | 0 | 0 | 0 | 0.23  | 0 | 0.237 | 0 | 0 | 0 | 0 |
| plcb1     | 0.166 | 0 | 0 | 0 | 0 | 0 | 0.166 | 0 | 0.168 | 0 | 0 | 0 | 0 |
| eps8l1    | 0.166 | 0 | 0 | 0 | 0 | 0 | 0.166 | 0 | 0.167 | 0 | 0 | 0 | 0 |
| diaph3    | 0.167 | 0 | 0 | 0 | 0 | 0 | 0.167 | 0 | 0.167 | 0 | 0 | 0 | 0 |
| ppp1cb    | 0.168 | 0 | 0 | 0 | 0 | 0 | 0.168 | 0 | 0.169 | 0 | 0 | 0 | 0 |
| or4f6     | 0.225 | 0 | 0 | 0 | 0 | 0 | 0.225 | 0 | 0.22  | 0 | 0 | 0 | 0 |

|          |       |   |   |   |   |   |       |   |       |   |   |   |   |
|----------|-------|---|---|---|---|---|-------|---|-------|---|---|---|---|
| gna13    | 0.168 | 0 | 0 | 0 | 0 | 0 | 0.168 | 0 | 0.168 | 0 | 0 | 0 | 0 |
| pip5k1b  | 0.225 | 0 | 0 | 0 | 0 | 0 | 0.225 | 0 | 0.224 | 0 | 0 | 0 | 0 |
| nol12    | 0.168 | 0 | 0 | 0 | 0 | 0 | 0.168 | 0 | 0.182 | 0 | 0 | 0 | 0 |
| rabif    | 0.165 | 0 | 0 | 0 | 0 | 0 | 0.165 | 0 | 0.166 | 0 | 0 | 0 | 0 |
| rac1p2   | 0.231 | 0 | 0 | 0 | 0 | 0 | 0.231 | 0 | 0.235 | 0 | 0 | 0 | 0 |
| sec14l4  | 0.164 | 0 | 0 | 0 | 0 | 0 | 0.164 | 0 | 0.161 | 0 | 0 | 0 | 0 |
| plekha2  | 0.231 | 0 | 0 | 0 | 0 | 0 | 0.231 | 0 | 0.229 | 0 | 0 | 0 | 0 |
| capn6    | 0.164 | 0 | 0 | 0 | 0 | 0 | 0.164 | 0 | 0.162 | 0 | 0 | 0 | 0 |
| usp6     | 0.164 | 0 | 0 | 0 | 0 | 0 | 0.164 | 0 | 0.179 | 0 | 0 | 0 | 0 |
| dock3    | 0.233 | 0 | 0 | 0 | 0 | 0 | 0.233 | 0 | 0.229 | 0 | 0 | 0 | 0 |
| pik3cd   | 0.163 | 0 | 0 | 0 | 0 | 0 | 0.163 | 0 | 0.162 | 0 | 0 | 0 | 0 |
| dapp1    | 0.164 | 0 | 0 | 0 | 0 | 0 | 0.164 | 0 | 0.164 | 0 | 0 | 0 | 0 |
| tspan5   | 0.231 | 0 | 0 | 0 | 0 | 0 | 0.231 | 0 | 0.227 | 0 | 0 | 0 | 0 |
| capns1   | 0.105 | 0 | 0 | 0 | 0 | 0 | 0.105 | 0 | 0.112 | 0 | 0 | 0 | 0 |
| plcb3    | 0.165 | 0 | 0 | 0 | 0 | 0 | 0.165 | 0 | 0.166 | 0 | 0 | 0 | 0 |
| rac1p3   | 0.231 | 0 | 0 | 0 | 0 | 0 | 0.231 | 0 | 0.235 | 0 | 0 | 0 | 0 |
| rac1p5   | 0.231 | 0 | 0 | 0 | 0 | 0 | 0.231 | 0 | 0.235 | 0 | 0 | 0 | 0 |
| rac1p4   | 0.231 | 0 | 0 | 0 | 0 | 0 | 0.231 | 0 | 0.235 | 0 | 0 | 0 | 0 |
| nox1     | 0.131 | 0 | 0 | 0 | 0 | 0 | 0.131 | 0 | 0.129 | 0 | 0 | 0 | 0 |
| cep85l   | 0.138 | 0 | 0 | 0 | 0 | 0 | 0.138 | 0 | 0.136 | 0 | 0 | 0 | 0 |
| app12    | 0.117 | 0 | 0 | 0 | 0 | 0 | 0.117 | 0 | 0.127 | 0 | 0 | 0 | 0 |
| gsn      | 0.117 | 0 | 0 | 0 | 0 | 0 | 0.117 | 0 | 0.117 | 0 | 0 | 0 | 0 |
| mtmr1    | 0.118 | 0 | 0 | 0 | 0 | 0 | 0.118 | 0 | 0.12  | 0 | 0 | 0 | 0 |
| ccdc41   | 0.117 | 0 | 0 | 0 | 0 | 0 | 0.117 | 0 | 0.127 | 0 | 0 | 0 | 0 |
| arhgef3  | 0.117 | 0 | 0 | 0 | 0 | 0 | 0.117 | 0 | 0.116 | 0 | 0 | 0 | 0 |
| eps15    | 0.116 | 0 | 0 | 0 | 0 | 0 | 0.116 | 0 | 0.139 | 0 | 0 | 0 | 0 |
| adam20p1 | 0.116 | 0 | 0 | 0 | 0 | 0 | 0.116 | 0 | 0.115 | 0 | 0 | 0 | 0 |
| rab33b   | 0.117 | 0 | 0 | 0 | 0 | 0 | 0.117 | 0 | 0.128 | 0 | 0 | 0 | 0 |
| rab6b    | 0.118 | 0 | 0 | 0 | 0 | 0 | 0.118 | 0 | 0.126 | 0 | 0 | 0 | 0 |
| sphk2    | 0.118 | 0 | 0 | 0 | 0 | 0 | 0.118 | 0 | 0.119 | 0 | 0 | 0 | 0 |
| ophn1    | 0.118 | 0 | 0 | 0 | 0 | 0 | 0.118 | 0 | 0.126 | 0 | 0 | 0 | 0 |
| gnai2    | 0.118 | 0 | 0 | 0 | 0 | 0 | 0.118 | 0 | 0.119 | 0 | 0 | 0 | 0 |
| rapgef1  | 0.118 | 0 | 0 | 0 | 0 | 0 | 0.118 | 0 | 0.12  | 0 | 0 | 0 | 0 |
| g3bp1    | 0.118 | 0 | 0 | 0 | 0 | 0 | 0.118 | 0 | 0.128 | 0 | 0 | 0 | 0 |
| scyl2    | 0.118 | 0 | 0 | 0 | 0 | 0 | 0.118 | 0 | 0.12  | 0 | 0 | 0 | 0 |
| rxfp4    | 0.118 | 0 | 0 | 0 | 0 | 0 | 0.118 | 0 | 0.116 | 0 | 0 | 0 | 0 |
| bri3     | 0.118 | 0 | 0 | 0 | 0 | 0 | 0.118 | 0 | 0.123 | 0 | 0 | 0 | 0 |
| elmod1   | 0.116 | 0 | 0 | 0 | 0 | 0 | 0.116 | 0 | 0.123 | 0 | 0 | 0 | 0 |
| rps6kc1  | 0.116 | 0 | 0 | 0 | 0 | 0 | 0.116 | 0 | 0.116 | 0 | 0 | 0 | 0 |
| coro1b   | 0.113 | 0 | 0 | 0 | 0 | 0 | 0.113 | 0 | 0.113 | 0 | 0 | 0 | 0 |
| gmfg     | 0.114 | 0 | 0 | 0 | 0 | 0 | 0.114 | 0 | 0.116 | 0 | 0 | 0 | 0 |

|           |       |   |   |   |   |   |       |   |       |   |   |   |   |
|-----------|-------|---|---|---|---|---|-------|---|-------|---|---|---|---|
| trav6     | 0.114 | 0 | 0 | 0 | 0 | 0 | 0.114 | 0 | 0.117 | 0 | 0 | 0 | 0 |
| tuba8     | 0.113 | 0 | 0 | 0 | 0 | 0 | 0.113 | 0 | 0.119 | 0 | 0 | 0 | 0 |
| nol6      | 0.113 | 0 | 0 | 0 | 0 | 0 | 0.113 | 0 | 0.123 | 0 | 0 | 0 | 0 |
| EIF3J     | 0.113 | 0 | 0 | 0 | 0 | 0 | 0.113 | 0 | 0.115 | 0 | 0 | 0 | 0 |
| rab5b     | 0.113 | 0 | 0 | 0 | 0 | 0 | 0.113 | 0 | 0.133 | 0 | 0 | 0 | 0 |
| ptpn3     | 0.114 | 0 | 0 | 0 | 0 | 0 | 0.114 | 0 | 0.12  | 0 | 0 | 0 | 0 |
| pik3c2g   | 0.114 | 0 | 0 | 0 | 0 | 0 | 0.114 | 0 | 0.114 | 0 | 0 | 0 | 0 |
| ndufaf5   | 0.116 | 0 | 0 | 0 | 0 | 0 | 0.116 | 0 | 0.119 | 0 | 0 | 0 | 0 |
| cltcl1    | 0.116 | 0 | 0 | 0 | 0 | 0 | 0.116 | 0 | 0.121 | 0 | 0 | 0 | 0 |
| prr5l     | 0.116 | 0 | 0 | 0 | 0 | 0 | 0.116 | 0 | 0.116 | 0 | 0 | 0 | 0 |
| dcbl2     | 0.115 | 0 | 0 | 0 | 0 | 0 | 0.115 | 0 | 0.119 | 0 | 0 | 0 | 0 |
| mir23b    | 0.115 | 0 | 0 | 0 | 0 | 0 | 0.115 | 0 | 0.119 | 0 | 0 | 0 | 0 |
| emr3      | 0.114 | 0 | 0 | 0 | 0 | 0 | 0.114 | 0 | 0.114 | 0 | 0 | 0 | 0 |
| gage2c    | 0.114 | 0 | 0 | 0 | 0 | 0 | 0.114 | 0 | 0.125 | 0 | 0 | 0 | 0 |
| ptafr     | 0.119 | 0 | 0 | 0 | 0 | 0 | 0.119 | 0 | 0.117 | 0 | 0 | 0 | 0 |
| tbc1d13   | 0.119 | 0 | 0 | 0 | 0 | 0 | 0.119 | 0 | 0.123 | 0 | 0 | 0 | 0 |
| nrg3-as1  | 0.122 | 0 | 0 | 0 | 0 | 0 | 0.122 | 0 | 0.124 | 0 | 0 | 0 | 0 |
| zswim8    | 0.122 | 0 | 0 | 0 | 0 | 0 | 0.122 | 0 | 0.124 | 0 | 0 | 0 | 0 |
| fam65c    | 0.122 | 0 | 0 | 0 | 0 | 0 | 0.122 | 0 | 0.124 | 0 | 0 | 0 | 0 |
| cdrt15p2  | 0.122 | 0 | 0 | 0 | 0 | 0 | 0.122 | 0 | 0.124 | 0 | 0 | 0 | 0 |
| EIF4G1    | 0.122 | 0 | 0 | 0 | 0 | 0 | 0.122 | 0 | 0.123 | 0 | 0 | 0 | 0 |
| ptpn1     | 0.122 | 0 | 0 | 0 | 0 | 0 | 0.122 | 0 | 0.124 | 0 | 0 | 0 | 0 |
| frmpd1    | 0.122 | 0 | 0 | 0 | 0 | 0 | 0.122 | 0 | 0.127 | 0 | 0 | 0 | 0 |
| obscn     | 0.122 | 0 | 0 | 0 | 0 | 0 | 0.122 | 0 | 0.125 | 0 | 0 | 0 | 0 |
| cass4     | 0.123 | 0 | 0 | 0 | 0 | 0 | 0.123 | 0 | 0.12  | 0 | 0 | 0 | 0 |
| ppp1r8    | 0.123 | 0 | 0 | 0 | 0 | 0 | 0.123 | 0 | 0.124 | 0 | 0 | 0 | 0 |
| rac2      | 0.539 | 0 | 0 | 0 | 0 | 0 | 0.539 | 0 | 0.532 | 0 | 0 | 0 | 0 |
| arhgap19  | 0.124 | 0 | 0 | 0 | 0 | 0 | 0.124 | 0 | 0.127 | 0 | 0 | 0 | 0 |
| spire1    | 0.124 | 0 | 0 | 0 | 0 | 0 | 0.124 | 0 | 0.125 | 0 | 0 | 0 | 0 |
| gramd4    | 0.124 | 0 | 0 | 0 | 0 | 0 | 0.124 | 0 | 0.124 | 0 | 0 | 0 | 0 |
| rgs14     | 0.123 | 0 | 0 | 0 | 0 | 0 | 0.123 | 0 | 0.128 | 0 | 0 | 0 | 0 |
| clsrp     | 0.123 | 0 | 0 | 0 | 0 | 0 | 0.123 | 0 | 0.131 | 0 | 0 | 0 | 0 |
| ITGB4     | 0.123 | 0 | 0 | 0 | 0 | 0 | 0.123 | 0 | 0.124 | 0 | 0 | 0 | 0 |
| sipa1l2   | 0.122 | 0 | 0 | 0 | 0 | 0 | 0.122 | 0 | 0.128 | 0 | 0 | 0 | 0 |
| afap1l2   | 0.122 | 0 | 0 | 0 | 0 | 0 | 0.122 | 0 | 0.121 | 0 | 0 | 0 | 0 |
| tpm3p4    | 0.12  | 0 | 0 | 0 | 0 | 0 | 0.12  | 0 | 0.118 | 0 | 0 | 0 | 0 |
| tpm3p7    | 0.12  | 0 | 0 | 0 | 0 | 0 | 0.12  | 0 | 0.118 | 0 | 0 | 0 | 0 |
| loc751603 | 0.12  | 0 | 0 | 0 | 0 | 0 | 0.12  | 0 | 0.118 | 0 | 0 | 0 | 0 |
| tpm3p8    | 0.12  | 0 | 0 | 0 | 0 | 0 | 0.12  | 0 | 0.118 | 0 | 0 | 0 | 0 |
| tpm3p6    | 0.12  | 0 | 0 | 0 | 0 | 0 | 0.12  | 0 | 0.118 | 0 | 0 | 0 | 0 |
| macc1     | 0.12  | 0 | 0 | 0 | 0 | 0 | 0.12  | 0 | 0.123 | 0 | 0 | 0 | 0 |

|           |       |   |   |   |   |   |       |   |       |   |   |   |   |
|-----------|-------|---|---|---|---|---|-------|---|-------|---|---|---|---|
| ppp2r5c   | 0.12  | 0 | 0 | 0 | 0 | 0 | 0.12  | 0 | 0.126 | 0 | 0 | 0 | 0 |
| loc751602 | 0.12  | 0 | 0 | 0 | 0 | 0 | 0.12  | 0 | 0.118 | 0 | 0 | 0 | 0 |
| tpm3p5    | 0.12  | 0 | 0 | 0 | 0 | 0 | 0.12  | 0 | 0.118 | 0 | 0 | 0 | 0 |
| efnb2     | 0.121 | 0 | 0 | 0 | 0 | 0 | 0.121 | 0 | 0.123 | 0 | 0 | 0 | 0 |
| grb7      | 0.121 | 0 | 0 | 0 | 0 | 0 | 0.121 | 0 | 0.122 | 0 | 0 | 0 | 0 |
| copz1     | 0.121 | 0 | 0 | 0 | 0 | 0 | 0.121 | 0 | 0.123 | 0 | 0 | 0 | 0 |
| evl       | 0.121 | 0 | 0 | 0 | 0 | 0 | 0.121 | 0 | 0.125 | 0 | 0 | 0 | 0 |
| myoz3     | 0.12  | 0 | 0 | 0 | 0 | 0 | 0.12  | 0 | 0.116 | 0 | 0 | 0 | 0 |
| asb9      | 0.12  | 0 | 0 | 0 | 0 | 0 | 0.12  | 0 | 0.118 | 0 | 0 | 0 | 0 |
| coro1a    | 0.12  | 0 | 0 | 0 | 0 | 0 | 0.12  | 0 | 0.121 | 0 | 0 | 0 | 0 |
| specc1    | 0.113 | 0 | 0 | 0 | 0 | 0 | 0.113 | 0 | 0.12  | 0 | 0 | 0 | 0 |
| arl8a     | 0.113 | 0 | 0 | 0 | 0 | 0 | 0.113 | 0 | 0.124 | 0 | 0 | 0 | 0 |
| rgs11     | 0.108 | 0 | 0 | 0 | 0 | 0 | 0.108 | 0 | 0.109 | 0 | 0 | 0 | 0 |
| myl5      | 0.108 | 0 | 0 | 0 | 0 | 0 | 0.108 | 0 | 0.106 | 0 | 0 | 0 | 0 |
| lrrc4b    | 0.108 | 0 | 0 | 0 | 0 | 0 | 0.108 | 0 | 0.114 | 0 | 0 | 0 | 0 |
| mir138-2  | 0.108 | 0 | 0 | 0 | 0 | 0 | 0.108 | 0 | 0.119 | 0 | 0 | 0 | 0 |
| pabpc1    | 0.108 | 0 | 0 | 0 | 0 | 0 | 0.108 | 0 | 0.11  | 0 | 0 | 0 | 0 |
| mkln1     | 0.108 | 0 | 0 | 0 | 0 | 0 | 0.108 | 0 | 0.113 | 0 | 0 | 0 | 0 |
| gnb2l1    | 0.108 | 0 | 0 | 0 | 0 | 0 | 0.108 | 0 | 0.108 | 0 | 0 | 0 | 0 |
| lox       | 0.108 | 0 | 0 | 0 | 0 | 0 | 0.108 | 0 | 0.113 | 0 | 0 | 0 | 0 |
| nol8      | 0.108 | 0 | 0 | 0 | 0 | 0 | 0.108 | 0 | 0.118 | 0 | 0 | 0 | 0 |
| epha3     | 0.108 | 0 | 0 | 0 | 0 | 0 | 0.108 | 0 | 0.112 | 0 | 0 | 0 | 0 |
| farp2     | 0.109 | 0 | 0 | 0 | 0 | 0 | 0.109 | 0 | 0.114 | 0 | 0 | 0 | 0 |
| cltb      | 0.109 | 0 | 0 | 0 | 0 | 0 | 0.109 | 0 | 0.116 | 0 | 0 | 0 | 0 |
| paip1     | 0.109 | 0 | 0 | 0 | 0 | 0 | 0.109 | 0 | 0.111 | 0 | 0 | 0 | 0 |
| myot      | 0.109 | 0 | 0 | 0 | 0 | 0 | 0.109 | 0 | 0.108 | 0 | 0 | 0 | 0 |
| gbas      | 0.109 | 0 | 0 | 0 | 0 | 0 | 0.109 | 0 | 0.107 | 0 | 0 | 0 | 0 |
| tns4      | 0.108 | 0 | 0 | 0 | 0 | 0 | 0.108 | 0 | 0.109 | 0 | 0 | 0 | 0 |
| ap2a1     | 0.108 | 0 | 0 | 0 | 0 | 0 | 0.108 | 0 | 0.112 | 0 | 0 | 0 | 0 |
| tuba1a    | 0.107 | 0 | 0 | 0 | 0 | 0 | 0.107 | 0 | 0.112 | 0 | 0 | 0 | 0 |
| fabp3p2   | 0.107 | 0 | 0 | 0 | 0 | 0 | 0.107 | 0 | 0.107 | 0 | 0 | 0 | 0 |
| agfg2     | 0.106 | 0 | 0 | 0 | 0 | 0 | 0.106 | 0 | 0.128 | 0 | 0 | 0 | 0 |
| lrfn2     | 0.106 | 0 | 0 | 0 | 0 | 0 | 0.106 | 0 | 0.109 | 0 | 0 | 0 | 0 |
| syne3     | 0.106 | 0 | 0 | 0 | 0 | 0 | 0.106 | 0 | 0.106 | 0 | 0 | 0 | 0 |
| abhd4     | 0.106 | 0 | 0 | 0 | 0 | 0 | 0.106 | 0 | 0.113 | 0 | 0 | 0 | 0 |
| pop7      | 0.106 | 0 | 0 | 0 | 0 | 0 | 0.106 | 0 | 0.11  | 0 | 0 | 0 | 0 |
| stk35     | 0.106 | 0 | 0 | 0 | 0 | 0 | 0.106 | 0 | 0.102 | 0 | 0 | 0 | 0 |
| rab15     | 0.106 | 0 | 0 | 0 | 0 | 0 | 0.106 | 0 | 0.111 | 0 | 0 | 0 | 0 |
| rasgrf1   | 0.106 | 0 | 0 | 0 | 0 | 0 | 0.106 | 0 | 0.112 | 0 | 0 | 0 | 0 |
| uri1      | 0.106 | 0 | 0 | 0 | 0 | 0 | 0.106 | 0 | 0.116 | 0 | 0 | 0 | 0 |
| ap2m1     | 0.107 | 0 | 0 | 0 | 0 | 0 | 0.107 | 0 | 0.11  | 0 | 0 | 0 | 0 |

|           |       |   |   |   |   |   |       |   |       |   |   |   |   |
|-----------|-------|---|---|---|---|---|-------|---|-------|---|---|---|---|
| mecr      | 0.107 | 0 | 0 | 0 | 0 | 0 | 0.107 | 0 | 0.105 | 0 | 0 | 0 | 0 |
| csnk1g2   | 0.107 | 0 | 0 | 0 | 0 | 0 | 0.107 | 0 | 0.106 | 0 | 0 | 0 | 0 |
| pdgfd     | 0.107 | 0 | 0 | 0 | 0 | 0 | 0.107 | 0 | 0.107 | 0 | 0 | 0 | 0 |
| akap6     | 0.107 | 0 | 0 | 0 | 0 | 0 | 0.107 | 0 | 0.112 | 0 | 0 | 0 | 0 |
| grk6p1    | 0.106 | 0 | 0 | 0 | 0 | 0 | 0.106 | 0 | 0.107 | 0 | 0 | 0 | 0 |
| ankrd30bl | 0.107 | 0 | 0 | 0 | 0 | 0 | 0.107 | 0 | 0.109 | 0 | 0 | 0 | 0 |
| ptprj     | 0.109 | 0 | 0 | 0 | 0 | 0 | 0.109 | 0 | 0.111 | 0 | 0 | 0 | 0 |
| lrrc16a   | 0.109 | 0 | 0 | 0 | 0 | 0 | 0.109 | 0 | 0.105 | 0 | 0 | 0 | 0 |
| dnah1     | 0.112 | 0 | 0 | 0 | 0 | 0 | 0.112 | 0 | 0.119 | 0 | 0 | 0 | 0 |
| rell1     | 0.112 | 0 | 0 | 0 | 0 | 0 | 0.112 | 0 | 0.11  | 0 | 0 | 0 | 0 |
| rell2     | 0.112 | 0 | 0 | 0 | 0 | 0 | 0.112 | 0 | 0.11  | 0 | 0 | 0 | 0 |
| myh2      | 0.112 | 0 | 0 | 0 | 0 | 0 | 0.112 | 0 | 0.108 | 0 | 0 | 0 | 0 |
| trdj3     | 0.111 | 0 | 0 | 0 | 0 | 0 | 0.111 | 0 | 0.111 | 0 | 0 | 0 | 0 |
| myom1     | 0.111 | 0 | 0 | 0 | 0 | 0 | 0.111 | 0 | 0.114 | 0 | 0 | 0 | 0 |
| cstf2     | 0.111 | 0 | 0 | 0 | 0 | 0 | 0.111 | 0 | 0.115 | 0 | 0 | 0 | 0 |
| bmp6p1    | 0.111 | 0 | 0 | 0 | 0 | 0 | 0.111 | 0 | 0.105 | 0 | 0 | 0 | 0 |
| tbc1d5    | 0.112 | 0 | 0 | 0 | 0 | 0 | 0.112 | 0 | 0.112 | 0 | 0 | 0 | 0 |
| fscn3     | 0.112 | 0 | 0 | 0 | 0 | 0 | 0.112 | 0 | 0.119 | 0 | 0 | 0 | 0 |
| cstf2t    | 0.113 | 0 | 0 | 0 | 0 | 0 | 0.113 | 0 | 0.114 | 0 | 0 | 0 | 0 |
| pi4k2a    | 0.113 | 0 | 0 | 0 | 0 | 0 | 0.113 | 0 | 0.114 | 0 | 0 | 0 | 0 |
| rgs2      | 0.113 | 0 | 0 | 0 | 0 | 0 | 0.113 | 0 | 0.114 | 0 | 0 | 0 | 0 |
| efnb3     | 0.113 | 0 | 0 | 0 | 0 | 0 | 0.113 | 0 | 0.113 | 0 | 0 | 0 | 0 |
| rab9a     | 0.112 | 0 | 0 | 0 | 0 | 0 | 0.112 | 0 | 0.12  | 0 | 0 | 0 | 0 |
| xirp2     | 0.112 | 0 | 0 | 0 | 0 | 0 | 0.112 | 0 | 0.142 | 0 | 0 | 0 | 0 |
| ighv2-70  | 0.112 | 0 | 0 | 0 | 0 | 0 | 0.112 | 0 | 0.113 | 0 | 0 | 0 | 0 |
| snx4      | 0.111 | 0 | 0 | 0 | 0 | 0 | 0.111 | 0 | 0.113 | 0 | 0 | 0 | 0 |
| ywhab     | 0.11  | 0 | 0 | 0 | 0 | 0 | 0.11  | 0 | 0.112 | 0 | 0 | 0 | 0 |
| plce1     | 0.109 | 0 | 0 | 0 | 0 | 0 | 0.109 | 0 | 0.112 | 0 | 0 | 0 | 0 |
| bai1      | 0.109 | 0 | 0 | 0 | 0 | 0 | 0.109 | 0 | 0.112 | 0 | 0 | 0 | 0 |
| rabep1    | 0.11  | 0 | 0 | 0 | 0 | 0 | 0.11  | 0 | 0.117 | 0 | 0 | 0 | 0 |
| rab22a    | 0.109 | 0 | 0 | 0 | 0 | 0 | 0.109 | 0 | 0.142 | 0 | 0 | 0 | 0 |
| flnb      | 0.109 | 0 | 0 | 0 | 0 | 0 | 0.109 | 0 | 0.107 | 0 | 0 | 0 | 0 |
| diaph2    | 0.109 | 0 | 0 | 0 | 0 | 0 | 0.109 | 0 | 0.112 | 0 | 0 | 0 | 0 |
| myoz1     | 0.109 | 0 | 0 | 0 | 0 | 0 | 0.109 | 0 | 0.105 | 0 | 0 | 0 | 0 |
| kiaa1377  | 0.11  | 0 | 0 | 0 | 0 | 0 | 0.11  | 0 | 0.109 | 0 | 0 | 0 | 0 |
| dram1     | 0.11  | 0 | 0 | 0 | 0 | 0 | 0.11  | 0 | 0.111 | 0 | 0 | 0 | 0 |
| relt      | 0.11  | 0 | 0 | 0 | 0 | 0 | 0.11  | 0 | 0.111 | 0 | 0 | 0 | 0 |
| nkpd1     | 0.11  | 0 | 0 | 0 | 0 | 0 | 0.11  | 0 | 0.109 | 0 | 0 | 0 | 0 |
| ppp1ca    | 0.11  | 0 | 0 | 0 | 0 | 0 | 0.11  | 0 | 0.112 | 0 | 0 | 0 | 0 |
| golp3     | 0.11  | 0 | 0 | 0 | 0 | 0 | 0.11  | 0 | 0.122 | 0 | 0 | 0 | 0 |
| rpsap14   | 0.11  | 0 | 0 | 0 | 0 | 0 | 0.11  | 0 | 0.115 | 0 | 0 | 0 | 0 |

|          |       |   |   |   |   |   |       |   |       |   |   |   |   |
|----------|-------|---|---|---|---|---|-------|---|-------|---|---|---|---|
| stk3     | 0.11  | 0 | 0 | 0 | 0 | 0 | 0.11  | 0 | 0.114 | 0 | 0 | 0 | 0 |
| rgs20    | 0.11  | 0 | 0 | 0 | 0 | 0 | 0.11  | 0 | 0.111 | 0 | 0 | 0 | 0 |
| pfn2     | 0.124 | 0 | 0 | 0 | 0 | 0 | 0.124 | 0 | 0.127 | 0 | 0 | 0 | 0 |
| grk4     | 0.119 | 0 | 0 | 0 | 0 | 0 | 0.119 | 0 | 0.117 | 0 | 0 | 0 | 0 |
| sh3rf2   | 0.501 | 0 | 0 | 0 | 0 | 0 | 0.501 | 0 | 0.496 | 0 | 0 | 0 | 0 |
| inf2     | 0.127 | 0 | 0 | 0 | 0 | 0 | 0.127 | 0 | 0.128 | 0 | 0 | 0 | 0 |
| rasgrp1  | 0.127 | 0 | 0 | 0 | 0 | 0 | 0.127 | 0 | 0.129 | 0 | 0 | 0 | 0 |
| nrbp1    | 0.128 | 0 | 0 | 0 | 0 | 0 | 0.128 | 0 | 0.129 | 0 | 0 | 0 | 0 |
| ankfy1   | 0.128 | 0 | 0 | 0 | 0 | 0 | 0.128 | 0 | 0.129 | 0 | 0 | 0 | 0 |
| rac3     | 0.499 | 0 | 0 | 0 | 0 | 0 | 0.499 | 0 | 0.494 | 0 | 0 | 0 | 0 |
| dlc1     | 0.128 | 0 | 0 | 0 | 0 | 0 | 0.128 | 0 | 0.134 | 0 | 0 | 0 | 0 |
| snx8     | 0.128 | 0 | 0 | 0 | 0 | 0 | 0.128 | 0 | 0.133 | 0 | 0 | 0 | 0 |
| dync1li1 | 0.127 | 0 | 0 | 0 | 0 | 0 | 0.127 | 0 | 0.126 | 0 | 0 | 0 | 0 |
| mlt4     | 0.127 | 0 | 0 | 0 | 0 | 0 | 0.127 | 0 | 0.135 | 0 | 0 | 0 | 0 |
| sema4g   | 0.125 | 0 | 0 | 0 | 0 | 0 | 0.125 | 0 | 0.129 | 0 | 0 | 0 | 0 |
| unkl     | 0.517 | 0 | 0 | 0 | 0 | 0 | 0.517 | 0 | 0.51  | 0 | 0 | 0 | 0 |
| rras     | 0.125 | 0 | 0 | 0 | 0 | 0 | 0.125 | 0 | 0.128 | 0 | 0 | 0 | 0 |
| rufy1    | 0.125 | 0 | 0 | 0 | 0 | 0 | 0.125 | 0 | 0.131 | 0 | 0 | 0 | 0 |
| fpr1     | 0.126 | 0 | 0 | 0 | 0 | 0 | 0.126 | 0 | 0.124 | 0 | 0 | 0 | 0 |
| rab43    | 0.126 | 0 | 0 | 0 | 0 | 0 | 0.126 | 0 | 0.131 | 0 | 0 | 0 | 0 |
| sept1    | 0.126 | 0 | 0 | 0 | 0 | 0 | 0.126 | 0 | 0.127 | 0 | 0 | 0 | 0 |
| stx17    | 0.126 | 0 | 0 | 0 | 0 | 0 | 0.126 | 0 | 0.135 | 0 | 0 | 0 | 0 |
| efs      | 0.128 | 0 | 0 | 0 | 0 | 0 | 0.128 | 0 | 0.131 | 0 | 0 | 0 | 0 |
| baiap2l2 | 0.459 | 0 | 0 | 0 | 0 | 0 | 0.459 | 0 | 0.454 | 0 | 0 | 0 | 0 |
| wdr1     | 0.13  | 0 | 0 | 0 | 0 | 0 | 0.13  | 0 | 0.135 | 0 | 0 | 0 | 0 |
| gnb2     | 0.13  | 0 | 0 | 0 | 0 | 0 | 0.13  | 0 | 0.131 | 0 | 0 | 0 | 0 |
| rab3d    | 0.13  | 0 | 0 | 0 | 0 | 0 | 0.13  | 0 | 0.135 | 0 | 0 | 0 | 0 |
| mcidas   | 0.13  | 0 | 0 | 0 | 0 | 0 | 0.13  | 0 | 0.128 | 0 | 0 | 0 | 0 |
| rab27b   | 0.131 | 0 | 0 | 0 | 0 | 0 | 0.131 | 0 | 0.13  | 0 | 0 | 0 | 0 |
| srgap3   | 0.418 | 0 | 0 | 0 | 0 | 0 | 0.418 | 0 | 0.417 | 0 | 0 | 0 | 0 |
| diaph1   | 0.131 | 0 | 0 | 0 | 0 | 0 | 0.131 | 0 | 0.133 | 0 | 0 | 0 | 0 |
| dock2    | 0.424 | 0 | 0 | 0 | 0 | 0 | 0.424 | 0 | 0.418 | 0 | 0 | 0 | 0 |
| tbc1d2   | 0.442 | 0 | 0 | 0 | 0 | 0 | 0.442 | 0 | 0.44  | 0 | 0 | 0 | 0 |
| ect2     | 0.13  | 0 | 0 | 0 | 0 | 0 | 0.13  | 0 | 0.131 | 0 | 0 | 0 | 0 |
| prkd1    | 0.129 | 0 | 0 | 0 | 0 | 0 | 0.129 | 0 | 0.129 | 0 | 0 | 0 | 0 |
| lclat1   | 0.129 | 0 | 0 | 0 | 0 | 0 | 0.129 | 0 | 0.128 | 0 | 0 | 0 | 0 |
| sh3bp1   | 0.456 | 0 | 0 | 0 | 0 | 0 | 0.456 | 0 | 0.454 | 0 | 0 | 0 | 0 |
| sec14l2  | 0.129 | 0 | 0 | 0 | 0 | 0 | 0.129 | 0 | 0.129 | 0 | 0 | 0 | 0 |
| unc5d    | 0.129 | 0 | 0 | 0 | 0 | 0 | 0.129 | 0 | 0.135 | 0 | 0 | 0 | 0 |
| cyfip1   | 0.452 | 0 | 0 | 0 | 0 | 0 | 0.452 | 0 | 0.446 | 0 | 0 | 0 | 0 |
| mtmr14   | 0.13  | 0 | 0 | 0 | 0 | 0 | 0.13  | 0 | 0.133 | 0 | 0 | 0 | 0 |

|            |       |   |   |       |       |   |       |   |       |       |   |   |   |
|------------|-------|---|---|-------|-------|---|-------|---|-------|-------|---|---|---|
| arl6       | 0.125 | 0 | 0 | 0     | 0     | 0 | 0.125 | 0 | 0.133 | 0     | 0 | 0 | 0 |
| dync1li2   | 0.128 | 0 | 0 | 0     | 0     | 0 | 0.128 | 0 | 0.128 | 0     | 0 | 0 | 0 |
| ralgps1    | 0.125 | 0 | 0 | 0     | 0     | 0 | 0.125 | 0 | 0.126 | 0     | 0 | 0 | 0 |
| arhgdig    | 0.125 | 0 | 0 | 0     | 0     | 0 | 0.125 | 0 | 0.128 | 0     | 0 | 0 | 0 |
| mark2      | 0.125 | 0 | 0 | 0     | 0     | 0 | 0.125 | 0 | 0.13  | 0     | 0 | 0 | 0 |
| rilpl2     | 0.53  | 0 | 0 | 0     | 0     | 0 | 0.53  | 0 | 0.523 | 0     | 0 | 0 | 0 |
| mob2       | 0.124 | 0 | 0 | 0     | 0     | 0 | 0.124 | 0 | 0.128 | 0     | 0 | 0 | 0 |
| rapgef2    | 0.124 | 0 | 0 | 0     | 0     | 0 | 0.124 | 0 | 0.131 | 0     | 0 | 0 | 0 |
| mtss1l     | 0.536 | 0 | 0 | 0     | 0     | 0 | 0.536 | 0 | 0.529 | 0     | 0 | 0 | 0 |
| myl12b     | 0.125 | 0 | 0 | 0     | 0     | 0 | 0.125 | 0 | 0.124 | 0     | 0 | 0 | 0 |
| ephb3      | 0.125 | 0 | 0 | 0     | 0     | 0 | 0.125 | 0 | 0.128 | 0     | 0 | 0 | 0 |
| mut        | 0     | 0 | 0 | 0.113 | 0.113 | 0 | 0     | 0 | 0     | 0.113 | 0 | 0 | 0 |
| nphp3      | 0     | 0 | 0 | 0.113 | 0.113 | 0 | 0     | 0 | 0     | 0.113 | 0 | 0 | 0 |
| wnt9b      | 0     | 0 | 0 | 0.113 | 0.113 | 0 | 0     | 0 | 0     | 0.113 | 0 | 0 | 0 |
| chid1      | 0     | 0 | 0 | 0.121 | 0.121 | 0 | 0     | 0 | 0     | 0.121 | 0 | 0 | 0 |
| mgr4       | 0     | 0 | 0 | 0.119 | 0.119 | 0 | 0     | 0 | 0     | 0.119 | 0 | 0 | 0 |
| ca11       | 0     | 0 | 0 | 0.113 | 0.113 | 0 | 0     | 0 | 0     | 0.113 | 0 | 0 | 0 |
| ptos1      | 0     | 0 | 0 | 0.122 | 0.122 | 0 | 0     | 0 | 0     | 0.122 | 0 | 0 | 0 |
| hpt        | 0     | 0 | 0 | 0.113 | 0.113 | 0 | 0     | 0 | 0     | 0.113 | 0 | 0 | 0 |
| ext2       | 0     | 0 | 0 | 0.113 | 0.113 | 0 | 0     | 0 | 0     | 0.113 | 0 | 0 | 0 |
| efcab4a    | 0     | 0 | 0 | 0.113 | 0.113 | 0 | 0     | 0 | 0     | 0.113 | 0 | 0 | 0 |
| pgls       | 0     | 0 | 0 | 0.113 | 0.113 | 0 | 0     | 0 | 0     | 0.113 | 0 | 0 | 0 |
| dlat       | 0     | 0 | 0 | 0.119 | 0.119 | 0 | 0     | 0 | 0     | 0.119 | 0 | 0 | 0 |
| itpkb      | 0     | 0 | 0 | 0.113 | 0.113 | 0 | 0     | 0 | 0     | 0.113 | 0 | 0 | 0 |
| avpi1      | 0     | 0 | 0 | 0.121 | 0.121 | 0 | 0     | 0 | 0     | 0.121 | 0 | 0 | 0 |
| snord12c   | 0     | 0 | 0 | 0.113 | 0.113 | 0 | 0     | 0 | 0     | 0.113 | 0 | 0 | 0 |
| myo15a     | 0     | 0 | 0 | 0.113 | 0.113 | 0 | 0     | 0 | 0     | 0.113 | 0 | 0 | 0 |
| cys1       | 0     | 0 | 0 | 0.113 | 0.113 | 0 | 0     | 0 | 0     | 0.113 | 0 | 0 | 0 |
| ankrd49    | 0     | 0 | 0 | 0.113 | 0.113 | 0 | 0     | 0 | 0     | 0.113 | 0 | 0 | 0 |
| snora69    | 0     | 0 | 0 | 0.112 | 0.112 | 0 | 0     | 0 | 0     | 0.112 | 0 | 0 | 0 |
| cox7a2p2   | 0     | 0 | 0 | 0.121 | 0.121 | 0 | 0     | 0 | 0     | 0.121 | 0 | 0 | 0 |
| kcna1      | 0     | 0 | 0 | 0.112 | 0.112 | 0 | 0     | 0 | 0     | 0.112 | 0 | 0 | 0 |
| kcnip2     | 0     | 0 | 0 | 0.112 | 0.112 | 0 | 0     | 0 | 0     | 0.112 | 0 | 0 | 0 |
| pate4      | 0     | 0 | 0 | 0.12  | 0.12  | 0 | 0     | 0 | 0     | 0.12  | 0 | 0 | 0 |
| pth2r      | 0     | 0 | 0 | 0.121 | 0.121 | 0 | 0     | 0 | 0     | 0.121 | 0 | 0 | 0 |
| igkv1or2-3 | 0     | 0 | 0 | 0.112 | 0.112 | 0 | 0     | 0 | 0     | 0.112 | 0 | 0 | 0 |
| tff3       | 0     | 0 | 0 | 0.112 | 0.112 | 0 | 0     | 0 | 0     | 0.112 | 0 | 0 | 0 |
| cox7a2     | 0     | 0 | 0 | 0.112 | 0.112 | 0 | 0     | 0 | 0     | 0.112 | 0 | 0 | 0 |
| ighj6      | 0     | 0 | 0 | 0.121 | 0.121 | 0 | 0     | 0 | 0     | 0.121 | 0 | 0 | 0 |
| s100a3     | 0     | 0 | 0 | 0.116 | 0.116 | 0 | 0     | 0 | 0     | 0.116 | 0 | 0 | 0 |
| aif1l      | 0     | 0 | 0 | 0.113 | 0.113 | 0 | 0     | 0 | 0     | 0.113 | 0 | 0 | 0 |

|            |   |   |   |       |       |   |   |   |   |       |   |   |   |
|------------|---|---|---|-------|-------|---|---|---|---|-------|---|---|---|
| akr1b1p2   | 0 | 0 | 0 | 0.112 | 0.112 | 0 | 0 | 0 | 0 | 0.112 | 0 | 0 | 0 |
| foir2      | 0 | 0 | 0 | 0.12  | 0.12  | 0 | 0 | 0 | 0 | 0.12  | 0 | 0 | 0 |
| tfb1m      | 0 | 0 | 0 | 0.12  | 0.12  | 0 | 0 | 0 | 0 | 0.12  | 0 | 0 | 0 |
| pygl       | 0 | 0 | 0 | 0.112 | 0.112 | 0 | 0 | 0 | 0 | 0.112 | 0 | 0 | 0 |
| gusbp1     | 0 | 0 | 0 | 0.113 | 0.113 | 0 | 0 | 0 | 0 | 0.113 | 0 | 0 | 0 |
| kcnj5      | 0 | 0 | 0 | 0.119 | 0.119 | 0 | 0 | 0 | 0 | 0.119 | 0 | 0 | 0 |
| pkd1       | 0 | 0 | 0 | 0.113 | 0.113 | 0 | 0 | 0 | 0 | 0.113 | 0 | 0 | 0 |
| usp17l27   | 0 | 0 | 0 | 0.113 | 0.113 | 0 | 0 | 0 | 0 | 0.113 | 0 | 0 | 0 |
| prm1       | 0 | 0 | 0 | 0.119 | 0.119 | 0 | 0 | 0 | 0 | 0.119 | 0 | 0 | 0 |
| rbmy2tp    | 0 | 0 | 0 | 0.119 | 0.119 | 0 | 0 | 0 | 0 | 0.119 | 0 | 0 | 0 |
| elk1       | 0 | 0 | 0 | 0.122 | 0.122 | 0 | 0 | 0 | 0 | 0.122 | 0 | 0 | 0 |
| linc00035  | 0 | 0 | 0 | 0.113 | 0.113 | 0 | 0 | 0 | 0 | 0.113 | 0 | 0 | 0 |
| pdhb       | 0 | 0 | 0 | 0.113 | 0.113 | 0 | 0 | 0 | 0 | 0.113 | 0 | 0 | 0 |
| slc5a2     | 0 | 0 | 0 | 0.119 | 0.119 | 0 | 0 | 0 | 0 | 0.119 | 0 | 0 | 0 |
| defb106b   | 0 | 0 | 0 | 0.113 | 0.113 | 0 | 0 | 0 | 0 | 0.113 | 0 | 0 | 0 |
| pds5a      | 0 | 0 | 0 | 0.114 | 0.114 | 0 | 0 | 0 | 0 | 0.114 | 0 | 0 | 0 |
| amy1c      | 0 | 0 | 0 | 0.114 | 0.114 | 0 | 0 | 0 | 0 | 0.114 | 0 | 0 | 0 |
| ggt1       | 0 | 0 | 0 | 0.114 | 0.114 | 0 | 0 | 0 | 0 | 0.114 | 0 | 0 | 0 |
| fam120b    | 0 | 0 | 0 | 0.114 | 0.114 | 0 | 0 | 0 | 0 | 0.114 | 0 | 0 | 0 |
| kcng4      | 0 | 0 | 0 | 0.119 | 0.119 | 0 | 0 | 0 | 0 | 0.119 | 0 | 0 | 0 |
| pgk1       | 0 | 0 | 0 | 0.117 | 0.117 | 0 | 0 | 0 | 0 | 0.117 | 0 | 0 | 0 |
| azin1      | 0 | 0 | 0 | 0.113 | 0.113 | 0 | 0 | 0 | 0 | 0.113 | 0 | 0 | 0 |
| trim74     | 0 | 0 | 0 | 0.113 | 0.113 | 0 | 0 | 0 | 0 | 0.113 | 0 | 0 | 0 |
| trim73     | 0 | 0 | 0 | 0.113 | 0.113 | 0 | 0 | 0 | 0 | 0.113 | 0 | 0 | 0 |
| glat       | 0 | 0 | 0 | 0.113 | 0.113 | 0 | 0 | 0 | 0 | 0.113 | 0 | 0 | 0 |
| amyp1      | 0 | 0 | 0 | 0.113 | 0.113 | 0 | 0 | 0 | 0 | 0.113 | 0 | 0 | 0 |
| orai2      | 0 | 0 | 0 | 0.122 | 0.122 | 0 | 0 | 0 | 0 | 0.122 | 0 | 0 | 0 |
| chst6      | 0 | 0 | 0 | 0.113 | 0.113 | 0 | 0 | 0 | 0 | 0.113 | 0 | 0 | 0 |
| myp11      | 0 | 0 | 0 | 0.119 | 0.119 | 0 | 0 | 0 | 0 | 0.119 | 0 | 0 | 0 |
| emx2os     | 0 | 0 | 0 | 0.117 | 0.117 | 0 | 0 | 0 | 0 | 0.117 | 0 | 0 | 0 |
| best4      | 0 | 0 | 0 | 0.117 | 0.117 | 0 | 0 | 0 | 0 | 0.117 | 0 | 0 | 0 |
| slc32a1    | 0 | 0 | 0 | 0.113 | 0.113 | 0 | 0 | 0 | 0 | 0.113 | 0 | 0 | 0 |
| pkhd1      | 0 | 0 | 0 | 0.113 | 0.113 | 0 | 0 | 0 | 0 | 0.113 | 0 | 0 | 0 |
| amy1a      | 0 | 0 | 0 | 0.119 | 0.119 | 0 | 0 | 0 | 0 | 0.119 | 0 | 0 | 0 |
| pdxk       | 0 | 0 | 0 | 0.122 | 0.122 | 0 | 0 | 0 | 0 | 0.122 | 0 | 0 | 0 |
| gtsf1l     | 0 | 0 | 0 | 0.119 | 0.119 | 0 | 0 | 0 | 0 | 0.119 | 0 | 0 | 0 |
| rn7sk      | 0 | 0 | 0 | 0.121 | 0.121 | 0 | 0 | 0 | 0 | 0.121 | 0 | 0 | 0 |
| bcyrn1     | 0 | 0 | 0 | 0.113 | 0.113 | 0 | 0 | 0 | 0 | 0.113 | 0 | 0 | 0 |
| golim4     | 0 | 0 | 0 | 0.121 | 0.121 | 0 | 0 | 0 | 0 | 0.121 | 0 | 0 | 0 |
| sfpq       | 0 | 0 | 0 | 0.117 | 0.117 | 0 | 0 | 0 | 0 | 0.117 | 0 | 0 | 0 |
| igkv2or2-1 | 0 | 0 | 0 | 0.112 | 0.112 | 0 | 0 | 0 | 0 | 0.112 | 0 | 0 | 0 |

|            |   |   |   |       |       |   |   |   |   |       |   |   |   |
|------------|---|---|---|-------|-------|---|---|---|---|-------|---|---|---|
| igkv1or2-6 | 0 | 0 | 0 | 0.112 | 0.112 | 0 | 0 | 0 | 0 | 0.112 | 0 | 0 | 0 |
| acot11     | 0 | 0 | 0 | 0.12  | 0.12  | 0 | 0 | 0 | 0 | 0.12  | 0 | 0 | 0 |
| kcna3      | 0 | 0 | 0 | 0.12  | 0.12  | 0 | 0 | 0 | 0 | 0.12  | 0 | 0 | 0 |
| slitrk6    | 0 | 0 | 0 | 0.111 | 0.111 | 0 | 0 | 0 | 0 | 0.111 | 0 | 0 | 0 |
| rfk        | 0 | 0 | 0 | 0.111 | 0.111 | 0 | 0 | 0 | 0 | 0.111 | 0 | 0 | 0 |
| akr1b1     | 0 | 0 | 0 | 0.111 | 0.111 | 0 | 0 | 0 | 0 | 0.111 | 0 | 0 | 0 |
| fsd11      | 0 | 0 | 0 | 0.111 | 0.111 | 0 | 0 | 0 | 0 | 0.111 | 0 | 0 | 0 |
| zp4        | 0 | 0 | 0 | 0.111 | 0.111 | 0 | 0 | 0 | 0 | 0.111 | 0 | 0 | 0 |
| gprc6a     | 0 | 0 | 0 | 0.12  | 0.12  | 0 | 0 | 0 | 0 | 0.12  | 0 | 0 | 0 |
| pou2f2     | 0 | 0 | 0 | 0.112 | 0.112 | 0 | 0 | 0 | 0 | 0.112 | 0 | 0 | 0 |
| glrx       | 0 | 0 | 0 | 0.112 | 0.112 | 0 | 0 | 0 | 0 | 0.112 | 0 | 0 | 0 |
| efcab4b    | 0 | 0 | 0 | 0.112 | 0.112 | 0 | 0 | 0 | 0 | 0.112 | 0 | 0 | 0 |
| slc4a11    | 0 | 0 | 0 | 0.12  | 0.12  | 0 | 0 | 0 | 0 | 0.12  | 0 | 0 | 0 |
| trnt1      | 0 | 0 | 0 | 0.112 | 0.112 | 0 | 0 | 0 | 0 | 0.112 | 0 | 0 | 0 |
| nrbp2      | 0 | 0 | 0 | 0.12  | 0.12  | 0 | 0 | 0 | 0 | 0.12  | 0 | 0 | 0 |
| bp6        | 0 | 0 | 0 | 0.12  | 0.12  | 0 | 0 | 0 | 0 | 0.12  | 0 | 0 | 0 |
| tuba3d     | 0 | 0 | 0 | 0.112 | 0.112 | 0 | 0 | 0 | 0 | 0.112 | 0 | 0 | 0 |
| alg14      | 0 | 0 | 0 | 0.111 | 0.111 | 0 | 0 | 0 | 0 | 0.111 | 0 | 0 | 0 |
| pdk3       | 0 | 0 | 0 | 0.111 | 0.111 | 0 | 0 | 0 | 0 | 0.111 | 0 | 0 | 0 |
| caps2      | 0 | 0 | 0 | 0.111 | 0.111 | 0 | 0 | 0 | 0 | 0.111 | 0 | 0 | 0 |
| defb104b   | 0 | 0 | 0 | 0.111 | 0.111 | 0 | 0 | 0 | 0 | 0.111 | 0 | 0 | 0 |
| sec24d     | 0 | 0 | 0 | 0.116 | 0.116 | 0 | 0 | 0 | 0 | 0.116 | 0 | 0 | 0 |
| znf181     | 0 | 0 | 0 | 0.12  | 0.12  | 0 | 0 | 0 | 0 | 0.12  | 0 | 0 | 0 |
| gpr20      | 0 | 0 | 0 | 0.12  | 0.12  | 0 | 0 | 0 | 0 | 0.12  | 0 | 0 | 0 |
| h1fx       | 0 | 0 | 0 | 0.111 | 0.111 | 0 | 0 | 0 | 0 | 0.111 | 0 | 0 | 0 |
| slc25a1    | 0 | 0 | 0 | 0.111 | 0.111 | 0 | 0 | 0 | 0 | 0.111 | 0 | 0 | 0 |
| trim41     | 0 | 0 | 0 | 0.12  | 0.12  | 0 | 0 | 0 | 0 | 0.12  | 0 | 0 | 0 |
| cna1       | 0 | 0 | 0 | 0.12  | 0.12  | 0 | 0 | 0 | 0 | 0.12  | 0 | 0 | 0 |
| lyz        | 0 | 0 | 0 | 0.116 | 0.116 | 0 | 0 | 0 | 0 | 0.116 | 0 | 0 | 0 |
| pthlh      | 0 | 0 | 0 | 0.111 | 0.111 | 0 | 0 | 0 | 0 | 0.111 | 0 | 0 | 0 |
| yars2      | 0 | 0 | 0 | 0.111 | 0.111 | 0 | 0 | 0 | 0 | 0.111 | 0 | 0 | 0 |
| ush1c      | 0 | 0 | 0 | 0.12  | 0.12  | 0 | 0 | 0 | 0 | 0.12  | 0 | 0 | 0 |
| ptcsc1     | 0 | 0 | 0 | 0.111 | 0.111 | 0 | 0 | 0 | 0 | 0.111 | 0 | 0 | 0 |
| amy2b      | 0 | 0 | 0 | 0.122 | 0.122 | 0 | 0 | 0 | 0 | 0.122 | 0 | 0 | 0 |
| pde4c      | 0 | 0 | 0 | 0.12  | 0.12  | 0 | 0 | 0 | 0 | 0.12  | 0 | 0 | 0 |
| lenep      | 0 | 0 | 0 | 0.112 | 0.112 | 0 | 0 | 0 | 0 | 0.112 | 0 | 0 | 0 |
| glrx2      | 0 | 0 | 0 | 0.112 | 0.112 | 0 | 0 | 0 | 0 | 0.112 | 0 | 0 | 0 |
| mab2111    | 0 | 0 | 0 | 0.112 | 0.112 | 0 | 0 | 0 | 0 | 0.112 | 0 | 0 | 0 |
| gss        | 0 | 0 | 0 | 0.112 | 0.112 | 0 | 0 | 0 | 0 | 0.112 | 0 | 0 | 0 |
| pdzk1ip1   | 0 | 0 | 0 | 0.12  | 0.12  | 0 | 0 | 0 | 0 | 0.12  | 0 | 0 | 0 |
| scamp2     | 0 | 0 | 0 | 0.12  | 0.12  | 0 | 0 | 0 | 0 | 0.12  | 0 | 0 | 0 |

|           |   |   |   |       |       |   |   |   |   |       |   |   |   |
|-----------|---|---|---|-------|-------|---|---|---|---|-------|---|---|---|
| srp14     | 0 | 0 | 0 | 0.12  | 0.12  | 0 | 0 | 0 | 0 | 0.12  | 0 | 0 | 0 |
| slc16a4   | 0 | 0 | 0 | 0.117 | 0.117 | 0 | 0 | 0 | 0 | 0.117 | 0 | 0 | 0 |
| pdhx      | 0 | 0 | 0 | 0.112 | 0.112 | 0 | 0 | 0 | 0 | 0.112 | 0 | 0 | 0 |
| cherp     | 0 | 0 | 0 | 0.12  | 0.12  | 0 | 0 | 0 | 0 | 0.12  | 0 | 0 | 0 |
| csn1s2bp  | 0 | 0 | 0 | 0.112 | 0.112 | 0 | 0 | 0 | 0 | 0.112 | 0 | 0 | 0 |
| ptmap1    | 0 | 0 | 0 | 0.112 | 0.112 | 0 | 0 | 0 | 0 | 0.112 | 0 | 0 | 0 |
| ptmap5    | 0 | 0 | 0 | 0.112 | 0.112 | 0 | 0 | 0 | 0 | 0.112 | 0 | 0 | 0 |
| calb2     | 0 | 0 | 0 | 0.112 | 0.112 | 0 | 0 | 0 | 0 | 0.112 | 0 | 0 | 0 |
| nt5e      | 0 | 0 | 0 | 0.112 | 0.112 | 0 | 0 | 0 | 0 | 0.112 | 0 | 0 | 0 |
| dmrt3     | 0 | 0 | 0 | 0.12  | 0.12  | 0 | 0 | 0 | 0 | 0.12  | 0 | 0 | 0 |
| atp7b     | 0 | 0 | 0 | 0.112 | 0.112 | 0 | 0 | 0 | 0 | 0.112 | 0 | 0 | 0 |
| ndst1     | 0 | 0 | 0 | 0.112 | 0.112 | 0 | 0 | 0 | 0 | 0.112 | 0 | 0 | 0 |
| zhx3      | 0 | 0 | 0 | 0.112 | 0.112 | 0 | 0 | 0 | 0 | 0.112 | 0 | 0 | 0 |
| bicc1     | 0 | 0 | 0 | 0.117 | 0.117 | 0 | 0 | 0 | 0 | 0.117 | 0 | 0 | 0 |
| lsm4      | 0 | 0 | 0 | 0.12  | 0.12  | 0 | 0 | 0 | 0 | 0.12  | 0 | 0 | 0 |
| anxa11    | 0 | 0 | 0 | 0.112 | 0.112 | 0 | 0 | 0 | 0 | 0.112 | 0 | 0 | 0 |
| adh5p2    | 0 | 0 | 0 | 0.112 | 0.112 | 0 | 0 | 0 | 0 | 0.112 | 0 | 0 | 0 |
| epg5      | 0 | 0 | 0 | 0.12  | 0.12  | 0 | 0 | 0 | 0 | 0.12  | 0 | 0 | 0 |
| slc46a1   | 0 | 0 | 0 | 0.12  | 0.12  | 0 | 0 | 0 | 0 | 0.12  | 0 | 0 | 0 |
| psg5      | 0 | 0 | 0 | 0.112 | 0.112 | 0 | 0 | 0 | 0 | 0.112 | 0 | 0 | 0 |
| gucy2ep   | 0 | 0 | 0 | 0.121 | 0.121 | 0 | 0 | 0 | 0 | 0.121 | 0 | 0 | 0 |
| adh5p4    | 0 | 0 | 0 | 0.112 | 0.112 | 0 | 0 | 0 | 0 | 0.112 | 0 | 0 | 0 |
| tor3a     | 0 | 0 | 0 | 0.112 | 0.112 | 0 | 0 | 0 | 0 | 0.112 | 0 | 0 | 0 |
| aco1      | 0 | 0 | 0 | 0.112 | 0.112 | 0 | 0 | 0 | 0 | 0.112 | 0 | 0 | 0 |
| or7e66p   | 0 | 0 | 0 | 0.122 | 0.122 | 0 | 0 | 0 | 0 | 0.122 | 0 | 0 | 0 |
| or7e22p   | 0 | 0 | 0 | 0.122 | 0.122 | 0 | 0 | 0 | 0 | 0.122 | 0 | 0 | 0 |
| myo3b     | 0 | 0 | 0 | 0.112 | 0.112 | 0 | 0 | 0 | 0 | 0.112 | 0 | 0 | 0 |
| thoc5     | 0 | 0 | 0 | 0.112 | 0.112 | 0 | 0 | 0 | 0 | 0.112 | 0 | 0 | 0 |
| slc2a13   | 0 | 0 | 0 | 0.112 | 0.112 | 0 | 0 | 0 | 0 | 0.112 | 0 | 0 | 0 |
| chiap2    | 0 | 0 | 0 | 0.12  | 0.12  | 0 | 0 | 0 | 0 | 0.12  | 0 | 0 | 0 |
| etf1      | 0 | 0 | 0 | 0.121 | 0.121 | 0 | 0 | 0 | 0 | 0.121 | 0 | 0 | 0 |
| b3gnt5    | 0 | 0 | 0 | 0.114 | 0.114 | 0 | 0 | 0 | 0 | 0.114 | 0 | 0 | 0 |
| ppp1r2p1  | 0 | 0 | 0 | 0.117 | 0.117 | 0 | 0 | 0 | 0 | 0.117 | 0 | 0 | 0 |
| acot12    | 0 | 0 | 0 | 0.118 | 0.118 | 0 | 0 | 0 | 0 | 0.118 | 0 | 0 | 0 |
| heatr1    | 0 | 0 | 0 | 0.116 | 0.116 | 0 | 0 | 0 | 0 | 0.116 | 0 | 0 | 0 |
| oaz1      | 0 | 0 | 0 | 0.118 | 0.118 | 0 | 0 | 0 | 0 | 0.118 | 0 | 0 | 0 |
| loc642355 | 0 | 0 | 0 | 0.118 | 0.118 | 0 | 0 | 0 | 0 | 0.118 | 0 | 0 | 0 |
| cadps     | 0 | 0 | 0 | 0.118 | 0.118 | 0 | 0 | 0 | 0 | 0.118 | 0 | 0 | 0 |
| myp18     | 0 | 0 | 0 | 0.116 | 0.116 | 0 | 0 | 0 | 0 | 0.116 | 0 | 0 | 0 |
| hiat1     | 0 | 0 | 0 | 0.12  | 0.12  | 0 | 0 | 0 | 0 | 0.12  | 0 | 0 | 0 |
| kcna2     | 0 | 0 | 0 | 0.118 | 0.118 | 0 | 0 | 0 | 0 | 0.118 | 0 | 0 | 0 |

|            |   |   |   |       |       |   |   |   |   |       |   |   |   |
|------------|---|---|---|-------|-------|---|---|---|---|-------|---|---|---|
| trnan3     | 0 | 0 | 0 | 0.116 | 0.116 | 0 | 0 | 0 | 0 | 0.116 | 0 | 0 | 0 |
| trnan2     | 0 | 0 | 0 | 0.116 | 0.116 | 0 | 0 | 0 | 0 | 0.116 | 0 | 0 | 0 |
| stim2      | 0 | 0 | 0 | 0.118 | 0.118 | 0 | 0 | 0 | 0 | 0.118 | 0 | 0 | 0 |
| pabpc1p4   | 0 | 0 | 0 | 0.116 | 0.116 | 0 | 0 | 0 | 0 | 0.116 | 0 | 0 | 0 |
| rnu2-3p    | 0 | 0 | 0 | 0.116 | 0.116 | 0 | 0 | 0 | 0 | 0.116 | 0 | 0 | 0 |
| sczd1      | 0 | 0 | 0 | 0.116 | 0.116 | 0 | 0 | 0 | 0 | 0.116 | 0 | 0 | 0 |
| aimp1      | 0 | 0 | 0 | 0.117 | 0.117 | 0 | 0 | 0 | 0 | 0.117 | 0 | 0 | 0 |
| pafah1b1p2 | 0 | 0 | 0 | 0.115 | 0.115 | 0 | 0 | 0 | 0 | 0.115 | 0 | 0 | 0 |
| epb41      | 0 | 0 | 0 | 0.121 | 0.121 | 0 | 0 | 0 | 0 | 0.121 | 0 | 0 | 0 |
| tpmtp1     | 0 | 0 | 0 | 0.122 | 0.122 | 0 | 0 | 0 | 0 | 0.122 | 0 | 0 | 0 |
| kcnb1      | 0 | 0 | 0 | 0.118 | 0.118 | 0 | 0 | 0 | 0 | 0.118 | 0 | 0 | 0 |
| slc2a5     | 0 | 0 | 0 | 0.115 | 0.115 | 0 | 0 | 0 | 0 | 0.115 | 0 | 0 | 0 |
| tdo2       | 0 | 0 | 0 | 0.115 | 0.115 | 0 | 0 | 0 | 0 | 0.115 | 0 | 0 | 0 |
| tmc2       | 0 | 0 | 0 | 0.121 | 0.121 | 0 | 0 | 0 | 0 | 0.121 | 0 | 0 | 0 |
| snrpc      | 0 | 0 | 0 | 0.115 | 0.115 | 0 | 0 | 0 | 0 | 0.115 | 0 | 0 | 0 |
| sln        | 0 | 0 | 0 | 0.116 | 0.116 | 0 | 0 | 0 | 0 | 0.116 | 0 | 0 | 0 |
| ogdh       | 0 | 0 | 0 | 0.121 | 0.121 | 0 | 0 | 0 | 0 | 0.121 | 0 | 0 | 0 |
| tec        | 0 | 0 | 0 | 0.115 | 0.115 | 0 | 0 | 0 | 0 | 0.115 | 0 | 0 | 0 |
| cerk       | 0 | 0 | 0 | 0.118 | 0.118 | 0 | 0 | 0 | 0 | 0.118 | 0 | 0 | 0 |
| phtf2      | 0 | 0 | 0 | 0.121 | 0.121 | 0 | 0 | 0 | 0 | 0.121 | 0 | 0 | 0 |
| pafah1b1p1 | 0 | 0 | 0 | 0.115 | 0.115 | 0 | 0 | 0 | 0 | 0.115 | 0 | 0 | 0 |
| si         | 0 | 0 | 0 | 0.115 | 0.115 | 0 | 0 | 0 | 0 | 0.115 | 0 | 0 | 0 |
| nipal1     | 0 | 0 | 0 | 0.116 | 0.116 | 0 | 0 | 0 | 0 | 0.116 | 0 | 0 | 0 |
| kcnj9      | 0 | 0 | 0 | 0.115 | 0.115 | 0 | 0 | 0 | 0 | 0.115 | 0 | 0 | 0 |
| gpr98      | 0 | 0 | 0 | 0.121 | 0.121 | 0 | 0 | 0 | 0 | 0.121 | 0 | 0 | 0 |
| pga5       | 0 | 0 | 0 | 0.116 | 0.116 | 0 | 0 | 0 | 0 | 0.116 | 0 | 0 | 0 |
| ampd3      | 0 | 0 | 0 | 0.117 | 0.117 | 0 | 0 | 0 | 0 | 0.117 | 0 | 0 | 0 |
| c2orf61    | 0 | 0 | 0 | 0.117 | 0.117 | 0 | 0 | 0 | 0 | 0.117 | 0 | 0 | 0 |
| pi4k2b     | 0 | 0 | 0 | 0.122 | 0.122 | 0 | 0 | 0 | 0 | 0.122 | 0 | 0 | 0 |
| rps26      | 0 | 0 | 0 | 0.116 | 0.116 | 0 | 0 | 0 | 0 | 0.116 | 0 | 0 | 0 |
| kcnd1      | 0 | 0 | 0 | 0.116 | 0.116 | 0 | 0 | 0 | 0 | 0.116 | 0 | 0 | 0 |
| me3        | 0 | 0 | 0 | 0.116 | 0.116 | 0 | 0 | 0 | 0 | 0.116 | 0 | 0 | 0 |
| awat1      | 0 | 0 | 0 | 0.116 | 0.116 | 0 | 0 | 0 | 0 | 0.116 | 0 | 0 | 0 |
| prpsap2    | 0 | 0 | 0 | 0.117 | 0.117 | 0 | 0 | 0 | 0 | 0.117 | 0 | 0 | 0 |
| pde5a      | 0 | 0 | 0 | 0.117 | 0.117 | 0 | 0 | 0 | 0 | 0.117 | 0 | 0 | 0 |
| gng11      | 0 | 0 | 0 | 0.116 | 0.116 | 0 | 0 | 0 | 0 | 0.116 | 0 | 0 | 0 |
| sca30      | 0 | 0 | 0 | 0.116 | 0.116 | 0 | 0 | 0 | 0 | 0.116 | 0 | 0 | 0 |
| b4galt5    | 0 | 0 | 0 | 0.122 | 0.122 | 0 | 0 | 0 | 0 | 0.122 | 0 | 0 | 0 |
| dyt17      | 0 | 0 | 0 | 0.122 | 0.122 | 0 | 0 | 0 | 0 | 0.122 | 0 | 0 | 0 |
| uox        | 0 | 0 | 0 | 0.117 | 0.117 | 0 | 0 | 0 | 0 | 0.117 | 0 | 0 | 0 |
| apol5      | 0 | 0 | 0 | 0.116 | 0.116 | 0 | 0 | 0 | 0 | 0.116 | 0 | 0 | 0 |

|           |   |   |   |       |       |   |   |   |   |       |   |   |   |
|-----------|---|---|---|-------|-------|---|---|---|---|-------|---|---|---|
| aadac     | 0 | 0 | 0 | 0.116 | 0.116 | 0 | 0 | 0 | 0 | 0.116 | 0 | 0 | 0 |
| vta1      | 0 | 0 | 0 | 0.116 | 0.116 | 0 | 0 | 0 | 0 | 0.116 | 0 | 0 | 0 |
| bckdk     | 0 | 0 | 0 | 0.122 | 0.122 | 0 | 0 | 0 | 0 | 0.122 | 0 | 0 | 0 |
| dgat2l6   | 0 | 0 | 0 | 0.116 | 0.116 | 0 | 0 | 0 | 0 | 0.116 | 0 | 0 | 0 |
| alpl      | 0 | 0 | 0 | 0.116 | 0.116 | 0 | 0 | 0 | 0 | 0.116 | 0 | 0 | 0 |
| pdia2     | 0 | 0 | 0 | 0.118 | 0.118 | 0 | 0 | 0 | 0 | 0.118 | 0 | 0 | 0 |
| anxa1     | 0 | 0 | 0 | 0.118 | 0.118 | 0 | 0 | 0 | 0 | 0.118 | 0 | 0 | 0 |
| pou6f2    | 0 | 0 | 0 | 0.116 | 0.116 | 0 | 0 | 0 | 0 | 0.116 | 0 | 0 | 0 |
| tim13     | 0 | 0 | 0 | 0.116 | 0.116 | 0 | 0 | 0 | 0 | 0.116 | 0 | 0 | 0 |
| dnajc11   | 0 | 0 | 0 | 0.121 | 0.121 | 0 | 0 | 0 | 0 | 0.121 | 0 | 0 | 0 |
| EIF5A1    | 0 | 0 | 0 | 0.116 | 0.116 | 0 | 0 | 0 | 0 | 0.116 | 0 | 0 | 0 |
| kcnk16    | 0 | 0 | 0 | 0.118 | 0.118 | 0 | 0 | 0 | 0 | 0.118 | 0 | 0 | 0 |
| hrtr1     | 0 | 0 | 0 | 0.116 | 0.116 | 0 | 0 | 0 | 0 | 0.116 | 0 | 0 | 0 |
| ndufc1    | 0 | 0 | 0 | 0.116 | 0.116 | 0 | 0 | 0 | 0 | 0.116 | 0 | 0 | 0 |
| znf18     | 0 | 0 | 0 | 0.118 | 0.118 | 0 | 0 | 0 | 0 | 0.118 | 0 | 0 | 0 |
| guca2b    | 0 | 0 | 0 | 0.121 | 0.121 | 0 | 0 | 0 | 0 | 0.121 | 0 | 0 | 0 |
| ndufb5    | 0 | 0 | 0 | 0.116 | 0.116 | 0 | 0 | 0 | 0 | 0.116 | 0 | 0 | 0 |
| gje1      | 0 | 0 | 0 | 0.121 | 0.121 | 0 | 0 | 0 | 0 | 0.121 | 0 | 0 | 0 |
| ndufb1    | 0 | 0 | 0 | 0.116 | 0.116 | 0 | 0 | 0 | 0 | 0.116 | 0 | 0 | 0 |
| EIF2B4    | 0 | 0 | 0 | 0.121 | 0.121 | 0 | 0 | 0 | 0 | 0.121 | 0 | 0 | 0 |
| ptrh1     | 0 | 0 | 0 | 0.115 | 0.115 | 0 | 0 | 0 | 0 | 0.115 | 0 | 0 | 0 |
| LOC440895 | 0 | 0 | 0 | 0.118 | 0.118 | 0 | 0 | 0 | 0 | 0.118 | 0 | 0 | 0 |
| kcnk3     | 0 | 0 | 0 | 0.117 | 0.117 | 0 | 0 | 0 | 0 | 0.117 | 0 | 0 | 0 |
| samd9l    | 0 | 0 | 0 | 0.122 | 0.122 | 0 | 0 | 0 | 0 | 0.122 | 0 | 0 | 0 |
| trnaI2    | 0 | 0 | 0 | 0.117 | 0.117 | 0 | 0 | 0 | 0 | 0.117 | 0 | 0 | 0 |
| acot8     | 0 | 0 | 0 | 0.119 | 0.119 | 0 | 0 | 0 | 0 | 0.119 | 0 | 0 | 0 |
| chchd4    | 0 | 0 | 0 | 0.114 | 0.114 | 0 | 0 | 0 | 0 | 0.114 | 0 | 0 | 0 |
| gabrr2    | 0 | 0 | 0 | 0.114 | 0.114 | 0 | 0 | 0 | 0 | 0.114 | 0 | 0 | 0 |
| hmgcs1    | 0 | 0 | 0 | 0.119 | 0.119 | 0 | 0 | 0 | 0 | 0.119 | 0 | 0 | 0 |
| PPP2CA    | 0 | 0 | 0 | 0.119 | 0.119 | 0 | 0 | 0 | 0 | 0.119 | 0 | 0 | 0 |
| trappc1   | 0 | 0 | 0 | 0.122 | 0.122 | 0 | 0 | 0 | 0 | 0.122 | 0 | 0 | 0 |
| pitpna    | 0 | 0 | 0 | 0.114 | 0.114 | 0 | 0 | 0 | 0 | 0.114 | 0 | 0 | 0 |
| slc18b1   | 0 | 0 | 0 | 0.114 | 0.114 | 0 | 0 | 0 | 0 | 0.114 | 0 | 0 | 0 |
| cca1      | 0 | 0 | 0 | 0.114 | 0.114 | 0 | 0 | 0 | 0 | 0.114 | 0 | 0 | 0 |
| acy1      | 0 | 0 | 0 | 0.114 | 0.114 | 0 | 0 | 0 | 0 | 0.114 | 0 | 0 | 0 |
| krt3      | 0 | 0 | 0 | 0.119 | 0.119 | 0 | 0 | 0 | 0 | 0.119 | 0 | 0 | 0 |
| slco4a1   | 0 | 0 | 0 | 0.114 | 0.114 | 0 | 0 | 0 | 0 | 0.114 | 0 | 0 | 0 |
| dapl1     | 0 | 0 | 0 | 0.119 | 0.119 | 0 | 0 | 0 | 0 | 0.119 | 0 | 0 | 0 |
| phospho1  | 0 | 0 | 0 | 0.122 | 0.122 | 0 | 0 | 0 | 0 | 0.122 | 0 | 0 | 0 |
| slc11a2   | 0 | 0 | 0 | 0.114 | 0.114 | 0 | 0 | 0 | 0 | 0.114 | 0 | 0 | 0 |
| seh1l     | 0 | 0 | 0 | 0.117 | 0.117 | 0 | 0 | 0 | 0 | 0.117 | 0 | 0 | 0 |

|          |   |   |   |       |       |   |   |   |   |       |   |   |   |
|----------|---|---|---|-------|-------|---|---|---|---|-------|---|---|---|
| slc19a2  | 0 | 0 | 0 | 0.119 | 0.119 | 0 | 0 | 0 | 0 | 0.119 | 0 | 0 | 0 |
| anxa2    | 0 | 0 | 0 | 0.117 | 0.117 | 0 | 0 | 0 | 0 | 0.117 | 0 | 0 | 0 |
| nags     | 0 | 0 | 0 | 0.117 | 0.117 | 0 | 0 | 0 | 0 | 0.117 | 0 | 0 | 0 |
| ogt      | 0 | 0 | 0 | 0.119 | 0.119 | 0 | 0 | 0 | 0 | 0.119 | 0 | 0 | 0 |
| kcnk15   | 0 | 0 | 0 | 0.119 | 0.119 | 0 | 0 | 0 | 0 | 0.119 | 0 | 0 | 0 |
| mbs2     | 0 | 0 | 0 | 0.114 | 0.114 | 0 | 0 | 0 | 0 | 0.114 | 0 | 0 | 0 |
| gmpr2    | 0 | 0 | 0 | 0.114 | 0.114 | 0 | 0 | 0 | 0 | 0.114 | 0 | 0 | 0 |
| otud1    | 0 | 0 | 0 | 0.114 | 0.114 | 0 | 0 | 0 | 0 | 0.114 | 0 | 0 | 0 |
| anapc13  | 0 | 0 | 0 | 0.114 | 0.114 | 0 | 0 | 0 | 0 | 0.114 | 0 | 0 | 0 |
| hsd3b7   | 0 | 0 | 0 | 0.119 | 0.119 | 0 | 0 | 0 | 0 | 0.119 | 0 | 0 | 0 |
| ppp1r14a | 0 | 0 | 0 | 0.114 | 0.114 | 0 | 0 | 0 | 0 | 0.114 | 0 | 0 | 0 |
| kcms2    | 0 | 0 | 0 | 0.117 | 0.117 | 0 | 0 | 0 | 0 | 0.117 | 0 | 0 | 0 |
| btf3p11  | 0 | 0 | 0 | 0.117 | 0.117 | 0 | 0 | 0 | 0 | 0.117 | 0 | 0 | 0 |
| slc4a3   | 0 | 0 | 0 | 0.114 | 0.114 | 0 | 0 | 0 | 0 | 0.114 | 0 | 0 | 0 |
| aoc4p    | 0 | 0 | 0 | 0.114 | 0.114 | 0 | 0 | 0 | 0 | 0.114 | 0 | 0 | 0 |
| uqcrb    | 0 | 0 | 0 | 0.121 | 0.121 | 0 | 0 | 0 | 0 | 0.121 | 0 | 0 | 0 |
| ccdc37   | 0 | 0 | 0 | 0.114 | 0.114 | 0 | 0 | 0 | 0 | 0.114 | 0 | 0 | 0 |
| cdh23    | 0 | 0 | 0 | 0.118 | 0.118 | 0 | 0 | 0 | 0 | 0.118 | 0 | 0 | 0 |
| foxi1    | 0 | 0 | 0 | 0.118 | 0.118 | 0 | 0 | 0 | 0 | 0.118 | 0 | 0 | 0 |
| nt5c     | 0 | 0 | 0 | 0.118 | 0.118 | 0 | 0 | 0 | 0 | 0.118 | 0 | 0 | 0 |
| slc36a3  | 0 | 0 | 0 | 0.115 | 0.115 | 0 | 0 | 0 | 0 | 0.115 | 0 | 0 | 0 |
| c1orf85  | 0 | 0 | 0 | 0.115 | 0.115 | 0 | 0 | 0 | 0 | 0.115 | 0 | 0 | 0 |
| retsat   | 0 | 0 | 0 | 0.115 | 0.115 | 0 | 0 | 0 | 0 | 0.115 | 0 | 0 | 0 |
| nme8     | 0 | 0 | 0 | 0.115 | 0.115 | 0 | 0 | 0 | 0 | 0.115 | 0 | 0 | 0 |
| dbt      | 0 | 0 | 0 | 0.115 | 0.115 | 0 | 0 | 0 | 0 | 0.115 | 0 | 0 | 0 |
| btg2     | 0 | 0 | 0 | 0.121 | 0.121 | 0 | 0 | 0 | 0 | 0.121 | 0 | 0 | 0 |
| rab8b    | 0 | 0 | 0 | 0.122 | 0.122 | 0 | 0 | 0 | 0 | 0.122 | 0 | 0 | 0 |
| igjp1    | 0 | 0 | 0 | 0.115 | 0.115 | 0 | 0 | 0 | 0 | 0.115 | 0 | 0 | 0 |
| coq2     | 0 | 0 | 0 | 0.121 | 0.121 | 0 | 0 | 0 | 0 | 0.121 | 0 | 0 | 0 |
| hivep1   | 0 | 0 | 0 | 0.116 | 0.116 | 0 | 0 | 0 | 0 | 0.116 | 0 | 0 | 0 |
| slc22a14 | 0 | 0 | 0 | 0.115 | 0.115 | 0 | 0 | 0 | 0 | 0.115 | 0 | 0 | 0 |
| wdr13    | 0 | 0 | 0 | 0.115 | 0.115 | 0 | 0 | 0 | 0 | 0.115 | 0 | 0 | 0 |
| best3    | 0 | 0 | 0 | 0.115 | 0.115 | 0 | 0 | 0 | 0 | 0.115 | 0 | 0 | 0 |
| cst4     | 0 | 0 | 0 | 0.115 | 0.115 | 0 | 0 | 0 | 0 | 0.115 | 0 | 0 | 0 |
| myo15b   | 0 | 0 | 0 | 0.118 | 0.118 | 0 | 0 | 0 | 0 | 0.118 | 0 | 0 | 0 |
| cbln4    | 0 | 0 | 0 | 0.116 | 0.116 | 0 | 0 | 0 | 0 | 0.116 | 0 | 0 | 0 |
| mogat1   | 0 | 0 | 0 | 0.119 | 0.119 | 0 | 0 | 0 | 0 | 0.119 | 0 | 0 | 0 |
| ppp3ca   | 0 | 0 | 0 | 0.115 | 0.115 | 0 | 0 | 0 | 0 | 0.115 | 0 | 0 | 0 |
| cabp4    | 0 | 0 | 0 | 0.119 | 0.119 | 0 | 0 | 0 | 0 | 0.119 | 0 | 0 | 0 |
| cnga2    | 0 | 0 | 0 | 0.114 | 0.114 | 0 | 0 | 0 | 0 | 0.114 | 0 | 0 | 0 |
| scgn     | 0 | 0 | 0 | 0.114 | 0.114 | 0 | 0 | 0 | 0 | 0.114 | 0 | 0 | 0 |

|          |   |   |   |       |       |   |   |   |   |       |   |   |   |
|----------|---|---|---|-------|-------|---|---|---|---|-------|---|---|---|
| atp7a    | 0 | 0 | 0 | 0.114 | 0.114 | 0 | 0 | 0 | 0 | 0.114 | 0 | 0 | 0 |
| pim1     | 0 | 0 | 0 | 0.121 | 0.121 | 0 | 0 | 0 | 0 | 0.121 | 0 | 0 | 0 |
| fam69c   | 0 | 0 | 0 | 0.115 | 0.115 | 0 | 0 | 0 | 0 | 0.115 | 0 | 0 | 0 |
| colgalt2 | 0 | 0 | 0 | 0.115 | 0.115 | 0 | 0 | 0 | 0 | 0.115 | 0 | 0 | 0 |
| mcoln2   | 0 | 0 | 0 | 0.122 | 0.122 | 0 | 0 | 0 | 0 | 0.122 | 0 | 0 | 0 |
| etfa     | 0 | 0 | 0 | 0.121 | 0.121 | 0 | 0 | 0 | 0 | 0.121 | 0 | 0 | 0 |
| pdlim2   | 0 | 0 | 0 | 0.115 | 0.115 | 0 | 0 | 0 | 0 | 0.115 | 0 | 0 | 0 |
| slc6a16  | 0 | 0 | 0 | 0.115 | 0.115 | 0 | 0 | 0 | 0 | 0.115 | 0 | 0 | 0 |
| gnpat    | 0 | 0 | 0 | 0.115 | 0.115 | 0 | 0 | 0 | 0 | 0.115 | 0 | 0 | 0 |
| pou4f2   | 0 | 0 | 0 | 0.116 | 0.116 | 0 | 0 | 0 | 0 | 0.116 | 0 | 0 | 0 |
| tcp10l   | 0 | 0 | 0 | 0.122 | 0.122 | 0 | 0 | 0 | 0 | 0.122 | 0 | 0 | 0 |
| kcnt1    | 0 | 0 | 0 | 0.107 | 0.107 | 0 | 0 | 0 | 0 | 0.107 | 0 | 0 | 0 |
| ttc4p1   | 0 | 0 | 0 | 0.103 | 0.103 | 0 | 0 | 0 | 0 | 0.103 | 0 | 0 | 0 |
| aox2p    | 0 | 0 | 0 | 0.103 | 0.103 | 0 | 0 | 0 | 0 | 0.103 | 0 | 0 | 0 |
| dyx3     | 0 | 0 | 0 | 0.103 | 0.103 | 0 | 0 | 0 | 0 | 0.103 | 0 | 0 | 0 |
| cant1    | 0 | 0 | 0 | 0.103 | 0.103 | 0 | 0 | 0 | 0 | 0.103 | 0 | 0 | 0 |
| sbdsp1   | 0 | 0 | 0 | 0.103 | 0.103 | 0 | 0 | 0 | 0 | 0.103 | 0 | 0 | 0 |
| mlycd    | 0 | 0 | 0 | 0.103 | 0.103 | 0 | 0 | 0 | 0 | 0.103 | 0 | 0 | 0 |
| s100a6   | 0 | 0 | 0 | 0.103 | 0.103 | 0 | 0 | 0 | 0 | 0.103 | 0 | 0 | 0 |
| tpi1p2   | 0 | 0 | 0 | 0.103 | 0.103 | 0 | 0 | 0 | 0 | 0.103 | 0 | 0 | 0 |
| tpi1p1   | 0 | 0 | 0 | 0.103 | 0.103 | 0 | 0 | 0 | 0 | 0.103 | 0 | 0 | 0 |
| nphs2    | 0 | 0 | 0 | 0.103 | 0.103 | 0 | 0 | 0 | 0 | 0.103 | 0 | 0 | 0 |
| galk2    | 0 | 0 | 0 | 0.103 | 0.103 | 0 | 0 | 0 | 0 | 0.103 | 0 | 0 | 0 |
| rnu6-50p | 0 | 0 | 0 | 0.103 | 0.103 | 0 | 0 | 0 | 0 | 0.103 | 0 | 0 | 0 |
| pdk2     | 0 | 0 | 0 | 0.104 | 0.104 | 0 | 0 | 0 | 0 | 0.104 | 0 | 0 | 0 |
| znf72p   | 0 | 0 | 0 | 0.104 | 0.104 | 0 | 0 | 0 | 0 | 0.104 | 0 | 0 | 0 |
| znf70    | 0 | 0 | 0 | 0.104 | 0.104 | 0 | 0 | 0 | 0 | 0.104 | 0 | 0 | 0 |
| znf69    | 0 | 0 | 0 | 0.104 | 0.104 | 0 | 0 | 0 | 0 | 0.104 | 0 | 0 | 0 |
| gtppb10  | 0 | 0 | 0 | 0.104 | 0.104 | 0 | 0 | 0 | 0 | 0.104 | 0 | 0 | 0 |
| bloc1s3  | 0 | 0 | 0 | 0.103 | 0.103 | 0 | 0 | 0 | 0 | 0.103 | 0 | 0 | 0 |
| slc25a13 | 0 | 0 | 0 | 0.103 | 0.103 | 0 | 0 | 0 | 0 | 0.103 | 0 | 0 | 0 |
| lco      | 0 | 0 | 0 | 0.103 | 0.103 | 0 | 0 | 0 | 0 | 0.103 | 0 | 0 | 0 |
| alppl2   | 0 | 0 | 0 | 0.103 | 0.103 | 0 | 0 | 0 | 0 | 0.103 | 0 | 0 | 0 |
| sh2d4a   | 0 | 0 | 0 | 0.103 | 0.103 | 0 | 0 | 0 | 0 | 0.103 | 0 | 0 | 0 |
| rrr5     | 0 | 0 | 0 | 0.103 | 0.103 | 0 | 0 | 0 | 0 | 0.103 | 0 | 0 | 0 |
| rrr3     | 0 | 0 | 0 | 0.103 | 0.103 | 0 | 0 | 0 | 0 | 0.103 | 0 | 0 | 0 |
| cbs      | 0 | 0 | 0 | 0.103 | 0.103 | 0 | 0 | 0 | 0 | 0.103 | 0 | 0 | 0 |
| hrasls   | 0 | 0 | 0 | 0.103 | 0.103 | 0 | 0 | 0 | 0 | 0.103 | 0 | 0 | 0 |
| abcd1    | 0 | 0 | 0 | 0.103 | 0.103 | 0 | 0 | 0 | 0 | 0.103 | 0 | 0 | 0 |
| atp5c1   | 0 | 0 | 0 | 0.103 | 0.103 | 0 | 0 | 0 | 0 | 0.103 | 0 | 0 | 0 |
| prdx2    | 0 | 0 | 0 | 0.102 | 0.102 | 0 | 0 | 0 | 0 | 0.102 | 0 | 0 | 0 |

|          |   |   |   |       |       |   |   |   |   |       |   |   |   |
|----------|---|---|---|-------|-------|---|---|---|---|-------|---|---|---|
| gpr75    | 0 | 0 | 0 | 0.102 | 0.102 | 0 | 0 | 0 | 0 | 0.102 | 0 | 0 | 0 |
| hmbs     | 0 | 0 | 0 | 0.102 | 0.102 | 0 | 0 | 0 | 0 | 0.102 | 0 | 0 | 0 |
| EIF1     | 0 | 0 | 0 | 0.102 | 0.102 | 0 | 0 | 0 | 0 | 0.102 | 0 | 0 | 0 |
| papss1   | 0 | 0 | 0 | 0.102 | 0.102 | 0 | 0 | 0 | 0 | 0.102 | 0 | 0 | 0 |
| rp34     | 0 | 0 | 0 | 0.102 | 0.102 | 0 | 0 | 0 | 0 | 0.102 | 0 | 0 | 0 |
| tpst1    | 0 | 0 | 0 | 0.103 | 0.103 | 0 | 0 | 0 | 0 | 0.103 | 0 | 0 | 0 |
| tff1     | 0 | 0 | 0 | 0.103 | 0.103 | 0 | 0 | 0 | 0 | 0.103 | 0 | 0 | 0 |
| slc7a11  | 0 | 0 | 0 | 0.103 | 0.103 | 0 | 0 | 0 | 0 | 0.103 | 0 | 0 | 0 |
| fhasd    | 0 | 0 | 0 | 0.103 | 0.103 | 0 | 0 | 0 | 0 | 0.103 | 0 | 0 | 0 |
| tuft1    | 0 | 0 | 0 | 0.103 | 0.103 | 0 | 0 | 0 | 0 | 0.103 | 0 | 0 | 0 |
| rnr4     | 0 | 0 | 0 | 0.103 | 0.103 | 0 | 0 | 0 | 0 | 0.103 | 0 | 0 | 0 |
| prss57   | 0 | 0 | 0 | 0.103 | 0.103 | 0 | 0 | 0 | 0 | 0.103 | 0 | 0 | 0 |
| znf135   | 0 | 0 | 0 | 0.103 | 0.103 | 0 | 0 | 0 | 0 | 0.103 | 0 | 0 | 0 |
| slc17a5  | 0 | 0 | 0 | 0.103 | 0.103 | 0 | 0 | 0 | 0 | 0.103 | 0 | 0 | 0 |
| hs3st1   | 0 | 0 | 0 | 0.103 | 0.103 | 0 | 0 | 0 | 0 | 0.103 | 0 | 0 | 0 |
| ctsa     | 0 | 0 | 0 | 0.103 | 0.103 | 0 | 0 | 0 | 0 | 0.103 | 0 | 0 | 0 |
| znf77    | 0 | 0 | 0 | 0.103 | 0.103 | 0 | 0 | 0 | 0 | 0.103 | 0 | 0 | 0 |
| eef2     | 0 | 0 | 0 | 0.104 | 0.104 | 0 | 0 | 0 | 0 | 0.104 | 0 | 0 | 0 |
| myp13    | 0 | 0 | 0 | 0.104 | 0.104 | 0 | 0 | 0 | 0 | 0.104 | 0 | 0 | 0 |
| kiaa1199 | 0 | 0 | 0 | 0.104 | 0.104 | 0 | 0 | 0 | 0 | 0.104 | 0 | 0 | 0 |
| mtg2     | 0 | 0 | 0 | 0.104 | 0.104 | 0 | 0 | 0 | 0 | 0.104 | 0 | 0 | 0 |
| wbscr27  | 0 | 0 | 0 | 0.104 | 0.104 | 0 | 0 | 0 | 0 | 0.104 | 0 | 0 | 0 |
| mir455   | 0 | 0 | 0 | 0.104 | 0.104 | 0 | 0 | 0 | 0 | 0.104 | 0 | 0 | 0 |
| rcan2    | 0 | 0 | 0 | 0.104 | 0.104 | 0 | 0 | 0 | 0 | 0.104 | 0 | 0 | 0 |
| ptdss1   | 0 | 0 | 0 | 0.104 | 0.104 | 0 | 0 | 0 | 0 | 0.104 | 0 | 0 | 0 |
| zp1      | 0 | 0 | 0 | 0.104 | 0.104 | 0 | 0 | 0 | 0 | 0.104 | 0 | 0 | 0 |
| ppr1     | 0 | 0 | 0 | 0.104 | 0.104 | 0 | 0 | 0 | 0 | 0.104 | 0 | 0 | 0 |
| psd2     | 0 | 0 | 0 | 0.104 | 0.104 | 0 | 0 | 0 | 0 | 0.104 | 0 | 0 | 0 |
| dmrtb1   | 0 | 0 | 0 | 0.104 | 0.104 | 0 | 0 | 0 | 0 | 0.104 | 0 | 0 | 0 |
| pfkfb1   | 0 | 0 | 0 | 0.104 | 0.104 | 0 | 0 | 0 | 0 | 0.104 | 0 | 0 | 0 |
| atp6v0c  | 0 | 0 | 0 | 0.104 | 0.104 | 0 | 0 | 0 | 0 | 0.104 | 0 | 0 | 0 |
| cuzd1    | 0 | 0 | 0 | 0.105 | 0.105 | 0 | 0 | 0 | 0 | 0.105 | 0 | 0 | 0 |
| fau      | 0 | 0 | 0 | 0.105 | 0.105 | 0 | 0 | 0 | 0 | 0.105 | 0 | 0 | 0 |
| pdha1    | 0 | 0 | 0 | 0.105 | 0.105 | 0 | 0 | 0 | 0 | 0.105 | 0 | 0 | 0 |
| lrrc6    | 0 | 0 | 0 | 0.105 | 0.105 | 0 | 0 | 0 | 0 | 0.105 | 0 | 0 | 0 |
| slc27a5  | 0 | 0 | 0 | 0.105 | 0.105 | 0 | 0 | 0 | 0 | 0.105 | 0 | 0 | 0 |
| extl1    | 0 | 0 | 0 | 0.105 | 0.105 | 0 | 0 | 0 | 0 | 0.105 | 0 | 0 | 0 |
| snora62  | 0 | 0 | 0 | 0.104 | 0.104 | 0 | 0 | 0 | 0 | 0.104 | 0 | 0 | 0 |
| feom3    | 0 | 0 | 0 | 0.105 | 0.105 | 0 | 0 | 0 | 0 | 0.105 | 0 | 0 | 0 |
| fra13a   | 0 | 0 | 0 | 0.105 | 0.105 | 0 | 0 | 0 | 0 | 0.105 | 0 | 0 | 0 |
| npl      | 0 | 0 | 0 | 0.105 | 0.105 | 0 | 0 | 0 | 0 | 0.105 | 0 | 0 | 0 |

|           |   |   |   |       |       |   |   |   |   |       |   |   |   |
|-----------|---|---|---|-------|-------|---|---|---|---|-------|---|---|---|
| rpl9      | 0 | 0 | 0 | 0.104 | 0.104 | 0 | 0 | 0 | 0 | 0.104 | 0 | 0 | 0 |
| itpripl1  | 0 | 0 | 0 | 0.104 | 0.104 | 0 | 0 | 0 | 0 | 0.104 | 0 | 0 | 0 |
| cth       | 0 | 0 | 0 | 0.104 | 0.104 | 0 | 0 | 0 | 0 | 0.104 | 0 | 0 | 0 |
| dfna49    | 0 | 0 | 0 | 0.104 | 0.104 | 0 | 0 | 0 | 0 | 0.104 | 0 | 0 | 0 |
| glrx5     | 0 | 0 | 0 | 0.104 | 0.104 | 0 | 0 | 0 | 0 | 0.104 | 0 | 0 | 0 |
| kera      | 0 | 0 | 0 | 0.104 | 0.104 | 0 | 0 | 0 | 0 | 0.104 | 0 | 0 | 0 |
| cbn1      | 0 | 0 | 0 | 0.104 | 0.104 | 0 | 0 | 0 | 0 | 0.104 | 0 | 0 | 0 |
| bean1     | 0 | 0 | 0 | 0.104 | 0.104 | 0 | 0 | 0 | 0 | 0.104 | 0 | 0 | 0 |
| sema6b    | 0 | 0 | 0 | 0.104 | 0.104 | 0 | 0 | 0 | 0 | 0.104 | 0 | 0 | 0 |
| prpf8     | 0 | 0 | 0 | 0.104 | 0.104 | 0 | 0 | 0 | 0 | 0.104 | 0 | 0 | 0 |
| sca19     | 0 | 0 | 0 | 0.104 | 0.104 | 0 | 0 | 0 | 0 | 0.104 | 0 | 0 | 0 |
| stath     | 0 | 0 | 0 | 0.104 | 0.104 | 0 | 0 | 0 | 0 | 0.104 | 0 | 0 | 0 |
| EIF1B     | 0 | 0 | 0 | 0.104 | 0.104 | 0 | 0 | 0 | 0 | 0.104 | 0 | 0 | 0 |
| dhrs2     | 0 | 0 | 0 | 0.104 | 0.104 | 0 | 0 | 0 | 0 | 0.104 | 0 | 0 | 0 |
| kif19     | 0 | 0 | 0 | 0.104 | 0.104 | 0 | 0 | 0 | 0 | 0.104 | 0 | 0 | 0 |
| pxmp2     | 0 | 0 | 0 | 0.104 | 0.104 | 0 | 0 | 0 | 0 | 0.104 | 0 | 0 | 0 |
| gcm2      | 0 | 0 | 0 | 0.104 | 0.104 | 0 | 0 | 0 | 0 | 0.104 | 0 | 0 | 0 |
| kctd3     | 0 | 0 | 0 | 0.104 | 0.104 | 0 | 0 | 0 | 0 | 0.104 | 0 | 0 | 0 |
| fam208b   | 0 | 0 | 0 | 0.104 | 0.104 | 0 | 0 | 0 | 0 | 0.104 | 0 | 0 | 0 |
| dmbt1     | 0 | 0 | 0 | 0.104 | 0.104 | 0 | 0 | 0 | 0 | 0.104 | 0 | 0 | 0 |
| ppil1     | 0 | 0 | 0 | 0.104 | 0.104 | 0 | 0 | 0 | 0 | 0.104 | 0 | 0 | 0 |
| or6p1     | 0 | 0 | 0 | 0.104 | 0.104 | 0 | 0 | 0 | 0 | 0.104 | 0 | 0 | 0 |
| or52a4    | 0 | 0 | 0 | 0.104 | 0.104 | 0 | 0 | 0 | 0 | 0.104 | 0 | 0 | 0 |
| or1c1     | 0 | 0 | 0 | 0.104 | 0.104 | 0 | 0 | 0 | 0 | 0.104 | 0 | 0 | 0 |
| slc7a10   | 0 | 0 | 0 | 0.102 | 0.102 | 0 | 0 | 0 | 0 | 0.102 | 0 | 0 | 0 |
| fbp1      | 0 | 0 | 0 | 0.102 | 0.102 | 0 | 0 | 0 | 0 | 0.102 | 0 | 0 | 0 |
| esd       | 0 | 0 | 0 | 0.101 | 0.101 | 0 | 0 | 0 | 0 | 0.101 | 0 | 0 | 0 |
| cyb5r3    | 0 | 0 | 0 | 0.101 | 0.101 | 0 | 0 | 0 | 0 | 0.101 | 0 | 0 | 0 |
| ndufa8    | 0 | 0 | 0 | 0.101 | 0.101 | 0 | 0 | 0 | 0 | 0.101 | 0 | 0 | 0 |
| sar1a     | 0 | 0 | 0 | 0.101 | 0.101 | 0 | 0 | 0 | 0 | 0.101 | 0 | 0 | 0 |
| hist1h2ba | 0 | 0 | 0 | 0.101 | 0.101 | 0 | 0 | 0 | 0 | 0.101 | 0 | 0 | 0 |
| rnf112    | 0 | 0 | 0 | 0.101 | 0.101 | 0 | 0 | 0 | 0 | 0.101 | 0 | 0 | 0 |
| fyxd6     | 0 | 0 | 0 | 0.101 | 0.101 | 0 | 0 | 0 | 0 | 0.101 | 0 | 0 | 0 |
| capns2    | 0 | 0 | 0 | 0.101 | 0.101 | 0 | 0 | 0 | 0 | 0.101 | 0 | 0 | 0 |
| tut1      | 0 | 0 | 0 | 0.101 | 0.101 | 0 | 0 | 0 | 0 | 0.101 | 0 | 0 | 0 |
| tmem114   | 0 | 0 | 0 | 0.101 | 0.101 | 0 | 0 | 0 | 0 | 0.101 | 0 | 0 | 0 |
| clic4     | 0 | 0 | 0 | 0.101 | 0.101 | 0 | 0 | 0 | 0 | 0.101 | 0 | 0 | 0 |
| dsg2      | 0 | 0 | 0 | 0.101 | 0.101 | 0 | 0 | 0 | 0 | 0.101 | 0 | 0 | 0 |
| anxa5     | 0 | 0 | 0 | 0.101 | 0.101 | 0 | 0 | 0 | 0 | 0.101 | 0 | 0 | 0 |
| dpy19l2   | 0 | 0 | 0 | 0.101 | 0.101 | 0 | 0 | 0 | 0 | 0.101 | 0 | 0 | 0 |
| lrp2      | 0 | 0 | 0 | 0.101 | 0.101 | 0 | 0 | 0 | 0 | 0.101 | 0 | 0 | 0 |

|           |   |   |   |       |       |   |   |   |   |       |   |   |   |
|-----------|---|---|---|-------|-------|---|---|---|---|-------|---|---|---|
| pla2g4c   | 0 | 0 | 0 | 0.101 | 0.101 | 0 | 0 | 0 | 0 | 0.101 | 0 | 0 | 0 |
| bpifa2    | 0 | 0 | 0 | 0.101 | 0.101 | 0 | 0 | 0 | 0 | 0.101 | 0 | 0 | 0 |
| tys       | 0 | 0 | 0 | 0.101 | 0.101 | 0 | 0 | 0 | 0 | 0.101 | 0 | 0 | 0 |
| dfna27    | 0 | 0 | 0 | 0.101 | 0.101 | 0 | 0 | 0 | 0 | 0.101 | 0 | 0 | 0 |
| psma1     | 0 | 0 | 0 | 0.101 | 0.101 | 0 | 0 | 0 | 0 | 0.101 | 0 | 0 | 0 |
| kcnk17    | 0 | 0 | 0 | 0.101 | 0.101 | 0 | 0 | 0 | 0 | 0.101 | 0 | 0 | 0 |
| pde3a     | 0 | 0 | 0 | 0.101 | 0.101 | 0 | 0 | 0 | 0 | 0.101 | 0 | 0 | 0 |
| emilin2   | 0 | 0 | 0 | 0.101 | 0.101 | 0 | 0 | 0 | 0 | 0.101 | 0 | 0 | 0 |
| lamp1     | 0 | 0 | 0 | 0.101 | 0.101 | 0 | 0 | 0 | 0 | 0.101 | 0 | 0 | 0 |
| gpr139    | 0 | 0 | 0 | 0.1   | 0.1   | 0 | 0 | 0 | 0 | 0.1   | 0 | 0 | 0 |
| mrpl43    | 0 | 0 | 0 | 0.1   | 0.1   | 0 | 0 | 0 | 0 | 0.1   | 0 | 0 | 0 |
| szt2      | 0 | 0 | 0 | 0.1   | 0.1   | 0 | 0 | 0 | 0 | 0.1   | 0 | 0 | 0 |
| kcnrg     | 0 | 0 | 0 | 0.1   | 0.1   | 0 | 0 | 0 | 0 | 0.1   | 0 | 0 | 0 |
| b4galt1   | 0 | 0 | 0 | 0.1   | 0.1   | 0 | 0 | 0 | 0 | 0.1   | 0 | 0 | 0 |
| trnw      | 0 | 0 | 0 | 0.1   | 0.1   | 0 | 0 | 0 | 0 | 0.1   | 0 | 0 | 0 |
| ppp2cbp1  | 0 | 0 | 0 | 0.122 | 0.122 | 0 | 0 | 0 | 0 | 0.122 | 0 | 0 | 0 |
| peg3-as1  | 0 | 0 | 0 | 0.1   | 0.1   | 0 | 0 | 0 | 0 | 0.1   | 0 | 0 | 0 |
| hist1h3h  | 0 | 0 | 0 | 0.1   | 0.1   | 0 | 0 | 0 | 0 | 0.1   | 0 | 0 | 0 |
| slc26a5   | 0 | 0 | 0 | 0.1   | 0.1   | 0 | 0 | 0 | 0 | 0.1   | 0 | 0 | 0 |
| hrc       | 0 | 0 | 0 | 0.1   | 0.1   | 0 | 0 | 0 | 0 | 0.1   | 0 | 0 | 0 |
| nit1      | 0 | 0 | 0 | 0.1   | 0.1   | 0 | 0 | 0 | 0 | 0.1   | 0 | 0 | 0 |
| ppef1     | 0 | 0 | 0 | 0.101 | 0.101 | 0 | 0 | 0 | 0 | 0.101 | 0 | 0 | 0 |
| acadm     | 0 | 0 | 0 | 0.101 | 0.101 | 0 | 0 | 0 | 0 | 0.101 | 0 | 0 | 0 |
| zfyve1    | 0 | 0 | 0 | 0.101 | 0.101 | 0 | 0 | 0 | 0 | 0.101 | 0 | 0 | 0 |
| mccc2     | 0 | 0 | 0 | 0.101 | 0.101 | 0 | 0 | 0 | 0 | 0.101 | 0 | 0 | 0 |
| nudt4     | 0 | 0 | 0 | 0.1   | 0.1   | 0 | 0 | 0 | 0 | 0.1   | 0 | 0 | 0 |
| atat1     | 0 | 0 | 0 | 0.1   | 0.1   | 0 | 0 | 0 | 0 | 0.1   | 0 | 0 | 0 |
| scp2      | 0 | 0 | 0 | 0.1   | 0.1   | 0 | 0 | 0 | 0 | 0.1   | 0 | 0 | 0 |
| candn1    | 0 | 0 | 0 | 0.1   | 0.1   | 0 | 0 | 0 | 0 | 0.1   | 0 | 0 | 0 |
| six6      | 0 | 0 | 0 | 0.1   | 0.1   | 0 | 0 | 0 | 0 | 0.1   | 0 | 0 | 0 |
| kcnk1     | 0 | 0 | 0 | 0.1   | 0.1   | 0 | 0 | 0 | 0 | 0.1   | 0 | 0 | 0 |
| cetn4p    | 0 | 0 | 0 | 0.101 | 0.101 | 0 | 0 | 0 | 0 | 0.101 | 0 | 0 | 0 |
| sparc     | 0 | 0 | 0 | 0.101 | 0.101 | 0 | 0 | 0 | 0 | 0.101 | 0 | 0 | 0 |
| znf358    | 0 | 0 | 0 | 0.102 | 0.102 | 0 | 0 | 0 | 0 | 0.102 | 0 | 0 | 0 |
| stsp1     | 0 | 0 | 0 | 0.102 | 0.102 | 0 | 0 | 0 | 0 | 0.102 | 0 | 0 | 0 |
| usmg5     | 0 | 0 | 0 | 0.102 | 0.102 | 0 | 0 | 0 | 0 | 0.102 | 0 | 0 | 0 |
| fxn       | 0 | 0 | 0 | 0.102 | 0.102 | 0 | 0 | 0 | 0 | 0.102 | 0 | 0 | 0 |
| glt8d1    | 0 | 0 | 0 | 0.102 | 0.102 | 0 | 0 | 0 | 0 | 0.102 | 0 | 0 | 0 |
| dars2     | 0 | 0 | 0 | 0.102 | 0.102 | 0 | 0 | 0 | 0 | 0.102 | 0 | 0 | 0 |
| hist2h2bb | 0 | 0 | 0 | 0.102 | 0.102 | 0 | 0 | 0 | 0 | 0.102 | 0 | 0 | 0 |
| myo16     | 0 | 0 | 0 | 0.102 | 0.102 | 0 | 0 | 0 | 0 | 0.102 | 0 | 0 | 0 |

|           |   |   |   |       |       |   |   |   |   |       |   |   |   |
|-----------|---|---|---|-------|-------|---|---|---|---|-------|---|---|---|
| smoc1     | 0 | 0 | 0 | 0.102 | 0.102 | 0 | 0 | 0 | 0 | 0.102 | 0 | 0 | 0 |
| chka      | 0 | 0 | 0 | 0.102 | 0.102 | 0 | 0 | 0 | 0 | 0.102 | 0 | 0 | 0 |
| tm6sf1    | 0 | 0 | 0 | 0.102 | 0.102 | 0 | 0 | 0 | 0 | 0.102 | 0 | 0 | 0 |
| tm6sf2    | 0 | 0 | 0 | 0.102 | 0.102 | 0 | 0 | 0 | 0 | 0.102 | 0 | 0 | 0 |
| rln3      | 0 | 0 | 0 | 0.102 | 0.102 | 0 | 0 | 0 | 0 | 0.102 | 0 | 0 | 0 |
| timm17b   | 0 | 0 | 0 | 0.102 | 0.102 | 0 | 0 | 0 | 0 | 0.102 | 0 | 0 | 0 |
| tenc1     | 0 | 0 | 0 | 0.102 | 0.102 | 0 | 0 | 0 | 0 | 0.102 | 0 | 0 | 0 |
| acot2     | 0 | 0 | 0 | 0.102 | 0.102 | 0 | 0 | 0 | 0 | 0.102 | 0 | 0 | 0 |
| acat1     | 0 | 0 | 0 | 0.102 | 0.102 | 0 | 0 | 0 | 0 | 0.102 | 0 | 0 | 0 |
| prkxp1    | 0 | 0 | 0 | 0.102 | 0.102 | 0 | 0 | 0 | 0 | 0.102 | 0 | 0 | 0 |
| scar3     | 0 | 0 | 0 | 0.102 | 0.102 | 0 | 0 | 0 | 0 | 0.102 | 0 | 0 | 0 |
| psg7      | 0 | 0 | 0 | 0.102 | 0.102 | 0 | 0 | 0 | 0 | 0.102 | 0 | 0 | 0 |
| timm10    | 0 | 0 | 0 | 0.102 | 0.102 | 0 | 0 | 0 | 0 | 0.102 | 0 | 0 | 0 |
| bspry     | 0 | 0 | 0 | 0.102 | 0.102 | 0 | 0 | 0 | 0 | 0.102 | 0 | 0 | 0 |
| herc2p6   | 0 | 0 | 0 | 0.102 | 0.102 | 0 | 0 | 0 | 0 | 0.102 | 0 | 0 | 0 |
| akr1c2    | 0 | 0 | 0 | 0.101 | 0.101 | 0 | 0 | 0 | 0 | 0.101 | 0 | 0 | 0 |
| nudt14    | 0 | 0 | 0 | 0.101 | 0.101 | 0 | 0 | 0 | 0 | 0.101 | 0 | 0 | 0 |
| psg4      | 0 | 0 | 0 | 0.101 | 0.101 | 0 | 0 | 0 | 0 | 0.101 | 0 | 0 | 0 |
| klhl32    | 0 | 0 | 0 | 0.101 | 0.101 | 0 | 0 | 0 | 0 | 0.101 | 0 | 0 | 0 |
| kiaa1549l | 0 | 0 | 0 | 0.101 | 0.101 | 0 | 0 | 0 | 0 | 0.101 | 0 | 0 | 0 |
| bbs2      | 0 | 0 | 0 | 0.101 | 0.101 | 0 | 0 | 0 | 0 | 0.101 | 0 | 0 | 0 |
| ykt6      | 0 | 0 | 0 | 0.101 | 0.101 | 0 | 0 | 0 | 0 | 0.101 | 0 | 0 | 0 |
| trappc10  | 0 | 0 | 0 | 0.101 | 0.101 | 0 | 0 | 0 | 0 | 0.101 | 0 | 0 | 0 |
| hexa      | 0 | 0 | 0 | 0.101 | 0.101 | 0 | 0 | 0 | 0 | 0.101 | 0 | 0 | 0 |
| rai2      | 0 | 0 | 0 | 0.101 | 0.101 | 0 | 0 | 0 | 0 | 0.101 | 0 | 0 | 0 |
| muc3      | 0 | 0 | 0 | 0.101 | 0.101 | 0 | 0 | 0 | 0 | 0.101 | 0 | 0 | 0 |
| scar7     | 0 | 0 | 0 | 0.101 | 0.101 | 0 | 0 | 0 | 0 | 0.101 | 0 | 0 | 0 |
| znf73     | 0 | 0 | 0 | 0.101 | 0.101 | 0 | 0 | 0 | 0 | 0.101 | 0 | 0 | 0 |
| rpl36al   | 0 | 0 | 0 | 0.101 | 0.101 | 0 | 0 | 0 | 0 | 0.101 | 0 | 0 | 0 |
| abhd14b   | 0 | 0 | 0 | 0.101 | 0.101 | 0 | 0 | 0 | 0 | 0.101 | 0 | 0 | 0 |
| hcn1      | 0 | 0 | 0 | 0.101 | 0.101 | 0 | 0 | 0 | 0 | 0.101 | 0 | 0 | 0 |
| fmo4      | 0 | 0 | 0 | 0.101 | 0.101 | 0 | 0 | 0 | 0 | 0.101 | 0 | 0 | 0 |
| surf2     | 0 | 0 | 0 | 0.101 | 0.101 | 0 | 0 | 0 | 0 | 0.101 | 0 | 0 | 0 |
| prkx      | 0 | 0 | 0 | 0.101 | 0.101 | 0 | 0 | 0 | 0 | 0.101 | 0 | 0 | 0 |
| ankh      | 0 | 0 | 0 | 0.101 | 0.101 | 0 | 0 | 0 | 0 | 0.101 | 0 | 0 | 0 |
| eig2      | 0 | 0 | 0 | 0.101 | 0.101 | 0 | 0 | 0 | 0 | 0.101 | 0 | 0 | 0 |
| sc5d      | 0 | 0 | 0 | 0.101 | 0.101 | 0 | 0 | 0 | 0 | 0.101 | 0 | 0 | 0 |
| znf355p   | 0 | 0 | 0 | 0.105 | 0.105 | 0 | 0 | 0 | 0 | 0.105 | 0 | 0 | 0 |
| znf652p1  | 0 | 0 | 0 | 0.105 | 0.105 | 0 | 0 | 0 | 0 | 0.105 | 0 | 0 | 0 |
| hnrnpd    | 0 | 0 | 0 | 0.109 | 0.109 | 0 | 0 | 0 | 0 | 0.109 | 0 | 0 | 0 |
| zc3h4     | 0 | 0 | 0 | 0.109 | 0.109 | 0 | 0 | 0 | 0 | 0.109 | 0 | 0 | 0 |

|              |   |   |   |       |       |   |   |   |   |       |   |   |   |
|--------------|---|---|---|-------|-------|---|---|---|---|-------|---|---|---|
| slc37a1      | 0 | 0 | 0 | 0.109 | 0.109 | 0 | 0 | 0 | 0 | 0.109 | 0 | 0 | 0 |
| loc100133315 | 0 | 0 | 0 | 0.109 | 0.109 | 0 | 0 | 0 | 0 | 0.109 | 0 | 0 | 0 |
| defb105a     | 0 | 0 | 0 | 0.109 | 0.109 | 0 | 0 | 0 | 0 | 0.109 | 0 | 0 | 0 |
| ifrd2        | 0 | 0 | 0 | 0.109 | 0.109 | 0 | 0 | 0 | 0 | 0.109 | 0 | 0 | 0 |
| vdac1p3      | 0 | 0 | 0 | 0.109 | 0.109 | 0 | 0 | 0 | 0 | 0.109 | 0 | 0 | 0 |
| mpc2         | 0 | 0 | 0 | 0.109 | 0.109 | 0 | 0 | 0 | 0 | 0.109 | 0 | 0 | 0 |
| dnase2b      | 0 | 0 | 0 | 0.109 | 0.109 | 0 | 0 | 0 | 0 | 0.109 | 0 | 0 | 0 |
| itpk1        | 0 | 0 | 0 | 0.109 | 0.109 | 0 | 0 | 0 | 0 | 0.109 | 0 | 0 | 0 |
| psap         | 0 | 0 | 0 | 0.109 | 0.109 | 0 | 0 | 0 | 0 | 0.109 | 0 | 0 | 0 |
| cdh12        | 0 | 0 | 0 | 0.109 | 0.109 | 0 | 0 | 0 | 0 | 0.109 | 0 | 0 | 0 |
| kcnk4        | 0 | 0 | 0 | 0.109 | 0.109 | 0 | 0 | 0 | 0 | 0.109 | 0 | 0 | 0 |
| slc24a4      | 0 | 0 | 0 | 0.109 | 0.109 | 0 | 0 | 0 | 0 | 0.109 | 0 | 0 | 0 |
| psg1         | 0 | 0 | 0 | 0.11  | 0.11  | 0 | 0 | 0 | 0 | 0.11  | 0 | 0 | 0 |
| pla2g2a      | 0 | 0 | 0 | 0.11  | 0.11  | 0 | 0 | 0 | 0 | 0.11  | 0 | 0 | 0 |
| acot13       | 0 | 0 | 0 | 0.109 | 0.109 | 0 | 0 | 0 | 0 | 0.109 | 0 | 0 | 0 |
| clcn4        | 0 | 0 | 0 | 0.109 | 0.109 | 0 | 0 | 0 | 0 | 0.109 | 0 | 0 | 0 |
| clic2        | 0 | 0 | 0 | 0.109 | 0.109 | 0 | 0 | 0 | 0 | 0.109 | 0 | 0 | 0 |
| slc6a8       | 0 | 0 | 0 | 0.109 | 0.109 | 0 | 0 | 0 | 0 | 0.109 | 0 | 0 | 0 |
| pkdrej       | 0 | 0 | 0 | 0.109 | 0.109 | 0 | 0 | 0 | 0 | 0.109 | 0 | 0 | 0 |
| atp11a       | 0 | 0 | 0 | 0.109 | 0.109 | 0 | 0 | 0 | 0 | 0.109 | 0 | 0 | 0 |
| six3         | 0 | 0 | 0 | 0.109 | 0.109 | 0 | 0 | 0 | 0 | 0.109 | 0 | 0 | 0 |
| sma4         | 0 | 0 | 0 | 0.109 | 0.109 | 0 | 0 | 0 | 0 | 0.109 | 0 | 0 | 0 |
| hibch        | 0 | 0 | 0 | 0.108 | 0.108 | 0 | 0 | 0 | 0 | 0.108 | 0 | 0 | 0 |
| ubr7         | 0 | 0 | 0 | 0.108 | 0.108 | 0 | 0 | 0 | 0 | 0.108 | 0 | 0 | 0 |
| dsp          | 0 | 0 | 0 | 0.108 | 0.108 | 0 | 0 | 0 | 0 | 0.108 | 0 | 0 | 0 |
| atp6v1c1     | 0 | 0 | 0 | 0.108 | 0.108 | 0 | 0 | 0 | 0 | 0.108 | 0 | 0 | 0 |
| dhdds        | 0 | 0 | 0 | 0.108 | 0.108 | 0 | 0 | 0 | 0 | 0.108 | 0 | 0 | 0 |
| rps5         | 0 | 0 | 0 | 0.108 | 0.108 | 0 | 0 | 0 | 0 | 0.108 | 0 | 0 | 0 |
| aoc1         | 0 | 0 | 0 | 0.108 | 0.108 | 0 | 0 | 0 | 0 | 0.108 | 0 | 0 | 0 |
| snora72      | 0 | 0 | 0 | 0.108 | 0.108 | 0 | 0 | 0 | 0 | 0.108 | 0 | 0 | 0 |
| vmo1         | 0 | 0 | 0 | 0.108 | 0.108 | 0 | 0 | 0 | 0 | 0.108 | 0 | 0 | 0 |
| ma           | 0 | 0 | 0 | 0.108 | 0.108 | 0 | 0 | 0 | 0 | 0.108 | 0 | 0 | 0 |
| slc28a1      | 0 | 0 | 0 | 0.108 | 0.108 | 0 | 0 | 0 | 0 | 0.108 | 0 | 0 | 0 |
| pafah1b1     | 0 | 0 | 0 | 0.108 | 0.108 | 0 | 0 | 0 | 0 | 0.108 | 0 | 0 | 0 |
| muc12        | 0 | 0 | 0 | 0.109 | 0.109 | 0 | 0 | 0 | 0 | 0.109 | 0 | 0 | 0 |
| rab9bp1      | 0 | 0 | 0 | 0.109 | 0.109 | 0 | 0 | 0 | 0 | 0.109 | 0 | 0 | 0 |
| il1rap1      | 0 | 0 | 0 | 0.109 | 0.109 | 0 | 0 | 0 | 0 | 0.109 | 0 | 0 | 0 |
| prrt2        | 0 | 0 | 0 | 0.109 | 0.109 | 0 | 0 | 0 | 0 | 0.109 | 0 | 0 | 0 |
| gapdhs       | 0 | 0 | 0 | 0.109 | 0.109 | 0 | 0 | 0 | 0 | 0.109 | 0 | 0 | 0 |
| msto2p       | 0 | 0 | 0 | 0.109 | 0.109 | 0 | 0 | 0 | 0 | 0.109 | 0 | 0 | 0 |
| fstl4        | 0 | 0 | 0 | 0.108 | 0.108 | 0 | 0 | 0 | 0 | 0.108 | 0 | 0 | 0 |

|            |   |   |   |       |       |   |   |   |   |       |   |   |   |
|------------|---|---|---|-------|-------|---|---|---|---|-------|---|---|---|
| kcnab1     | 0 | 0 | 0 | 0.108 | 0.108 | 0 | 0 | 0 | 0 | 0.108 | 0 | 0 | 0 |
| cox8bp     | 0 | 0 | 0 | 0.109 | 0.109 | 0 | 0 | 0 | 0 | 0.109 | 0 | 0 | 0 |
| dap3p1     | 0 | 0 | 0 | 0.109 | 0.109 | 0 | 0 | 0 | 0 | 0.109 | 0 | 0 | 0 |
| hist1h1c   | 0 | 0 | 0 | 0.11  | 0.11  | 0 | 0 | 0 | 0 | 0.11  | 0 | 0 | 0 |
| bola3      | 0 | 0 | 0 | 0.11  | 0.11  | 0 | 0 | 0 | 0 | 0.11  | 0 | 0 | 0 |
| slc22a10   | 0 | 0 | 0 | 0.11  | 0.11  | 0 | 0 | 0 | 0 | 0.11  | 0 | 0 | 0 |
| b4galt6    | 0 | 0 | 0 | 0.11  | 0.11  | 0 | 0 | 0 | 0 | 0.11  | 0 | 0 | 0 |
| ctbs       | 0 | 0 | 0 | 0.11  | 0.11  | 0 | 0 | 0 | 0 | 0.11  | 0 | 0 | 0 |
| guca1c     | 0 | 0 | 0 | 0.11  | 0.11  | 0 | 0 | 0 | 0 | 0.11  | 0 | 0 | 0 |
| ppap2c     | 0 | 0 | 0 | 0.11  | 0.11  | 0 | 0 | 0 | 0 | 0.11  | 0 | 0 | 0 |
| dmx1       | 0 | 0 | 0 | 0.11  | 0.11  | 0 | 0 | 0 | 0 | 0.11  | 0 | 0 | 0 |
| nudt19     | 0 | 0 | 0 | 0.11  | 0.11  | 0 | 0 | 0 | 0 | 0.11  | 0 | 0 | 0 |
| rnu1-4     | 0 | 0 | 0 | 0.11  | 0.11  | 0 | 0 | 0 | 0 | 0.11  | 0 | 0 | 0 |
| rpph1      | 0 | 0 | 0 | 0.11  | 0.11  | 0 | 0 | 0 | 0 | 0.11  | 0 | 0 | 0 |
| lipf       | 0 | 0 | 0 | 0.11  | 0.11  | 0 | 0 | 0 | 0 | 0.11  | 0 | 0 | 0 |
| glt6d1     | 0 | 0 | 0 | 0.11  | 0.11  | 0 | 0 | 0 | 0 | 0.11  | 0 | 0 | 0 |
| sult1a3    | 0 | 0 | 0 | 0.11  | 0.11  | 0 | 0 | 0 | 0 | 0.11  | 0 | 0 | 0 |
| hspe1      | 0 | 0 | 0 | 0.111 | 0.111 | 0 | 0 | 0 | 0 | 0.111 | 0 | 0 | 0 |
| dnajc4     | 0 | 0 | 0 | 0.111 | 0.111 | 0 | 0 | 0 | 0 | 0.111 | 0 | 0 | 0 |
| cdh19      | 0 | 0 | 0 | 0.111 | 0.111 | 0 | 0 | 0 | 0 | 0.111 | 0 | 0 | 0 |
| dld        | 0 | 0 | 0 | 0.111 | 0.111 | 0 | 0 | 0 | 0 | 0.111 | 0 | 0 | 0 |
| ahsg       | 0 | 0 | 0 | 0.111 | 0.111 | 0 | 0 | 0 | 0 | 0.111 | 0 | 0 | 0 |
| prps1      | 0 | 0 | 0 | 0.111 | 0.111 | 0 | 0 | 0 | 0 | 0.111 | 0 | 0 | 0 |
| hcn2       | 0 | 0 | 0 | 0.111 | 0.111 | 0 | 0 | 0 | 0 | 0.111 | 0 | 0 | 0 |
| gmpr       | 0 | 0 | 0 | 0.111 | 0.111 | 0 | 0 | 0 | 0 | 0.111 | 0 | 0 | 0 |
| c21orf49   | 0 | 0 | 0 | 0.111 | 0.111 | 0 | 0 | 0 | 0 | 0.111 | 0 | 0 | 0 |
| ankrd7     | 0 | 0 | 0 | 0.111 | 0.111 | 0 | 0 | 0 | 0 | 0.111 | 0 | 0 | 0 |
| atp5f1     | 0 | 0 | 0 | 0.11  | 0.11  | 0 | 0 | 0 | 0 | 0.11  | 0 | 0 | 0 |
| hist2h2aa4 | 0 | 0 | 0 | 0.11  | 0.11  | 0 | 0 | 0 | 0 | 0.11  | 0 | 0 | 0 |
| adsl       | 0 | 0 | 0 | 0.11  | 0.11  | 0 | 0 | 0 | 0 | 0.11  | 0 | 0 | 0 |
| slc26a4    | 0 | 0 | 0 | 0.11  | 0.11  | 0 | 0 | 0 | 0 | 0.11  | 0 | 0 | 0 |
| afg3l2     | 0 | 0 | 0 | 0.11  | 0.11  | 0 | 0 | 0 | 0 | 0.11  | 0 | 0 | 0 |
| antxr1     | 0 | 0 | 0 | 0.11  | 0.11  | 0 | 0 | 0 | 0 | 0.11  | 0 | 0 | 0 |
| mrsb2      | 0 | 0 | 0 | 0.11  | 0.11  | 0 | 0 | 0 | 0 | 0.11  | 0 | 0 | 0 |
| atox1      | 0 | 0 | 0 | 0.11  | 0.11  | 0 | 0 | 0 | 0 | 0.11  | 0 | 0 | 0 |
| gk6p       | 0 | 0 | 0 | 0.11  | 0.11  | 0 | 0 | 0 | 0 | 0.11  | 0 | 0 | 0 |
| feb7       | 0 | 0 | 0 | 0.11  | 0.11  | 0 | 0 | 0 | 0 | 0.11  | 0 | 0 | 0 |
| elk2ap     | 0 | 0 | 0 | 0.11  | 0.11  | 0 | 0 | 0 | 0 | 0.11  | 0 | 0 | 0 |
| htn1       | 0 | 0 | 0 | 0.11  | 0.11  | 0 | 0 | 0 | 0 | 0.11  | 0 | 0 | 0 |
| kcnj10     | 0 | 0 | 0 | 0.11  | 0.11  | 0 | 0 | 0 | 0 | 0.11  | 0 | 0 | 0 |
| ppp3cb     | 0 | 0 | 0 | 0.11  | 0.11  | 0 | 0 | 0 | 0 | 0.11  | 0 | 0 | 0 |

|          |   |   |   |       |       |   |   |   |   |       |   |   |   |
|----------|---|---|---|-------|-------|---|---|---|---|-------|---|---|---|
| faup1    | 0 | 0 | 0 | 0.11  | 0.11  | 0 | 0 | 0 | 0 | 0.11  | 0 | 0 | 0 |
| rp3l     | 0 | 0 | 0 | 0.11  | 0.11  | 0 | 0 | 0 | 0 | 0.11  | 0 | 0 | 0 |
| pcdh9    | 0 | 0 | 0 | 0.11  | 0.11  | 0 | 0 | 0 | 0 | 0.11  | 0 | 0 | 0 |
| emc4     | 0 | 0 | 0 | 0.11  | 0.11  | 0 | 0 | 0 | 0 | 0.11  | 0 | 0 | 0 |
| c19orf59 | 0 | 0 | 0 | 0.11  | 0.11  | 0 | 0 | 0 | 0 | 0.11  | 0 | 0 | 0 |
| atp5g1   | 0 | 0 | 0 | 0.11  | 0.11  | 0 | 0 | 0 | 0 | 0.11  | 0 | 0 | 0 |
| kcnq3    | 0 | 0 | 0 | 0.11  | 0.11  | 0 | 0 | 0 | 0 | 0.11  | 0 | 0 | 0 |
| prpf18   | 0 | 0 | 0 | 0.11  | 0.11  | 0 | 0 | 0 | 0 | 0.11  | 0 | 0 | 0 |
| snrnp200 | 0 | 0 | 0 | 0.11  | 0.11  | 0 | 0 | 0 | 0 | 0.11  | 0 | 0 | 0 |
| upk1b    | 0 | 0 | 0 | 0.108 | 0.108 | 0 | 0 | 0 | 0 | 0.108 | 0 | 0 | 0 |
| slc9a3r2 | 0 | 0 | 0 | 0.108 | 0.108 | 0 | 0 | 0 | 0 | 0.108 | 0 | 0 | 0 |
| tmem27   | 0 | 0 | 0 | 0.106 | 0.106 | 0 | 0 | 0 | 0 | 0.106 | 0 | 0 | 0 |
| kcnn3    | 0 | 0 | 0 | 0.106 | 0.106 | 0 | 0 | 0 | 0 | 0.106 | 0 | 0 | 0 |
| vwap1    | 0 | 0 | 0 | 0.106 | 0.106 | 0 | 0 | 0 | 0 | 0.106 | 0 | 0 | 0 |
| u2af2    | 0 | 0 | 0 | 0.106 | 0.106 | 0 | 0 | 0 | 0 | 0.106 | 0 | 0 | 0 |
| slc30a10 | 0 | 0 | 0 | 0.106 | 0.106 | 0 | 0 | 0 | 0 | 0.106 | 0 | 0 | 0 |
| emid1    | 0 | 0 | 0 | 0.106 | 0.106 | 0 | 0 | 0 | 0 | 0.106 | 0 | 0 | 0 |
| hyal4    | 0 | 0 | 0 | 0.106 | 0.106 | 0 | 0 | 0 | 0 | 0.106 | 0 | 0 | 0 |
| nfat5    | 0 | 0 | 0 | 0.106 | 0.106 | 0 | 0 | 0 | 0 | 0.106 | 0 | 0 | 0 |
| sytl2    | 0 | 0 | 0 | 0.106 | 0.106 | 0 | 0 | 0 | 0 | 0.106 | 0 | 0 | 0 |
| six2     | 0 | 0 | 0 | 0.106 | 0.106 | 0 | 0 | 0 | 0 | 0.106 | 0 | 0 | 0 |
| uba52p1  | 0 | 0 | 0 | 0.106 | 0.106 | 0 | 0 | 0 | 0 | 0.106 | 0 | 0 | 0 |
| uba52p2  | 0 | 0 | 0 | 0.106 | 0.106 | 0 | 0 | 0 | 0 | 0.106 | 0 | 0 | 0 |
| psg10p   | 0 | 0 | 0 | 0.106 | 0.106 | 0 | 0 | 0 | 0 | 0.106 | 0 | 0 | 0 |
| slc13a1  | 0 | 0 | 0 | 0.106 | 0.106 | 0 | 0 | 0 | 0 | 0.106 | 0 | 0 | 0 |
| rpn2     | 0 | 0 | 0 | 0.106 | 0.106 | 0 | 0 | 0 | 0 | 0.106 | 0 | 0 | 0 |
| rph3a    | 0 | 0 | 0 | 0.106 | 0.106 | 0 | 0 | 0 | 0 | 0.106 | 0 | 0 | 0 |
| pctp     | 0 | 0 | 0 | 0.106 | 0.106 | 0 | 0 | 0 | 0 | 0.106 | 0 | 0 | 0 |
| pate1    | 0 | 0 | 0 | 0.106 | 0.106 | 0 | 0 | 0 | 0 | 0.106 | 0 | 0 | 0 |
| pigap1   | 0 | 0 | 0 | 0.106 | 0.106 | 0 | 0 | 0 | 0 | 0.106 | 0 | 0 | 0 |
| cpo      | 0 | 0 | 0 | 0.106 | 0.106 | 0 | 0 | 0 | 0 | 0.106 | 0 | 0 | 0 |
| tdrd6    | 0 | 0 | 0 | 0.106 | 0.106 | 0 | 0 | 0 | 0 | 0.106 | 0 | 0 | 0 |
| prdx1    | 0 | 0 | 0 | 0.106 | 0.106 | 0 | 0 | 0 | 0 | 0.106 | 0 | 0 | 0 |
| pfn3     | 0 | 0 | 0 | 0.106 | 0.106 | 0 | 0 | 0 | 0 | 0.106 | 0 | 0 | 0 |
| alrh     | 0 | 0 | 0 | 0.106 | 0.106 | 0 | 0 | 0 | 0 | 0.106 | 0 | 0 | 0 |
| cbx4     | 0 | 0 | 0 | 0.105 | 0.105 | 0 | 0 | 0 | 0 | 0.105 | 0 | 0 | 0 |
| rmbp2    | 0 | 0 | 0 | 0.105 | 0.105 | 0 | 0 | 0 | 0 | 0.105 | 0 | 0 | 0 |
| ndufaf1  | 0 | 0 | 0 | 0.105 | 0.105 | 0 | 0 | 0 | 0 | 0.105 | 0 | 0 | 0 |
| pign     | 0 | 0 | 0 | 0.105 | 0.105 | 0 | 0 | 0 | 0 | 0.105 | 0 | 0 | 0 |
| best2    | 0 | 0 | 0 | 0.105 | 0.105 | 0 | 0 | 0 | 0 | 0.105 | 0 | 0 | 0 |
| ervk-20  | 0 | 0 | 0 | 0.105 | 0.105 | 0 | 0 | 0 | 0 | 0.105 | 0 | 0 | 0 |

|             |   |   |   |       |       |   |   |   |   |       |   |   |   |
|-------------|---|---|---|-------|-------|---|---|---|---|-------|---|---|---|
| dhx15       | 0 | 0 | 0 | 0.105 | 0.105 | 0 | 0 | 0 | 0 | 0.105 | 0 | 0 | 0 |
| pqbp4       | 0 | 0 | 0 | 0.105 | 0.105 | 0 | 0 | 0 | 0 | 0.105 | 0 | 0 | 0 |
| hmx2        | 0 | 0 | 0 | 0.105 | 0.105 | 0 | 0 | 0 | 0 | 0.105 | 0 | 0 | 0 |
| crygfp      | 0 | 0 | 0 | 0.105 | 0.105 | 0 | 0 | 0 | 0 | 0.105 | 0 | 0 | 0 |
| slc15a4     | 0 | 0 | 0 | 0.105 | 0.105 | 0 | 0 | 0 | 0 | 0.105 | 0 | 0 | 0 |
| linc00114   | 0 | 0 | 0 | 0.105 | 0.105 | 0 | 0 | 0 | 0 | 0.105 | 0 | 0 | 0 |
| hdgfl1      | 0 | 0 | 0 | 0.106 | 0.106 | 0 | 0 | 0 | 0 | 0.106 | 0 | 0 | 0 |
| crtac1      | 0 | 0 | 0 | 0.106 | 0.106 | 0 | 0 | 0 | 0 | 0.106 | 0 | 0 | 0 |
| pla2g2d     | 0 | 0 | 0 | 0.106 | 0.106 | 0 | 0 | 0 | 0 | 0.106 | 0 | 0 | 0 |
| mon1a       | 0 | 0 | 0 | 0.106 | 0.106 | 0 | 0 | 0 | 0 | 0.106 | 0 | 0 | 0 |
| mat2b       | 0 | 0 | 0 | 0.106 | 0.106 | 0 | 0 | 0 | 0 | 0.106 | 0 | 0 | 0 |
| zdhhc1      | 0 | 0 | 0 | 0.105 | 0.105 | 0 | 0 | 0 | 0 | 0.105 | 0 | 0 | 0 |
| cpvl        | 0 | 0 | 0 | 0.105 | 0.105 | 0 | 0 | 0 | 0 | 0.105 | 0 | 0 | 0 |
| khbyn       | 0 | 0 | 0 | 0.105 | 0.105 | 0 | 0 | 0 | 0 | 0.105 | 0 | 0 | 0 |
| ext1        | 0 | 0 | 0 | 0.105 | 0.105 | 0 | 0 | 0 | 0 | 0.105 | 0 | 0 | 0 |
| adrm1       | 0 | 0 | 0 | 0.105 | 0.105 | 0 | 0 | 0 | 0 | 0.105 | 0 | 0 | 0 |
| nicn1       | 0 | 0 | 0 | 0.106 | 0.106 | 0 | 0 | 0 | 0 | 0.106 | 0 | 0 | 0 |
| pds5b       | 0 | 0 | 0 | 0.106 | 0.106 | 0 | 0 | 0 | 0 | 0.106 | 0 | 0 | 0 |
| tpi1        | 0 | 0 | 0 | 0.108 | 0.108 | 0 | 0 | 0 | 0 | 0.108 | 0 | 0 | 0 |
| arsep1      | 0 | 0 | 0 | 0.108 | 0.108 | 0 | 0 | 0 | 0 | 0.108 | 0 | 0 | 0 |
| vn2r1p      | 0 | 0 | 0 | 0.108 | 0.108 | 0 | 0 | 0 | 0 | 0.108 | 0 | 0 | 0 |
| rpl35a      | 0 | 0 | 0 | 0.108 | 0.108 | 0 | 0 | 0 | 0 | 0.108 | 0 | 0 | 0 |
| galt        | 0 | 0 | 0 | 0.108 | 0.108 | 0 | 0 | 0 | 0 | 0.108 | 0 | 0 | 0 |
| actg1p10    | 0 | 0 | 0 | 0.108 | 0.108 | 0 | 0 | 0 | 0 | 0.108 | 0 | 0 | 0 |
| ndufs3      | 0 | 0 | 0 | 0.107 | 0.107 | 0 | 0 | 0 | 0 | 0.107 | 0 | 0 | 0 |
| gucy2f      | 0 | 0 | 0 | 0.107 | 0.107 | 0 | 0 | 0 | 0 | 0.107 | 0 | 0 | 0 |
| spag7       | 0 | 0 | 0 | 0.107 | 0.107 | 0 | 0 | 0 | 0 | 0.107 | 0 | 0 | 0 |
| oatp1       | 0 | 0 | 0 | 0.107 | 0.107 | 0 | 0 | 0 | 0 | 0.107 | 0 | 0 | 0 |
| pth1r       | 0 | 0 | 0 | 0.108 | 0.108 | 0 | 0 | 0 | 0 | 0.108 | 0 | 0 | 0 |
| slc43a3     | 0 | 0 | 0 | 0.108 | 0.108 | 0 | 0 | 0 | 0 | 0.108 | 0 | 0 | 0 |
| tulp4       | 0 | 0 | 0 | 0.108 | 0.108 | 0 | 0 | 0 | 0 | 0.108 | 0 | 0 | 0 |
| tuba1c      | 0 | 0 | 0 | 0.108 | 0.108 | 0 | 0 | 0 | 0 | 0.108 | 0 | 0 | 0 |
| vsnl1       | 0 | 0 | 0 | 0.108 | 0.108 | 0 | 0 | 0 | 0 | 0.108 | 0 | 0 | 0 |
| ncapd2      | 0 | 0 | 0 | 0.108 | 0.108 | 0 | 0 | 0 | 0 | 0.108 | 0 | 0 | 0 |
| ces5a       | 0 | 0 | 0 | 0.108 | 0.108 | 0 | 0 | 0 | 0 | 0.108 | 0 | 0 | 0 |
| krt2        | 0 | 0 | 0 | 0.108 | 0.108 | 0 | 0 | 0 | 0 | 0.108 | 0 | 0 | 0 |
| hist1h2aps5 | 0 | 0 | 0 | 0.108 | 0.108 | 0 | 0 | 0 | 0 | 0.108 | 0 | 0 | 0 |
| fzd10       | 0 | 0 | 0 | 0.108 | 0.108 | 0 | 0 | 0 | 0 | 0.108 | 0 | 0 | 0 |
| poc1b       | 0 | 0 | 0 | 0.108 | 0.108 | 0 | 0 | 0 | 0 | 0.108 | 0 | 0 | 0 |
| mepe        | 0 | 0 | 0 | 0.108 | 0.108 | 0 | 0 | 0 | 0 | 0.108 | 0 | 0 | 0 |
| mmgt1       | 0 | 0 | 0 | 0.107 | 0.107 | 0 | 0 | 0 | 0 | 0.107 | 0 | 0 | 0 |

|           |   |   |   |       |       |   |   |   |   |       |   |   |   |
|-----------|---|---|---|-------|-------|---|---|---|---|-------|---|---|---|
| znf71     | 0 | 0 | 0 | 0.107 | 0.107 | 0 | 0 | 0 | 0 | 0.107 | 0 | 0 | 0 |
| mir338    | 0 | 0 | 0 | 0.107 | 0.107 | 0 | 0 | 0 | 0 | 0.107 | 0 | 0 | 0 |
| catsper1  | 0 | 0 | 0 | 0.107 | 0.107 | 0 | 0 | 0 | 0 | 0.107 | 0 | 0 | 0 |
| impact    | 0 | 0 | 0 | 0.107 | 0.107 | 0 | 0 | 0 | 0 | 0.107 | 0 | 0 | 0 |
| slc39a13  | 0 | 0 | 0 | 0.107 | 0.107 | 0 | 0 | 0 | 0 | 0.107 | 0 | 0 | 0 |
| kcnj3     | 0 | 0 | 0 | 0.107 | 0.107 | 0 | 0 | 0 | 0 | 0.107 | 0 | 0 | 0 |
| dnah6     | 0 | 0 | 0 | 0.107 | 0.107 | 0 | 0 | 0 | 0 | 0.107 | 0 | 0 | 0 |
| appl1     | 0 | 0 | 0 | 0.106 | 0.106 | 0 | 0 | 0 | 0 | 0.106 | 0 | 0 | 0 |
| dach1     | 0 | 0 | 0 | 0.107 | 0.107 | 0 | 0 | 0 | 0 | 0.107 | 0 | 0 | 0 |
| loc1720   | 0 | 0 | 0 | 0.107 | 0.107 | 0 | 0 | 0 | 0 | 0.107 | 0 | 0 | 0 |
| dnah10    | 0 | 0 | 0 | 0.107 | 0.107 | 0 | 0 | 0 | 0 | 0.107 | 0 | 0 | 0 |
| jph4      | 0 | 0 | 0 | 0.107 | 0.107 | 0 | 0 | 0 | 0 | 0.107 | 0 | 0 | 0 |
| cdh16     | 0 | 0 | 0 | 0.107 | 0.107 | 0 | 0 | 0 | 0 | 0.107 | 0 | 0 | 0 |
| paox      | 0 | 0 | 0 | 0.107 | 0.107 | 0 | 0 | 0 | 0 | 0.107 | 0 | 0 | 0 |
| slc5a8    | 0 | 0 | 0 | 0.107 | 0.107 | 0 | 0 | 0 | 0 | 0.107 | 0 | 0 | 0 |
| prm2      | 0 | 0 | 0 | 0.107 | 0.107 | 0 | 0 | 0 | 0 | 0.107 | 0 | 0 | 0 |
| ush1g     | 0 | 0 | 0 | 0.107 | 0.107 | 0 | 0 | 0 | 0 | 0.107 | 0 | 0 | 0 |
| ppap2a    | 0 | 0 | 0 | 0.107 | 0.107 | 0 | 0 | 0 | 0 | 0.107 | 0 | 0 | 0 |
| neto2     | 0 | 0 | 0 | 0.107 | 0.107 | 0 | 0 | 0 | 0 | 0.107 | 0 | 0 | 0 |
| syt5      | 0 | 0 | 0 | 0.107 | 0.107 | 0 | 0 | 0 | 0 | 0.107 | 0 | 0 | 0 |
| prps2     | 0 | 0 | 0 | 0.107 | 0.107 | 0 | 0 | 0 | 0 | 0.107 | 0 | 0 | 0 |
| fbxw12    | 0 | 0 | 0 | 0.107 | 0.107 | 0 | 0 | 0 | 0 | 0.107 | 0 | 0 | 0 |
| slc9b1    | 0 | 0 | 0 | 0.111 | 0.111 | 0 | 0 | 0 | 0 | 0.111 | 0 | 0 | 0 |
| nfu1      | 0 | 0 | 0 | 0.142 | 0.142 | 0 | 0 | 0 | 0 | 0.142 | 0 | 0 | 0 |
| fgf23     | 0 | 0 | 0 | 0.159 | 0.159 | 0 | 0 | 0 | 0 | 0.159 | 0 | 0 | 0 |
| atp13a5   | 0 | 0 | 0 | 0.159 | 0.159 | 0 | 0 | 0 | 0 | 0.159 | 0 | 0 | 0 |
| emb       | 0 | 0 | 0 | 0.16  | 0.16  | 0 | 0 | 0 | 0 | 0.16  | 0 | 0 | 0 |
| frmd7     | 0 | 0 | 0 | 0.16  | 0.16  | 0 | 0 | 0 | 0 | 0.16  | 0 | 0 | 0 |
| candf1    | 0 | 0 | 0 | 0.159 | 0.159 | 0 | 0 | 0 | 0 | 0.159 | 0 | 0 | 0 |
| rgn       | 0 | 0 | 0 | 0.159 | 0.159 | 0 | 0 | 0 | 0 | 0.159 | 0 | 0 | 0 |
| atp2a3    | 0 | 0 | 0 | 0.159 | 0.159 | 0 | 0 | 0 | 0 | 0.159 | 0 | 0 | 0 |
| lalba     | 0 | 0 | 0 | 0.159 | 0.159 | 0 | 0 | 0 | 0 | 0.159 | 0 | 0 | 0 |
| hist2h2ba | 0 | 0 | 0 | 0.159 | 0.159 | 0 | 0 | 0 | 0 | 0.159 | 0 | 0 | 0 |
| mir328    | 0 | 0 | 0 | 0.159 | 0.159 | 0 | 0 | 0 | 0 | 0.159 | 0 | 0 | 0 |
| slc22a1   | 0 | 0 | 0 | 0.16  | 0.16  | 0 | 0 | 0 | 0 | 0.16  | 0 | 0 | 0 |
| edc3      | 0 | 0 | 0 | 0.16  | 0.16  | 0 | 0 | 0 | 0 | 0.16  | 0 | 0 | 0 |
| slc1a5    | 0 | 0 | 0 | 0.161 | 0.161 | 0 | 0 | 0 | 0 | 0.161 | 0 | 0 | 0 |
| trpc4     | 0 | 0 | 0 | 0.161 | 0.161 | 0 | 0 | 0 | 0 | 0.161 | 0 | 0 | 0 |
| ivd       | 0 | 0 | 0 | 0.162 | 0.162 | 0 | 0 | 0 | 0 | 0.162 | 0 | 0 | 0 |
| sgk2      | 0 | 0 | 0 | 0.162 | 0.162 | 0 | 0 | 0 | 0 | 0.162 | 0 | 0 | 0 |
| slc22a24  | 0 | 0 | 0 | 0.161 | 0.161 | 0 | 0 | 0 | 0 | 0.161 | 0 | 0 | 0 |

|              |   |   |   |       |       |   |   |   |   |       |   |   |   |
|--------------|---|---|---|-------|-------|---|---|---|---|-------|---|---|---|
| prpsap1      | 0 | 0 | 0 | 0.161 | 0.161 | 0 | 0 | 0 | 0 | 0.161 | 0 | 0 | 0 |
| hist2h2bc    | 0 | 0 | 0 | 0.16  | 0.16  | 0 | 0 | 0 | 0 | 0.16  | 0 | 0 | 0 |
| cpne9        | 0 | 0 | 0 | 0.16  | 0.16  | 0 | 0 | 0 | 0 | 0.16  | 0 | 0 | 0 |
| slc28a3      | 0 | 0 | 0 | 0.16  | 0.16  | 0 | 0 | 0 | 0 | 0.16  | 0 | 0 | 0 |
| slc12a6      | 0 | 0 | 0 | 0.16  | 0.16  | 0 | 0 | 0 | 0 | 0.16  | 0 | 0 | 0 |
| cse          | 0 | 0 | 0 | 0.159 | 0.159 | 0 | 0 | 0 | 0 | 0.159 | 0 | 0 | 0 |
| lim2         | 0 | 0 | 0 | 0.158 | 0.158 | 0 | 0 | 0 | 0 | 0.158 | 0 | 0 | 0 |
| slc22a6      | 0 | 0 | 0 | 0.156 | 0.156 | 0 | 0 | 0 | 0 | 0.156 | 0 | 0 | 0 |
| slc26a11     | 0 | 0 | 0 | 0.156 | 0.156 | 0 | 0 | 0 | 0 | 0.156 | 0 | 0 | 0 |
| agmat        | 0 | 0 | 0 | 0.157 | 0.157 | 0 | 0 | 0 | 0 | 0.157 | 0 | 0 | 0 |
| mocs2        | 0 | 0 | 0 | 0.157 | 0.157 | 0 | 0 | 0 | 0 | 0.157 | 0 | 0 | 0 |
| trpc3        | 0 | 0 | 0 | 0.156 | 0.156 | 0 | 0 | 0 | 0 | 0.156 | 0 | 0 | 0 |
| c8orf44-sgk3 | 0 | 0 | 0 | 0.156 | 0.156 | 0 | 0 | 0 | 0 | 0.156 | 0 | 0 | 0 |
| nicn2p       | 0 | 0 | 0 | 0.156 | 0.156 | 0 | 0 | 0 | 0 | 0.156 | 0 | 0 | 0 |
| cpa2         | 0 | 0 | 0 | 0.156 | 0.156 | 0 | 0 | 0 | 0 | 0.156 | 0 | 0 | 0 |
| alg13        | 0 | 0 | 0 | 0.156 | 0.156 | 0 | 0 | 0 | 0 | 0.156 | 0 | 0 | 0 |
| sdc4         | 0 | 0 | 0 | 0.156 | 0.156 | 0 | 0 | 0 | 0 | 0.156 | 0 | 0 | 0 |
| chp1         | 0 | 0 | 0 | 0.157 | 0.157 | 0 | 0 | 0 | 0 | 0.157 | 0 | 0 | 0 |
| aldob        | 0 | 0 | 0 | 0.157 | 0.157 | 0 | 0 | 0 | 0 | 0.157 | 0 | 0 | 0 |
| slc16a5      | 0 | 0 | 0 | 0.158 | 0.158 | 0 | 0 | 0 | 0 | 0.158 | 0 | 0 | 0 |
| atp5d        | 0 | 0 | 0 | 0.158 | 0.158 | 0 | 0 | 0 | 0 | 0.158 | 0 | 0 | 0 |
| ceacam8      | 0 | 0 | 0 | 0.158 | 0.158 | 0 | 0 | 0 | 0 | 0.158 | 0 | 0 | 0 |
| ankrd36c     | 0 | 0 | 0 | 0.158 | 0.158 | 0 | 0 | 0 | 0 | 0.158 | 0 | 0 | 0 |
| anxa8l2      | 0 | 0 | 0 | 0.158 | 0.158 | 0 | 0 | 0 | 0 | 0.158 | 0 | 0 | 0 |
| slc23a2      | 0 | 0 | 0 | 0.157 | 0.157 | 0 | 0 | 0 | 0 | 0.157 | 0 | 0 | 0 |
| slc6a15      | 0 | 0 | 0 | 0.157 | 0.157 | 0 | 0 | 0 | 0 | 0.157 | 0 | 0 | 0 |
| pnpla8       | 0 | 0 | 0 | 0.157 | 0.157 | 0 | 0 | 0 | 0 | 0.157 | 0 | 0 | 0 |
| foxe3        | 0 | 0 | 0 | 0.157 | 0.157 | 0 | 0 | 0 | 0 | 0.157 | 0 | 0 | 0 |
| psg6         | 0 | 0 | 0 | 0.157 | 0.157 | 0 | 0 | 0 | 0 | 0.157 | 0 | 0 | 0 |
| syncn        | 0 | 0 | 0 | 0.162 | 0.162 | 0 | 0 | 0 | 0 | 0.162 | 0 | 0 | 0 |
| pigg         | 0 | 0 | 0 | 0.162 | 0.162 | 0 | 0 | 0 | 0 | 0.162 | 0 | 0 | 0 |
| rnu2-1       | 0 | 0 | 0 | 0.168 | 0.168 | 0 | 0 | 0 | 0 | 0.168 | 0 | 0 | 0 |
| s100g        | 0 | 0 | 0 | 0.168 | 0.168 | 0 | 0 | 0 | 0 | 0.168 | 0 | 0 | 0 |
| slc8a3       | 0 | 0 | 0 | 0.169 | 0.169 | 0 | 0 | 0 | 0 | 0.169 | 0 | 0 | 0 |
| hspb7        | 0 | 0 | 0 | 0.169 | 0.169 | 0 | 0 | 0 | 0 | 0.169 | 0 | 0 | 0 |
| c12orf4      | 0 | 0 | 0 | 0.168 | 0.168 | 0 | 0 | 0 | 0 | 0.168 | 0 | 0 | 0 |
| cd53         | 0 | 0 | 0 | 0.168 | 0.168 | 0 | 0 | 0 | 0 | 0.168 | 0 | 0 | 0 |
| trpm7        | 0 | 0 | 0 | 0.167 | 0.167 | 0 | 0 | 0 | 0 | 0.167 | 0 | 0 | 0 |
| catcn1       | 0 | 0 | 0 | 0.168 | 0.168 | 0 | 0 | 0 | 0 | 0.168 | 0 | 0 | 0 |
| apeh         | 0 | 0 | 0 | 0.168 | 0.168 | 0 | 0 | 0 | 0 | 0.168 | 0 | 0 | 0 |
| cldn14       | 0 | 0 | 0 | 0.168 | 0.168 | 0 | 0 | 0 | 0 | 0.168 | 0 | 0 | 0 |

|         |   |   |   |       |       |   |   |   |   |       |   |   |   |
|---------|---|---|---|-------|-------|---|---|---|---|-------|---|---|---|
| btg1    | 0 | 0 | 0 | 0.169 | 0.169 | 0 | 0 | 0 | 0 | 0.169 | 0 | 0 | 0 |
| tars    | 0 | 0 | 0 | 0.17  | 0.17  | 0 | 0 | 0 | 0 | 0.17  | 0 | 0 | 0 |
| amy1b   | 0 | 0 | 0 | 0.171 | 0.171 | 0 | 0 | 0 | 0 | 0.171 | 0 | 0 | 0 |
| slc12a7 | 0 | 0 | 0 | 0.171 | 0.171 | 0 | 0 | 0 | 0 | 0.171 | 0 | 0 | 0 |
| gcsh    | 0 | 0 | 0 | 0.171 | 0.171 | 0 | 0 | 0 | 0 | 0.171 | 0 | 0 | 0 |
| dym     | 0 | 0 | 0 | 0.172 | 0.172 | 0 | 0 | 0 | 0 | 0.172 | 0 | 0 | 0 |
| slc16a3 | 0 | 0 | 0 | 0.171 | 0.171 | 0 | 0 | 0 | 0 | 0.171 | 0 | 0 | 0 |
| clcnkb  | 0 | 0 | 0 | 0.171 | 0.171 | 0 | 0 | 0 | 0 | 0.171 | 0 | 0 | 0 |
| sgk1    | 0 | 0 | 0 | 0.17  | 0.17  | 0 | 0 | 0 | 0 | 0.17  | 0 | 0 | 0 |
| kcnj16  | 0 | 0 | 0 | 0.17  | 0.17  | 0 | 0 | 0 | 0 | 0.17  | 0 | 0 | 0 |
| slc3a1  | 0 | 0 | 0 | 0.17  | 0.17  | 0 | 0 | 0 | 0 | 0.17  | 0 | 0 | 0 |
| ca13    | 0 | 0 | 0 | 0.171 | 0.171 | 0 | 0 | 0 | 0 | 0.171 | 0 | 0 | 0 |
| surf4   | 0 | 0 | 0 | 0.167 | 0.167 | 0 | 0 | 0 | 0 | 0.167 | 0 | 0 | 0 |
| hhc3    | 0 | 0 | 0 | 0.167 | 0.167 | 0 | 0 | 0 | 0 | 0.167 | 0 | 0 | 0 |
| hspp6   | 0 | 0 | 0 | 0.163 | 0.163 | 0 | 0 | 0 | 0 | 0.163 | 0 | 0 | 0 |
| s100a16 | 0 | 0 | 0 | 0.164 | 0.164 | 0 | 0 | 0 | 0 | 0.164 | 0 | 0 | 0 |
| nhs     | 0 | 0 | 0 | 0.164 | 0.164 | 0 | 0 | 0 | 0 | 0.164 | 0 | 0 | 0 |
| slc26a6 | 0 | 0 | 0 | 0.164 | 0.164 | 0 | 0 | 0 | 0 | 0.164 | 0 | 0 | 0 |
| atp8a1  | 0 | 0 | 0 | 0.163 | 0.163 | 0 | 0 | 0 | 0 | 0.163 | 0 | 0 | 0 |
| slc9a3  | 0 | 0 | 0 | 0.163 | 0.163 | 0 | 0 | 0 | 0 | 0.163 | 0 | 0 | 0 |
| acr1    | 0 | 0 | 0 | 0.162 | 0.162 | 0 | 0 | 0 | 0 | 0.162 | 0 | 0 | 0 |
| nys2    | 0 | 0 | 0 | 0.162 | 0.162 | 0 | 0 | 0 | 0 | 0.162 | 0 | 0 | 0 |
| bckdhb  | 0 | 0 | 0 | 0.162 | 0.162 | 0 | 0 | 0 | 0 | 0.162 | 0 | 0 | 0 |
| slc8b1  | 0 | 0 | 0 | 0.163 | 0.163 | 0 | 0 | 0 | 0 | 0.163 | 0 | 0 | 0 |
| spesp1  | 0 | 0 | 0 | 0.164 | 0.164 | 0 | 0 | 0 | 0 | 0.164 | 0 | 0 | 0 |
| rhcg    | 0 | 0 | 0 | 0.165 | 0.165 | 0 | 0 | 0 | 0 | 0.165 | 0 | 0 | 0 |
| clcn3   | 0 | 0 | 0 | 0.166 | 0.166 | 0 | 0 | 0 | 0 | 0.166 | 0 | 0 | 0 |
| ocm2    | 0 | 0 | 0 | 0.166 | 0.166 | 0 | 0 | 0 | 0 | 0.166 | 0 | 0 | 0 |
| hsppap1 | 0 | 0 | 0 | 0.167 | 0.167 | 0 | 0 | 0 | 0 | 0.167 | 0 | 0 | 0 |
| rnf24   | 0 | 0 | 0 | 0.167 | 0.167 | 0 | 0 | 0 | 0 | 0.167 | 0 | 0 | 0 |
| atp1b3  | 0 | 0 | 0 | 0.166 | 0.166 | 0 | 0 | 0 | 0 | 0.166 | 0 | 0 | 0 |
| slc16a1 | 0 | 0 | 0 | 0.166 | 0.166 | 0 | 0 | 0 | 0 | 0.166 | 0 | 0 | 0 |
| gingf2  | 0 | 0 | 0 | 0.165 | 0.165 | 0 | 0 | 0 | 0 | 0.165 | 0 | 0 | 0 |
| slc13a2 | 0 | 0 | 0 | 0.165 | 0.165 | 0 | 0 | 0 | 0 | 0.165 | 0 | 0 | 0 |
| slc47a1 | 0 | 0 | 0 | 0.165 | 0.165 | 0 | 0 | 0 | 0 | 0.165 | 0 | 0 | 0 |
| crym    | 0 | 0 | 0 | 0.166 | 0.166 | 0 | 0 | 0 | 0 | 0.166 | 0 | 0 | 0 |
| hint2   | 0 | 0 | 0 | 0.156 | 0.156 | 0 | 0 | 0 | 0 | 0.156 | 0 | 0 | 0 |
| txndc2  | 0 | 0 | 0 | 0.156 | 0.156 | 0 | 0 | 0 | 0 | 0.156 | 0 | 0 | 0 |
| ttpa    | 0 | 0 | 0 | 0.147 | 0.147 | 0 | 0 | 0 | 0 | 0.147 | 0 | 0 | 0 |
| grifin  | 0 | 0 | 0 | 0.148 | 0.148 | 0 | 0 | 0 | 0 | 0.148 | 0 | 0 | 0 |
| caln1   | 0 | 0 | 0 | 0.148 | 0.148 | 0 | 0 | 0 | 0 | 0.148 | 0 | 0 | 0 |

|          |   |   |   |       |       |   |   |   |   |       |   |   |   |
|----------|---|---|---|-------|-------|---|---|---|---|-------|---|---|---|
| nudt10   | 0 | 0 | 0 | 0.148 | 0.148 | 0 | 0 | 0 | 0 | 0.148 | 0 | 0 | 0 |
| snora67  | 0 | 0 | 0 | 0.147 | 0.147 | 0 | 0 | 0 | 0 | 0.147 | 0 | 0 | 0 |
| snora68  | 0 | 0 | 0 | 0.147 | 0.147 | 0 | 0 | 0 | 0 | 0.147 | 0 | 0 | 0 |
| slc6a19  | 0 | 0 | 0 | 0.147 | 0.147 | 0 | 0 | 0 | 0 | 0.147 | 0 | 0 | 0 |
| slc4a8   | 0 | 0 | 0 | 0.147 | 0.147 | 0 | 0 | 0 | 0 | 0.147 | 0 | 0 | 0 |
| khsrp    | 0 | 0 | 0 | 0.147 | 0.147 | 0 | 0 | 0 | 0 | 0.147 | 0 | 0 | 0 |
| anxa7    | 0 | 0 | 0 | 0.147 | 0.147 | 0 | 0 | 0 | 0 | 0.147 | 0 | 0 | 0 |
| atp13a1  | 0 | 0 | 0 | 0.148 | 0.148 | 0 | 0 | 0 | 0 | 0.148 | 0 | 0 | 0 |
| ca12     | 0 | 0 | 0 | 0.148 | 0.148 | 0 | 0 | 0 | 0 | 0.148 | 0 | 0 | 0 |
| lyrm4    | 0 | 0 | 0 | 0.149 | 0.149 | 0 | 0 | 0 | 0 | 0.149 | 0 | 0 | 0 |
| lpar5    | 0 | 0 | 0 | 0.149 | 0.149 | 0 | 0 | 0 | 0 | 0.149 | 0 | 0 | 0 |
| txndc15  | 0 | 0 | 0 | 0.149 | 0.149 | 0 | 0 | 0 | 0 | 0.149 | 0 | 0 | 0 |
| fra1e    | 0 | 0 | 0 | 0.149 | 0.149 | 0 | 0 | 0 | 0 | 0.149 | 0 | 0 | 0 |
| lcn1     | 0 | 0 | 0 | 0.149 | 0.149 | 0 | 0 | 0 | 0 | 0.149 | 0 | 0 | 0 |
| tufm     | 0 | 0 | 0 | 0.148 | 0.148 | 0 | 0 | 0 | 0 | 0.148 | 0 | 0 | 0 |
| slc9a3p1 | 0 | 0 | 0 | 0.148 | 0.148 | 0 | 0 | 0 | 0 | 0.148 | 0 | 0 | 0 |
| svop     | 0 | 0 | 0 | 0.148 | 0.148 | 0 | 0 | 0 | 0 | 0.148 | 0 | 0 | 0 |
| oit3     | 0 | 0 | 0 | 0.148 | 0.148 | 0 | 0 | 0 | 0 | 0.148 | 0 | 0 | 0 |
| cryz     | 0 | 0 | 0 | 0.148 | 0.148 | 0 | 0 | 0 | 0 | 0.148 | 0 | 0 | 0 |
| nrgn     | 0 | 0 | 0 | 0.147 | 0.147 | 0 | 0 | 0 | 0 | 0.147 | 0 | 0 | 0 |
| mir15a   | 0 | 0 | 0 | 0.146 | 0.146 | 0 | 0 | 0 | 0 | 0.146 | 0 | 0 | 0 |
| ldhap3   | 0 | 0 | 0 | 0.145 | 0.145 | 0 | 0 | 0 | 0 | 0.145 | 0 | 0 | 0 |
| ldhap5   | 0 | 0 | 0 | 0.145 | 0.145 | 0 | 0 | 0 | 0 | 0.145 | 0 | 0 | 0 |
| ccdc47   | 0 | 0 | 0 | 0.145 | 0.145 | 0 | 0 | 0 | 0 | 0.145 | 0 | 0 | 0 |
| akr1a1   | 0 | 0 | 0 | 0.145 | 0.145 | 0 | 0 | 0 | 0 | 0.145 | 0 | 0 | 0 |
| lrrn3    | 0 | 0 | 0 | 0.145 | 0.145 | 0 | 0 | 0 | 0 | 0.145 | 0 | 0 | 0 |
| lrp1b    | 0 | 0 | 0 | 0.145 | 0.145 | 0 | 0 | 0 | 0 | 0.145 | 0 | 0 | 0 |
| atp1a4   | 0 | 0 | 0 | 0.145 | 0.145 | 0 | 0 | 0 | 0 | 0.145 | 0 | 0 | 0 |
| hdhd1    | 0 | 0 | 0 | 0.145 | 0.145 | 0 | 0 | 0 | 0 | 0.145 | 0 | 0 | 0 |
| ndufs2   | 0 | 0 | 0 | 0.145 | 0.145 | 0 | 0 | 0 | 0 | 0.145 | 0 | 0 | 0 |
| pi4ka    | 0 | 0 | 0 | 0.145 | 0.145 | 0 | 0 | 0 | 0 | 0.145 | 0 | 0 | 0 |
| ndufv2p1 | 0 | 0 | 0 | 0.146 | 0.146 | 0 | 0 | 0 | 0 | 0.146 | 0 | 0 | 0 |
| clpp     | 0 | 0 | 0 | 0.146 | 0.146 | 0 | 0 | 0 | 0 | 0.146 | 0 | 0 | 0 |
| slc9a2   | 0 | 0 | 0 | 0.146 | 0.146 | 0 | 0 | 0 | 0 | 0.146 | 0 | 0 | 0 |
| atp6v1b1 | 0 | 0 | 0 | 0.146 | 0.146 | 0 | 0 | 0 | 0 | 0.146 | 0 | 0 | 0 |
| ncs1     | 0 | 0 | 0 | 0.146 | 0.146 | 0 | 0 | 0 | 0 | 0.146 | 0 | 0 | 0 |
| hmgn1    | 0 | 0 | 0 | 0.146 | 0.146 | 0 | 0 | 0 | 0 | 0.146 | 0 | 0 | 0 |
| jmjd7    | 0 | 0 | 0 | 0.146 | 0.146 | 0 | 0 | 0 | 0 | 0.146 | 0 | 0 | 0 |
| anxa2p2  | 0 | 0 | 0 | 0.146 | 0.146 | 0 | 0 | 0 | 0 | 0.146 | 0 | 0 | 0 |
| qars     | 0 | 0 | 0 | 0.146 | 0.146 | 0 | 0 | 0 | 0 | 0.146 | 0 | 0 | 0 |
| s100a7p1 | 0 | 0 | 0 | 0.146 | 0.146 | 0 | 0 | 0 | 0 | 0.146 | 0 | 0 | 0 |

|            |   |   |   |       |       |   |   |   |   |       |   |   |   |
|------------|---|---|---|-------|-------|---|---|---|---|-------|---|---|---|
| s100a7p2   | 0 | 0 | 0 | 0.146 | 0.146 | 0 | 0 | 0 | 0 | 0.146 | 0 | 0 | 0 |
| glud2      | 0 | 0 | 0 | 0.146 | 0.146 | 0 | 0 | 0 | 0 | 0.146 | 0 | 0 | 0 |
| adam12-ot1 | 0 | 0 | 0 | 0.149 | 0.149 | 0 | 0 | 0 | 0 | 0.149 | 0 | 0 | 0 |
| slc26a3    | 0 | 0 | 0 | 0.149 | 0.149 | 0 | 0 | 0 | 0 | 0.149 | 0 | 0 | 0 |
| atp6v0a4   | 0 | 0 | 0 | 0.154 | 0.154 | 0 | 0 | 0 | 0 | 0.154 | 0 | 0 | 0 |
| eno3       | 0 | 0 | 0 | 0.154 | 0.154 | 0 | 0 | 0 | 0 | 0.154 | 0 | 0 | 0 |
| slc7a6os   | 0 | 0 | 0 | 0.154 | 0.154 | 0 | 0 | 0 | 0 | 0.154 | 0 | 0 | 0 |
| pkd2       | 0 | 0 | 0 | 0.154 | 0.154 | 0 | 0 | 0 | 0 | 0.154 | 0 | 0 | 0 |
| amd1       | 0 | 0 | 0 | 0.154 | 0.154 | 0 | 0 | 0 | 0 | 0.154 | 0 | 0 | 0 |
| samsn1     | 0 | 0 | 0 | 0.154 | 0.154 | 0 | 0 | 0 | 0 | 0.154 | 0 | 0 | 0 |
| pcca       | 0 | 0 | 0 | 0.153 | 0.153 | 0 | 0 | 0 | 0 | 0.153 | 0 | 0 | 0 |
| rnu4-1     | 0 | 0 | 0 | 0.153 | 0.153 | 0 | 0 | 0 | 0 | 0.153 | 0 | 0 | 0 |
| slc4a10    | 0 | 0 | 0 | 0.153 | 0.153 | 0 | 0 | 0 | 0 | 0.153 | 0 | 0 | 0 |
| slc6a14    | 0 | 0 | 0 | 0.153 | 0.153 | 0 | 0 | 0 | 0 | 0.153 | 0 | 0 | 0 |
| crip1p4    | 0 | 0 | 0 | 0.155 | 0.155 | 0 | 0 | 0 | 0 | 0.155 | 0 | 0 | 0 |
| crip1p2    | 0 | 0 | 0 | 0.155 | 0.155 | 0 | 0 | 0 | 0 | 0.155 | 0 | 0 | 0 |
| pef1       | 0 | 0 | 0 | 0.155 | 0.155 | 0 | 0 | 0 | 0 | 0.155 | 0 | 0 | 0 |
| pafah1b3   | 0 | 0 | 0 | 0.155 | 0.155 | 0 | 0 | 0 | 0 | 0.155 | 0 | 0 | 0 |
| bsn        | 0 | 0 | 0 | 0.155 | 0.155 | 0 | 0 | 0 | 0 | 0.155 | 0 | 0 | 0 |
| rsc1a1     | 0 | 0 | 0 | 0.155 | 0.155 | 0 | 0 | 0 | 0 | 0.155 | 0 | 0 | 0 |
| atp6v1e2   | 0 | 0 | 0 | 0.155 | 0.155 | 0 | 0 | 0 | 0 | 0.155 | 0 | 0 | 0 |
| cry1       | 0 | 0 | 0 | 0.155 | 0.155 | 0 | 0 | 0 | 0 | 0.155 | 0 | 0 | 0 |
| kl         | 0 | 0 | 0 | 0.155 | 0.155 | 0 | 0 | 0 | 0 | 0.155 | 0 | 0 | 0 |
| slc28a2    | 0 | 0 | 0 | 0.155 | 0.155 | 0 | 0 | 0 | 0 | 0.155 | 0 | 0 | 0 |
| cplx4      | 0 | 0 | 0 | 0.155 | 0.155 | 0 | 0 | 0 | 0 | 0.155 | 0 | 0 | 0 |
| ctaa1      | 0 | 0 | 0 | 0.155 | 0.155 | 0 | 0 | 0 | 0 | 0.155 | 0 | 0 | 0 |
| ca14       | 0 | 0 | 0 | 0.153 | 0.153 | 0 | 0 | 0 | 0 | 0.153 | 0 | 0 | 0 |
| mcu        | 0 | 0 | 0 | 0.152 | 0.152 | 0 | 0 | 0 | 0 | 0.152 | 0 | 0 | 0 |
| aldoc      | 0 | 0 | 0 | 0.15  | 0.15  | 0 | 0 | 0 | 0 | 0.15  | 0 | 0 | 0 |
| grhpr      | 0 | 0 | 0 | 0.15  | 0.15  | 0 | 0 | 0 | 0 | 0.15  | 0 | 0 | 0 |
| rasgef1b   | 0 | 0 | 0 | 0.15  | 0.15  | 0 | 0 | 0 | 0 | 0.15  | 0 | 0 | 0 |
| nudt16     | 0 | 0 | 0 | 0.151 | 0.151 | 0 | 0 | 0 | 0 | 0.151 | 0 | 0 | 0 |
| cpd        | 0 | 0 | 0 | 0.15  | 0.15  | 0 | 0 | 0 | 0 | 0.15  | 0 | 0 | 0 |
| ndufa1     | 0 | 0 | 0 | 0.15  | 0.15  | 0 | 0 | 0 | 0 | 0.15  | 0 | 0 | 0 |
| mcee       | 0 | 0 | 0 | 0.149 | 0.149 | 0 | 0 | 0 | 0 | 0.149 | 0 | 0 | 0 |
| snora75    | 0 | 0 | 0 | 0.15  | 0.15  | 0 | 0 | 0 | 0 | 0.15  | 0 | 0 | 0 |
| nme9       | 0 | 0 | 0 | 0.15  | 0.15  | 0 | 0 | 0 | 0 | 0.15  | 0 | 0 | 0 |
| nxpe2      | 0 | 0 | 0 | 0.15  | 0.15  | 0 | 0 | 0 | 0 | 0.15  | 0 | 0 | 0 |
| slc38a5    | 0 | 0 | 0 | 0.151 | 0.151 | 0 | 0 | 0 | 0 | 0.151 | 0 | 0 | 0 |
| tmem33     | 0 | 0 | 0 | 0.151 | 0.151 | 0 | 0 | 0 | 0 | 0.151 | 0 | 0 | 0 |
| pum2       | 0 | 0 | 0 | 0.152 | 0.152 | 0 | 0 | 0 | 0 | 0.152 | 0 | 0 | 0 |

|          |   |   |   |       |       |   |   |   |   |       |   |   |   |
|----------|---|---|---|-------|-------|---|---|---|---|-------|---|---|---|
| slc9a4   | 0 | 0 | 0 | 0.152 | 0.152 | 0 | 0 | 0 | 0 | 0.152 | 0 | 0 | 0 |
| ldhap4   | 0 | 0 | 0 | 0.152 | 0.152 | 0 | 0 | 0 | 0 | 0.152 | 0 | 0 | 0 |
| slc5a12  | 0 | 0 | 0 | 0.152 | 0.152 | 0 | 0 | 0 | 0 | 0.152 | 0 | 0 | 0 |
| or1d5    | 0 | 0 | 0 | 0.152 | 0.152 | 0 | 0 | 0 | 0 | 0.152 | 0 | 0 | 0 |
| lgalsl   | 0 | 0 | 0 | 0.151 | 0.151 | 0 | 0 | 0 | 0 | 0.151 | 0 | 0 | 0 |
| gucy2gp  | 0 | 0 | 0 | 0.151 | 0.151 | 0 | 0 | 0 | 0 | 0.151 | 0 | 0 | 0 |
| tsfm     | 0 | 0 | 0 | 0.151 | 0.151 | 0 | 0 | 0 | 0 | 0.151 | 0 | 0 | 0 |
| ca7      | 0 | 0 | 0 | 0.151 | 0.151 | 0 | 0 | 0 | 0 | 0.151 | 0 | 0 | 0 |
| dsc2     | 0 | 0 | 0 | 0.172 | 0.172 | 0 | 0 | 0 | 0 | 0.172 | 0 | 0 | 0 |
| ctxn3    | 0 | 0 | 0 | 0.172 | 0.172 | 0 | 0 | 0 | 0 | 0.172 | 0 | 0 | 0 |
| lacrt    | 0 | 0 | 0 | 0.218 | 0.218 | 0 | 0 | 0 | 0 | 0.218 | 0 | 0 | 0 |
| akap7    | 0 | 0 | 0 | 0.218 | 0.218 | 0 | 0 | 0 | 0 | 0.218 | 0 | 0 | 0 |
| slc34a1  | 0 | 0 | 0 | 0.218 | 0.218 | 0 | 0 | 0 | 0 | 0.218 | 0 | 0 | 0 |
| clcn5    | 0 | 0 | 0 | 0.219 | 0.219 | 0 | 0 | 0 | 0 | 0.219 | 0 | 0 | 0 |
| pam      | 0 | 0 | 0 | 0.218 | 0.218 | 0 | 0 | 0 | 0 | 0.218 | 0 | 0 | 0 |
| cryab    | 0 | 0 | 0 | 0.218 | 0.218 | 0 | 0 | 0 | 0 | 0.218 | 0 | 0 | 0 |
| atp6v1e1 | 0 | 0 | 0 | 0.214 | 0.214 | 0 | 0 | 0 | 0 | 0.214 | 0 | 0 | 0 |
| slc34a3  | 0 | 0 | 0 | 0.215 | 0.215 | 0 | 0 | 0 | 0 | 0.215 | 0 | 0 | 0 |
| slc12a1  | 0 | 0 | 0 | 0.215 | 0.215 | 0 | 0 | 0 | 0 | 0.215 | 0 | 0 | 0 |
| s100a11  | 0 | 0 | 0 | 0.217 | 0.217 | 0 | 0 | 0 | 0 | 0.217 | 0 | 0 | 0 |
| slc47a2  | 0 | 0 | 0 | 0.219 | 0.219 | 0 | 0 | 0 | 0 | 0.219 | 0 | 0 | 0 |
| wnk4     | 0 | 0 | 0 | 0.22  | 0.22  | 0 | 0 | 0 | 0 | 0.22  | 0 | 0 | 0 |
| clip2    | 0 | 0 | 0 | 0.224 | 0.224 | 0 | 0 | 0 | 0 | 0.224 | 0 | 0 | 0 |
| slc38a3  | 0 | 0 | 0 | 0.225 | 0.225 | 0 | 0 | 0 | 0 | 0.225 | 0 | 0 | 0 |
| mip      | 0 | 0 | 0 | 0.225 | 0.225 | 0 | 0 | 0 | 0 | 0.225 | 0 | 0 | 0 |
| cryaa    | 0 | 0 | 0 | 0.228 | 0.228 | 0 | 0 | 0 | 0 | 0.228 | 0 | 0 | 0 |
| rpl10    | 0 | 0 | 0 | 0.223 | 0.223 | 0 | 0 | 0 | 0 | 0.223 | 0 | 0 | 0 |
| pla2g6   | 0 | 0 | 0 | 0.223 | 0.223 | 0 | 0 | 0 | 0 | 0.223 | 0 | 0 | 0 |
| entpd6   | 0 | 0 | 0 | 0.221 | 0.221 | 0 | 0 | 0 | 0 | 0.221 | 0 | 0 | 0 |
| slc20a2  | 0 | 0 | 0 | 0.222 | 0.222 | 0 | 0 | 0 | 0 | 0.222 | 0 | 0 | 0 |
| ces4a    | 0 | 0 | 0 | 0.222 | 0.222 | 0 | 0 | 0 | 0 | 0.222 | 0 | 0 | 0 |
| crybb2p1 | 0 | 0 | 0 | 0.222 | 0.222 | 0 | 0 | 0 | 0 | 0.222 | 0 | 0 | 0 |
| oa17     | 0 | 0 | 0 | 0.213 | 0.213 | 0 | 0 | 0 | 0 | 0.213 | 0 | 0 | 0 |
| oap      | 0 | 0 | 0 | 0.213 | 0.213 | 0 | 0 | 0 | 0 | 0.213 | 0 | 0 | 0 |
| kcnk13   | 0 | 0 | 0 | 0.2   | 0.2   | 0 | 0 | 0 | 0 | 0.2   | 0 | 0 | 0 |
| hspb2    | 0 | 0 | 0 | 0.201 | 0.201 | 0 | 0 | 0 | 0 | 0.201 | 0 | 0 | 0 |
| casr     | 0 | 0 | 0 | 0.201 | 0.201 | 0 | 0 | 0 | 0 | 0.201 | 0 | 0 | 0 |
| sgk3     | 0 | 0 | 0 | 0.201 | 0.201 | 0 | 0 | 0 | 0 | 0.201 | 0 | 0 | 0 |
| hspb9    | 0 | 0 | 0 | 0.2   | 0.2   | 0 | 0 | 0 | 0 | 0.2   | 0 | 0 | 0 |
| slc16a12 | 0 | 0 | 0 | 0.199 | 0.199 | 0 | 0 | 0 | 0 | 0.199 | 0 | 0 | 0 |
| p4hb     | 0 | 0 | 0 | 0.199 | 0.199 | 0 | 0 | 0 | 0 | 0.199 | 0 | 0 | 0 |

|              |   |   |   |       |       |   |   |   |   |       |   |   |   |
|--------------|---|---|---|-------|-------|---|---|---|---|-------|---|---|---|
| slc23a1      | 0 | 0 | 0 | 0.199 | 0.199 | 0 | 0 | 0 | 0 | 0.199 | 0 | 0 | 0 |
| slc12a4      | 0 | 0 | 0 | 0.199 | 0.199 | 0 | 0 | 0 | 0 | 0.199 | 0 | 0 | 0 |
| cyctp        | 0 | 0 | 0 | 0.199 | 0.199 | 0 | 0 | 0 | 0 | 0.199 | 0 | 0 | 0 |
| loc100508689 | 0 | 0 | 0 | 0.201 | 0.201 | 0 | 0 | 0 | 0 | 0.201 | 0 | 0 | 0 |
| slc12a3      | 0 | 0 | 0 | 0.202 | 0.202 | 0 | 0 | 0 | 0 | 0.202 | 0 | 0 | 0 |
| cabp5        | 0 | 0 | 0 | 0.208 | 0.208 | 0 | 0 | 0 | 0 | 0.208 | 0 | 0 | 0 |
| supv311      | 0 | 0 | 0 | 0.209 | 0.209 | 0 | 0 | 0 | 0 | 0.209 | 0 | 0 | 0 |
| pigw         | 0 | 0 | 0 | 0.21  | 0.21  | 0 | 0 | 0 | 0 | 0.21  | 0 | 0 | 0 |
| znf706       | 0 | 0 | 0 | 0.211 | 0.211 | 0 | 0 | 0 | 0 | 0.211 | 0 | 0 | 0 |
| hist2h2bd    | 0 | 0 | 0 | 0.206 | 0.206 | 0 | 0 | 0 | 0 | 0.206 | 0 | 0 | 0 |
| folr1p1      | 0 | 0 | 0 | 0.206 | 0.206 | 0 | 0 | 0 | 0 | 0.206 | 0 | 0 | 0 |
| cabp7        | 0 | 0 | 0 | 0.202 | 0.202 | 0 | 0 | 0 | 0 | 0.202 | 0 | 0 | 0 |
| slc4a4       | 0 | 0 | 0 | 0.203 | 0.203 | 0 | 0 | 0 | 0 | 0.203 | 0 | 0 | 0 |
| wbp1l        | 0 | 0 | 0 | 0.204 | 0.204 | 0 | 0 | 0 | 0 | 0.204 | 0 | 0 | 0 |
| phlpp2       | 0 | 0 | 0 | 0.206 | 0.206 | 0 | 0 | 0 | 0 | 0.206 | 0 | 0 | 0 |
| nrn1         | 0 | 0 | 0 | 0.229 | 0.229 | 0 | 0 | 0 | 0 | 0.229 | 0 | 0 | 0 |
| trpm6        | 0 | 0 | 0 | 0.23  | 0.23  | 0 | 0 | 0 | 0 | 0.23  | 0 | 0 | 0 |
| mzf1         | 0 | 0 | 0 | 0.291 | 0.291 | 0 | 0 | 0 | 0 | 0.291 | 0 | 0 | 0 |
| pde1a        | 0 | 0 | 0 | 0.292 | 0.292 | 0 | 0 | 0 | 0 | 0.292 | 0 | 0 | 0 |
| fkbp10       | 0 | 0 | 0 | 0.293 | 0.293 | 0 | 0 | 0 | 0 | 0.293 | 0 | 0 | 0 |
| prap1        | 0 | 0 | 0 | 0.3   | 0.3   | 0 | 0 | 0 | 0 | 0.3   | 0 | 0 | 0 |
| gpm6a        | 0 | 0 | 0 | 0.288 | 0.288 | 0 | 0 | 0 | 0 | 0.288 | 0 | 0 | 0 |
| crygb        | 0 | 0 | 0 | 0.276 | 0.276 | 0 | 0 | 0 | 0 | 0.276 | 0 | 0 | 0 |
| cryba2       | 0 | 0 | 0 | 0.259 | 0.259 | 0 | 0 | 0 | 0 | 0.259 | 0 | 0 | 0 |
| cryba4       | 0 | 0 | 0 | 0.262 | 0.262 | 0 | 0 | 0 | 0 | 0.262 | 0 | 0 | 0 |
| crygs        | 0 | 0 | 0 | 0.263 | 0.263 | 0 | 0 | 0 | 0 | 0.263 | 0 | 0 | 0 |
| semg2        | 0 | 0 | 0 | 0.272 | 0.272 | 0 | 0 | 0 | 0 | 0.272 | 0 | 0 | 0 |
| xkry         | 0 | 0 | 0 | 0.301 | 0.301 | 0 | 0 | 0 | 0 | 0.301 | 0 | 0 | 0 |
| rps26p25     | 0 | 0 | 0 | 0.305 | 0.305 | 0 | 0 | 0 | 0 | 0.305 | 0 | 0 | 0 |
| ralbp1       | 0 | 0 | 0 | 0.373 | 0.373 | 0 | 0 | 0 | 0 | 0.373 | 0 | 0 | 0 |
| sdpr         | 0 | 0 | 0 | 0.394 | 0.394 | 0 | 0 | 0 | 0 | 0.394 | 0 | 0 | 0 |
| dgkd         | 0 | 0 | 0 | 0.419 | 0.419 | 0 | 0 | 0 | 0 | 0.419 | 0 | 0 | 0 |
| prr14l       | 0 | 0 | 0 | 0.436 | 0.436 | 0 | 0 | 0 | 0 | 0.436 | 0 | 0 | 0 |
| lcorl        | 0 | 0 | 0 | 0.353 | 0.353 | 0 | 0 | 0 | 0 | 0.353 | 0 | 0 | 0 |
| vn1r17p      | 0 | 0 | 0 | 0.337 | 0.337 | 0 | 0 | 0 | 0 | 0.337 | 0 | 0 | 0 |
| camsap2      | 0 | 0 | 0 | 0.315 | 0.315 | 0 | 0 | 0 | 0 | 0.315 | 0 | 0 | 0 |
| trpv5        | 0 | 0 | 0 | 0.318 | 0.318 | 0 | 0 | 0 | 0 | 0.318 | 0 | 0 | 0 |
| linc00598    | 0 | 0 | 0 | 0.322 | 0.322 | 0 | 0 | 0 | 0 | 0.322 | 0 | 0 | 0 |
| trpv6        | 0 | 0 | 0 | 0.329 | 0.329 | 0 | 0 | 0 | 0 | 0.329 | 0 | 0 | 0 |
| crygc        | 0 | 0 | 0 | 0.259 | 0.259 | 0 | 0 | 0 | 0 | 0.259 | 0 | 0 | 0 |
| g3bp2        | 0 | 0 | 0 | 0.257 | 0.257 | 0 | 0 | 0 | 0 | 0.257 | 0 | 0 | 0 |

|           |   |   |   |       |       |   |   |   |   |       |   |   |   |
|-----------|---|---|---|-------|-------|---|---|---|---|-------|---|---|---|
| gja8      | 0 | 0 | 0 | 0.235 | 0.235 | 0 | 0 | 0 | 0 | 0.235 | 0 | 0 | 0 |
| hrnr      | 0 | 0 | 0 | 0.235 | 0.235 | 0 | 0 | 0 | 0 | 0.235 | 0 | 0 | 0 |
| cryba1    | 0 | 0 | 0 | 0.236 | 0.236 | 0 | 0 | 0 | 0 | 0.236 | 0 | 0 | 0 |
| adcy7     | 0 | 0 | 0 | 0.237 | 0.237 | 0 | 0 | 0 | 0 | 0.237 | 0 | 0 | 0 |
| fxyd2     | 0 | 0 | 0 | 0.235 | 0.235 | 0 | 0 | 0 | 0 | 0.235 | 0 | 0 | 0 |
| card10    | 0 | 0 | 0 | 0.233 | 0.233 | 0 | 0 | 0 | 0 | 0.233 | 0 | 0 | 0 |
| hist1h2aj | 0 | 0 | 0 | 0.231 | 0.231 | 0 | 0 | 0 | 0 | 0.231 | 0 | 0 | 0 |
| tmem141   | 0 | 0 | 0 | 0.231 | 0.231 | 0 | 0 | 0 | 0 | 0.231 | 0 | 0 | 0 |
| semg1     | 0 | 0 | 0 | 0.231 | 0.231 | 0 | 0 | 0 | 0 | 0.231 | 0 | 0 | 0 |
| atp2b2    | 0 | 0 | 0 | 0.233 | 0.233 | 0 | 0 | 0 | 0 | 0.233 | 0 | 0 | 0 |
| atp2b1    | 0 | 0 | 0 | 0.237 | 0.237 | 0 | 0 | 0 | 0 | 0.237 | 0 | 0 | 0 |
| slc12a8   | 0 | 0 | 0 | 0.239 | 0.239 | 0 | 0 | 0 | 0 | 0.239 | 0 | 0 | 0 |
| pick1     | 0 | 0 | 0 | 0.255 | 0.255 | 0 | 0 | 0 | 0 | 0.255 | 0 | 0 | 0 |
| atp6v1g3  | 0 | 0 | 0 | 0.255 | 0.255 | 0 | 0 | 0 | 0 | 0.255 | 0 | 0 | 0 |
| crybb2    | 0 | 0 | 0 | 0.255 | 0.255 | 0 | 0 | 0 | 0 | 0.255 | 0 | 0 | 0 |
| arse      | 0 | 0 | 0 | 0.257 | 0.257 | 0 | 0 | 0 | 0 | 0.257 | 0 | 0 | 0 |
| prkd2     | 0 | 0 | 0 | 0.252 | 0.252 | 0 | 0 | 0 | 0 | 0.252 | 0 | 0 | 0 |
| crybb1    | 0 | 0 | 0 | 0.251 | 0.251 | 0 | 0 | 0 | 0 | 0.251 | 0 | 0 | 0 |
| crybb3    | 0 | 0 | 0 | 0.242 | 0.242 | 0 | 0 | 0 | 0 | 0.242 | 0 | 0 | 0 |
| dyt10     | 0 | 0 | 0 | 0.244 | 0.244 | 0 | 0 | 0 | 0 | 0.244 | 0 | 0 | 0 |
| camsap3   | 0 | 0 | 0 | 0.246 | 0.246 | 0 | 0 | 0 | 0 | 0.246 | 0 | 0 | 0 |
| dnah8     | 0 | 0 | 0 | 0.198 | 0.198 | 0 | 0 | 0 | 0 | 0.198 | 0 | 0 | 0 |
| cca5      | 0 | 0 | 0 | 0.198 | 0.198 | 0 | 0 | 0 | 0 | 0.198 | 0 | 0 | 0 |
| atp1a2    | 0 | 0 | 0 | 0.178 | 0.178 | 0 | 0 | 0 | 0 | 0.178 | 0 | 0 | 0 |
| atp1a1    | 0 | 0 | 0 | 0.178 | 0.178 | 0 | 0 | 0 | 0 | 0.178 | 0 | 0 | 0 |
| slc8a1    | 0 | 0 | 0 | 0.179 | 0.179 | 0 | 0 | 0 | 0 | 0.179 | 0 | 0 | 0 |
| pkd2l2    | 0 | 0 | 0 | 0.179 | 0.179 | 0 | 0 | 0 | 0 | 0.179 | 0 | 0 | 0 |
| dhrs7     | 0 | 0 | 0 | 0.178 | 0.178 | 0 | 0 | 0 | 0 | 0.178 | 0 | 0 | 0 |
| slc13a5   | 0 | 0 | 0 | 0.177 | 0.177 | 0 | 0 | 0 | 0 | 0.177 | 0 | 0 | 0 |
| awat2     | 0 | 0 | 0 | 0.177 | 0.177 | 0 | 0 | 0 | 0 | 0.177 | 0 | 0 | 0 |
| dolpp1    | 0 | 0 | 0 | 0.177 | 0.177 | 0 | 0 | 0 | 0 | 0.177 | 0 | 0 | 0 |
| fgd2      | 0 | 0 | 0 | 0.177 | 0.177 | 0 | 0 | 0 | 0 | 0.177 | 0 | 0 | 0 |
| slc8a2    | 0 | 0 | 0 | 0.177 | 0.177 | 0 | 0 | 0 | 0 | 0.177 | 0 | 0 | 0 |
| slc7a14   | 0 | 0 | 0 | 0.179 | 0.179 | 0 | 0 | 0 | 0 | 0.179 | 0 | 0 | 0 |
| slc41a2   | 0 | 0 | 0 | 0.179 | 0.179 | 0 | 0 | 0 | 0 | 0.179 | 0 | 0 | 0 |
| atp12a    | 0 | 0 | 0 | 0.18  | 0.18  | 0 | 0 | 0 | 0 | 0.18  | 0 | 0 | 0 |
| slc26a7   | 0 | 0 | 0 | 0.18  | 0.18  | 0 | 0 | 0 | 0 | 0.18  | 0 | 0 | 0 |
| crybg3    | 0 | 0 | 0 | 0.18  | 0.18  | 0 | 0 | 0 | 0 | 0.18  | 0 | 0 | 0 |
| got2      | 0 | 0 | 0 | 0.18  | 0.18  | 0 | 0 | 0 | 0 | 0.18  | 0 | 0 | 0 |
| slc12a9   | 0 | 0 | 0 | 0.18  | 0.18  | 0 | 0 | 0 | 0 | 0.18  | 0 | 0 | 0 |
| ca5a      | 0 | 0 | 0 | 0.18  | 0.18  | 0 | 0 | 0 | 0 | 0.18  | 0 | 0 | 0 |

|          |   |   |   |       |       |   |   |   |   |       |   |   |   |
|----------|---|---|---|-------|-------|---|---|---|---|-------|---|---|---|
| mcoln3   | 0 | 0 | 0 | 0.179 | 0.179 | 0 | 0 | 0 | 0 | 0.179 | 0 | 0 | 0 |
| ca1      | 0 | 0 | 0 | 0.179 | 0.179 | 0 | 0 | 0 | 0 | 0.179 | 0 | 0 | 0 |
| cldn16   | 0 | 0 | 0 | 0.179 | 0.179 | 0 | 0 | 0 | 0 | 0.179 | 0 | 0 | 0 |
| rhbg     | 0 | 0 | 0 | 0.18  | 0.18  | 0 | 0 | 0 | 0 | 0.18  | 0 | 0 | 0 |
| acss1    | 0 | 0 | 0 | 0.176 | 0.176 | 0 | 0 | 0 | 0 | 0.176 | 0 | 0 | 0 |
| slc6a18  | 0 | 0 | 0 | 0.176 | 0.176 | 0 | 0 | 0 | 0 | 0.176 | 0 | 0 | 0 |
| ndufs8   | 0 | 0 | 0 | 0.173 | 0.173 | 0 | 0 | 0 | 0 | 0.173 | 0 | 0 | 0 |
| slc36a1  | 0 | 0 | 0 | 0.173 | 0.173 | 0 | 0 | 0 | 0 | 0.173 | 0 | 0 | 0 |
| trpc7    | 0 | 0 | 0 | 0.173 | 0.173 | 0 | 0 | 0 | 0 | 0.173 | 0 | 0 | 0 |
| slc13a3  | 0 | 0 | 0 | 0.174 | 0.174 | 0 | 0 | 0 | 0 | 0.174 | 0 | 0 | 0 |
| melk     | 0 | 0 | 0 | 0.173 | 0.173 | 0 | 0 | 0 | 0 | 0.173 | 0 | 0 | 0 |
| akap16bp | 0 | 0 | 0 | 0.173 | 0.173 | 0 | 0 | 0 | 0 | 0.173 | 0 | 0 | 0 |
| cnga1    | 0 | 0 | 0 | 0.172 | 0.172 | 0 | 0 | 0 | 0 | 0.172 | 0 | 0 | 0 |
| fam65a   | 0 | 0 | 0 | 0.173 | 0.173 | 0 | 0 | 0 | 0 | 0.173 | 0 | 0 | 0 |
| atp1b1   | 0 | 0 | 0 | 0.173 | 0.173 | 0 | 0 | 0 | 0 | 0.173 | 0 | 0 | 0 |
| btd      | 0 | 0 | 0 | 0.173 | 0.173 | 0 | 0 | 0 | 0 | 0.173 | 0 | 0 | 0 |
| ca6      | 0 | 0 | 0 | 0.174 | 0.174 | 0 | 0 | 0 | 0 | 0.174 | 0 | 0 | 0 |
| sestd1   | 0 | 0 | 0 | 0.174 | 0.174 | 0 | 0 | 0 | 0 | 0.174 | 0 | 0 | 0 |
| hspb8    | 0 | 0 | 0 | 0.176 | 0.176 | 0 | 0 | 0 | 0 | 0.176 | 0 | 0 | 0 |
| h2bfm    | 0 | 0 | 0 | 0.176 | 0.176 | 0 | 0 | 0 | 0 | 0.176 | 0 | 0 | 0 |
| fxyd4    | 0 | 0 | 0 | 0.176 | 0.176 | 0 | 0 | 0 | 0 | 0.176 | 0 | 0 | 0 |
| trpc5    | 0 | 0 | 0 | 0.176 | 0.176 | 0 | 0 | 0 | 0 | 0.176 | 0 | 0 | 0 |
| bbx      | 0 | 0 | 0 | 0.176 | 0.176 | 0 | 0 | 0 | 0 | 0.176 | 0 | 0 | 0 |
| slc4a5   | 0 | 0 | 0 | 0.176 | 0.176 | 0 | 0 | 0 | 0 | 0.176 | 0 | 0 | 0 |
| atp13a4  | 0 | 0 | 0 | 0.174 | 0.174 | 0 | 0 | 0 | 0 | 0.174 | 0 | 0 | 0 |
| atp1a3   | 0 | 0 | 0 | 0.174 | 0.174 | 0 | 0 | 0 | 0 | 0.174 | 0 | 0 | 0 |
| ca4      | 0 | 0 | 0 | 0.174 | 0.174 | 0 | 0 | 0 | 0 | 0.174 | 0 | 0 | 0 |
| impa1    | 0 | 0 | 0 | 0.175 | 0.175 | 0 | 0 | 0 | 0 | 0.175 | 0 | 0 | 0 |
| atp2c1   | 0 | 0 | 0 | 0.181 | 0.181 | 0 | 0 | 0 | 0 | 0.181 | 0 | 0 | 0 |
| slc20a1  | 0 | 0 | 0 | 0.181 | 0.181 | 0 | 0 | 0 | 0 | 0.181 | 0 | 0 | 0 |
| slc22a2  | 0 | 0 | 0 | 0.193 | 0.193 | 0 | 0 | 0 | 0 | 0.193 | 0 | 0 | 0 |
| nefl1    | 0 | 0 | 0 | 0.193 | 0.193 | 0 | 0 | 0 | 0 | 0.193 | 0 | 0 | 0 |
| trpc6    | 0 | 0 | 0 | 0.194 | 0.194 | 0 | 0 | 0 | 0 | 0.194 | 0 | 0 | 0 |
| dhrs4    | 0 | 0 | 0 | 0.194 | 0.194 | 0 | 0 | 0 | 0 | 0.194 | 0 | 0 | 0 |
| bpnt1    | 0 | 0 | 0 | 0.193 | 0.193 | 0 | 0 | 0 | 0 | 0.193 | 0 | 0 | 0 |
| glud1    | 0 | 0 | 0 | 0.193 | 0.193 | 0 | 0 | 0 | 0 | 0.193 | 0 | 0 | 0 |
| dopey2   | 0 | 0 | 0 | 0.19  | 0.19  | 0 | 0 | 0 | 0 | 0.19  | 0 | 0 | 0 |
| add3     | 0 | 0 | 0 | 0.192 | 0.192 | 0 | 0 | 0 | 0 | 0.192 | 0 | 0 | 0 |
| slc6a9   | 0 | 0 | 0 | 0.192 | 0.192 | 0 | 0 | 0 | 0 | 0.192 | 0 | 0 | 0 |
| atp2c2   | 0 | 0 | 0 | 0.192 | 0.192 | 0 | 0 | 0 | 0 | 0.192 | 0 | 0 | 0 |
| wisp2    | 0 | 0 | 0 | 0.194 | 0.194 | 0 | 0 | 0 | 0 | 0.194 | 0 | 0 | 0 |

|          |   |   |   |       |       |   |   |   |   |       |   |   |   |
|----------|---|---|---|-------|-------|---|---|---|---|-------|---|---|---|
| cryzp1   | 0 | 0 | 0 | 0.194 | 0.194 | 0 | 0 | 0 | 0 | 0.194 | 0 | 0 | 0 |
| ca3      | 0 | 0 | 0 | 0.197 | 0.197 | 0 | 0 | 0 | 0 | 0.197 | 0 | 0 | 0 |
| bsnd     | 0 | 0 | 0 | 0.197 | 0.197 | 0 | 0 | 0 | 0 | 0.197 | 0 | 0 | 0 |
| tmem109  | 0 | 0 | 0 | 0.197 | 0.197 | 0 | 0 | 0 | 0 | 0.197 | 0 | 0 | 0 |
| slc34a2  | 0 | 0 | 0 | 0.197 | 0.197 | 0 | 0 | 0 | 0 | 0.197 | 0 | 0 | 0 |
| slc22a7  | 0 | 0 | 0 | 0.122 | 0.122 | 0 | 0 | 0 | 0 | 0.122 | 0 | 0 | 0 |
| anxa6    | 0 | 0 | 0 | 0.196 | 0.196 | 0 | 0 | 0 | 0 | 0.196 | 0 | 0 | 0 |
| kcnj1    | 0 | 0 | 0 | 0.195 | 0.195 | 0 | 0 | 0 | 0 | 0.195 | 0 | 0 | 0 |
| hspb3    | 0 | 0 | 0 | 0.195 | 0.195 | 0 | 0 | 0 | 0 | 0.195 | 0 | 0 | 0 |
| slc9a8   | 0 | 0 | 0 | 0.195 | 0.195 | 0 | 0 | 0 | 0 | 0.195 | 0 | 0 | 0 |
| fyxd1    | 0 | 0 | 0 | 0.196 | 0.196 | 0 | 0 | 0 | 0 | 0.196 | 0 | 0 | 0 |
| kcnj15   | 0 | 0 | 0 | 0.19  | 0.19  | 0 | 0 | 0 | 0 | 0.19  | 0 | 0 | 0 |
| wnk3     | 0 | 0 | 0 | 0.19  | 0.19  | 0 | 0 | 0 | 0 | 0.19  | 0 | 0 | 0 |
| zc3h12d  | 0 | 0 | 0 | 0.184 | 0.184 | 0 | 0 | 0 | 0 | 0.184 | 0 | 0 | 0 |
| mccc1    | 0 | 0 | 0 | 0.184 | 0.184 | 0 | 0 | 0 | 0 | 0.184 | 0 | 0 | 0 |
| clcnka   | 0 | 0 | 0 | 0.184 | 0.184 | 0 | 0 | 0 | 0 | 0.184 | 0 | 0 | 0 |
| slc12a5  | 0 | 0 | 0 | 0.184 | 0.184 | 0 | 0 | 0 | 0 | 0.184 | 0 | 0 | 0 |
| prh2     | 0 | 0 | 0 | 0.183 | 0.183 | 0 | 0 | 0 | 0 | 0.183 | 0 | 0 | 0 |
| reps1    | 0 | 0 | 0 | 0.183 | 0.183 | 0 | 0 | 0 | 0 | 0.183 | 0 | 0 | 0 |
| slc12a2  | 0 | 0 | 0 | 0.182 | 0.182 | 0 | 0 | 0 | 0 | 0.182 | 0 | 0 | 0 |
| cabp2    | 0 | 0 | 0 | 0.182 | 0.182 | 0 | 0 | 0 | 0 | 0.182 | 0 | 0 | 0 |
| spag1    | 0 | 0 | 0 | 0.182 | 0.182 | 0 | 0 | 0 | 0 | 0.182 | 0 | 0 | 0 |
| acss2    | 0 | 0 | 0 | 0.182 | 0.182 | 0 | 0 | 0 | 0 | 0.182 | 0 | 0 | 0 |
| cyb561a3 | 0 | 0 | 0 | 0.185 | 0.185 | 0 | 0 | 0 | 0 | 0.185 | 0 | 0 | 0 |
| umod     | 0 | 0 | 0 | 0.185 | 0.185 | 0 | 0 | 0 | 0 | 0.185 | 0 | 0 | 0 |
| phex     | 0 | 0 | 0 | 0.187 | 0.187 | 0 | 0 | 0 | 0 | 0.187 | 0 | 0 | 0 |
| xk       | 0 | 0 | 0 | 0.189 | 0.189 | 0 | 0 | 0 | 0 | 0.189 | 0 | 0 | 0 |
| atp1b2   | 0 | 0 | 0 | 0.189 | 0.189 | 0 | 0 | 0 | 0 | 0.189 | 0 | 0 | 0 |
| atp2b3   | 0 | 0 | 0 | 0.19  | 0.19  | 0 | 0 | 0 | 0 | 0.19  | 0 | 0 | 0 |
| slc26a1  | 0 | 0 | 0 | 0.187 | 0.187 | 0 | 0 | 0 | 0 | 0.187 | 0 | 0 | 0 |
| slc4a7   | 0 | 0 | 0 | 0.186 | 0.186 | 0 | 0 | 0 | 0 | 0.186 | 0 | 0 | 0 |
| trpm4    | 0 | 0 | 0 | 0.186 | 0.186 | 0 | 0 | 0 | 0 | 0.186 | 0 | 0 | 0 |
| edf1     | 0 | 0 | 0 | 0.186 | 0.186 | 0 | 0 | 0 | 0 | 0.186 | 0 | 0 | 0 |
| rnase4   | 0 | 0 | 0 | 0.186 | 0.186 | 0 | 0 | 0 | 0 | 0.186 | 0 | 0 | 0 |
| hist1h1t | 0 | 0 | 0 | 0.145 | 0.145 | 0 | 0 | 0 | 0 | 0.145 | 0 | 0 | 0 |
| bw18     | 0 | 0 | 0 | 0.196 | 0.196 | 0 | 0 | 0 | 0 | 0.196 | 0 | 0 | 0 |
| aacs     | 0 | 0 | 0 | 0.127 | 0.127 | 0 | 0 | 0 | 0 | 0.127 | 0 | 0 | 0 |
| slc7a5   | 0 | 0 | 0 | 0.127 | 0.127 | 0 | 0 | 0 | 0 | 0.127 | 0 | 0 | 0 |
| slc7a9   | 0 | 0 | 0 | 0.127 | 0.127 | 0 | 0 | 0 | 0 | 0.127 | 0 | 0 | 0 |
| hpca     | 0 | 0 | 0 | 0.127 | 0.127 | 0 | 0 | 0 | 0 | 0.127 | 0 | 0 | 0 |
| cox4i2   | 0 | 0 | 0 | 0.127 | 0.127 | 0 | 0 | 0 | 0 | 0.127 | 0 | 0 | 0 |

|           |   |   |   |       |       |   |   |   |   |       |   |   |   |
|-----------|---|---|---|-------|-------|---|---|---|---|-------|---|---|---|
| slc19a3   | 0 | 0 | 0 | 0.127 | 0.127 | 0 | 0 | 0 | 0 | 0.127 | 0 | 0 | 0 |
| pdcd7     | 0 | 0 | 0 | 0.127 | 0.127 | 0 | 0 | 0 | 0 | 0.127 | 0 | 0 | 0 |
| mcoln1    | 0 | 0 | 0 | 0.127 | 0.127 | 0 | 0 | 0 | 0 | 0.127 | 0 | 0 | 0 |
| znf354b   | 0 | 0 | 0 | 0.127 | 0.127 | 0 | 0 | 0 | 0 | 0.127 | 0 | 0 | 0 |
| htn3      | 0 | 0 | 0 | 0.127 | 0.127 | 0 | 0 | 0 | 0 | 0.127 | 0 | 0 | 0 |
| aldoa     | 0 | 0 | 0 | 0.127 | 0.127 | 0 | 0 | 0 | 0 | 0.127 | 0 | 0 | 0 |
| cln5      | 0 | 0 | 0 | 0.127 | 0.127 | 0 | 0 | 0 | 0 | 0.127 | 0 | 0 | 0 |
| mon1b     | 0 | 0 | 0 | 0.128 | 0.128 | 0 | 0 | 0 | 0 | 0.128 | 0 | 0 | 0 |
| bckdha    | 0 | 0 | 0 | 0.128 | 0.128 | 0 | 0 | 0 | 0 | 0.128 | 0 | 0 | 0 |
| slc6a1    | 0 | 0 | 0 | 0.128 | 0.128 | 0 | 0 | 0 | 0 | 0.128 | 0 | 0 | 0 |
| pnp       | 0 | 0 | 0 | 0.128 | 0.128 | 0 | 0 | 0 | 0 | 0.128 | 0 | 0 | 0 |
| mgr3      | 0 | 0 | 0 | 0.128 | 0.128 | 0 | 0 | 0 | 0 | 0.128 | 0 | 0 | 0 |
| oxct2     | 0 | 0 | 0 | 0.128 | 0.128 | 0 | 0 | 0 | 0 | 0.128 | 0 | 0 | 0 |
| rnu1-1    | 0 | 0 | 0 | 0.128 | 0.128 | 0 | 0 | 0 | 0 | 0.128 | 0 | 0 | 0 |
| slc4a9    | 0 | 0 | 0 | 0.128 | 0.128 | 0 | 0 | 0 | 0 | 0.128 | 0 | 0 | 0 |
| wnk2      | 0 | 0 | 0 | 0.128 | 0.128 | 0 | 0 | 0 | 0 | 0.128 | 0 | 0 | 0 |
| ptp4a2p2  | 0 | 0 | 0 | 0.128 | 0.128 | 0 | 0 | 0 | 0 | 0.128 | 0 | 0 | 0 |
| rtdr1     | 0 | 0 | 0 | 0.127 | 0.127 | 0 | 0 | 0 | 0 | 0.127 | 0 | 0 | 0 |
| zrsr2     | 0 | 0 | 0 | 0.127 | 0.127 | 0 | 0 | 0 | 0 | 0.127 | 0 | 0 | 0 |
| qsox1     | 0 | 0 | 0 | 0.126 | 0.126 | 0 | 0 | 0 | 0 | 0.126 | 0 | 0 | 0 |
| serinc3   | 0 | 0 | 0 | 0.127 | 0.127 | 0 | 0 | 0 | 0 | 0.127 | 0 | 0 | 0 |
| ckmt1b    | 0 | 0 | 0 | 0.127 | 0.127 | 0 | 0 | 0 | 0 | 0.127 | 0 | 0 | 0 |
| psma5     | 0 | 0 | 0 | 0.127 | 0.127 | 0 | 0 | 0 | 0 | 0.127 | 0 | 0 | 0 |
| spata21   | 0 | 0 | 0 | 0.126 | 0.126 | 0 | 0 | 0 | 0 | 0.126 | 0 | 0 | 0 |
| kcnn2     | 0 | 0 | 0 | 0.126 | 0.126 | 0 | 0 | 0 | 0 | 0.126 | 0 | 0 | 0 |
| spam1     | 0 | 0 | 0 | 0.126 | 0.126 | 0 | 0 | 0 | 0 | 0.126 | 0 | 0 | 0 |
| gng5      | 0 | 0 | 0 | 0.126 | 0.126 | 0 | 0 | 0 | 0 | 0.126 | 0 | 0 | 0 |
| kcnj13    | 0 | 0 | 0 | 0.126 | 0.126 | 0 | 0 | 0 | 0 | 0.126 | 0 | 0 | 0 |
| kcnj12    | 0 | 0 | 0 | 0.126 | 0.126 | 0 | 0 | 0 | 0 | 0.126 | 0 | 0 | 0 |
| rnu6atac  | 0 | 0 | 0 | 0.127 | 0.127 | 0 | 0 | 0 | 0 | 0.127 | 0 | 0 | 0 |
| ppatp1    | 0 | 0 | 0 | 0.127 | 0.127 | 0 | 0 | 0 | 0 | 0.127 | 0 | 0 | 0 |
| defb107a  | 0 | 0 | 0 | 0.127 | 0.127 | 0 | 0 | 0 | 0 | 0.127 | 0 | 0 | 0 |
| tmem176b  | 0 | 0 | 0 | 0.127 | 0.127 | 0 | 0 | 0 | 0 | 0.127 | 0 | 0 | 0 |
| mrs2      | 0 | 0 | 0 | 0.127 | 0.127 | 0 | 0 | 0 | 0 | 0.127 | 0 | 0 | 0 |
| slc22a8   | 0 | 0 | 0 | 0.127 | 0.127 | 0 | 0 | 0 | 0 | 0.127 | 0 | 0 | 0 |
| defb107b  | 0 | 0 | 0 | 0.127 | 0.127 | 0 | 0 | 0 | 0 | 0.127 | 0 | 0 | 0 |
| defb105b  | 0 | 0 | 0 | 0.127 | 0.127 | 0 | 0 | 0 | 0 | 0.127 | 0 | 0 | 0 |
| paicsp2   | 0 | 0 | 0 | 0.127 | 0.127 | 0 | 0 | 0 | 0 | 0.127 | 0 | 0 | 0 |
| paicsp1   | 0 | 0 | 0 | 0.127 | 0.127 | 0 | 0 | 0 | 0 | 0.127 | 0 | 0 | 0 |
| loc285232 | 0 | 0 | 0 | 0.127 | 0.127 | 0 | 0 | 0 | 0 | 0.127 | 0 | 0 | 0 |
| sypl2     | 0 | 0 | 0 | 0.127 | 0.127 | 0 | 0 | 0 | 0 | 0.127 | 0 | 0 | 0 |

|             |   |   |   |       |       |   |   |   |   |       |   |   |   |
|-------------|---|---|---|-------|-------|---|---|---|---|-------|---|---|---|
| tcp10       | 0 | 0 | 0 | 0.128 | 0.128 | 0 | 0 | 0 | 0 | 0.128 | 0 | 0 | 0 |
| galnt3      | 0 | 0 | 0 | 0.128 | 0.128 | 0 | 0 | 0 | 0 | 0.128 | 0 | 0 | 0 |
| bcat1       | 0 | 0 | 0 | 0.13  | 0.13  | 0 | 0 | 0 | 0 | 0.13  | 0 | 0 | 0 |
| slc15a1     | 0 | 0 | 0 | 0.13  | 0.13  | 0 | 0 | 0 | 0 | 0.13  | 0 | 0 | 0 |
| slc10a7     | 0 | 0 | 0 | 0.13  | 0.13  | 0 | 0 | 0 | 0 | 0.13  | 0 | 0 | 0 |
| mfsd11      | 0 | 0 | 0 | 0.13  | 0.13  | 0 | 0 | 0 | 0 | 0.13  | 0 | 0 | 0 |
| prdx5       | 0 | 0 | 0 | 0.13  | 0.13  | 0 | 0 | 0 | 0 | 0.13  | 0 | 0 | 0 |
| pvalb       | 0 | 0 | 0 | 0.13  | 0.13  | 0 | 0 | 0 | 0 | 0.13  | 0 | 0 | 0 |
| rp9         | 0 | 0 | 0 | 0.13  | 0.13  | 0 | 0 | 0 | 0 | 0.13  | 0 | 0 | 0 |
| pygm        | 0 | 0 | 0 | 0.13  | 0.13  | 0 | 0 | 0 | 0 | 0.13  | 0 | 0 | 0 |
| defb125     | 0 | 0 | 0 | 0.13  | 0.13  | 0 | 0 | 0 | 0 | 0.13  | 0 | 0 | 0 |
| atp2a1      | 0 | 0 | 0 | 0.13  | 0.13  | 0 | 0 | 0 | 0 | 0.13  | 0 | 0 | 0 |
| slc15a3     | 0 | 0 | 0 | 0.13  | 0.13  | 0 | 0 | 0 | 0 | 0.13  | 0 | 0 | 0 |
| aebp1       | 0 | 0 | 0 | 0.13  | 0.13  | 0 | 0 | 0 | 0 | 0.13  | 0 | 0 | 0 |
| dhfrp1      | 0 | 0 | 0 | 0.131 | 0.131 | 0 | 0 | 0 | 0 | 0.131 | 0 | 0 | 0 |
| mir4435-1hg | 0 | 0 | 0 | 0.131 | 0.131 | 0 | 0 | 0 | 0 | 0.131 | 0 | 0 | 0 |
| linc00984   | 0 | 0 | 0 | 0.131 | 0.131 | 0 | 0 | 0 | 0 | 0.131 | 0 | 0 | 0 |
| rcvrn       | 0 | 0 | 0 | 0.131 | 0.131 | 0 | 0 | 0 | 0 | 0.131 | 0 | 0 | 0 |
| pnlip       | 0 | 0 | 0 | 0.131 | 0.131 | 0 | 0 | 0 | 0 | 0.131 | 0 | 0 | 0 |
| tfb2m       | 0 | 0 | 0 | 0.131 | 0.131 | 0 | 0 | 0 | 0 | 0.131 | 0 | 0 | 0 |
| c12orf75    | 0 | 0 | 0 | 0.13  | 0.13  | 0 | 0 | 0 | 0 | 0.13  | 0 | 0 | 0 |
| atp6v1g1    | 0 | 0 | 0 | 0.13  | 0.13  | 0 | 0 | 0 | 0 | 0.13  | 0 | 0 | 0 |
| aldh5a1     | 0 | 0 | 0 | 0.13  | 0.13  | 0 | 0 | 0 | 0 | 0.13  | 0 | 0 | 0 |
| pfas        | 0 | 0 | 0 | 0.13  | 0.13  | 0 | 0 | 0 | 0 | 0.13  | 0 | 0 | 0 |
| dupd1       | 0 | 0 | 0 | 0.13  | 0.13  | 0 | 0 | 0 | 0 | 0.13  | 0 | 0 | 0 |
| slc13a4     | 0 | 0 | 0 | 0.13  | 0.13  | 0 | 0 | 0 | 0 | 0.13  | 0 | 0 | 0 |
| agps        | 0 | 0 | 0 | 0.128 | 0.128 | 0 | 0 | 0 | 0 | 0.128 | 0 | 0 | 0 |
| slc26a8     | 0 | 0 | 0 | 0.129 | 0.129 | 0 | 0 | 0 | 0 | 0.129 | 0 | 0 | 0 |
| polr2g      | 0 | 0 | 0 | 0.129 | 0.129 | 0 | 0 | 0 | 0 | 0.129 | 0 | 0 | 0 |
| pkd211      | 0 | 0 | 0 | 0.129 | 0.129 | 0 | 0 | 0 | 0 | 0.129 | 0 | 0 | 0 |
| hmgn2       | 0 | 0 | 0 | 0.128 | 0.128 | 0 | 0 | 0 | 0 | 0.128 | 0 | 0 | 0 |
| atp6v1b2    | 0 | 0 | 0 | 0.128 | 0.128 | 0 | 0 | 0 | 0 | 0.128 | 0 | 0 | 0 |
| tbcel       | 0 | 0 | 0 | 0.128 | 0.128 | 0 | 0 | 0 | 0 | 0.128 | 0 | 0 | 0 |
| guca2a      | 0 | 0 | 0 | 0.128 | 0.128 | 0 | 0 | 0 | 0 | 0.128 | 0 | 0 | 0 |
| ndufa7      | 0 | 0 | 0 | 0.128 | 0.128 | 0 | 0 | 0 | 0 | 0.128 | 0 | 0 | 0 |
| rnu6-2      | 0 | 0 | 0 | 0.128 | 0.128 | 0 | 0 | 0 | 0 | 0.128 | 0 | 0 | 0 |
| agxt        | 0 | 0 | 0 | 0.129 | 0.129 | 0 | 0 | 0 | 0 | 0.129 | 0 | 0 | 0 |
| srsf2       | 0 | 0 | 0 | 0.129 | 0.129 | 0 | 0 | 0 | 0 | 0.129 | 0 | 0 | 0 |
| cnnm3       | 0 | 0 | 0 | 0.13  | 0.13  | 0 | 0 | 0 | 0 | 0.13  | 0 | 0 | 0 |
| camsap1     | 0 | 0 | 0 | 0.13  | 0.13  | 0 | 0 | 0 | 0 | 0.13  | 0 | 0 | 0 |
| med22       | 0 | 0 | 0 | 0.13  | 0.13  | 0 | 0 | 0 | 0 | 0.13  | 0 | 0 | 0 |

|          |   |   |   |       |       |   |   |   |   |       |   |   |   |
|----------|---|---|---|-------|-------|---|---|---|---|-------|---|---|---|
| otos     | 0 | 0 | 0 | 0.13  | 0.13  | 0 | 0 | 0 | 0 | 0.13  | 0 | 0 | 0 |
| pld6     | 0 | 0 | 0 | 0.129 | 0.129 | 0 | 0 | 0 | 0 | 0.129 | 0 | 0 | 0 |
| kcnip1   | 0 | 0 | 0 | 0.129 | 0.129 | 0 | 0 | 0 | 0 | 0.129 | 0 | 0 | 0 |
| dcxr     | 0 | 0 | 0 | 0.129 | 0.129 | 0 | 0 | 0 | 0 | 0.129 | 0 | 0 | 0 |
| slc5a4   | 0 | 0 | 0 | 0.129 | 0.129 | 0 | 0 | 0 | 0 | 0.129 | 0 | 0 | 0 |
| kcnj2    | 0 | 0 | 0 | 0.129 | 0.129 | 0 | 0 | 0 | 0 | 0.129 | 0 | 0 | 0 |
| kcnq2    | 0 | 0 | 0 | 0.129 | 0.129 | 0 | 0 | 0 | 0 | 0.129 | 0 | 0 | 0 |
| slc7a6   | 0 | 0 | 0 | 0.126 | 0.126 | 0 | 0 | 0 | 0 | 0.126 | 0 | 0 | 0 |
| fbxo11   | 0 | 0 | 0 | 0.126 | 0.126 | 0 | 0 | 0 | 0 | 0.126 | 0 | 0 | 0 |
| akr1b1p3 | 0 | 0 | 0 | 0.124 | 0.124 | 0 | 0 | 0 | 0 | 0.124 | 0 | 0 | 0 |
| akr1b1p4 | 0 | 0 | 0 | 0.124 | 0.124 | 0 | 0 | 0 | 0 | 0.124 | 0 | 0 | 0 |
| mtmr2    | 0 | 0 | 0 | 0.124 | 0.124 | 0 | 0 | 0 | 0 | 0.124 | 0 | 0 | 0 |
| catsperg | 0 | 0 | 0 | 0.124 | 0.124 | 0 | 0 | 0 | 0 | 0.124 | 0 | 0 | 0 |
| akr1b1p1 | 0 | 0 | 0 | 0.124 | 0.124 | 0 | 0 | 0 | 0 | 0.124 | 0 | 0 | 0 |
| orai1    | 0 | 0 | 0 | 0.124 | 0.124 | 0 | 0 | 0 | 0 | 0.124 | 0 | 0 | 0 |
| gnpda1   | 0 | 0 | 0 | 0.123 | 0.123 | 0 | 0 | 0 | 0 | 0.123 | 0 | 0 | 0 |
| tvp23a   | 0 | 0 | 0 | 0.123 | 0.123 | 0 | 0 | 0 | 0 | 0.123 | 0 | 0 | 0 |
| tvp23b   | 0 | 0 | 0 | 0.123 | 0.123 | 0 | 0 | 0 | 0 | 0.123 | 0 | 0 | 0 |
| stim1    | 0 | 0 | 0 | 0.123 | 0.123 | 0 | 0 | 0 | 0 | 0.123 | 0 | 0 | 0 |
| znf79    | 0 | 0 | 0 | 0.124 | 0.124 | 0 | 0 | 0 | 0 | 0.124 | 0 | 0 | 0 |
| gspt1    | 0 | 0 | 0 | 0.124 | 0.124 | 0 | 0 | 0 | 0 | 0.124 | 0 | 0 | 0 |
| vn1r2    | 0 | 0 | 0 | 0.124 | 0.124 | 0 | 0 | 0 | 0 | 0.124 | 0 | 0 | 0 |
| vn1r5    | 0 | 0 | 0 | 0.124 | 0.124 | 0 | 0 | 0 | 0 | 0.124 | 0 | 0 | 0 |
| vn1r4    | 0 | 0 | 0 | 0.124 | 0.124 | 0 | 0 | 0 | 0 | 0.124 | 0 | 0 | 0 |
| spin1    | 0 | 0 | 0 | 0.124 | 0.124 | 0 | 0 | 0 | 0 | 0.124 | 0 | 0 | 0 |
| vn1r3    | 0 | 0 | 0 | 0.124 | 0.124 | 0 | 0 | 0 | 0 | 0.124 | 0 | 0 | 0 |
| kcnc2    | 0 | 0 | 0 | 0.124 | 0.124 | 0 | 0 | 0 | 0 | 0.124 | 0 | 0 | 0 |
| alpp     | 0 | 0 | 0 | 0.124 | 0.124 | 0 | 0 | 0 | 0 | 0.124 | 0 | 0 | 0 |
| pgk1p2   | 0 | 0 | 0 | 0.124 | 0.124 | 0 | 0 | 0 | 0 | 0.124 | 0 | 0 | 0 |
| rp24     | 0 | 0 | 0 | 0.124 | 0.124 | 0 | 0 | 0 | 0 | 0.124 | 0 | 0 | 0 |
| pdha2    | 0 | 0 | 0 | 0.124 | 0.124 | 0 | 0 | 0 | 0 | 0.124 | 0 | 0 | 0 |
| hlcs     | 0 | 0 | 0 | 0.123 | 0.123 | 0 | 0 | 0 | 0 | 0.123 | 0 | 0 | 0 |
| c10orf67 | 0 | 0 | 0 | 0.123 | 0.123 | 0 | 0 | 0 | 0 | 0.123 | 0 | 0 | 0 |
| naalad2  | 0 | 0 | 0 | 0.122 | 0.122 | 0 | 0 | 0 | 0 | 0.122 | 0 | 0 | 0 |
| b3gnt1   | 0 | 0 | 0 | 0.123 | 0.123 | 0 | 0 | 0 | 0 | 0.123 | 0 | 0 | 0 |
| atad2b   | 0 | 0 | 0 | 0.123 | 0.123 | 0 | 0 | 0 | 0 | 0.123 | 0 | 0 | 0 |
| isoc1    | 0 | 0 | 0 | 0.123 | 0.123 | 0 | 0 | 0 | 0 | 0.123 | 0 | 0 | 0 |
| naspp1   | 0 | 0 | 0 | 0.122 | 0.122 | 0 | 0 | 0 | 0 | 0.122 | 0 | 0 | 0 |
| slc9a6   | 0 | 0 | 0 | 0.122 | 0.122 | 0 | 0 | 0 | 0 | 0.122 | 0 | 0 | 0 |
| msto1    | 0 | 0 | 0 | 0.122 | 0.122 | 0 | 0 | 0 | 0 | 0.122 | 0 | 0 | 0 |
| oc90     | 0 | 0 | 0 | 0.122 | 0.122 | 0 | 0 | 0 | 0 | 0.122 | 0 | 0 | 0 |

|           |   |   |   |       |       |   |   |   |   |       |   |   |   |
|-----------|---|---|---|-------|-------|---|---|---|---|-------|---|---|---|
| rnu4atac  | 0 | 0 | 0 | 0.122 | 0.122 | 0 | 0 | 0 | 0 | 0.122 | 0 | 0 | 0 |
| fam221b   | 0 | 0 | 0 | 0.122 | 0.122 | 0 | 0 | 0 | 0 | 0.122 | 0 | 0 | 0 |
| obp2b     | 0 | 0 | 0 | 0.123 | 0.123 | 0 | 0 | 0 | 0 | 0.123 | 0 | 0 | 0 |
| grk1      | 0 | 0 | 0 | 0.123 | 0.123 | 0 | 0 | 0 | 0 | 0.123 | 0 | 0 | 0 |
| gpaa1p1   | 0 | 0 | 0 | 0.123 | 0.123 | 0 | 0 | 0 | 0 | 0.123 | 0 | 0 | 0 |
| nek8      | 0 | 0 | 0 | 0.123 | 0.123 | 0 | 0 | 0 | 0 | 0.123 | 0 | 0 | 0 |
| lrrc26    | 0 | 0 | 0 | 0.123 | 0.123 | 0 | 0 | 0 | 0 | 0.123 | 0 | 0 | 0 |
| dsel      | 0 | 0 | 0 | 0.123 | 0.123 | 0 | 0 | 0 | 0 | 0.123 | 0 | 0 | 0 |
| duh       | 0 | 0 | 0 | 0.123 | 0.123 | 0 | 0 | 0 | 0 | 0.123 | 0 | 0 | 0 |
| dnase1l1  | 0 | 0 | 0 | 0.123 | 0.123 | 0 | 0 | 0 | 0 | 0.123 | 0 | 0 | 0 |
| kcnk12    | 0 | 0 | 0 | 0.145 | 0.145 | 0 | 0 | 0 | 0 | 0.145 | 0 | 0 | 0 |
| cdc73     | 0 | 0 | 0 | 0.123 | 0.123 | 0 | 0 | 0 | 0 | 0.123 | 0 | 0 | 0 |
| slc7a13   | 0 | 0 | 0 | 0.123 | 0.123 | 0 | 0 | 0 | 0 | 0.123 | 0 | 0 | 0 |
| dnah2     | 0 | 0 | 0 | 0.123 | 0.123 | 0 | 0 | 0 | 0 | 0.123 | 0 | 0 | 0 |
| lypla1    | 0 | 0 | 0 | 0.124 | 0.124 | 0 | 0 | 0 | 0 | 0.124 | 0 | 0 | 0 |
| slc22a25  | 0 | 0 | 0 | 0.124 | 0.124 | 0 | 0 | 0 | 0 | 0.124 | 0 | 0 | 0 |
| orai3     | 0 | 0 | 0 | 0.125 | 0.125 | 0 | 0 | 0 | 0 | 0.125 | 0 | 0 | 0 |
| btn1a1    | 0 | 0 | 0 | 0.125 | 0.125 | 0 | 0 | 0 | 0 | 0.125 | 0 | 0 | 0 |
| plscr2    | 0 | 0 | 0 | 0.125 | 0.125 | 0 | 0 | 0 | 0 | 0.125 | 0 | 0 | 0 |
| tor1b     | 0 | 0 | 0 | 0.126 | 0.126 | 0 | 0 | 0 | 0 | 0.126 | 0 | 0 | 0 |
| cyp27b1   | 0 | 0 | 0 | 0.125 | 0.125 | 0 | 0 | 0 | 0 | 0.125 | 0 | 0 | 0 |
| pdss2     | 0 | 0 | 0 | 0.125 | 0.125 | 0 | 0 | 0 | 0 | 0.125 | 0 | 0 | 0 |
| barhl1    | 0 | 0 | 0 | 0.125 | 0.125 | 0 | 0 | 0 | 0 | 0.125 | 0 | 0 | 0 |
| prr4      | 0 | 0 | 0 | 0.125 | 0.125 | 0 | 0 | 0 | 0 | 0.125 | 0 | 0 | 0 |
| mocs1     | 0 | 0 | 0 | 0.125 | 0.125 | 0 | 0 | 0 | 0 | 0.125 | 0 | 0 | 0 |
| anxa2p3   | 0 | 0 | 0 | 0.125 | 0.125 | 0 | 0 | 0 | 0 | 0.125 | 0 | 0 | 0 |
| dmrtc1    | 0 | 0 | 0 | 0.126 | 0.126 | 0 | 0 | 0 | 0 | 0.126 | 0 | 0 | 0 |
| mrpl46    | 0 | 0 | 0 | 0.126 | 0.126 | 0 | 0 | 0 | 0 | 0.126 | 0 | 0 | 0 |
| slc22a9   | 0 | 0 | 0 | 0.126 | 0.126 | 0 | 0 | 0 | 0 | 0.126 | 0 | 0 | 0 |
| cela3a    | 0 | 0 | 0 | 0.126 | 0.126 | 0 | 0 | 0 | 0 | 0.126 | 0 | 0 | 0 |
| cacna2d4  | 0 | 0 | 0 | 0.126 | 0.126 | 0 | 0 | 0 | 0 | 0.126 | 0 | 0 | 0 |
| smox      | 0 | 0 | 0 | 0.126 | 0.126 | 0 | 0 | 0 | 0 | 0.126 | 0 | 0 | 0 |
| scel      | 0 | 0 | 0 | 0.126 | 0.126 | 0 | 0 | 0 | 0 | 0.126 | 0 | 0 | 0 |
| dpy19l2p2 | 0 | 0 | 0 | 0.126 | 0.126 | 0 | 0 | 0 | 0 | 0.126 | 0 | 0 | 0 |
| lpin2     | 0 | 0 | 0 | 0.126 | 0.126 | 0 | 0 | 0 | 0 | 0.126 | 0 | 0 | 0 |
| hdgfrp3   | 0 | 0 | 0 | 0.126 | 0.126 | 0 | 0 | 0 | 0 | 0.126 | 0 | 0 | 0 |
| ambp      | 0 | 0 | 0 | 0.126 | 0.126 | 0 | 0 | 0 | 0 | 0.126 | 0 | 0 | 0 |
| dpy19l2p4 | 0 | 0 | 0 | 0.126 | 0.126 | 0 | 0 | 0 | 0 | 0.126 | 0 | 0 | 0 |
| bpifc     | 0 | 0 | 0 | 0.125 | 0.125 | 0 | 0 | 0 | 0 | 0.125 | 0 | 0 | 0 |
| bpifb6    | 0 | 0 | 0 | 0.125 | 0.125 | 0 | 0 | 0 | 0 | 0.125 | 0 | 0 | 0 |
| ccbl2     | 0 | 0 | 0 | 0.124 | 0.124 | 0 | 0 | 0 | 0 | 0.124 | 0 | 0 | 0 |

|          |   |   |   |       |       |   |   |   |   |       |   |   |   |
|----------|---|---|---|-------|-------|---|---|---|---|-------|---|---|---|
| rpe      | 0 | 0 | 0 | 0.124 | 0.124 | 0 | 0 | 0 | 0 | 0.124 | 0 | 0 | 0 |
| slco4c1  | 0 | 0 | 0 | 0.124 | 0.124 | 0 | 0 | 0 | 0 | 0.124 | 0 | 0 | 0 |
| hsf4     | 0 | 0 | 0 | 0.125 | 0.125 | 0 | 0 | 0 | 0 | 0.125 | 0 | 0 | 0 |
| gba3     | 0 | 0 | 0 | 0.124 | 0.124 | 0 | 0 | 0 | 0 | 0.124 | 0 | 0 | 0 |
| ppp1r1a  | 0 | 0 | 0 | 0.124 | 0.124 | 0 | 0 | 0 | 0 | 0.124 | 0 | 0 | 0 |
| mir26a1  | 0 | 0 | 0 | 0.124 | 0.124 | 0 | 0 | 0 | 0 | 0.124 | 0 | 0 | 0 |
| ldha     | 0 | 0 | 0 | 0.124 | 0.124 | 0 | 0 | 0 | 0 | 0.124 | 0 | 0 | 0 |
| slc31a1  | 0 | 0 | 0 | 0.124 | 0.124 | 0 | 0 | 0 | 0 | 0.124 | 0 | 0 | 0 |
| hvcn1    | 0 | 0 | 0 | 0.124 | 0.124 | 0 | 0 | 0 | 0 | 0.124 | 0 | 0 | 0 |
| ppp2r1b  | 0 | 0 | 0 | 0.125 | 0.125 | 0 | 0 | 0 | 0 | 0.125 | 0 | 0 | 0 |
| ift88    | 0 | 0 | 0 | 0.125 | 0.125 | 0 | 0 | 0 | 0 | 0.125 | 0 | 0 | 0 |
| glt1d1   | 0 | 0 | 0 | 0.125 | 0.125 | 0 | 0 | 0 | 0 | 0.125 | 0 | 0 | 0 |
| dhx9p1   | 0 | 0 | 0 | 0.125 | 0.125 | 0 | 0 | 0 | 0 | 0.125 | 0 | 0 | 0 |
| chkb     | 0 | 0 | 0 | 0.125 | 0.125 | 0 | 0 | 0 | 0 | 0.125 | 0 | 0 | 0 |
| tceal8   | 0 | 0 | 0 | 0.125 | 0.125 | 0 | 0 | 0 | 0 | 0.125 | 0 | 0 | 0 |
| dfn6     | 0 | 0 | 0 | 0.125 | 0.125 | 0 | 0 | 0 | 0 | 0.125 | 0 | 0 | 0 |
| pla2g2f  | 0 | 0 | 0 | 0.125 | 0.125 | 0 | 0 | 0 | 0 | 0.125 | 0 | 0 | 0 |
| ldoc1    | 0 | 0 | 0 | 0.125 | 0.125 | 0 | 0 | 0 | 0 | 0.125 | 0 | 0 | 0 |
| entpd8   | 0 | 0 | 0 | 0.125 | 0.125 | 0 | 0 | 0 | 0 | 0.125 | 0 | 0 | 0 |
| bdh1     | 0 | 0 | 0 | 0.125 | 0.125 | 0 | 0 | 0 | 0 | 0.125 | 0 | 0 | 0 |
| slc36a2  | 0 | 0 | 0 | 0.131 | 0.131 | 0 | 0 | 0 | 0 | 0.131 | 0 | 0 | 0 |
| kiaa1244 | 0 | 0 | 0 | 0.125 | 0.125 | 0 | 0 | 0 | 0 | 0.125 | 0 | 0 | 0 |
| mng2     | 0 | 0 | 0 | 0.14  | 0.14  | 0 | 0 | 0 | 0 | 0.14  | 0 | 0 | 0 |
| slc22a20 | 0 | 0 | 0 | 0.14  | 0.14  | 0 | 0 | 0 | 0 | 0.14  | 0 | 0 | 0 |
| ggt5     | 0 | 0 | 0 | 0.14  | 0.14  | 0 | 0 | 0 | 0 | 0.14  | 0 | 0 | 0 |
| snhg16   | 0 | 0 | 0 | 0.14  | 0.14  | 0 | 0 | 0 | 0 | 0.14  | 0 | 0 | 0 |
| eppk1    | 0 | 0 | 0 | 0.14  | 0.14  | 0 | 0 | 0 | 0 | 0.14  | 0 | 0 | 0 |
| aga      | 0 | 0 | 0 | 0.14  | 0.14  | 0 | 0 | 0 | 0 | 0.14  | 0 | 0 | 0 |
| ippk     | 0 | 0 | 0 | 0.139 | 0.139 | 0 | 0 | 0 | 0 | 0.139 | 0 | 0 | 0 |
| fyxd7    | 0 | 0 | 0 | 0.14  | 0.14  | 0 | 0 | 0 | 0 | 0.14  | 0 | 0 | 0 |
| dfna59   | 0 | 0 | 0 | 0.14  | 0.14  | 0 | 0 | 0 | 0 | 0.14  | 0 | 0 | 0 |
| fpgt     | 0 | 0 | 0 | 0.14  | 0.14  | 0 | 0 | 0 | 0 | 0.14  | 0 | 0 | 0 |
| gamt     | 0 | 0 | 0 | 0.14  | 0.14  | 0 | 0 | 0 | 0 | 0.14  | 0 | 0 | 0 |
| slc10a2  | 0 | 0 | 0 | 0.14  | 0.14  | 0 | 0 | 0 | 0 | 0.14  | 0 | 0 | 0 |
| entpd3   | 0 | 0 | 0 | 0.141 | 0.141 | 0 | 0 | 0 | 0 | 0.141 | 0 | 0 | 0 |
| nd6      | 0 | 0 | 0 | 0.141 | 0.141 | 0 | 0 | 0 | 0 | 0.141 | 0 | 0 | 0 |
| srm      | 0 | 0 | 0 | 0.141 | 0.141 | 0 | 0 | 0 | 0 | 0.141 | 0 | 0 | 0 |
| pdzd11   | 0 | 0 | 0 | 0.141 | 0.141 | 0 | 0 | 0 | 0 | 0.141 | 0 | 0 | 0 |
| amdp1    | 0 | 0 | 0 | 0.141 | 0.141 | 0 | 0 | 0 | 0 | 0.141 | 0 | 0 | 0 |
| ipp      | 0 | 0 | 0 | 0.141 | 0.141 | 0 | 0 | 0 | 0 | 0.141 | 0 | 0 | 0 |
| tuba4b   | 0 | 0 | 0 | 0.14  | 0.14  | 0 | 0 | 0 | 0 | 0.14  | 0 | 0 | 0 |

|          |   |   |   |       |       |   |   |   |   |       |   |   |   |
|----------|---|---|---|-------|-------|---|---|---|---|-------|---|---|---|
| bpifa4p  | 0 | 0 | 0 | 0.14  | 0.14  | 0 | 0 | 0 | 0 | 0.14  | 0 | 0 | 0 |
| pth      | 0 | 0 | 0 | 0.141 | 0.141 | 0 | 0 | 0 | 0 | 0.141 | 0 | 0 | 0 |
| mdp1     | 0 | 0 | 0 | 0.141 | 0.141 | 0 | 0 | 0 | 0 | 0.141 | 0 | 0 | 0 |
| dpep1    | 0 | 0 | 0 | 0.139 | 0.139 | 0 | 0 | 0 | 0 | 0.139 | 0 | 0 | 0 |
| caprin2  | 0 | 0 | 0 | 0.139 | 0.139 | 0 | 0 | 0 | 0 | 0.139 | 0 | 0 | 0 |
| cox6b1p1 | 0 | 0 | 0 | 0.138 | 0.138 | 0 | 0 | 0 | 0 | 0.138 | 0 | 0 | 0 |
| mettl7b  | 0 | 0 | 0 | 0.139 | 0.139 | 0 | 0 | 0 | 0 | 0.139 | 0 | 0 | 0 |
| pnpla4   | 0 | 0 | 0 | 0.139 | 0.139 | 0 | 0 | 0 | 0 | 0.139 | 0 | 0 | 0 |
| c2cd2l   | 0 | 0 | 0 | 0.139 | 0.139 | 0 | 0 | 0 | 0 | 0.139 | 0 | 0 | 0 |
| cox6b1p2 | 0 | 0 | 0 | 0.138 | 0.138 | 0 | 0 | 0 | 0 | 0.138 | 0 | 0 | 0 |
| cox6b1p4 | 0 | 0 | 0 | 0.138 | 0.138 | 0 | 0 | 0 | 0 | 0.138 | 0 | 0 | 0 |
| kcna5    | 0 | 0 | 0 | 0.138 | 0.138 | 0 | 0 | 0 | 0 | 0.138 | 0 | 0 | 0 |
| atp6v1c2 | 0 | 0 | 0 | 0.138 | 0.138 | 0 | 0 | 0 | 0 | 0.138 | 0 | 0 | 0 |
| adssl1   | 0 | 0 | 0 | 0.138 | 0.138 | 0 | 0 | 0 | 0 | 0.138 | 0 | 0 | 0 |
| c21orf33 | 0 | 0 | 0 | 0.138 | 0.138 | 0 | 0 | 0 | 0 | 0.138 | 0 | 0 | 0 |
| nagk     | 0 | 0 | 0 | 0.139 | 0.139 | 0 | 0 | 0 | 0 | 0.139 | 0 | 0 | 0 |
| ext3     | 0 | 0 | 0 | 0.139 | 0.139 | 0 | 0 | 0 | 0 | 0.139 | 0 | 0 | 0 |
| hmga1    | 0 | 0 | 0 | 0.139 | 0.139 | 0 | 0 | 0 | 0 | 0.139 | 0 | 0 | 0 |
| atoh7    | 0 | 0 | 0 | 0.139 | 0.139 | 0 | 0 | 0 | 0 | 0.139 | 0 | 0 | 0 |
| ca5ap1   | 0 | 0 | 0 | 0.139 | 0.139 | 0 | 0 | 0 | 0 | 0.139 | 0 | 0 | 0 |
| gca      | 0 | 0 | 0 | 0.139 | 0.139 | 0 | 0 | 0 | 0 | 0.139 | 0 | 0 | 0 |
| slc1a6   | 0 | 0 | 0 | 0.139 | 0.139 | 0 | 0 | 0 | 0 | 0.139 | 0 | 0 | 0 |
| prdm8    | 0 | 0 | 0 | 0.139 | 0.139 | 0 | 0 | 0 | 0 | 0.139 | 0 | 0 | 0 |
| pfdn6    | 0 | 0 | 0 | 0.139 | 0.139 | 0 | 0 | 0 | 0 | 0.139 | 0 | 0 | 0 |
| slc7a8   | 0 | 0 | 0 | 0.139 | 0.139 | 0 | 0 | 0 | 0 | 0.139 | 0 | 0 | 0 |
| cnga4    | 0 | 0 | 0 | 0.139 | 0.139 | 0 | 0 | 0 | 0 | 0.139 | 0 | 0 | 0 |
| kcnk5    | 0 | 0 | 0 | 0.139 | 0.139 | 0 | 0 | 0 | 0 | 0.139 | 0 | 0 | 0 |
| nphs1    | 0 | 0 | 0 | 0.141 | 0.141 | 0 | 0 | 0 | 0 | 0.141 | 0 | 0 | 0 |
| atp4a    | 0 | 0 | 0 | 0.141 | 0.141 | 0 | 0 | 0 | 0 | 0.141 | 0 | 0 | 0 |
| sms      | 0 | 0 | 0 | 0.144 | 0.144 | 0 | 0 | 0 | 0 | 0.144 | 0 | 0 | 0 |
| cbln3    | 0 | 0 | 0 | 0.144 | 0.144 | 0 | 0 | 0 | 0 | 0.144 | 0 | 0 | 0 |
| nav1     | 0 | 0 | 0 | 0.144 | 0.144 | 0 | 0 | 0 | 0 | 0.144 | 0 | 0 | 0 |
| eef1b2p3 | 0 | 0 | 0 | 0.144 | 0.144 | 0 | 0 | 0 | 0 | 0.144 | 0 | 0 | 0 |
| slc1a1   | 0 | 0 | 0 | 0.144 | 0.144 | 0 | 0 | 0 | 0 | 0.144 | 0 | 0 | 0 |
| rnase2   | 0 | 0 | 0 | 0.144 | 0.144 | 0 | 0 | 0 | 0 | 0.144 | 0 | 0 | 0 |
| gng10    | 0 | 0 | 0 | 0.143 | 0.143 | 0 | 0 | 0 | 0 | 0.143 | 0 | 0 | 0 |
| atp2a2   | 0 | 0 | 0 | 0.143 | 0.143 | 0 | 0 | 0 | 0 | 0.143 | 0 | 0 | 0 |
| slc15a2  | 0 | 0 | 0 | 0.143 | 0.143 | 0 | 0 | 0 | 0 | 0.143 | 0 | 0 | 0 |
| slc41a1  | 0 | 0 | 0 | 0.143 | 0.143 | 0 | 0 | 0 | 0 | 0.143 | 0 | 0 | 0 |
| tesc     | 0 | 0 | 0 | 0.144 | 0.144 | 0 | 0 | 0 | 0 | 0.144 | 0 | 0 | 0 |
| rmdn3    | 0 | 0 | 0 | 0.144 | 0.144 | 0 | 0 | 0 | 0 | 0.144 | 0 | 0 | 0 |

|           |   |   |   |       |       |   |   |   |   |       |   |   |   |
|-----------|---|---|---|-------|-------|---|---|---|---|-------|---|---|---|
| clca1     | 0 | 0 | 0 | 0.143 | 0.143 | 0 | 0 | 0 | 0 | 0.143 | 0 | 0 | 0 |
| anxa4     | 0 | 0 | 0 | 0.143 | 0.143 | 0 | 0 | 0 | 0 | 0.143 | 0 | 0 | 0 |
| atp6V0e1  | 0 | 0 | 0 | 0.143 | 0.143 | 0 | 0 | 0 | 0 | 0.143 | 0 | 0 | 0 |
| tnp1      | 0 | 0 | 0 | 0.143 | 0.143 | 0 | 0 | 0 | 0 | 0.143 | 0 | 0 | 0 |
| nudt11    | 0 | 0 | 0 | 0.143 | 0.143 | 0 | 0 | 0 | 0 | 0.143 | 0 | 0 | 0 |
| mir96     | 0 | 0 | 0 | 0.144 | 0.144 | 0 | 0 | 0 | 0 | 0.144 | 0 | 0 | 0 |
| emp3      | 0 | 0 | 0 | 0.144 | 0.144 | 0 | 0 | 0 | 0 | 0.144 | 0 | 0 | 0 |
| lrrc23    | 0 | 0 | 0 | 0.143 | 0.143 | 0 | 0 | 0 | 0 | 0.143 | 0 | 0 | 0 |
| calb1     | 0 | 0 | 0 | 0.144 | 0.144 | 0 | 0 | 0 | 0 | 0.144 | 0 | 0 | 0 |
| slc6a17   | 0 | 0 | 0 | 0.131 | 0.131 | 0 | 0 | 0 | 0 | 0.131 | 0 | 0 | 0 |
| atp1b4    | 0 | 0 | 0 | 0.143 | 0.143 | 0 | 0 | 0 | 0 | 0.143 | 0 | 0 | 0 |
| tmed2     | 0 | 0 | 0 | 0.143 | 0.143 | 0 | 0 | 0 | 0 | 0.143 | 0 | 0 | 0 |
| slc16a6   | 0 | 0 | 0 | 0.142 | 0.142 | 0 | 0 | 0 | 0 | 0.142 | 0 | 0 | 0 |
| odcp      | 0 | 0 | 0 | 0.142 | 0.142 | 0 | 0 | 0 | 0 | 0.142 | 0 | 0 | 0 |
| slc9a1    | 0 | 0 | 0 | 0.142 | 0.142 | 0 | 0 | 0 | 0 | 0.142 | 0 | 0 | 0 |
| aldh4a1   | 0 | 0 | 0 | 0.142 | 0.142 | 0 | 0 | 0 | 0 | 0.142 | 0 | 0 | 0 |
| gsm1      | 0 | 0 | 0 | 0.142 | 0.142 | 0 | 0 | 0 | 0 | 0.142 | 0 | 0 | 0 |
| msrb1     | 0 | 0 | 0 | 0.142 | 0.142 | 0 | 0 | 0 | 0 | 0.142 | 0 | 0 | 0 |
| rwdd2b    | 0 | 0 | 0 | 0.141 | 0.141 | 0 | 0 | 0 | 0 | 0.141 | 0 | 0 | 0 |
| ca2       | 0 | 0 | 0 | 0.141 | 0.141 | 0 | 0 | 0 | 0 | 0.141 | 0 | 0 | 0 |
| mmvp2     | 0 | 0 | 0 | 0.141 | 0.141 | 0 | 0 | 0 | 0 | 0.141 | 0 | 0 | 0 |
| krt12     | 0 | 0 | 0 | 0.141 | 0.141 | 0 | 0 | 0 | 0 | 0.141 | 0 | 0 | 0 |
| slc6a6    | 0 | 0 | 0 | 0.142 | 0.142 | 0 | 0 | 0 | 0 | 0.142 | 0 | 0 | 0 |
| tectb     | 0 | 0 | 0 | 0.142 | 0.142 | 0 | 0 | 0 | 0 | 0.142 | 0 | 0 | 0 |
| slc9b2    | 0 | 0 | 0 | 0.143 | 0.143 | 0 | 0 | 0 | 0 | 0.143 | 0 | 0 | 0 |
| trpc1     | 0 | 0 | 0 | 0.143 | 0.143 | 0 | 0 | 0 | 0 | 0.143 | 0 | 0 | 0 |
| vdac1p5   | 0 | 0 | 0 | 0.143 | 0.143 | 0 | 0 | 0 | 0 | 0.143 | 0 | 0 | 0 |
| vdac1p4   | 0 | 0 | 0 | 0.143 | 0.143 | 0 | 0 | 0 | 0 | 0.143 | 0 | 0 | 0 |
| atp4b     | 0 | 0 | 0 | 0.142 | 0.142 | 0 | 0 | 0 | 0 | 0.142 | 0 | 0 | 0 |
| tmem59l   | 0 | 0 | 0 | 0.142 | 0.142 | 0 | 0 | 0 | 0 | 0.142 | 0 | 0 | 0 |
| atp6v1a   | 0 | 0 | 0 | 0.142 | 0.142 | 0 | 0 | 0 | 0 | 0.142 | 0 | 0 | 0 |
| gja10     | 0 | 0 | 0 | 0.142 | 0.142 | 0 | 0 | 0 | 0 | 0.142 | 0 | 0 | 0 |
| slc14a2   | 0 | 0 | 0 | 0.142 | 0.142 | 0 | 0 | 0 | 0 | 0.142 | 0 | 0 | 0 |
| gldc      | 0 | 0 | 0 | 0.138 | 0.138 | 0 | 0 | 0 | 0 | 0.138 | 0 | 0 | 0 |
| loc390998 | 0 | 0 | 0 | 0.14  | 0.14  | 0 | 0 | 0 | 0 | 0.14  | 0 | 0 | 0 |
| espn      | 0 | 0 | 0 | 0.133 | 0.133 | 0 | 0 | 0 | 0 | 0.133 | 0 | 0 | 0 |
| tpkb      | 0 | 0 | 0 | 0.133 | 0.133 | 0 | 0 | 0 | 0 | 0.133 | 0 | 0 | 0 |
| bzrap1    | 0 | 0 | 0 | 0.133 | 0.133 | 0 | 0 | 0 | 0 | 0.133 | 0 | 0 | 0 |
| prmt7     | 0 | 0 | 0 | 0.134 | 0.134 | 0 | 0 | 0 | 0 | 0.134 | 0 | 0 | 0 |
| galk1     | 0 | 0 | 0 | 0.133 | 0.133 | 0 | 0 | 0 | 0 | 0.133 | 0 | 0 | 0 |
| slc6a5    | 0 | 0 | 0 | 0.133 | 0.133 | 0 | 0 | 0 | 0 | 0.133 | 0 | 0 | 0 |

|           |   |   |   |       |       |   |   |   |   |       |   |   |   |
|-----------|---|---|---|-------|-------|---|---|---|---|-------|---|---|---|
| nudt9     | 0 | 0 | 0 | 0.133 | 0.133 | 0 | 0 | 0 | 0 | 0.133 | 0 | 0 | 0 |
| usf1      | 0 | 0 | 0 | 0.133 | 0.133 | 0 | 0 | 0 | 0 | 0.133 | 0 | 0 | 0 |
| extl2     | 0 | 0 | 0 | 0.133 | 0.133 | 0 | 0 | 0 | 0 | 0.133 | 0 | 0 | 0 |
| glud1p3   | 0 | 0 | 0 | 0.133 | 0.133 | 0 | 0 | 0 | 0 | 0.133 | 0 | 0 | 0 |
| sord      | 0 | 0 | 0 | 0.134 | 0.134 | 0 | 0 | 0 | 0 | 0.134 | 0 | 0 | 0 |
| slc24a3   | 0 | 0 | 0 | 0.134 | 0.134 | 0 | 0 | 0 | 0 | 0.134 | 0 | 0 | 0 |
| spns3     | 0 | 0 | 0 | 0.134 | 0.134 | 0 | 0 | 0 | 0 | 0.134 | 0 | 0 | 0 |
| svopl     | 0 | 0 | 0 | 0.134 | 0.134 | 0 | 0 | 0 | 0 | 0.134 | 0 | 0 | 0 |
| linc00470 | 0 | 0 | 0 | 0.135 | 0.135 | 0 | 0 | 0 | 0 | 0.135 | 0 | 0 | 0 |
| pgm2l1    | 0 | 0 | 0 | 0.135 | 0.135 | 0 | 0 | 0 | 0 | 0.135 | 0 | 0 | 0 |
| fabp6     | 0 | 0 | 0 | 0.134 | 0.134 | 0 | 0 | 0 | 0 | 0.134 | 0 | 0 | 0 |
| glt8d2    | 0 | 0 | 0 | 0.134 | 0.134 | 0 | 0 | 0 | 0 | 0.134 | 0 | 0 | 0 |
| ak1       | 0 | 0 | 0 | 0.134 | 0.134 | 0 | 0 | 0 | 0 | 0.134 | 0 | 0 | 0 |
| hs3st3a1  | 0 | 0 | 0 | 0.134 | 0.134 | 0 | 0 | 0 | 0 | 0.134 | 0 | 0 | 0 |
| sczd11    | 0 | 0 | 0 | 0.134 | 0.134 | 0 | 0 | 0 | 0 | 0.134 | 0 | 0 | 0 |
| nudt21    | 0 | 0 | 0 | 0.134 | 0.134 | 0 | 0 | 0 | 0 | 0.134 | 0 | 0 | 0 |
| barhl2    | 0 | 0 | 0 | 0.132 | 0.132 | 0 | 0 | 0 | 0 | 0.132 | 0 | 0 | 0 |
| hspb1p2   | 0 | 0 | 0 | 0.132 | 0.132 | 0 | 0 | 0 | 0 | 0.132 | 0 | 0 | 0 |
| trpc2     | 0 | 0 | 0 | 0.131 | 0.131 | 0 | 0 | 0 | 0 | 0.131 | 0 | 0 | 0 |
| glud1p4   | 0 | 0 | 0 | 0.131 | 0.131 | 0 | 0 | 0 | 0 | 0.131 | 0 | 0 | 0 |
| jph1      | 0 | 0 | 0 | 0.131 | 0.131 | 0 | 0 | 0 | 0 | 0.131 | 0 | 0 | 0 |
| brms1     | 0 | 0 | 0 | 0.131 | 0.131 | 0 | 0 | 0 | 0 | 0.131 | 0 | 0 | 0 |
| hagh      | 0 | 0 | 0 | 0.131 | 0.131 | 0 | 0 | 0 | 0 | 0.131 | 0 | 0 | 0 |
| cnm1      | 0 | 0 | 0 | 0.131 | 0.131 | 0 | 0 | 0 | 0 | 0.131 | 0 | 0 | 0 |
| pde7a     | 0 | 0 | 0 | 0.131 | 0.131 | 0 | 0 | 0 | 0 | 0.131 | 0 | 0 | 0 |
| cbx2      | 0 | 0 | 0 | 0.131 | 0.131 | 0 | 0 | 0 | 0 | 0.131 | 0 | 0 | 0 |
| gapdh     | 0 | 0 | 0 | 0.131 | 0.131 | 0 | 0 | 0 | 0 | 0.131 | 0 | 0 | 0 |
| cln3      | 0 | 0 | 0 | 0.131 | 0.131 | 0 | 0 | 0 | 0 | 0.131 | 0 | 0 | 0 |
| sat1      | 0 | 0 | 0 | 0.131 | 0.131 | 0 | 0 | 0 | 0 | 0.131 | 0 | 0 | 0 |
| proa      | 0 | 0 | 0 | 0.131 | 0.131 | 0 | 0 | 0 | 0 | 0.131 | 0 | 0 | 0 |
| hvp6ai1   | 0 | 0 | 0 | 0.132 | 0.132 | 0 | 0 | 0 | 0 | 0.132 | 0 | 0 | 0 |
| otc       | 0 | 0 | 0 | 0.132 | 0.132 | 0 | 0 | 0 | 0 | 0.132 | 0 | 0 | 0 |
| kcna10    | 0 | 0 | 0 | 0.132 | 0.132 | 0 | 0 | 0 | 0 | 0.132 | 0 | 0 | 0 |
| kcnj4     | 0 | 0 | 0 | 0.132 | 0.132 | 0 | 0 | 0 | 0 | 0.132 | 0 | 0 | 0 |
| pax2      | 0 | 0 | 0 | 0.138 | 0.138 | 0 | 0 | 0 | 0 | 0.138 | 0 | 0 | 0 |
| ofd1p17   | 0 | 0 | 0 | 0.132 | 0.132 | 0 | 0 | 0 | 0 | 0.132 | 0 | 0 | 0 |
| mopcb1    | 0 | 0 | 0 | 0.132 | 0.132 | 0 | 0 | 0 | 0 | 0.132 | 0 | 0 | 0 |
| calml5    | 0 | 0 | 0 | 0.132 | 0.132 | 0 | 0 | 0 | 0 | 0.132 | 0 | 0 | 0 |
| kcnc1     | 0 | 0 | 0 | 0.132 | 0.132 | 0 | 0 | 0 | 0 | 0.132 | 0 | 0 | 0 |
| ofd1p18y  | 0 | 0 | 0 | 0.132 | 0.132 | 0 | 0 | 0 | 0 | 0.132 | 0 | 0 | 0 |
| prkcg     | 0 | 0 | 0 | 0.135 | 0.135 | 0 | 0 | 0 | 0 | 0.135 | 0 | 0 | 0 |

|              |   |   |   |       |       |   |   |   |   |       |   |   |   |
|--------------|---|---|---|-------|-------|---|---|---|---|-------|---|---|---|
| rnase1       | 0 | 0 | 0 | 0.132 | 0.132 | 0 | 0 | 0 | 0 | 0.132 | 0 | 0 | 0 |
| oaz2         | 0 | 0 | 0 | 0.138 | 0.138 | 0 | 0 | 0 | 0 | 0.138 | 0 | 0 | 0 |
| mctp1        | 0 | 0 | 0 | 0.137 | 0.137 | 0 | 0 | 0 | 0 | 0.137 | 0 | 0 | 0 |
| skcg-1       | 0 | 0 | 0 | 0.137 | 0.137 | 0 | 0 | 0 | 0 | 0.137 | 0 | 0 | 0 |
| oma1         | 0 | 0 | 0 | 0.138 | 0.138 | 0 | 0 | 0 | 0 | 0.138 | 0 | 0 | 0 |
| dyt15        | 0 | 0 | 0 | 0.137 | 0.137 | 0 | 0 | 0 | 0 | 0.137 | 0 | 0 | 0 |
| aadat        | 0 | 0 | 0 | 0.137 | 0.137 | 0 | 0 | 0 | 0 | 0.137 | 0 | 0 | 0 |
| ndufa4       | 0 | 0 | 0 | 0.138 | 0.138 | 0 | 0 | 0 | 0 | 0.138 | 0 | 0 | 0 |
| gfpt1        | 0 | 0 | 0 | 0.136 | 0.136 | 0 | 0 | 0 | 0 | 0.136 | 0 | 0 | 0 |
| bw37         | 0 | 0 | 0 | 0.136 | 0.136 | 0 | 0 | 0 | 0 | 0.136 | 0 | 0 | 0 |
| gabrr1       | 0 | 0 | 0 | 0.136 | 0.136 | 0 | 0 | 0 | 0 | 0.136 | 0 | 0 | 0 |
| aim1         | 0 | 0 | 0 | 0.137 | 0.137 | 0 | 0 | 0 | 0 | 0.137 | 0 | 0 | 0 |
| ccdc114      | 0 | 0 | 0 | 0.137 | 0.137 | 0 | 0 | 0 | 0 | 0.137 | 0 | 0 | 0 |
| anxa3        | 0 | 0 | 0 | 0.137 | 0.137 | 0 | 0 | 0 | 0 | 0.137 | 0 | 0 | 0 |
| sds          | 0 | 0 | 0 | 0.137 | 0.137 | 0 | 0 | 0 | 0 | 0.137 | 0 | 0 | 0 |
| prdx6        | 0 | 0 | 0 | 0.137 | 0.137 | 0 | 0 | 0 | 0 | 0.137 | 0 | 0 | 0 |
| hnrnpdl      | 0 | 0 | 0 | 0.137 | 0.137 | 0 | 0 | 0 | 0 | 0.137 | 0 | 0 | 0 |
| thoc7        | 0 | 0 | 0 | 0.137 | 0.137 | 0 | 0 | 0 | 0 | 0.137 | 0 | 0 | 0 |
| cpxm2        | 0 | 0 | 0 | 0.137 | 0.137 | 0 | 0 | 0 | 0 | 0.137 | 0 | 0 | 0 |
| usp51        | 0 | 0 | 0 | 0.138 | 0.138 | 0 | 0 | 0 | 0 | 0.138 | 0 | 0 | 0 |
| glulp1       | 0 | 0 | 0 | 0.135 | 0.135 | 0 | 0 | 0 | 0 | 0.135 | 0 | 0 | 0 |
| slc5a1       | 0 | 0 | 0 | 0.137 | 0.137 | 0 | 0 | 0 | 0 | 0.137 | 0 | 0 | 0 |
| loc100093631 | 0 | 0 | 0 | 0.136 | 0.136 | 0 | 0 | 0 | 0 | 0.136 | 0 | 0 | 0 |
| gtf2ip1      | 0 | 0 | 0 | 0.136 | 0.136 | 0 | 0 | 0 | 0 | 0.136 | 0 | 0 | 0 |
| slc16a8      | 0 | 0 | 0 | 0.135 | 0.135 | 0 | 0 | 0 | 0 | 0.135 | 0 | 0 | 0 |
| atp6v0b      | 0 | 0 | 0 | 0.135 | 0.135 | 0 | 0 | 0 | 0 | 0.135 | 0 | 0 | 0 |
| acads        | 0 | 0 | 0 | 0.135 | 0.135 | 0 | 0 | 0 | 0 | 0.135 | 0 | 0 | 0 |
| hmgcl        | 0 | 0 | 0 | 0.135 | 0.135 | 0 | 0 | 0 | 0 | 0.135 | 0 | 0 | 0 |
| kcnb2        | 0 | 0 | 0 | 0.135 | 0.135 | 0 | 0 | 0 | 0 | 0.135 | 0 | 0 | 0 |
| sca25        | 0 | 0 | 0 | 0.135 | 0.135 | 0 | 0 | 0 | 0 | 0.135 | 0 | 0 | 0 |
| glulp2       | 0 | 0 | 0 | 0.135 | 0.135 | 0 | 0 | 0 | 0 | 0.135 | 0 | 0 | 0 |
| glulp3       | 0 | 0 | 0 | 0.135 | 0.135 | 0 | 0 | 0 | 0 | 0.135 | 0 | 0 | 0 |
| glulp4       | 0 | 0 | 0 | 0.135 | 0.135 | 0 | 0 | 0 | 0 | 0.135 | 0 | 0 | 0 |
| surf6        | 0 | 0 | 0 | 0.135 | 0.135 | 0 | 0 | 0 | 0 | 0.135 | 0 | 0 | 0 |
| pawr         | 0 | 0 | 0 | 0.135 | 0.135 | 0 | 0 | 0 | 0 | 0.135 | 0 | 0 | 0 |
| amelx        | 0 | 0 | 0 | 0.135 | 0.135 | 0 | 0 | 0 | 0 | 0.135 | 0 | 0 | 0 |
| slc25a18     | 0 | 0 | 0 | 0.136 | 0.136 | 0 | 0 | 0 | 0 | 0.136 | 0 | 0 | 0 |
| ptbp3        | 0 | 0 | 0 | 0.136 | 0.136 | 0 | 0 | 0 | 0 | 0.136 | 0 | 0 | 0 |
| gdpd5        | 0 | 0 | 0 | 0.136 | 0.136 | 0 | 0 | 0 | 0 | 0.136 | 0 | 0 | 0 |
| slc16a10     | 0 | 0 | 0 | 0.136 | 0.136 | 0 | 0 | 0 | 0 | 0.136 | 0 | 0 | 0 |
| entpd2       | 0 | 0 | 0 | 0.136 | 0.136 | 0 | 0 | 0 | 0 | 0.136 | 0 | 0 | 0 |

|          |   |   |       |       |       |       |   |   |       |       |       |       |       |
|----------|---|---|-------|-------|-------|-------|---|---|-------|-------|-------|-------|-------|
| loc2748  | 0 | 0 | 0     | 0.136 | 0.136 | 0     | 0 | 0 | 0     | 0.136 | 0     | 0     | 0     |
| chp2     | 0 | 0 | 0     | 0.137 | 0.137 | 0     | 0 | 0 | 0     | 0.137 | 0     | 0     | 0     |
| glud1p2  | 0 | 0 | 0     | 0.136 | 0.136 | 0     | 0 | 0 | 0     | 0.136 | 0     | 0     | 0     |
| hist1h1e | 0 | 0 | 0     | 0.136 | 0.136 | 0     | 0 | 0 | 0     | 0.136 | 0     | 0     | 0     |
| hist1h1d | 0 | 0 | 0     | 0.136 | 0.136 | 0     | 0 | 0 | 0     | 0.136 | 0     | 0     | 0     |
| begain   | 0 | 0 | 0     | 0     | 0     | 0     | 0 | 0 | 0.102 | 0     | 0.106 | 0.105 | 0     |
| cntnap4  | 0 | 0 | 0     | 0     | 0     | 0     | 0 | 0 | 0.104 | 0     | 0.102 | 0.102 | 0     |
| stx8     | 0 | 0 | 0     | 0     | 0     | 0     | 0 | 0 | 0.103 | 0     | 0.119 | 0.118 | 0     |
| izumo1   | 0 | 0 | 0     | 0     | 0     | 0     | 0 | 0 | 0.101 | 0     | 0.132 | 0.132 | 0     |
| atp6v1h  | 0 | 0 | 0     | 0     | 0     | 0     | 0 | 0 | 0.1   | 0     | 0.12  | 0.119 | 0     |
| mapk4    | 0 | 0 | 0     | 0     | 0     | 0     | 0 | 0 | 0     | 0     | 0.12  | 0.119 | 0.101 |
| mxr17    | 0 | 0 | 0     | 0     | 0     | 0     | 0 | 0 | 0     | 0     | 0.146 | 0.146 | 0.1   |
| mmp23a   | 0 | 0 | 0     | 0     | 0     | 0     | 0 | 0 | 0     | 0     | 0.101 | 0.101 | 0.101 |
| mxr18    | 0 | 0 | 0     | 0     | 0     | 0     | 0 | 0 | 0     | 0     | 0.146 | 0.146 | 0.1   |
| caskin2  | 0 | 0 | 0     | 0     | 0     | 0     | 0 | 0 | 0.104 | 0     | 0     | 0     | 0.104 |
| rap1ap   | 0 | 0 | 0     | 0     | 0     | 0     | 0 | 0 | 0.105 | 0     | 0     | 0     | 0.113 |
| rep15    | 0 | 0 | 0     | 0     | 0     | 0     | 0 | 0 | 0.1   | 0     | 0     | 0     | 0.119 |
| nphp4    | 0 | 0 | 0     | 0     | 0     | 0     | 0 | 0 | 0.103 | 0     | 0     | 0     | 0.104 |
| mir196a1 | 0 | 0 | 0.203 | 0     | 0     | 0.203 | 0 | 0 | 0     | 0     | 0     | 0     | 0     |
| znf510   | 0 | 0 | 0.204 | 0     | 0     | 0.204 | 0 | 0 | 0     | 0     | 0     | 0     | 0     |
| iddm3    | 0 | 0 | 0.204 | 0     | 0     | 0.204 | 0 | 0 | 0     | 0     | 0     | 0     | 0     |
| htr1e    | 0 | 0 | 0.215 | 0     | 0     | 0.215 | 0 | 0 | 0     | 0     | 0     | 0     | 0     |
| mir122   | 0 | 0 | 0.22  | 0     | 0     | 0.22  | 0 | 0 | 0     | 0     | 0     | 0     | 0     |
| moxd1    | 0 | 0 | 0.221 | 0     | 0     | 0.221 | 0 | 0 | 0     | 0     | 0     | 0     | 0     |
| tor2a    | 0 | 0 | 0.217 | 0     | 0     | 0.217 | 0 | 0 | 0     | 0     | 0     | 0     | 0     |
| tmbim6   | 0 | 0 | 0.179 | 0     | 0     | 0.179 | 0 | 0 | 0     | 0     | 0     | 0     | 0     |
| crip2    | 0 | 0 | 0.201 | 0     | 0     | 0.201 | 0 | 0 | 0     | 0     | 0     | 0     | 0     |
| alas1    | 0 | 0 | 0.216 | 0     | 0     | 0.216 | 0 | 0 | 0     | 0     | 0     | 0     | 0     |
| pradc1   | 0 | 0 | 0.21  | 0     | 0     | 0.21  | 0 | 0 | 0     | 0     | 0     | 0     | 0     |
| brd9     | 0 | 0 | 0.195 | 0     | 0     | 0.195 | 0 | 0 | 0     | 0     | 0     | 0     | 0     |
| alkbh3   | 0 | 0 | 0.186 | 0     | 0     | 0.186 | 0 | 0 | 0     | 0     | 0     | 0     | 0     |
| slc18a2  | 0 | 0 | 0.188 | 0     | 0     | 0.188 | 0 | 0 | 0     | 0     | 0     | 0     | 0     |
| megf11   | 0 | 0 | 0.184 | 0     | 0     | 0.184 | 0 | 0 | 0     | 0     | 0     | 0     | 0     |
| agbl3    | 0 | 0 | 0.181 | 0     | 0     | 0.181 | 0 | 0 | 0     | 0     | 0     | 0     | 0     |
| gstk1    | 0 | 0 | 0.18  | 0     | 0     | 0.18  | 0 | 0 | 0     | 0     | 0     | 0     | 0     |
| qdpr     | 0 | 0 | 0.189 | 0     | 0     | 0.189 | 0 | 0 | 0     | 0     | 0     | 0     | 0     |
| gucy1b2  | 0 | 0 | 0.189 | 0     | 0     | 0.189 | 0 | 0 | 0     | 0     | 0     | 0     | 0     |
| osgin1   | 0 | 0 | 0.195 | 0     | 0     | 0.195 | 0 | 0 | 0     | 0     | 0     | 0     | 0     |
| slc18a1  | 0 | 0 | 0.197 | 0     | 0     | 0.197 | 0 | 0 | 0     | 0     | 0     | 0     | 0     |
| rassf7   | 0 | 0 | 0.227 | 0     | 0     | 0.227 | 0 | 0 | 0     | 0     | 0     | 0     | 0     |
| phox2a   | 0 | 0 | 0.195 | 0     | 0     | 0.195 | 0 | 0 | 0     | 0     | 0     | 0     | 0     |

|           |   |   |       |   |   |       |   |   |   |   |   |   |   |
|-----------|---|---|-------|---|---|-------|---|---|---|---|---|---|---|
| znf24     | 0 | 0 | 0.194 | 0 | 0 | 0.194 | 0 | 0 | 0 | 0 | 0 | 0 | 0 |
| dpf3      | 0 | 0 | 0.2   | 0 | 0 | 0.2   | 0 | 0 | 0 | 0 | 0 | 0 | 0 |
| pnmt      | 0 | 0 | 0.365 | 0 | 0 | 0.365 | 0 | 0 | 0 | 0 | 0 | 0 | 0 |
| fuom      | 0 | 0 | 0.345 | 0 | 0 | 0.345 | 0 | 0 | 0 | 0 | 0 | 0 | 0 |
| lix1      | 0 | 0 | 0.35  | 0 | 0 | 0.35  | 0 | 0 | 0 | 0 | 0 | 0 | 0 |
| hmox2     | 0 | 0 | 0.343 | 0 | 0 | 0.343 | 0 | 0 | 0 | 0 | 0 | 0 | 0 |
| dmrta2    | 0 | 0 | 0.343 | 0 | 0 | 0.343 | 0 | 0 | 0 | 0 | 0 | 0 | 0 |
| bcas3     | 0 | 0 | 0.338 | 0 | 0 | 0.338 | 0 | 0 | 0 | 0 | 0 | 0 | 0 |
| bach1     | 0 | 0 | 0.34  | 0 | 0 | 0.34  | 0 | 0 | 0 | 0 | 0 | 0 | 0 |
| znf782    | 0 | 0 | 0.351 | 0 | 0 | 0.351 | 0 | 0 | 0 | 0 | 0 | 0 | 0 |
| blvrb     | 0 | 0 | 0.352 | 0 | 0 | 0.352 | 0 | 0 | 0 | 0 | 0 | 0 | 0 |
| gchfr     | 0 | 0 | 0.412 | 0 | 0 | 0.412 | 0 | 0 | 0 | 0 | 0 | 0 | 0 |
| fzd9      | 0 | 0 | 0.179 | 0 | 0 | 0.179 | 0 | 0 | 0 | 0 | 0 | 0 | 0 |
| hmox1     | 0 | 0 | 0.405 | 0 | 0 | 0.405 | 0 | 0 | 0 | 0 | 0 | 0 | 0 |
| th        | 0 | 0 | 0.403 | 0 | 0 | 0.403 | 0 | 0 | 0 | 0 | 0 | 0 | 0 |
| spr       | 0 | 0 | 0.367 | 0 | 0 | 0.367 | 0 | 0 | 0 | 0 | 0 | 0 | 0 |
| ddc       | 0 | 0 | 0.395 | 0 | 0 | 0.395 | 0 | 0 | 0 | 0 | 0 | 0 | 0 |
| gch1      | 0 | 0 | 0.338 | 0 | 0 | 0.338 | 0 | 0 | 0 | 0 | 0 | 0 | 0 |
| dbh       | 0 | 0 | 0.321 | 0 | 0 | 0.321 | 0 | 0 | 0 | 0 | 0 | 0 | 0 |
| znf124    | 0 | 0 | 0.259 | 0 | 0 | 0.259 | 0 | 0 | 0 | 0 | 0 | 0 | 0 |
| fgf20     | 0 | 0 | 0.265 | 0 | 0 | 0.265 | 0 | 0 | 0 | 0 | 0 | 0 | 0 |
| kiaa2022  | 0 | 0 | 0.247 | 0 | 0 | 0.247 | 0 | 0 | 0 | 0 | 0 | 0 | 0 |
| nr4a2     | 0 | 0 | 0.243 | 0 | 0 | 0.243 | 0 | 0 | 0 | 0 | 0 | 0 | 0 |
| pitx3     | 0 | 0 | 0.241 | 0 | 0 | 0.241 | 0 | 0 | 0 | 0 | 0 | 0 | 0 |
| sall3     | 0 | 0 | 0.243 | 0 | 0 | 0.243 | 0 | 0 | 0 | 0 | 0 | 0 | 0 |
| ankrd37   | 0 | 0 | 0.265 | 0 | 0 | 0.265 | 0 | 0 | 0 | 0 | 0 | 0 | 0 |
| slitrk1   | 0 | 0 | 0.266 | 0 | 0 | 0.266 | 0 | 0 | 0 | 0 | 0 | 0 | 0 |
| trnf      | 0 | 0 | 0.306 | 0 | 0 | 0.306 | 0 | 0 | 0 | 0 | 0 | 0 | 0 |
| slc25a28  | 0 | 0 | 0.312 | 0 | 0 | 0.312 | 0 | 0 | 0 | 0 | 0 | 0 | 0 |
| pts       | 0 | 0 | 0.301 | 0 | 0 | 0.301 | 0 | 0 | 0 | 0 | 0 | 0 | 0 |
| blvra     | 0 | 0 | 0.3   | 0 | 0 | 0.3   | 0 | 0 | 0 | 0 | 0 | 0 | 0 |
| enox1     | 0 | 0 | 0.272 | 0 | 0 | 0.272 | 0 | 0 | 0 | 0 | 0 | 0 | 0 |
| mrpl3     | 0 | 0 | 0.24  | 0 | 0 | 0.24  | 0 | 0 | 0 | 0 | 0 | 0 | 0 |
| auts5     | 0 | 0 | 0.12  | 0 | 0 | 0.12  | 0 | 0 | 0 | 0 | 0 | 0 | 0 |
| miox      | 0 | 0 | 0.11  | 0 | 0 | 0.11  | 0 | 0 | 0 | 0 | 0 | 0 | 0 |
| naa20     | 0 | 0 | 0.113 | 0 | 0 | 0.113 | 0 | 0 | 0 | 0 | 0 | 0 | 0 |
| loc642502 | 0 | 0 | 0.115 | 0 | 0 | 0.115 | 0 | 0 | 0 | 0 | 0 | 0 | 0 |
| alad      | 0 | 0 | 0.115 | 0 | 0 | 0.115 | 0 | 0 | 0 | 0 | 0 | 0 | 0 |
| pnma6a    | 0 | 0 | 0.11  | 0 | 0 | 0.11  | 0 | 0 | 0 | 0 | 0 | 0 | 0 |
| ly6e      | 0 | 0 | 0.11  | 0 | 0 | 0.11  | 0 | 0 | 0 | 0 | 0 | 0 | 0 |
| nipsnap3a | 0 | 0 | 0.101 | 0 | 0 | 0.101 | 0 | 0 | 0 | 0 | 0 | 0 | 0 |

|          |   |   |       |   |   |       |   |   |   |   |   |   |   |
|----------|---|---|-------|---|---|-------|---|---|---|---|---|---|---|
| fh       | 0 | 0 | 0.109 | 0 | 0 | 0.109 | 0 | 0 | 0 | 0 | 0 | 0 | 0 |
| hsr      | 0 | 0 | 0.11  | 0 | 0 | 0.11  | 0 | 0 | 0 | 0 | 0 | 0 | 0 |
| hbm      | 0 | 0 | 0.117 | 0 | 0 | 0.117 | 0 | 0 | 0 | 0 | 0 | 0 | 0 |
| bola1    | 0 | 0 | 0.118 | 0 | 0 | 0.118 | 0 | 0 | 0 | 0 | 0 | 0 | 0 |
| kdm2a    | 0 | 0 | 0.12  | 0 | 0 | 0.12  | 0 | 0 | 0 | 0 | 0 | 0 | 0 |
| slc35g1  | 0 | 0 | 0.12  | 0 | 0 | 0.12  | 0 | 0 | 0 | 0 | 0 | 0 | 0 |
| cox2     | 0 | 0 | 0.121 | 0 | 0 | 0.121 | 0 | 0 | 0 | 0 | 0 | 0 | 0 |
| col21a1  | 0 | 0 | 0.119 | 0 | 0 | 0.119 | 0 | 0 | 0 | 0 | 0 | 0 | 0 |
| pter     | 0 | 0 | 0.119 | 0 | 0 | 0.119 | 0 | 0 | 0 | 0 | 0 | 0 | 0 |
| tmem241  | 0 | 0 | 0.118 | 0 | 0 | 0.118 | 0 | 0 | 0 | 0 | 0 | 0 | 0 |
| rpl35    | 0 | 0 | 0.118 | 0 | 0 | 0.118 | 0 | 0 | 0 | 0 | 0 | 0 | 0 |
| ppln1    | 0 | 0 | 0.118 | 0 | 0 | 0.118 | 0 | 0 | 0 | 0 | 0 | 0 | 0 |
| hres1    | 0 | 0 | 0.109 | 0 | 0 | 0.109 | 0 | 0 | 0 | 0 | 0 | 0 | 0 |
| mir125a  | 0 | 0 | 0.101 | 0 | 0 | 0.101 | 0 | 0 | 0 | 0 | 0 | 0 | 0 |
| tigd2    | 0 | 0 | 0.107 | 0 | 0 | 0.107 | 0 | 0 | 0 | 0 | 0 | 0 | 0 |
| smr3a    | 0 | 0 | 0.105 | 0 | 0 | 0.105 | 0 | 0 | 0 | 0 | 0 | 0 | 0 |
| tigd1    | 0 | 0 | 0.107 | 0 | 0 | 0.107 | 0 | 0 | 0 | 0 | 0 | 0 | 0 |
| vangl2   | 0 | 0 | 0.105 | 0 | 0 | 0.105 | 0 | 0 | 0 | 0 | 0 | 0 | 0 |
| sdhc     | 0 | 0 | 0.107 | 0 | 0 | 0.107 | 0 | 0 | 0 | 0 | 0 | 0 | 0 |
| dvt21    | 0 | 0 | 0.106 | 0 | 0 | 0.106 | 0 | 0 | 0 | 0 | 0 | 0 | 0 |
| ftmt     | 0 | 0 | 0.106 | 0 | 0 | 0.106 | 0 | 0 | 0 | 0 | 0 | 0 | 0 |
| ech1     | 0 | 0 | 0.107 | 0 | 0 | 0.107 | 0 | 0 | 0 | 0 | 0 | 0 | 0 |
| phyhd1   | 0 | 0 | 0.107 | 0 | 0 | 0.107 | 0 | 0 | 0 | 0 | 0 | 0 | 0 |
| tp73-as1 | 0 | 0 | 0.108 | 0 | 0 | 0.108 | 0 | 0 | 0 | 0 | 0 | 0 | 0 |
| sdhaf2   | 0 | 0 | 0.174 | 0 | 0 | 0.174 | 0 | 0 | 0 | 0 | 0 | 0 | 0 |
| rab40c   | 0 | 0 | 0.102 | 0 | 0 | 0.102 | 0 | 0 | 0 | 0 | 0 | 0 | 0 |
| ido1     | 0 | 0 | 0.102 | 0 | 0 | 0.102 | 0 | 0 | 0 | 0 | 0 | 0 | 0 |
| znf229   | 0 | 0 | 0.109 | 0 | 0 | 0.109 | 0 | 0 | 0 | 0 | 0 | 0 | 0 |
| akr1c1   | 0 | 0 | 0.102 | 0 | 0 | 0.102 | 0 | 0 | 0 | 0 | 0 | 0 | 0 |
| irg1     | 0 | 0 | 0.102 | 0 | 0 | 0.102 | 0 | 0 | 0 | 0 | 0 | 0 | 0 |
| abcb7    | 0 | 0 | 0.109 | 0 | 0 | 0.109 | 0 | 0 | 0 | 0 | 0 | 0 | 0 |
| megf10   | 0 | 0 | 0.105 | 0 | 0 | 0.105 | 0 | 0 | 0 | 0 | 0 | 0 | 0 |
| atad3b   | 0 | 0 | 0.104 | 0 | 0 | 0.104 | 0 | 0 | 0 | 0 | 0 | 0 | 0 |
| lmx1a    | 0 | 0 | 0.122 | 0 | 0 | 0.122 | 0 | 0 | 0 | 0 | 0 | 0 | 0 |
| frrs1l   | 0 | 0 | 0.117 | 0 | 0 | 0.117 | 0 | 0 | 0 | 0 | 0 | 0 | 0 |
| tcfl5    | 0 | 0 | 0.122 | 0 | 0 | 0.122 | 0 | 0 | 0 | 0 | 0 | 0 | 0 |
| hmgxb4   | 0 | 0 | 0.148 | 0 | 0 | 0.148 | 0 | 0 | 0 | 0 | 0 | 0 | 0 |
| tmem25   | 0 | 0 | 0.148 | 0 | 0 | 0.148 | 0 | 0 | 0 | 0 | 0 | 0 | 0 |
| il10rb   | 0 | 0 | 0.149 | 0 | 0 | 0.149 | 0 | 0 | 0 | 0 | 0 | 0 | 0 |
| prune    | 0 | 0 | 0.146 | 0 | 0 | 0.146 | 0 | 0 | 0 | 0 | 0 | 0 | 0 |
| c12orf45 | 0 | 0 | 0.146 | 0 | 0 | 0.146 | 0 | 0 | 0 | 0 | 0 | 0 | 0 |

|          |     |   |       |   |   |       |     |   |   |   |       |       |   |
|----------|-----|---|-------|---|---|-------|-----|---|---|---|-------|-------|---|
| iyd      | 0   | 0 | 0.14  | 0 | 0 | 0.14  | 0   | 0 | 0 | 0 | 0     | 0     | 0 |
| tmem163  | 0   | 0 | 0.145 | 0 | 0 | 0.145 | 0   | 0 | 0 | 0 | 0     | 0     | 0 |
| tyw5     | 0   | 0 | 0.145 | 0 | 0 | 0.145 | 0   | 0 | 0 | 0 | 0     | 0     | 0 |
| slc25a30 | 0   | 0 | 0.153 | 0 | 0 | 0.153 | 0   | 0 | 0 | 0 | 0     | 0     | 0 |
| lias     | 0   | 0 | 0.153 | 0 | 0 | 0.153 | 0   | 0 | 0 | 0 | 0     | 0     | 0 |
| lap3     | 0   | 0 | 0.16  | 0 | 0 | 0.16  | 0   | 0 | 0 | 0 | 0     | 0     | 0 |
| iddm4    | 0   | 0 | 0.162 | 0 | 0 | 0.162 | 0   | 0 | 0 | 0 | 0     | 0     | 0 |
| dbh-as1  | 0   | 0 | 0.17  | 0 | 0 | 0.17  | 0   | 0 | 0 | 0 | 0     | 0     | 0 |
| midn     | 0   | 0 | 0.171 | 0 | 0 | 0.171 | 0   | 0 | 0 | 0 | 0     | 0     | 0 |
| clf      | 0   | 0 | 0.159 | 0 | 0 | 0.159 | 0   | 0 | 0 | 0 | 0     | 0     | 0 |
| tet2     | 0   | 0 | 0.157 | 0 | 0 | 0.157 | 0   | 0 | 0 | 0 | 0     | 0     | 0 |
| il19     | 0   | 0 | 0.154 | 0 | 0 | 0.154 | 0   | 0 | 0 | 0 | 0     | 0     | 0 |
| srxn1    | 0   | 0 | 0.155 | 0 | 0 | 0.155 | 0   | 0 | 0 | 0 | 0     | 0     | 0 |
| pcdha12  | 0   | 0 | 0.155 | 0 | 0 | 0.155 | 0   | 0 | 0 | 0 | 0     | 0     | 0 |
| wbs2     | 0   | 0 | 0.14  | 0 | 0 | 0.14  | 0   | 0 | 0 | 0 | 0     | 0     | 0 |
| dhcr24   | 0   | 0 | 0.147 | 0 | 0 | 0.147 | 0   | 0 | 0 | 0 | 0     | 0     | 0 |
| cirh1a   | 0   | 0 | 0.127 | 0 | 0 | 0.127 | 0   | 0 | 0 | 0 | 0     | 0     | 0 |
| kaza     | 0   | 0 | 0.127 | 0 | 0 | 0.127 | 0   | 0 | 0 | 0 | 0     | 0     | 0 |
| il17rel  | 0   | 0 | 0.125 | 0 | 0 | 0.125 | 0   | 0 | 0 | 0 | 0     | 0     | 0 |
| lhfp     | 0   | 0 | 0.134 | 0 | 0 | 0.134 | 0   | 0 | 0 | 0 | 0     | 0     | 0 |
| txnr1    | 0   | 0 | 0.133 | 0 | 0 | 0.133 | 0   | 0 | 0 | 0 | 0     | 0     | 0 |
| tysnd1   | 0   | 0 | 0.128 | 0 | 0 | 0.128 | 0   | 0 | 0 | 0 | 0     | 0     | 0 |
| tmx2     | 0   | 0 | 0.129 | 0 | 0 | 0.129 | 0   | 0 | 0 | 0 | 0     | 0     | 0 |
| ascl4    | 0   | 0 | 0.131 | 0 | 0 | 0.131 | 0   | 0 | 0 | 0 | 0     | 0     | 0 |
| cmt2i2   | 0   | 0 | 0.133 | 0 | 0 | 0.133 | 0   | 0 | 0 | 0 | 0     | 0     | 0 |
| por      | 0   | 0 | 0.135 | 0 | 0 | 0.135 | 0   | 0 | 0 | 0 | 0     | 0     | 0 |
| mocos    | 0   | 0 | 0.124 | 0 | 0 | 0.124 | 0   | 0 | 0 | 0 | 0     | 0     | 0 |
| zcchc6   | 0   | 0 | 0.139 | 0 | 0 | 0.139 | 0   | 0 | 0 | 0 | 0     | 0     | 0 |
| murc     | 0   | 0 | 0.124 | 0 | 0 | 0.124 | 0   | 0 | 0 | 0 | 0     | 0     | 0 |
| tma7     | 0   | 0 | 0.139 | 0 | 0 | 0.139 | 0   | 0 | 0 | 0 | 0     | 0     | 0 |
| il10     | 0   | 0 | 0.136 | 0 | 0 | 0.136 | 0   | 0 | 0 | 0 | 0     | 0     | 0 |
| cxxc4    | 0   | 0 | 0.124 | 0 | 0 | 0.124 | 0   | 0 | 0 | 0 | 0     | 0     | 0 |
| phox2b   | 0   | 0 | 0.135 | 0 | 0 | 0.135 | 0   | 0 | 0 | 0 | 0     | 0     | 0 |
| pah      | 0   | 0 | 0.136 | 0 | 0 | 0.136 | 0   | 0 | 0 | 0 | 0     | 0     | 0 |
| mknk2    | 0.1 | 0 | 0     | 0 | 0 | 0     | 0.1 | 0 | 0 | 0 | 0     | 0     | 0 |
| gpr79    | 0.1 | 0 | 0     | 0 | 0 | 0     | 0.1 | 0 | 0 | 0 | 0     | 0     | 0 |
| mrx20    | 0   | 0 | 0     | 0 | 0 | 0     | 0   | 0 | 0 | 0 | 0.125 | 0.125 | 0 |
| nim1     | 0   | 0 | 0     | 0 | 0 | 0     | 0   | 0 | 0 | 0 | 0.126 | 0.126 | 0 |
| taok1    | 0   | 0 | 0     | 0 | 0 | 0     | 0   | 0 | 0 | 0 | 0.127 | 0.125 | 0 |
| mrx65    | 0   | 0 | 0     | 0 | 0 | 0     | 0   | 0 | 0 | 0 | 0.119 | 0.119 | 0 |
| crnk1    | 0   | 0 | 0     | 0 | 0 | 0     | 0   | 0 | 0 | 0 | 0.124 | 0.124 | 0 |

|              |   |   |   |   |   |   |   |   |   |   |       |       |   |
|--------------|---|---|---|---|---|---|---|---|---|---|-------|-------|---|
| mcm4         | 0 | 0 | 0 | 0 | 0 | 0 | 0 | 0 | 0 | 0 | 0.12  | 0.118 | 0 |
| lrguk        | 0 | 0 | 0 | 0 | 0 | 0 | 0 | 0 | 0 | 0 | 0.133 | 0.133 | 0 |
| pacs1        | 0 | 0 | 0 | 0 | 0 | 0 | 0 | 0 | 0 | 0 | 0.14  | 0.139 | 0 |
| strada       | 0 | 0 | 0 | 0 | 0 | 0 | 0 | 0 | 0 | 0 | 0.14  | 0.14  | 0 |
| plcg1        | 0 | 0 | 0 | 0 | 0 | 0 | 0 | 0 | 0 | 0 | 0.144 | 0.143 | 0 |
| morc2        | 0 | 0 | 0 | 0 | 0 | 0 | 0 | 0 | 0 | 0 | 0.146 | 0.146 | 0 |
| tnk1         | 0 | 0 | 0 | 0 | 0 | 0 | 0 | 0 | 0 | 0 | 0.193 | 0.192 | 0 |
| arhgef5      | 0 | 0 | 0 | 0 | 0 | 0 | 0 | 0 | 0 | 0 | 0.191 | 0.19  | 0 |
| sowaha       | 0 | 0 | 0 | 0 | 0 | 0 | 0 | 0 | 0 | 0 | 0.135 | 0.134 | 0 |
| sowahc       | 0 | 0 | 0 | 0 | 0 | 0 | 0 | 0 | 0 | 0 | 0.135 | 0.134 | 0 |
| pgk1p1       | 0 | 0 | 0 | 0 | 0 | 0 | 0 | 0 | 0 | 0 | 0.13  | 0.13  | 0 |
| mxr8         | 0 | 0 | 0 | 0 | 0 | 0 | 0 | 0 | 0 | 0 | 0.128 | 0.128 | 0 |
| zmat3        | 0 | 0 | 0 | 0 | 0 | 0 | 0 | 0 | 0 | 0 | 0.132 | 0.131 | 0 |
| ctdnep1      | 0 | 0 | 0 | 0 | 0 | 0 | 0 | 0 | 0 | 0 | 0.119 | 0.117 | 0 |
| sowahd       | 0 | 0 | 0 | 0 | 0 | 0 | 0 | 0 | 0 | 0 | 0.135 | 0.134 | 0 |
| nelfcd       | 0 | 0 | 0 | 0 | 0 | 0 | 0 | 0 | 0 | 0 | 0.128 | 0.126 | 0 |
| rasgrf2      | 0 | 0 | 0 | 0 | 0 | 0 | 0 | 0 | 0 | 0 | 0.106 | 0.105 | 0 |
| tanc1        | 0 | 0 | 0 | 0 | 0 | 0 | 0 | 0 | 0 | 0 | 0.103 | 0.103 | 0 |
| ribc2        | 0 | 0 | 0 | 0 | 0 | 0 | 0 | 0 | 0 | 0 | 0.103 | 0.102 | 0 |
| spock3       | 0 | 0 | 0 | 0 | 0 | 0 | 0 | 0 | 0 | 0 | 0.103 | 0.103 | 0 |
| dclk3        | 0 | 0 | 0 | 0 | 0 | 0 | 0 | 0 | 0 | 0 | 0.104 | 0.103 | 0 |
| chl1         | 0 | 0 | 0 | 0 | 0 | 0 | 0 | 0 | 0 | 0 | 0.104 | 0.103 | 0 |
| mmp23b       | 0 | 0 | 0 | 0 | 0 | 0 | 0 | 0 | 0 | 0 | 0.104 | 0.104 | 0 |
| mxr1         | 0 | 0 | 0 | 0 | 0 | 0 | 0 | 0 | 0 | 0 | 0.104 | 0.104 | 0 |
| hist4h4      | 0 | 0 | 0 | 0 | 0 | 0 | 0 | 0 | 0 | 0 | 0.102 | 0.102 | 0 |
| exoc31       | 0 | 0 | 0 | 0 | 0 | 0 | 0 | 0 | 0 | 0 | 0.102 | 0.102 | 0 |
| limd1        | 0 | 0 | 0 | 0 | 0 | 0 | 0 | 0 | 0 | 0 | 0.101 | 0.1   | 0 |
| ushbp1       | 0 | 0 | 0 | 0 | 0 | 0 | 0 | 0 | 0 | 0 | 0.101 | 0.101 | 0 |
| gas7         | 0 | 0 | 0 | 0 | 0 | 0 | 0 | 0 | 0 | 0 | 0.101 | 0.101 | 0 |
| napb         | 0 | 0 | 0 | 0 | 0 | 0 | 0 | 0 | 0 | 0 | 0.101 | 0.101 | 0 |
| wipf3        | 0 | 0 | 0 | 0 | 0 | 0 | 0 | 0 | 0 | 0 | 0.102 | 0.101 | 0 |
| igkv3or2-268 | 0 | 0 | 0 | 0 | 0 | 0 | 0 | 0 | 0 | 0 | 0.116 | 0.115 | 0 |
| klh10        | 0 | 0 | 0 | 0 | 0 | 0 | 0 | 0 | 0 | 0 | 0.105 | 0.104 | 0 |
| tmem158      | 0 | 0 | 0 | 0 | 0 | 0 | 0 | 0 | 0 | 0 | 0.103 | 0.102 | 0 |
| wash6p       | 0 | 0 | 0 | 0 | 0 | 0 | 0 | 0 | 0 | 0 | 0.11  | 0.11  | 0 |
| mxr26        | 0 | 0 | 0 | 0 | 0 | 0 | 0 | 0 | 0 | 0 | 0.11  | 0.11  | 0 |
| ppa2         | 0 | 0 | 0 | 0 | 0 | 0 | 0 | 0 | 0 | 0 | 0.109 | 0.108 | 0 |
| pvrl1        | 0 | 0 | 0 | 0 | 0 | 0 | 0 | 0 | 0 | 0 | 0.105 | 0.105 | 0 |
| map2k1       | 0 | 0 | 0 | 0 | 0 | 0 | 0 | 0 | 0 | 0 | 0.111 | 0.11  | 0 |
| matk         | 0 | 0 | 0 | 0 | 0 | 0 | 0 | 0 | 0 | 0 | 0.115 | 0.113 | 0 |
| map4k2       | 0 | 0 | 0 | 0 | 0 | 0 | 0 | 0 | 0 | 0 | 0.113 | 0.112 | 0 |

|          |   |   |   |   |   |   |   |   |   |   |       |       |       |
|----------|---|---|---|---|---|---|---|---|---|---|-------|-------|-------|
| efhc2    | 0 | 0 | 0 | 0 | 0 | 0 | 0 | 0 | 0 | 0 | 0.108 | 0.108 | 0     |
| uso1     | 0 | 0 | 0 | 0 | 0 | 0 | 0 | 0 | 0 | 0 | 0.111 | 0.109 | 0     |
| eec2     | 0 | 0 | 0 | 0 | 0 | 0 | 0 | 0 | 0 | 0 | 0.106 | 0.106 | 0     |
| map3k10  | 0 | 0 | 0 | 0 | 0 | 0 | 0 | 0 | 0 | 0 | 0.108 | 0.107 | 0     |
| ninj2    | 0 | 0 | 0 | 0 | 0 | 0 | 0 | 0 | 0 | 0 | 0.105 | 0.105 | 0     |
| itgb1    | 0 | 0 | 0 | 0 | 0 | 0 | 0 | 0 | 0 | 0 | 0.108 | 0.107 | 0     |
| chst9    | 0 | 0 | 0 | 0 | 0 | 0 | 0 | 0 | 0 | 0 | 0.107 | 0.106 | 0     |
| stradb   | 0 | 0 | 0 | 0 | 0 | 0 | 0 | 0 | 0 | 0 | 0.108 | 0.107 | 0     |
| iqub     | 0 | 0 | 0 | 0 | 0 | 0 | 0 | 0 | 0 | 0 | 0.108 | 0.108 | 0     |
| edc4     | 0 | 0 | 0 | 0 | 0 | 0 | 0 | 0 | 0 | 0 | 0     | 0     | 0.109 |
| ntsr1    | 0 | 0 | 0 | 0 | 0 | 0 | 0 | 0 | 0 | 0 | 0     | 0     | 0.107 |
| tmeff1   | 0 | 0 | 0 | 0 | 0 | 0 | 0 | 0 | 0 | 0 | 0     | 0     | 0.105 |
| ddx19a   | 0 | 0 | 0 | 0 | 0 | 0 | 0 | 0 | 0 | 0 | 0     | 0     | 0.109 |
| fgd1     | 0 | 0 | 0 | 0 | 0 | 0 | 0 | 0 | 0 | 0 | 0     | 0     | 0.108 |
| tm9sf3   | 0 | 0 | 0 | 0 | 0 | 0 | 0 | 0 | 0 | 0 | 0     | 0     | 0.106 |
| pth2     | 0 | 0 | 0 | 0 | 0 | 0 | 0 | 0 | 0 | 0 | 0     | 0     | 0.107 |
| rnu12-2p | 0 | 0 | 0 | 0 | 0 | 0 | 0 | 0 | 0 | 0 | 0     | 0     | 0.108 |
| tsks     | 0 | 0 | 0 | 0 | 0 | 0 | 0 | 0 | 0 | 0 | 0     | 0     | 0.11  |
| rxfp3    | 0 | 0 | 0 | 0 | 0 | 0 | 0 | 0 | 0 | 0 | 0     | 0     | 0.109 |
| piwil3   | 0 | 0 | 0 | 0 | 0 | 0 | 0 | 0 | 0 | 0 | 0     | 0     | 0.107 |
| rest     | 0 | 0 | 0 | 0 | 0 | 0 | 0 | 0 | 0 | 0 | 0     | 0     | 0.108 |
| mycbp2   | 0 | 0 | 0 | 0 | 0 | 0 | 0 | 0 | 0 | 0 | 0     | 0     | 0.108 |
| upk2     | 0 | 0 | 0 | 0 | 0 | 0 | 0 | 0 | 0 | 0 | 0     | 0     | 0.107 |
| apod     | 0 | 0 | 0 | 0 | 0 | 0 | 0 | 0 | 0 | 0 | 0     | 0     | 0.102 |
| ier3     | 0 | 0 | 0 | 0 | 0 | 0 | 0 | 0 | 0 | 0 | 0     | 0     | 0.104 |
| cd2      | 0 | 0 | 0 | 0 | 0 | 0 | 0 | 0 | 0 | 0 | 0     | 0     | 0.106 |
| plag1    | 0 | 0 | 0 | 0 | 0 | 0 | 0 | 0 | 0 | 0 | 0     | 0     | 0.108 |
| abhd12   | 0 | 0 | 0 | 0 | 0 | 0 | 0 | 0 | 0 | 0 | 0     | 0     | 0.102 |
| spats2   | 0 | 0 | 0 | 0 | 0 | 0 | 0 | 0 | 0 | 0 | 0     | 0     | 0.101 |
| ube2l4   | 0 | 0 | 0 | 0 | 0 | 0 | 0 | 0 | 0 | 0 | 0     | 0     | 0.103 |
| ulk2     | 0 | 0 | 0 | 0 | 0 | 0 | 0 | 0 | 0 | 0 | 0     | 0     | 0.109 |
| slc5a7   | 0 | 0 | 0 | 0 | 0 | 0 | 0 | 0 | 0 | 0 | 0     | 0     | 0.105 |
| ube3ap1  | 0 | 0 | 0 | 0 | 0 | 0 | 0 | 0 | 0 | 0 | 0     | 0     | 0.103 |
| strn1    | 0 | 0 | 0 | 0 | 0 | 0 | 0 | 0 | 0 | 0 | 0     | 0     | 0.112 |
| hs3st4   | 0 | 0 | 0 | 0 | 0 | 0 | 0 | 0 | 0 | 0 | 0     | 0     | 0.104 |
| ms4a6a   | 0 | 0 | 0 | 0 | 0 | 0 | 0 | 0 | 0 | 0 | 0     | 0     | 0.103 |
| ube3ap2  | 0 | 0 | 0 | 0 | 0 | 0 | 0 | 0 | 0 | 0 | 0     | 0     | 0.103 |
| vn1r7p   | 0 | 0 | 0 | 0 | 0 | 0 | 0 | 0 | 0 | 0 | 0     | 0     | 0.166 |
| stac2    | 0 | 0 | 0 | 0 | 0 | 0 | 0 | 0 | 0 | 0 | 0     | 0     | 0.195 |
| zap70    | 0 | 0 | 0 | 0 | 0 | 0 | 0 | 0 | 0 | 0 | 0     | 0     | 0.198 |
| mvb12a   | 0 | 0 | 0 | 0 | 0 | 0 | 0 | 0 | 0 | 0 | 0     | 0     | 0.196 |

|           |   |   |   |   |   |   |   |   |   |   |   |   |       |
|-----------|---|---|---|---|---|---|---|---|---|---|---|---|-------|
| ubash3b   | 0 | 0 | 0 | 0 | 0 | 0 | 0 | 0 | 0 | 0 | 0 | 0 | 0.204 |
| nts       | 0 | 0 | 0 | 0 | 0 | 0 | 0 | 0 | 0 | 0 | 0 | 0 | 0.202 |
| rfn115    | 0 | 0 | 0 | 0 | 0 | 0 | 0 | 0 | 0 | 0 | 0 | 0 | 0.202 |
| fam92a1   | 0 | 0 | 0 | 0 | 0 | 0 | 0 | 0 | 0 | 0 | 0 | 0 | 0.193 |
| slc17a8   | 0 | 0 | 0 | 0 | 0 | 0 | 0 | 0 | 0 | 0 | 0 | 0 | 0.19  |
| fpr2      | 0 | 0 | 0 | 0 | 0 | 0 | 0 | 0 | 0 | 0 | 0 | 0 | 0.187 |
| spry3     | 0 | 0 | 0 | 0 | 0 | 0 | 0 | 0 | 0 | 0 | 0 | 0 | 0.188 |
| nipsnap3b | 0 | 0 | 0 | 0 | 0 | 0 | 0 | 0 | 0 | 0 | 0 | 0 | 0.187 |
| znf287    | 0 | 0 | 0 | 0 | 0 | 0 | 0 | 0 | 0 | 0 | 0 | 0 | 0.191 |
| hmga1p1   | 0 | 0 | 0 | 0 | 0 | 0 | 0 | 0 | 0 | 0 | 0 | 0 | 0.189 |
| gal       | 0 | 0 | 0 | 0 | 0 | 0 | 0 | 0 | 0 | 0 | 0 | 0 | 0.203 |
| trim3     | 0 | 0 | 0 | 0 | 0 | 0 | 0 | 0 | 0 | 0 | 0 | 0 | 0.11  |
| fam19a5   | 0 | 0 | 0 | 0 | 0 | 0 | 0 | 0 | 0 | 0 | 0 | 0 | 0.212 |
| mrgpre    | 0 | 0 | 0 | 0 | 0 | 0 | 0 | 0 | 0 | 0 | 0 | 0 | 0.214 |
| cd2bp2    | 0 | 0 | 0 | 0 | 0 | 0 | 0 | 0 | 0 | 0 | 0 | 0 | 0.222 |
| selt      | 0 | 0 | 0 | 0 | 0 | 0 | 0 | 0 | 0 | 0 | 0 | 0 | 0.215 |
| ostf1     | 0 | 0 | 0 | 0 | 0 | 0 | 0 | 0 | 0 | 0 | 0 | 0 | 0.221 |
| laptm4a   | 0 | 0 | 0 | 0 | 0 | 0 | 0 | 0 | 0 | 0 | 0 | 0 | 0.218 |
| rit2      | 0 | 0 | 0 | 0 | 0 | 0 | 0 | 0 | 0 | 0 | 0 | 0 | 0.213 |
| spred1    | 0 | 0 | 0 | 0 | 0 | 0 | 0 | 0 | 0 | 0 | 0 | 0 | 0.214 |
| spred2    | 0 | 0 | 0 | 0 | 0 | 0 | 0 | 0 | 0 | 0 | 0 | 0 | 0.211 |
| lgsn      | 0 | 0 | 0 | 0 | 0 | 0 | 0 | 0 | 0 | 0 | 0 | 0 | 0.204 |
| opcml     | 0 | 0 | 0 | 0 | 0 | 0 | 0 | 0 | 0 | 0 | 0 | 0 | 0.208 |
| spry4     | 0 | 0 | 0 | 0 | 0 | 0 | 0 | 0 | 0 | 0 | 0 | 0 | 0.211 |
| lrrc20    | 0 | 0 | 0 | 0 | 0 | 0 | 0 | 0 | 0 | 0 | 0 | 0 | 0.208 |
| arih2     | 0 | 0 | 0 | 0 | 0 | 0 | 0 | 0 | 0 | 0 | 0 | 0 | 0.185 |
| sphkap    | 0 | 0 | 0 | 0 | 0 | 0 | 0 | 0 | 0 | 0 | 0 | 0 | 0.184 |
| crcp      | 0 | 0 | 0 | 0 | 0 | 0 | 0 | 0 | 0 | 0 | 0 | 0 | 0.16  |
| gpr151    | 0 | 0 | 0 | 0 | 0 | 0 | 0 | 0 | 0 | 0 | 0 | 0 | 0.159 |
| rtp3      | 0 | 0 | 0 | 0 | 0 | 0 | 0 | 0 | 0 | 0 | 0 | 0 | 0.162 |
| macrod2   | 0 | 0 | 0 | 0 | 0 | 0 | 0 | 0 | 0 | 0 | 0 | 0 | 0.161 |
| trpm5     | 0 | 0 | 0 | 0 | 0 | 0 | 0 | 0 | 0 | 0 | 0 | 0 | 0.164 |
| hgs       | 0 | 0 | 0 | 0 | 0 | 0 | 0 | 0 | 0 | 0 | 0 | 0 | 0.167 |
| ppp2r2a   | 0 | 0 | 0 | 0 | 0 | 0 | 0 | 0 | 0 | 0 | 0 | 0 | 0.169 |
| elfn2     | 0 | 0 | 0 | 0 | 0 | 0 | 0 | 0 | 0 | 0 | 0 | 0 | 0.162 |
| mpp6      | 0 | 0 | 0 | 0 | 0 | 0 | 0 | 0 | 0 | 0 | 0 | 0 | 0.158 |
| gas2l2    | 0 | 0 | 0 | 0 | 0 | 0 | 0 | 0 | 0 | 0 | 0 | 0 | 0.156 |
| abracl    | 0 | 0 | 0 | 0 | 0 | 0 | 0 | 0 | 0 | 0 | 0 | 0 | 0.159 |
| slmap     | 0 | 0 | 0 | 0 | 0 | 0 | 0 | 0 | 0 | 0 | 0 | 0 | 0.164 |
| anks1b    | 0 | 0 | 0 | 0 | 0 | 0 | 0 | 0 | 0 | 0 | 0 | 0 | 0.161 |
| ndufa5    | 0 | 0 | 0 | 0 | 0 | 0 | 0 | 0 | 0 | 0 | 0 | 0 | 0.167 |

|           |   |   |   |   |   |   |   |   |   |   |   |   |       |
|-----------|---|---|---|---|---|---|---|---|---|---|---|---|-------|
| p2rx3     | 0 | 0 | 0 | 0 | 0 | 0 | 0 | 0 | 0 | 0 | 0 | 0 | 0.167 |
| nalcn     | 0 | 0 | 0 | 0 | 0 | 0 | 0 | 0 | 0 | 0 | 0 | 0 | 0.18  |
| mcur1     | 0 | 0 | 0 | 0 | 0 | 0 | 0 | 0 | 0 | 0 | 0 | 0 | 0.178 |
| phka2     | 0 | 0 | 0 | 0 | 0 | 0 | 0 | 0 | 0 | 0 | 0 | 0 | 0.182 |
| avil      | 0 | 0 | 0 | 0 | 0 | 0 | 0 | 0 | 0 | 0 | 0 | 0 | 0.183 |
| dnah7     | 0 | 0 | 0 | 0 | 0 | 0 | 0 | 0 | 0 | 0 | 0 | 0 | 0.184 |
| il17d     | 0 | 0 | 0 | 0 | 0 | 0 | 0 | 0 | 0 | 0 | 0 | 0 | 0.179 |
| spry1     | 0 | 0 | 0 | 0 | 0 | 0 | 0 | 0 | 0 | 0 | 0 | 0 | 0.18  |
| lrrc2-as1 | 0 | 0 | 0 | 0 | 0 | 0 | 0 | 0 | 0 | 0 | 0 | 0 | 0.17  |
| sh3glb2   | 0 | 0 | 0 | 0 | 0 | 0 | 0 | 0 | 0 | 0 | 0 | 0 | 0.17  |
| flt1p1    | 0 | 0 | 0 | 0 | 0 | 0 | 0 | 0 | 0 | 0 | 0 | 0 | 0.17  |
| fli1      | 0 | 0 | 0 | 0 | 0 | 0 | 0 | 0 | 0 | 0 | 0 | 0 | 0.172 |
| scn11a    | 0 | 0 | 0 | 0 | 0 | 0 | 0 | 0 | 0 | 0 | 0 | 0 | 0.175 |
| ccdc22    | 0 | 0 | 0 | 0 | 0 | 0 | 0 | 0 | 0 | 0 | 0 | 0 | 0.219 |
| prickle1  | 0 | 0 | 0 | 0 | 0 | 0 | 0 | 0 | 0 | 0 | 0 | 0 | 0.221 |
| mzb1      | 0 | 0 | 0 | 0 | 0 | 0 | 0 | 0 | 0 | 0 | 0 | 0 | 0.304 |
| tacr3     | 0 | 0 | 0 | 0 | 0 | 0 | 0 | 0 | 0 | 0 | 0 | 0 | 0.301 |
| gldcp1    | 0 | 0 | 0 | 0 | 0 | 0 | 0 | 0 | 0 | 0 | 0 | 0 | 0.307 |
| tcn1      | 0 | 0 | 0 | 0 | 0 | 0 | 0 | 0 | 0 | 0 | 0 | 0 | 0.32  |
| tac4      | 0 | 0 | 0 | 0 | 0 | 0 | 0 | 0 | 0 | 0 | 0 | 0 | 0.328 |
| tac3      | 0 | 0 | 0 | 0 | 0 | 0 | 0 | 0 | 0 | 0 | 0 | 0 | 0.322 |
| gapvd1    | 0 | 0 | 0 | 0 | 0 | 0 | 0 | 0 | 0 | 0 | 0 | 0 | 0.303 |
| fra10ac1  | 0 | 0 | 0 | 0 | 0 | 0 | 0 | 0 | 0 | 0 | 0 | 0 | 0.301 |
| tacr2     | 0 | 0 | 0 | 0 | 0 | 0 | 0 | 0 | 0 | 0 | 0 | 0 | 0.29  |
| psmd6     | 0 | 0 | 0 | 0 | 0 | 0 | 0 | 0 | 0 | 0 | 0 | 0 | 0.293 |
| tacr1     | 0 | 0 | 0 | 0 | 0 | 0 | 0 | 0 | 0 | 0 | 0 | 0 | 0.292 |
| cubn      | 0 | 0 | 0 | 0 | 0 | 0 | 0 | 0 | 0 | 0 | 0 | 0 | 0.301 |
| fra10a    | 0 | 0 | 0 | 0 | 0 | 0 | 0 | 0 | 0 | 0 | 0 | 0 | 0.301 |
| adcyp1r1  | 0 | 0 | 0 | 0 | 0 | 0 | 0 | 0 | 0 | 0 | 0 | 0 | 0.334 |
| dfnb14    | 0 | 0 | 0 | 0 | 0 | 0 | 0 | 0 | 0 | 0 | 0 | 0 | 0.339 |
| tac1      | 0 | 0 | 0 | 0 | 0 | 0 | 0 | 0 | 0 | 0 | 0 | 0 | 0.385 |
| rnf126    | 0 | 0 | 0 | 0 | 0 | 0 | 0 | 0 | 0 | 0 | 0 | 0 | 0.388 |
| ubash3a   | 0 | 0 | 0 | 0 | 0 | 0 | 0 | 0 | 0 | 0 | 0 | 0 | 0.413 |
| jbs       | 0 | 0 | 0 | 0 | 0 | 0 | 0 | 0 | 0 | 0 | 0 | 0 | 0.432 |
| dcaf4     | 0 | 0 | 0 | 0 | 0 | 0 | 0 | 0 | 0 | 0 | 0 | 0 | 0.504 |
| mpi       | 0 | 0 | 0 | 0 | 0 | 0 | 0 | 0 | 0 | 0 | 0 | 0 | 0.437 |
| adnp      | 0 | 0 | 0 | 0 | 0 | 0 | 0 | 0 | 0 | 0 | 0 | 0 | 0.385 |
| vip       | 0 | 0 | 0 | 0 | 0 | 0 | 0 | 0 | 0 | 0 | 0 | 0 | 0.384 |
| stt3a     | 0 | 0 | 0 | 0 | 0 | 0 | 0 | 0 | 0 | 0 | 0 | 0 | 0.346 |
| adcyp1    | 0 | 0 | 0 | 0 | 0 | 0 | 0 | 0 | 0 | 0 | 0 | 0 | 0.339 |
| vipr2     | 0 | 0 | 0 | 0 | 0 | 0 | 0 | 0 | 0 | 0 | 0 | 0 | 0.342 |

|          |   |   |   |   |   |   |   |   |   |   |   |   |       |
|----------|---|---|---|---|---|---|---|---|---|---|---|---|-------|
| vipr1    | 0 | 0 | 0 | 0 | 0 | 0 | 0 | 0 | 0 | 0 | 0 | 0 | 0.347 |
| bcas2    | 0 | 0 | 0 | 0 | 0 | 0 | 0 | 0 | 0 | 0 | 0 | 0 | 0.363 |
| ccdc93   | 0 | 0 | 0 | 0 | 0 | 0 | 0 | 0 | 0 | 0 | 0 | 0 | 0.288 |
| eri2     | 0 | 0 | 0 | 0 | 0 | 0 | 0 | 0 | 0 | 0 | 0 | 0 | 0.286 |
| pirt     | 0 | 0 | 0 | 0 | 0 | 0 | 0 | 0 | 0 | 0 | 0 | 0 | 0.239 |
| sidt2    | 0 | 0 | 0 | 0 | 0 | 0 | 0 | 0 | 0 | 0 | 0 | 0 | 0.241 |
| mir519b  | 0 | 0 | 0 | 0 | 0 | 0 | 0 | 0 | 0 | 0 | 0 | 0 | 0.24  |
| c12orf39 | 0 | 0 | 0 | 0 | 0 | 0 | 0 | 0 | 0 | 0 | 0 | 0 | 0.241 |
| mep1ap2  | 0 | 0 | 0 | 0 | 0 | 0 | 0 | 0 | 0 | 0 | 0 | 0 | 0.244 |
| c9orf89  | 0 | 0 | 0 | 0 | 0 | 0 | 0 | 0 | 0 | 0 | 0 | 0 | 0.242 |
| pelo     | 0 | 0 | 0 | 0 | 0 | 0 | 0 | 0 | 0 | 0 | 0 | 0 | 0.237 |
| c8orf17  | 0 | 0 | 0 | 0 | 0 | 0 | 0 | 0 | 0 | 0 | 0 | 0 | 0.239 |
| mir500a  | 0 | 0 | 0 | 0 | 0 | 0 | 0 | 0 | 0 | 0 | 0 | 0 | 0.22  |
| mrgprd   | 0 | 0 | 0 | 0 | 0 | 0 | 0 | 0 | 0 | 0 | 0 | 0 | 0.219 |
| scamp3   | 0 | 0 | 0 | 0 | 0 | 0 | 0 | 0 | 0 | 0 | 0 | 0 | 0.229 |
| anp32f   | 0 | 0 | 0 | 0 | 0 | 0 | 0 | 0 | 0 | 0 | 0 | 0 | 0.228 |
| trpv3    | 0 | 0 | 0 | 0 | 0 | 0 | 0 | 0 | 0 | 0 | 0 | 0 | 0.228 |
| mep1ap1  | 0 | 0 | 0 | 0 | 0 | 0 | 0 | 0 | 0 | 0 | 0 | 0 | 0.244 |
| nkx1-1   | 0 | 0 | 0 | 0 | 0 | 0 | 0 | 0 | 0 | 0 | 0 | 0 | 0.244 |
| trpv1    | 0 | 0 | 0 | 0 | 0 | 0 | 0 | 0 | 0 | 0 | 0 | 0 | 0.263 |
| tff2     | 0 | 0 | 0 | 0 | 0 | 0 | 0 | 0 | 0 | 0 | 0 | 0 | 0.258 |
| cpamd8   | 0 | 0 | 0 | 0 | 0 | 0 | 0 | 0 | 0 | 0 | 0 | 0 | 0.271 |
| trpa1    | 0 | 0 | 0 | 0 | 0 | 0 | 0 | 0 | 0 | 0 | 0 | 0 | 0.272 |
| trpm8    | 0 | 0 | 0 | 0 | 0 | 0 | 0 | 0 | 0 | 0 | 0 | 0 | 0.275 |
| clybl    | 0 | 0 | 0 | 0 | 0 | 0 | 0 | 0 | 0 | 0 | 0 | 0 | 0.261 |
| rps13    | 0 | 0 | 0 | 0 | 0 | 0 | 0 | 0 | 0 | 0 | 0 | 0 | 0.254 |
| gmms     | 0 | 0 | 0 | 0 | 0 | 0 | 0 | 0 | 0 | 0 | 0 | 0 | 0.244 |
| adnp2    | 0 | 0 | 0 | 0 | 0 | 0 | 0 | 0 | 0 | 0 | 0 | 0 | 0.245 |
| mrgprx1  | 0 | 0 | 0 | 0 | 0 | 0 | 0 | 0 | 0 | 0 | 0 | 0 | 0.245 |
| trpv2    | 0 | 0 | 0 | 0 | 0 | 0 | 0 | 0 | 0 | 0 | 0 | 0 | 0.246 |
| asic3    | 0 | 0 | 0 | 0 | 0 | 0 | 0 | 0 | 0 | 0 | 0 | 0 | 0.251 |
| pigm     | 0 | 0 | 0 | 0 | 0 | 0 | 0 | 0 | 0 | 0 | 0 | 0 | 0.156 |
| scn10a   | 0 | 0 | 0 | 0 | 0 | 0 | 0 | 0 | 0 | 0 | 0 | 0 | 0.203 |
| slc17a7  | 0 | 0 | 0 | 0 | 0 | 0 | 0 | 0 | 0 | 0 | 0 | 0 | 0.118 |
| prepl    | 0 | 0 | 0 | 0 | 0 | 0 | 0 | 0 | 0 | 0 | 0 | 0 | 0.12  |
| hhpl2    | 0 | 0 | 0 | 0 | 0 | 0 | 0 | 0 | 0 | 0 | 0 | 0 | 0.118 |
| cd38     | 0 | 0 | 0 | 0 | 0 | 0 | 0 | 0 | 0 | 0 | 0 | 0 | 0.122 |
| pamr1    | 0 | 0 | 0 | 0 | 0 | 0 | 0 | 0 | 0 | 0 | 0 | 0 | 0.119 |
| mnf1     | 0 | 0 | 0 | 0 | 0 | 0 | 0 | 0 | 0 | 0 | 0 | 0 | 0.118 |
| akap17a  | 0 | 0 | 0 | 0 | 0 | 0 | 0 | 0 | 0 | 0 | 0 | 0 | 0.119 |
| pde9a    | 0 | 0 | 0 | 0 | 0 | 0 | 0 | 0 | 0 | 0 | 0 | 0 | 0.118 |

|         |   |   |   |   |   |   |   |   |   |   |   |   |       |
|---------|---|---|---|---|---|---|---|---|---|---|---|---|-------|
| arih1   | 0 | 0 | 0 | 0 | 0 | 0 | 0 | 0 | 0 | 0 | 0 | 0 | 0.114 |
| gpr65   | 0 | 0 | 0 | 0 | 0 | 0 | 0 | 0 | 0 | 0 | 0 | 0 | 0.116 |
| sh3bp2  | 0 | 0 | 0 | 0 | 0 | 0 | 0 | 0 | 0 | 0 | 0 | 0 | 0.123 |
| rin2    | 0 | 0 | 0 | 0 | 0 | 0 | 0 | 0 | 0 | 0 | 0 | 0 | 0.118 |
| dus2    | 0 | 0 | 0 | 0 | 0 | 0 | 0 | 0 | 0 | 0 | 0 | 0 | 0.117 |
| prep    | 0 | 0 | 0 | 0 | 0 | 0 | 0 | 0 | 0 | 0 | 0 | 0 | 0.121 |
| mvb12b  | 0 | 0 | 0 | 0 | 0 | 0 | 0 | 0 | 0 | 0 | 0 | 0 | 0.122 |
| wdr27   | 0 | 0 | 0 | 0 | 0 | 0 | 0 | 0 | 0 | 0 | 0 | 0 | 0.126 |
| uchl1   | 0 | 0 | 0 | 0 | 0 | 0 | 0 | 0 | 0 | 0 | 0 | 0 | 0.123 |
| htr3a   | 0 | 0 | 0 | 0 | 0 | 0 | 0 | 0 | 0 | 0 | 0 | 0 | 0.123 |
| artn    | 0 | 0 | 0 | 0 | 0 | 0 | 0 | 0 | 0 | 0 | 0 | 0 | 0.125 |
| cnot4   | 0 | 0 | 0 | 0 | 0 | 0 | 0 | 0 | 0 | 0 | 0 | 0 | 0.125 |
| ncapd3  | 0 | 0 | 0 | 0 | 0 | 0 | 0 | 0 | 0 | 0 | 0 | 0 | 0.129 |
| morn2   | 0 | 0 | 0 | 0 | 0 | 0 | 0 | 0 | 0 | 0 | 0 | 0 | 0.127 |
| reep6   | 0 | 0 | 0 | 0 | 0 | 0 | 0 | 0 | 0 | 0 | 0 | 0 | 0.121 |
| vstm2l  | 0 | 0 | 0 | 0 | 0 | 0 | 0 | 0 | 0 | 0 | 0 | 0 | 0.125 |
| mrgrprf | 0 | 0 | 0 | 0 | 0 | 0 | 0 | 0 | 0 | 0 | 0 | 0 | 0.121 |
| nell2   | 0 | 0 | 0 | 0 | 0 | 0 | 0 | 0 | 0 | 0 | 0 | 0 | 0.123 |
| mycbpap | 0 | 0 | 0 | 0 | 0 | 0 | 0 | 0 | 0 | 0 | 0 | 0 | 0.124 |
| pnoc    | 0 | 0 | 0 | 0 | 0 | 0 | 0 | 0 | 0 | 0 | 0 | 0 | 0.121 |
| mme     | 0 | 0 | 0 | 0 | 0 | 0 | 0 | 0 | 0 | 0 | 0 | 0 | 0.114 |
| nmur1   | 0 | 0 | 0 | 0 | 0 | 0 | 0 | 0 | 0 | 0 | 0 | 0 | 0.115 |
| slc50a1 | 0 | 0 | 0 | 0 | 0 | 0 | 0 | 0 | 0 | 0 | 0 | 0 | 0.11  |
| synm    | 0 | 0 | 0 | 0 | 0 | 0 | 0 | 0 | 0 | 0 | 0 | 0 | 0.112 |
| figl2   | 0 | 0 | 0 | 0 | 0 | 0 | 0 | 0 | 0 | 0 | 0 | 0 | 0.11  |
| ms4a7   | 0 | 0 | 0 | 0 | 0 | 0 | 0 | 0 | 0 | 0 | 0 | 0 | 0.116 |
| sdf2l1  | 0 | 0 | 0 | 0 | 0 | 0 | 0 | 0 | 0 | 0 | 0 | 0 | 0.112 |
| opn4    | 0 | 0 | 0 | 0 | 0 | 0 | 0 | 0 | 0 | 0 | 0 | 0 | 0.11  |
| p2ry11  | 0 | 0 | 0 | 0 | 0 | 0 | 0 | 0 | 0 | 0 | 0 | 0 | 0.11  |
| hcn3    | 0 | 0 | 0 | 0 | 0 | 0 | 0 | 0 | 0 | 0 | 0 | 0 | 0.109 |
| anp32c  | 0 | 0 | 0 | 0 | 0 | 0 | 0 | 0 | 0 | 0 | 0 | 0 | 0.11  |
| cmt2g   | 0 | 0 | 0 | 0 | 0 | 0 | 0 | 0 | 0 | 0 | 0 | 0 | 0.107 |
| ywhaq   | 0 | 0 | 0 | 0 | 0 | 0 | 0 | 0 | 0 | 0 | 0 | 0 | 0.116 |
| ms4a4e  | 0 | 0 | 0 | 0 | 0 | 0 | 0 | 0 | 0 | 0 | 0 | 0 | 0.109 |
| kctd12  | 0 | 0 | 0 | 0 | 0 | 0 | 0 | 0 | 0 | 0 | 0 | 0 | 0.112 |
| mea1    | 0 | 0 | 0 | 0 | 0 | 0 | 0 | 0 | 0 | 0 | 0 | 0 | 0.156 |
| lrch3   | 0 | 0 | 0 | 0 | 0 | 0 | 0 | 0 | 0 | 0 | 0 | 0 | 0.114 |
| htr4    | 0 | 0 | 0 | 0 | 0 | 0 | 0 | 0 | 0 | 0 | 0 | 0 | 0.113 |
| or1e3   | 0 | 0 | 0 | 0 | 0 | 0 | 0 | 0 | 0 | 0 | 0 | 0 | 0.113 |
| brd7p3  | 0 | 0 | 0 | 0 | 0 | 0 | 0 | 0 | 0 | 0 | 0 | 0 | 0.115 |
| atg4c   | 0 | 0 | 0 | 0 | 0 | 0 | 0 | 0 | 0 | 0 | 0 | 0 | 0.113 |

|          |   |   |   |   |   |   |   |   |   |   |   |   |       |
|----------|---|---|---|---|---|---|---|---|---|---|---|---|-------|
| hck      | 0 | 0 | 0 | 0 | 0 | 0 | 0 | 0 | 0 | 0 | 0 | 0 | 0.121 |
| nibr     | 0 | 0 | 0 | 0 | 0 | 0 | 0 | 0 | 0 | 0 | 0 | 0 | 0.113 |
| ube2l3   | 0 | 0 | 0 | 0 | 0 | 0 | 0 | 0 | 0 | 0 | 0 | 0 | 0.113 |
| hdhd1p1  | 0 | 0 | 0 | 0 | 0 | 0 | 0 | 0 | 0 | 0 | 0 | 0 | 0.112 |
| hdhd1p2  | 0 | 0 | 0 | 0 | 0 | 0 | 0 | 0 | 0 | 0 | 0 | 0 | 0.112 |
| cap2     | 0 | 0 | 0 | 0 | 0 | 0 | 0 | 0 | 0 | 0 | 0 | 0 | 0.113 |
| htr3c    | 0 | 0 | 0 | 0 | 0 | 0 | 0 | 0 | 0 | 0 | 0 | 0 | 0.111 |
| calca    | 0 | 0 | 0 | 0 | 0 | 0 | 0 | 0 | 0 | 0 | 0 | 0 | 0.111 |
| ntsr2    | 0 | 0 | 0 | 0 | 0 | 0 | 0 | 0 | 0 | 0 | 0 | 0 | 0.127 |
| mehmo    | 0 | 0 | 0 | 0 | 0 | 0 | 0 | 0 | 0 | 0 | 0 | 0 | 0.111 |
| slc17a6  | 0 | 0 | 0 | 0 | 0 | 0 | 0 | 0 | 0 | 0 | 0 | 0 | 0.146 |
| cpne2    | 0 | 0 | 0 | 0 | 0 | 0 | 0 | 0 | 0 | 0 | 0 | 0 | 0.146 |
| ncapg2   | 0 | 0 | 0 | 0 | 0 | 0 | 0 | 0 | 0 | 0 | 0 | 0 | 0.15  |
| psmd1    | 0 | 0 | 0 | 0 | 0 | 0 | 0 | 0 | 0 | 0 | 0 | 0 | 0.151 |
| rbmxp1   | 0 | 0 | 0 | 0 | 0 | 0 | 0 | 0 | 0 | 0 | 0 | 0 | 0.149 |
| grp      | 0 | 0 | 0 | 0 | 0 | 0 | 0 | 0 | 0 | 0 | 0 | 0 | 0.149 |
| mageb4   | 0 | 0 | 0 | 0 | 0 | 0 | 0 | 0 | 0 | 0 | 0 | 0 | 0.146 |
| ube2g1   | 0 | 0 | 0 | 0 | 0 | 0 | 0 | 0 | 0 | 0 | 0 | 0 | 0.147 |
| setd8p1  | 0 | 0 | 0 | 0 | 0 | 0 | 0 | 0 | 0 | 0 | 0 | 0 | 0.142 |
| pcl0     | 0 | 0 | 0 | 0 | 0 | 0 | 0 | 0 | 0 | 0 | 0 | 0 | 0.142 |
| npff     | 0 | 0 | 0 | 0 | 0 | 0 | 0 | 0 | 0 | 0 | 0 | 0 | 0.141 |
| asx1     | 0 | 0 | 0 | 0 | 0 | 0 | 0 | 0 | 0 | 0 | 0 | 0 | 0.144 |
| setbp1   | 0 | 0 | 0 | 0 | 0 | 0 | 0 | 0 | 0 | 0 | 0 | 0 | 0.149 |
| dgcr14   | 0 | 0 | 0 | 0 | 0 | 0 | 0 | 0 | 0 | 0 | 0 | 0 | 0.148 |
| psd3     | 0 | 0 | 0 | 0 | 0 | 0 | 0 | 0 | 0 | 0 | 0 | 0 | 0.152 |
| galr2    | 0 | 0 | 0 | 0 | 0 | 0 | 0 | 0 | 0 | 0 | 0 | 0 | 0.154 |
| anp32d   | 0 | 0 | 0 | 0 | 0 | 0 | 0 | 0 | 0 | 0 | 0 | 0 | 0.157 |
| tcn2     | 0 | 0 | 0 | 0 | 0 | 0 | 0 | 0 | 0 | 0 | 0 | 0 | 0.154 |
| smu1     | 0 | 0 | 0 | 0 | 0 | 0 | 0 | 0 | 0 | 0 | 0 | 0 | 0.158 |
| wdr19    | 0 | 0 | 0 | 0 | 0 | 0 | 0 | 0 | 0 | 0 | 0 | 0 | 0.128 |
| upk1a    | 0 | 0 | 0 | 0 | 0 | 0 | 0 | 0 | 0 | 0 | 0 | 0 | 0.154 |
| c14orf23 | 0 | 0 | 0 | 0 | 0 | 0 | 0 | 0 | 0 | 0 | 0 | 0 | 0.154 |
| galr1    | 0 | 0 | 0 | 0 | 0 | 0 | 0 | 0 | 0 | 0 | 0 | 0 | 0.152 |
| or51e2   | 0 | 0 | 0 | 0 | 0 | 0 | 0 | 0 | 0 | 0 | 0 | 0 | 0.152 |
| scn9a    | 0 | 0 | 0 | 0 | 0 | 0 | 0 | 0 | 0 | 0 | 0 | 0 | 0.152 |
| c4orf19  | 0 | 0 | 0 | 0 | 0 | 0 | 0 | 0 | 0 | 0 | 0 | 0 | 0.154 |
| cuedc1   | 0 | 0 | 0 | 0 | 0 | 0 | 0 | 0 | 0 | 0 | 0 | 0 | 0.154 |
| dgcr7    | 0 | 0 | 0 | 0 | 0 | 0 | 0 | 0 | 0 | 0 | 0 | 0 | 0.139 |
| ints4    | 0 | 0 | 0 | 0 | 0 | 0 | 0 | 0 | 0 | 0 | 0 | 0 | 0.152 |
| ecel1    | 0 | 0 | 0 | 0 | 0 | 0 | 0 | 0 | 0 | 0 | 0 | 0 | 0.13  |
| or7e21p  | 0 | 0 | 0 | 0 | 0 | 0 | 0 | 0 | 0 | 0 | 0 | 0 | 0.129 |

|         |   |   |   |   |   |   |   |   |   |   |   |   |       |
|---------|---|---|---|---|---|---|---|---|---|---|---|---|-------|
| gsc2    | 0 | 0 | 0 | 0 | 0 | 0 | 0 | 0 | 0 | 0 | 0 | 0 | 0.13  |
| capzb   | 0 | 0 | 0 | 0 | 0 | 0 | 0 | 0 | 0 | 0 | 0 | 0 | 0.135 |
| kif13b  | 0 | 0 | 0 | 0 | 0 | 0 | 0 | 0 | 0 | 0 | 0 | 0 | 0.135 |
| chmp7   | 0 | 0 | 0 | 0 | 0 | 0 | 0 | 0 | 0 | 0 | 0 | 0 | 0.134 |
| il31    | 0 | 0 | 0 | 0 | 0 | 0 | 0 | 0 | 0 | 0 | 0 | 0 | 0.128 |
| sdcbp2  | 0 | 0 | 0 | 0 | 0 | 0 | 0 | 0 | 0 | 0 | 0 | 0 | 0.128 |
| sct     | 0 | 0 | 0 | 0 | 0 | 0 | 0 | 0 | 0 | 0 | 0 | 0 | 0.139 |
| myof    | 0 | 0 | 0 | 0 | 0 | 0 | 0 | 0 | 0 | 0 | 0 | 0 | 0.127 |
| nkx6-3  | 0 | 0 | 0 | 0 | 0 | 0 | 0 | 0 | 0 | 0 | 0 | 0 | 0.125 |
| grpr    | 0 | 0 | 0 | 0 | 0 | 0 | 0 | 0 | 0 | 0 | 0 | 0 | 0.128 |
| mageb3  | 0 | 0 | 0 | 0 | 0 | 0 | 0 | 0 | 0 | 0 | 0 | 0 | 0.127 |
| htr3d   | 0 | 0 | 0 | 0 | 0 | 0 | 0 | 0 | 0 | 0 | 0 | 0 | 0.132 |
| cacna1h | 0 | 0 | 0 | 0 | 0 | 0 | 0 | 0 | 0 | 0 | 0 | 0 | 0.128 |
| slc18a3 | 0 | 0 | 0 | 0 | 0 | 0 | 0 | 0 | 0 | 0 | 0 | 0 | 0.137 |
| echs1   | 0 | 0 | 0 | 0 | 0 | 0 | 0 | 0 | 0 | 0 | 0 | 0 | 0.139 |
| pxt1    | 0 | 0 | 0 | 0 | 0 | 0 | 0 | 0 | 0 | 0 | 0 | 0 | 0.137 |
| bnc1    | 0 | 0 | 0 | 0 | 0 | 0 | 0 | 0 | 0 | 0 | 0 | 0 | 0.14  |
| tspan11 | 0 | 0 | 0 | 0 | 0 | 0 | 0 | 0 | 0 | 0 | 0 | 0 | 0.141 |
| foxs1   | 0 | 0 | 0 | 0 | 0 | 0 | 0 | 0 | 0 | 0 | 0 | 0 | 0.134 |
| slc35b1 | 0 | 0 | 0 | 0 | 0 | 0 | 0 | 0 | 0 | 0 | 0 | 0 | 0.137 |
| hla-x   | 0 | 0 | 0 | 0 | 0 | 0 | 0 | 0 | 0 | 0 | 0 | 0 | 0.139 |
| tas2r43 | 0 | 0 | 0 | 0 | 0 | 0 | 0 | 0 | 0 | 0 | 0 | 0 | 0.135 |
| jakmip3 | 0 | 0 | 0 | 0 | 0 | 0 | 0 | 0 | 0 | 0 | 0 | 0 | 0.137 |
| tlx2    | 0 | 0 | 0 | 0 | 0 | 0 | 0 | 0 | 0 | 0 | 0 | 0 | 0.134 |
| galr3   | 0 | 0 | 0 | 0 | 0 | 0 | 0 | 0 | 0 | 0 | 0 | 0 | 0.138 |
