# Supplementary material for: The RXFP3 receptor is functionally associated with cellular responses to oxidative stress and DNA damage
Source: publisher site journal article supplement (doi:10.18632/aging.102528), 2019-12-03
Supplement: Supplementary file [file aging-v11i23-102528-supplementary-material-SD10.pdf]

**Table S9. Concatenated GIT2 signaling theoretical data set.** Biomedical text word items, *i.e.* Gene Symbols, associated with both GIT2 and Cellular Signaling extraction terms are represented. Hence the concatenation of GIT2 with Cell Signaling protein sets results in the theoretical 'GIT2-Signaling' dataset. All proteins identified possess a Cosine Similarity score of association with the interrogator term of >0.1.

| Gene Symbol | GIT2  | GIT-2 | CAT-2 | CAT2  | Cat2  | Cat-2 | Git2  | Git-2 | ARF<br>GAP<br>GIT2 | CAT2  | Cool-<br>interacting<br>tyrosine<br>phosphorylated<br>protein 2 | Cool-interacting<br>protein 2 |
|-------------|-------|-------|-------|-------|-------|-------|-------|-------|--------------------|-------|-----------------------------------------------------------------|-------------------------------|
| ajuba       | 0.489 | 0     | 0     | 0     | 0     | 0     | 0.489 | 0     | 0.483              | 0     | 0.626                                                           | 0.625                         |
| abi3        | 0.487 | 0     | 0     | 0     | 0     | 0     | 0.487 | 0     | 0.482              | 0     | 0.464                                                           | 0.462                         |
| pak6        | 0.385 | 0     | 0     | 0     | 0     | 0     | 0.385 | 0     | 0.38               | 0     | 0.549                                                           | 0.549                         |
| arhgap8     | 0.412 | 0     | 0     | 0     | 0     | 0     | 0.412 | 0     | 0.411              | 0     | 0.452                                                           | 0.451                         |
| map4k4      | 0.37  | 0     | 0     | 0     | 0     | 0     | 0.37  | 0     | 0.363              | 0     | 0.498                                                           | 0.497                         |
| tgfb11      | 0.412 | 0     | 0     | 0     | 0     | 0     | 0.412 | 0     | 0.409              | 0     | 0.377                                                           | 0.376                         |
| sorbs1      | 0.309 | 0     | 0     | 0     | 0     | 0     | 0.309 | 0     | 0.309              | 0     | 0.265                                                           | 0.263                         |
| asap1       | 0.335 | 0     | 0     | 0     | 0     | 0     | 0.335 | 0     | 0.337              | 0     | 0.271                                                           | 0.269                         |
| ppfia1      | 0.346 | 0     | 0     | 0     | 0     | 0     | 0.346 | 0     | 0.342              | 0     | 0.419                                                           | 0.418                         |
| dnajc27     | 0.328 | 0     | 0     | 0     | 0     | 0     | 0.328 | 0     | 0.325              | 0     | 0.377                                                           | 0.375                         |
| capn5       | 0.297 | 0     | 0     | 0     | 0     | 0     | 0.297 | 0     | 0.293              | 0     | 0.397                                                           | 0.397                         |
| nudt16l1    | 0.242 | 0     | 0     | 0.139 | 0.139 | 0     | 0.242 | 0     | 0.236              | 0.139 | 0.253                                                           | 0.252                         |
| slk         | 0.289 | 0     | 0     | 0     | 0     | 0     | 0.289 | 0     | 0.288              | 0     | 0.375                                                           | 0.372                         |
| crkl        | 0.244 | 0     | 0     | 0     | 0     | 0     | 0.244 | 0     | 0.24               | 0     | 0.171                                                           | 0.169                         |
| rapgef1     | 0.243 | 0     | 0     | 0     | 0     | 0     | 0.243 | 0     | 0.241              | 0     | 0.15                                                            | 0.148                         |
| cyth4       | 0.327 | 0     | 0     | 0     | 0     | 0     | 0.327 | 0     | 0.328              | 0     | 0.302                                                           | 0.3                           |
| rsf1        | 0.248 | 0     | 0     | 0     | 0     | 0     | 0.248 | 0     | 0.25               | 0     | 0.371                                                           | 0.37                          |
| c17orf62    | 0.252 | 0     | 0     | 0     | 0     | 0     | 0.252 | 0     | 0.252              | 0     | 0.346                                                           | 0.345                         |
| bcar3       | 0.317 | 0     | 0     | 0     | 0     | 0     | 0.317 | 0     | 0.311              | 0     | 0.187                                                           | 0.185                         |
| ipcef1      | 0.306 | 0     | 0     | 0     | 0     | 0     | 0.306 | 0     | 0.308              | 0     | 0.252                                                           | 0.25                          |
| map4k1      | 0.26  | 0     | 0     | 0     | 0     | 0     | 0.26  | 0     | 0.262              | 0     | 0.236                                                           | 0.234                         |
| sorbs3      | 0.263 | 0     | 0     | 0     | 0     | 0     | 0.263 | 0     | 0.271              | 0     | 0.198                                                           | 0.195                         |
| larp4       | 0.221 | 0     | 0     | 0     | 0     | 0     | 0.221 | 0     | 0.219              | 0     | 0.328                                                           | 0.328                         |
| arhgap42    | 0.257 | 0     | 0     | 0     | 0     | 0     | 0.257 | 0     | 0.264              | 0     | 0.283                                                           | 0.282                         |
| arf1        | 0.334 | 0     | 0     | 0     | 0     | 0     | 0.334 | 0     | 0.351              | 0     | 0.178                                                           | 0.177                         |
| clns1ap1    | 0.198 | 0     | 0     | 0     | 0     | 0     | 0.198 | 0     | 0.197              | 0     | 0.327                                                           | 0.326                         |
| cyth3       | 0.262 | 0     | 0     | 0     | 0     | 0     | 0.262 | 0     | 0.266              | 0     | 0.198                                                           | 0.197                         |
| ephb6       | 0.173 | 0     | 0     | 0     | 0     | 0     | 0.173 | 0     | 0.175              | 0     | 0.101                                                           | 0.1                           |
| arpc5       | 0.266 | 0     | 0     | 0     | 0     | 0     | 0.266 | 0     | 0.264              | 0     | 0.226                                                           | 0.224                         |
| nedd9       | 0.26  | 0     | 0     | 0     | 0     | 0     | 0.26  | 0     | 0.258              | 0     | 0.144                                                           | 0.141                         |
| wash1       | 0.285 | 0     | 0     | 0     | 0     | 0     | 0.285 | 0     | 0.284              | 0     | 0.204                                                           | 0.203                         |
| lpxn        | 0.278 | 0     | 0     | 0     | 0     | 0     | 0.278 | 0     | 0.274              | 0     | 0.197                                                           | 0.195                         |
| copg1       | 0.249 | 0     | 0     | 0     | 0     | 0     | 0.249 | 0     | 0.252              | 0     | 0.236                                                           | 0.235                         |
| svil        | 0.182 | 0     | 0     | 0.136 | 0.136 | 0     | 0.182 | 0     | 0.181              | 0.136 | 0.164                                                           | 0.162                         |

|           |       |      |       |       |       |       |       |      |       |       |       |       |
|-----------|-------|------|-------|-------|-------|-------|-------|------|-------|-------|-------|-------|
| fam21c    | 0.255 | 0    | 0     | 0     | 0     | 0     | 0.255 | 0    | 0.253 | 0     | 0.187 | 0.186 |
| abi3bp    | 0.227 | 0    | 0     | 0     | 0     | 0     | 0.227 | 0    | 0.235 | 0     | 0.236 | 0.235 |
| cpsf6     | 0.168 | 0    | 0     | 0.111 | 0.111 | 0     | 0.168 | 0    | 0.169 | 0.111 | 0.199 | 0.198 |
| rac3      | 0.499 | 0    | 0     | 0     | 0     | 0     | 0.499 | 0    | 0.494 | 0     | 0     | 0     |
| rab11fip3 | 0.258 | 0    | 0     | 0     | 0     | 0     | 0.258 | 0    | 0.255 | 0     | 0.209 | 0.208 |
| cyth2     | 0.291 | 0    | 0     | 0     | 0     | 0     | 0.291 | 0    | 0.294 | 0     | 0.178 | 0.176 |
| arhgef26  | 0.283 | 0    | 0     | 0     | 0     | 0     | 0.283 | 0    | 0.29  | 0     | 0.133 | 0.132 |
| sla       | 0.168 | 0    | 0     | 0     | 0     | 0     | 0.168 | 0    | 0.168 | 0     | 0     | 0     |
| pwp1      | 0.183 | 0    | 0     | 0     | 0     | 0     | 0.183 | 0    | 0.18  | 0     | 0.17  | 0.168 |
| ritpr     | 0.303 | 0    | 0     | 0     | 0     | 0     | 0.303 | 0    | 0.308 | 0     | 0.122 | 0.121 |
| arf3      | 0.193 | 0    | 0     | 0.107 | 0.107 | 0     | 0.193 | 0    | 0.203 | 0.107 | 0.121 | 0.12  |
| dennd1c   | 0.285 | 0    | 0     | 0     | 0     | 0     | 0.285 | 0    | 0.283 | 0     | 0.143 | 0.142 |
| abi2      | 0.238 | 0    | 0     | 0     | 0     | 0     | 0.238 | 0    | 0.237 | 0     | 0.177 | 0.176 |
| arap3     | 0.213 | 0    | 0     | 0     | 0     | 0     | 0.213 | 0    | 0.217 | 0     | 0.124 | 0.122 |
| mtss1     | 0.265 | 0    | 0     | 0     | 0     | 0     | 0.265 | 0    | 0.268 | 0     | 0.16  | 0.159 |
| cyp20a1   | 0     | 0    | 0.267 | 0.263 | 0.263 | 0.267 | 0     | 0    | 0     | 0.263 | 0     | 0     |
| map4k5    | 0.191 | 0    | 0     | 0     | 0     | 0     | 0.191 | 0    | 0.188 | 0     | 0.139 | 0.138 |
| rasl11a   | 0.212 | 0    | 0     | 0     | 0     | 0     | 0.212 | 0    | 0.212 | 0     | 0.19  | 0.189 |
| c16orf70  | 0.155 | 0    | 0     | 0     | 0     | 0     | 0.155 | 0    | 0.158 | 0     | 0.121 | 0.119 |
| snx21     | 0.261 | 0    | 0     | 0     | 0     | 0     | 0.261 | 0    | 0.262 | 0     | 0.127 | 0.125 |
| spry2     | 0.128 | 0    | 0     | 0     | 0     | 0     | 0.128 | 0    | 0.127 | 0     | 0     | 0     |
| sh2d3c    | 0.231 | 0    | 0     | 0     | 0     | 0     | 0.231 | 0    | 0.228 | 0     | 0.13  | 0.128 |
| bin3      | 0.305 | 0    | 0     | 0     | 0     | 0     | 0.305 | 0    | 0.307 | 0     | 0.114 | 0.113 |
| rap1gap   | 0.248 | 0    | 0     | 0     | 0     | 0     | 0.248 | 0    | 0.251 | 0     | 0.113 | 0.112 |
| dok1      | 0.216 | 0    | 0     | 0     | 0     | 0     | 0.216 | 0    | 0.219 | 0     | 0.168 | 0.164 |
| txnl4a    | 0     | 0    | 0.201 | 0.279 | 0.279 | 0.201 | 0     | 0    | 0     | 0.279 | 0     | 0     |
| marcks    | 0.21  | 0.21 | 0     | 0.133 | 0.133 | 0     | 0.21  | 0.21 | 0     | 0.133 | 0     | 0     |
| enah      | 0.249 | 0    | 0     | 0     | 0     | 0     | 0.249 | 0    | 0.26  | 0     | 0.135 | 0.133 |
| ct45a3    | 0     | 0    | 0.222 | 0.264 | 0.264 | 0.222 | 0     | 0    | 0     | 0.264 | 0     | 0     |
| ct45a4    | 0     | 0    | 0.222 | 0.264 | 0.264 | 0.222 | 0     | 0    | 0     | 0.264 | 0     | 0     |
| ct45a5    | 0     | 0    | 0.222 | 0.264 | 0.264 | 0.222 | 0     | 0    | 0     | 0.264 | 0     | 0     |
| ct45a6    | 0     | 0    | 0.222 | 0.264 | 0.264 | 0.222 | 0     | 0    | 0     | 0.264 | 0     | 0     |
| ct45b1p   | 0     | 0    | 0.222 | 0.264 | 0.264 | 0.222 | 0     | 0    | 0     | 0.264 | 0     | 0     |
| ct60      | 0     | 0    | 0.222 | 0.264 | 0.264 | 0.222 | 0     | 0    | 0     | 0.264 | 0     | 0     |
| ct62      | 0     | 0    | 0.222 | 0.264 | 0.264 | 0.222 | 0     | 0    | 0     | 0.264 | 0     | 0     |
| ct64      | 0     | 0    | 0.222 | 0.264 | 0.264 | 0.222 | 0     | 0    | 0     | 0.264 | 0     | 0     |
| psmc4     | 0     | 0    | 0.216 | 0.268 | 0.268 | 0.216 | 0     | 0    | 0     | 0.268 | 0     | 0     |
| exoc6b    | 0.215 | 0    | 0     | 0.117 | 0.117 | 0     | 0.215 | 0    | 0.221 | 0.117 | 0.116 | 0.115 |
| agap1     | 0.228 | 0    | 0     | 0     | 0     | 0     | 0.228 | 0    | 0.237 | 0     | 0.138 | 0.137 |
| vav3      | 0.299 | 0    | 0     | 0     | 0     | 0     | 0.299 | 0    | 0.3   | 0     | 0.115 | 0.114 |
| ctbp1     | 0.154 | 0    | 0     | 0     | 0     | 0     | 0.154 | 0    | 0.156 | 0     | 0.223 | 0.222 |

|          |       |   |       |       |       |       |       |   |       |       |       |       |
|----------|-------|---|-------|-------|-------|-------|-------|---|-------|-------|-------|-------|
| hmgb1    | 0.164 | 0 | 0     | 0     | 0     | 0     | 0.164 | 0 | 0.162 | 0     | 0.222 | 0.222 |
| tnik     | 0.16  | 0 | 0     | 0     | 0     | 0     | 0.16  | 0 | 0.156 | 0     | 0.192 | 0.191 |
| snx33    | 0.17  | 0 | 0     | 0     | 0     | 0     | 0.17  | 0 | 0.171 | 0     | 0.191 | 0.189 |
| tceal3   | 0.164 | 0 | 0     | 0     | 0     | 0     | 0.164 | 0 | 0.168 | 0     | 0.144 | 0.143 |
| sh3pxd2b | 0.175 | 0 | 0     | 0     | 0     | 0     | 0.175 | 0 | 0.175 | 0     | 0.162 | 0.16  |
| raver1   | 0.209 | 0 | 0     | 0     | 0     | 0     | 0.209 | 0 | 0.221 | 0     | 0.153 | 0.152 |
| zyx      | 0.238 | 0 | 0     | 0     | 0     | 0     | 0.238 | 0 | 0.24  | 0     | 0.119 | 0.118 |
| stat5b   | 0.134 | 0 | 0     | 0     | 0     | 0     | 0.134 | 0 | 0.133 | 0     | 0.207 | 0.205 |
| pdcd10   | 0.182 | 0 | 0     | 0     | 0     | 0     | 0.182 | 0 | 0.19  | 0     | 0.185 | 0.184 |
| elf1ax   | 0.185 | 0 | 0     | 0     | 0     | 0     | 0.185 | 0 | 0.183 | 0     | 0.192 | 0.191 |
| rap2a    | 0.186 | 0 | 0     | 0     | 0     | 0     | 0.186 | 0 | 0.19  | 0     | 0.136 | 0.135 |
| igfn1    | 0.176 | 0 | 0     | 0     | 0     | 0     | 0.176 | 0 | 0.173 | 0     | 0.109 | 0.108 |
| swap70   | 0.204 | 0 | 0     | 0     | 0     | 0     | 0.204 | 0 | 0.207 | 0     | 0.142 | 0.14  |
| pikfyve  | 0.176 | 0 | 0     | 0.121 | 0.121 | 0     | 0.176 | 0 | 0.182 | 0.121 | 0     | 0     |
| eea1     | 0.127 | 0 | 0     | 0.147 | 0.147 | 0     | 0.127 | 0 | 0.132 | 0.147 | 0     | 0     |
| myo10    | 0.206 | 0 | 0     | 0     | 0     | 0     | 0.206 | 0 | 0.213 | 0     | 0.118 | 0.117 |
| tbc1d3f  | 0.194 | 0 | 0     | 0     | 0     | 0     | 0.194 | 0 | 0.197 | 0     | 0.116 | 0.115 |
| finc     | 0.169 | 0 | 0     | 0     | 0     | 0     | 0.169 | 0 | 0.17  | 0     | 0.158 | 0.157 |
| ap1s1    | 0.166 | 0 | 0     | 0     | 0     | 0     | 0.166 | 0 | 0.168 | 0     | 0.165 | 0.164 |
| ass1     | 0     | 0 | 0.207 | 0.215 | 0.215 | 0.207 | 0     | 0 | 0     | 0.215 | 0     | 0     |
| nf2      | 0.23  | 0 | 0     | 0     | 0     | 0     | 0.23  | 0 | 0.24  | 0     | 0.18  | 0.179 |
| sgsm1    | 0.145 | 0 | 0.164 | 0     | 0     | 0.164 | 0.145 | 0 | 0.155 | 0     | 0     | 0     |
| dimt1    | 0.157 | 0 | 0     | 0     | 0     | 0     | 0.157 | 0 | 0.165 | 0     | 0.131 | 0.128 |
| arfgap3  | 0.181 | 0 | 0     | 0     | 0     | 0     | 0.181 | 0 | 0.186 | 0     | 0.116 | 0.115 |
| stk4     | 0.166 | 0 | 0     | 0     | 0     | 0     | 0.166 | 0 | 0.165 | 0     | 0.167 | 0.165 |
| heatr6   | 0.142 | 0 | 0     | 0     | 0     | 0     | 0.142 | 0 | 0.144 | 0     | 0.192 | 0.191 |
| marc2    | 0     | 0 | 0.182 | 0.222 | 0.222 | 0.182 | 0     | 0 | 0     | 0.222 | 0     | 0     |
| plek     | 0.201 | 0 | 0     | 0.108 | 0.108 | 0     | 0.201 | 0 | 0.201 | 0.108 | 0.102 | 0     |
| cygb     | 0     | 0 | 0.193 | 0.145 | 0.145 | 0.193 | 0     | 0 | 0     | 0.145 | 0     | 0     |
| ccd88b   | 0.132 | 0 | 0     | 0     | 0     | 0     | 0.132 | 0 | 0.14  | 0     | 0.167 | 0.166 |
| eps8     | 0.171 | 0 | 0     | 0     | 0     | 0     | 0.171 | 0 | 0.176 | 0     | 0.126 | 0.124 |
| odc1     | 0     | 0 | 0.153 | 0.233 | 0.233 | 0.153 | 0     | 0 | 0     | 0.233 | 0     | 0     |
| ppfia3   | 0.157 | 0 | 0     | 0     | 0     | 0     | 0.157 | 0 | 0.158 | 0     | 0.153 | 0.152 |
| ptma     | 0.187 | 0 | 0     | 0     | 0     | 0     | 0.187 | 0 | 0.192 | 0     | 0.11  | 0.11  |
| ocrl     | 0.121 | 0 | 0     | 0.114 | 0.114 | 0     | 0.121 | 0 | 0.129 | 0.114 | 0     | 0     |
| shd      | 0.159 | 0 | 0     | 0     | 0     | 0     | 0.159 | 0 | 0.164 | 0     | 0.131 | 0.129 |
| she      | 0.159 | 0 | 0     | 0     | 0     | 0     | 0.159 | 0 | 0.164 | 0     | 0.131 | 0.129 |
| vnn3     | 0     | 0 | 0.14  | 0.231 | 0.231 | 0.14  | 0     | 0 | 0     | 0.231 | 0     | 0     |
| arf4     | 0.16  | 0 | 0     | 0     | 0     | 0     | 0.16  | 0 | 0.165 | 0     | 0.122 | 0.122 |
| rgs3     | 0.245 | 0 | 0     | 0     | 0     | 0     | 0.245 | 0 | 0.254 | 0     | 0     | 0     |
| htra3    | 0.117 | 0 | 0     | 0     | 0     | 0     | 0.117 | 0 | 0.119 | 0     | 0.187 | 0.186 |

|          |       |   |       |       |       |       |       |   |       |       |       |       |
|----------|-------|---|-------|-------|-------|-------|-------|---|-------|-------|-------|-------|
| dennd1b  | 0.171 | 0 | 0     | 0     | 0     | 0     | 0.171 | 0 | 0.175 | 0     | 0.116 | 0.115 |
| gfm1     | 0     | 0 | 0.137 | 0.225 | 0.225 | 0.137 | 0     | 0 | 0     | 0.225 | 0     | 0     |
| asl      | 0     | 0 | 0.129 | 0.23  | 0.23  | 0.129 | 0     | 0 | 0     | 0.23  | 0     | 0     |
| gbf1     | 0.239 | 0 | 0     | 0     | 0     | 0     | 0.239 | 0 | 0.247 | 0     | 0.108 | 0.107 |
| aldh16a1 | 0.104 | 0 | 0     | 0     | 0     | 0     | 0.104 | 0 | 0.112 | 0     | 0     | 0     |
| iscu     | 0     | 0 | 0.14  | 0.219 | 0.219 | 0.14  | 0     | 0 | 0     | 0.219 | 0     | 0     |
| tm7sf3   | 0     | 0 | 0.153 | 0.209 | 0.209 | 0.153 | 0     | 0 | 0     | 0.209 | 0     | 0     |
| asb6     | 0.118 | 0 | 0     | 0     | 0     | 0     | 0.118 | 0 | 0.122 | 0     | 0     | 0     |
| gcc2     | 0.141 | 0 | 0     | 0     | 0     | 0     | 0.141 | 0 | 0.149 | 0     | 0.104 | 0.103 |
| bcar4    | 0.146 | 0 | 0     | 0     | 0     | 0     | 0.146 | 0 | 0.141 | 0     | 0.116 | 0.115 |
| sctr     | 0     | 0 | 0     | 0.182 | 0.182 | 0     | 0     | 0 | 0     | 0.182 | 0     | 0     |
| slc43a1  | 0     | 0 | 0.123 | 0.221 | 0.221 | 0.123 | 0     | 0 | 0     | 0.221 | 0     | 0     |
| snx9     | 0.128 | 0 | 0     | 0     | 0     | 0     | 0.128 | 0 | 0.131 | 0     | 0.149 | 0.147 |
| prap1    | 0     | 0 | 0     | 0.3   | 0.3   | 0     | 0     | 0 | 0     | 0.3   | 0     | 0     |
| dbn1     | 0.173 | 0 | 0     | 0     | 0     | 0     | 0.173 | 0 | 0.2   | 0     | 0.123 | 0.122 |
| bbip1    | 0.135 | 0 | 0     | 0     | 0     | 0     | 0.135 | 0 | 0.151 | 0     | 0.106 | 0.105 |
| cyth1    | 0.219 | 0 | 0     | 0     | 0     | 0     | 0.219 | 0 | 0.22  | 0     | 0.116 | 0.115 |
| camta1   | 0     | 0 | 0.203 | 0.16  | 0.16  | 0.203 | 0     | 0 | 0     | 0.16  | 0     | 0     |
| rhobtb3  | 0.216 | 0 | 0     | 0     | 0     | 0     | 0.216 | 0 | 0.22  | 0     | 0.117 | 0.116 |
| cttnbp2  | 0.186 | 0 | 0     | 0     | 0     | 0     | 0.186 | 0 | 0.187 | 0     | 0.162 | 0.162 |
| phpt1    | 0.125 | 0 | 0     | 0     | 0     | 0     | 0.125 | 0 | 0.127 | 0     | 0.12  | 0.118 |
| cps1     | 0     | 0 | 0.154 | 0.191 | 0.191 | 0.154 | 0     | 0 | 0     | 0.191 | 0     | 0     |
| zfhx4    | 0     | 0 | 0.126 | 0.209 | 0.209 | 0.126 | 0     | 0 | 0     | 0.209 | 0     | 0     |
| tspan13  | 0.292 | 0 | 0     | 0     | 0     | 0     | 0.292 | 0 | 0.292 | 0     | 0     | 0     |
| rab9b    | 0.14  | 0 | 0     | 0     | 0     | 0     | 0.14  | 0 | 0.145 | 0     | 0.113 | 0.111 |
| arl2bp   | 0.212 | 0 | 0     | 0     | 0     | 0     | 0.212 | 0 | 0.232 | 0     | 0.105 | 0.103 |
| fcho2    | 0.183 | 0 | 0     | 0     | 0     | 0     | 0.183 | 0 | 0.192 | 0     | 0.153 | 0.152 |
| arfrp1   | 0.137 | 0 | 0     | 0     | 0     | 0     | 0.137 | 0 | 0.142 | 0     | 0.116 | 0.116 |
| glis     | 0     | 0 | 0.189 | 0.16  | 0.16  | 0.189 | 0     | 0 | 0     | 0.16  | 0     | 0     |
| xdh      | 0     | 0 | 0.174 | 0.17  | 0.17  | 0.174 | 0     | 0 | 0     | 0.17  | 0     | 0     |
| slc30a7  | 0     | 0 | 0.133 | 0.196 | 0.196 | 0.133 | 0     | 0 | 0     | 0.196 | 0     | 0     |
| ppfia4   | 0.174 | 0 | 0     | 0     | 0     | 0     | 0.174 | 0 | 0.176 | 0     | 0.163 | 0.162 |
| klf6     | 0     | 0 | 0.163 | 0.174 | 0.174 | 0.163 | 0     | 0 | 0     | 0.174 | 0     | 0     |
| tuba4a   | 0.17  | 0 | 0     | 0.11  | 0.11  | 0     | 0.17  | 0 | 0.173 | 0.11  | 0     | 0     |
| mir661   | 0     | 0 | 0.156 | 0.177 | 0.177 | 0.156 | 0     | 0 | 0     | 0.177 | 0     | 0     |
| dnm2     | 0.195 | 0 | 0     | 0     | 0     | 0     | 0.195 | 0 | 0.201 | 0     | 0     | 0     |
| usp6nl   | 0.201 | 0 | 0     | 0     | 0     | 0     | 0.201 | 0 | 0.201 | 0     | 0.117 | 0.115 |
| mir132   | 0.148 | 0 | 0     | 0     | 0     | 0     | 0.148 | 0 | 0.145 | 0     | 0.144 | 0.143 |
| tbc1d25  | 0.126 | 0 | 0     | 0.112 | 0.112 | 0     | 0.126 | 0 | 0.137 | 0.112 | 0     | 0     |
| ehf      | 0     | 0 | 0.149 | 0.174 | 0.174 | 0.149 | 0     | 0 | 0     | 0.174 | 0     | 0     |
| exoc5    | 0.197 | 0 | 0     | 0     | 0     | 0     | 0.197 | 0 | 0.2   | 0     | 0.113 | 0.112 |

|         |       |   |       |       |       |       |       |   |       |       |       |       |
|---------|-------|---|-------|-------|-------|-------|-------|---|-------|-------|-------|-------|
| arfgap1 | 0.186 | 0 | 0     | 0     | 0     | 0     | 0.186 | 0 | 0.202 | 0     | 0.119 | 0.118 |
| sh3gl2  | 0.119 | 0 | 0     | 0     | 0     | 0     | 0.119 | 0 | 0.131 | 0     | 0     | 0     |
| me2     | 0     | 0 | 0.178 | 0.15  | 0.15  | 0.178 | 0     | 0 | 0     | 0.15  | 0     | 0     |
| tbc1d14 | 0.126 | 0 | 0     | 0.139 | 0.139 | 0     | 0.126 | 0 | 0.136 | 0.139 | 0     | 0     |
| marc1   | 0     | 0 | 0.147 | 0.169 | 0.169 | 0.147 | 0     | 0 | 0     | 0.169 | 0     | 0     |
| lrrc16b | 0.139 | 0 | 0     | 0.124 | 0.124 | 0     | 0.139 | 0 | 0.143 | 0.124 | 0     | 0     |
| sergef  | 0.159 | 0 | 0     | 0.104 | 0.104 | 0     | 0.159 | 0 | 0.162 | 0.104 | 0     | 0     |
| slc5a6  | 0     | 0 | 0     | 0.178 | 0.178 | 0     | 0     | 0 | 0     | 0.178 | 0     | 0     |
| esx1    | 0     | 0 | 0.124 | 0.178 | 0.178 | 0.124 | 0     | 0 | 0     | 0.178 | 0     | 0     |
| clip1   | 0.144 | 0 | 0     | 0     | 0     | 0     | 0.144 | 0 | 0.147 | 0     | 0.123 | 0.121 |
| dhrs4l2 | 0     | 0 | 0.135 | 0.167 | 0.167 | 0.135 | 0     | 0 | 0     | 0.167 | 0     | 0     |
| pc      | 0     | 0 | 0.133 | 0.168 | 0.168 | 0.133 | 0     | 0 | 0     | 0.168 | 0     | 0     |
| luzp4   | 0     | 0 | 0.175 | 0.14  | 0.14  | 0.175 | 0     | 0 | 0     | 0.14  | 0     | 0     |
| tsnax   | 0     | 0 | 0.127 | 0.172 | 0.172 | 0.127 | 0     | 0 | 0     | 0.172 | 0     | 0     |
| gfm2    | 0     | 0 | 0.125 | 0.173 | 0.173 | 0.125 | 0     | 0 | 0     | 0.173 | 0     | 0     |
| wash2p  | 0.17  | 0 | 0     | 0     | 0     | 0     | 0.17  | 0 | 0.173 | 0     | 0.127 | 0.126 |
| trip6   | 0.162 | 0 | 0     | 0     | 0     | 0     | 0.162 | 0 | 0.164 | 0     | 0     | 0     |
| ccd53   | 0.106 | 0 | 0     | 0     | 0     | 0     | 0.106 | 0 | 0.107 | 0     | 0.104 | 0.102 |
| fyc01   | 0     | 0 | 0     | 0.174 | 0.174 | 0     | 0     | 0 | 0     | 0.174 | 0     | 0     |
| slc3a2  | 0     | 0 | 0.104 | 0.184 | 0.184 | 0.104 | 0     | 0 | 0     | 0.184 | 0     | 0     |
| ctns    | 0     | 0 | 0.109 | 0.179 | 0.179 | 0.109 | 0     | 0 | 0     | 0.179 | 0     | 0     |
| cdki2   | 0     | 0 | 0.105 | 0.107 | 0.107 | 0.105 | 0     | 0 | 0     | 0.107 | 0     | 0     |
| dgkb    | 0.126 | 0 | 0     | 0.118 | 0.118 | 0     | 0.126 | 0 | 0.141 | 0.118 | 0     | 0     |
| elk3    | 0     | 0 | 0.161 | 0.141 | 0.141 | 0.161 | 0     | 0 | 0     | 0.141 | 0     | 0     |
| rab21   | 0.174 | 0 | 0     | 0     | 0     | 0     | 0.174 | 0 | 0.179 | 0     | 0     | 0     |
| magt1   | 0.102 | 0 | 0     | 0.142 | 0.142 | 0     | 0.102 | 0 | 0.103 | 0.142 | 0     | 0     |
| exoc8   | 0.171 | 0 | 0     | 0     | 0     | 0     | 0.171 | 0 | 0.173 | 0     | 0.109 | 0.108 |
| arhgdib | 0.243 | 0 | 0     | 0     | 0     | 0     | 0.243 | 0 | 0.245 | 0     | 0     | 0     |
| rnd1    | 0.241 | 0 | 0     | 0     | 0     | 0     | 0.241 | 0 | 0.244 | 0     | 0     | 0     |
| bcas2   | 0     | 0 | 0     | 0     | 0     | 0     | 0     | 0 | 0     | 0     | 0     | 0     |
| myo1a   | 0.105 | 0 | 0     | 0.133 | 0.133 | 0     | 0.105 | 0 | 0.113 | 0.133 | 0     | 0     |
| slc44a1 | 0     | 0 | 0     | 0.169 | 0.169 | 0     | 0     | 0 | 0     | 0.169 | 0     | 0     |
| arfgf2  | 0.164 | 0 | 0     | 0     | 0     | 0     | 0.164 | 0 | 0.185 | 0     | 0.103 | 0.102 |
| adcy7   | 0     | 0 | 0     | 0.237 | 0.237 | 0     | 0     | 0 | 0     | 0.237 | 0     | 0     |
| uqcrq   | 0     | 0 | 0.128 | 0.151 | 0.151 | 0.128 | 0     | 0 | 0     | 0.151 | 0     | 0     |
| rab1b   | 0.234 | 0 | 0     | 0     | 0     | 0     | 0.234 | 0 | 0.238 | 0     | 0     | 0     |
| dusp11  | 0     | 0 | 0.127 | 0.15  | 0.15  | 0.127 | 0     | 0 | 0     | 0.15  | 0     | 0     |
| robo4   | 0.144 | 0 | 0     | 0     | 0     | 0     | 0.144 | 0 | 0.143 | 0     | 0.135 | 0.134 |
| capg    | 0.151 | 0 | 0     | 0     | 0     | 0     | 0.151 | 0 | 0.158 | 0     | 0.119 | 0.118 |
| tmem141 | 0     | 0 | 0     | 0.231 | 0.231 | 0     | 0     | 0 | 0     | 0.231 | 0     | 0     |
| usp34   | 0     | 0 | 0.123 | 0.149 | 0.149 | 0.123 | 0     | 0 | 0     | 0.149 | 0     | 0     |

|           |       |   |       |       |       |       |       |   |       |       |       |       |
|-----------|-------|---|-------|-------|-------|-------|-------|---|-------|-------|-------|-------|
| fblim1    | 0.147 | 0 | 0     | 0     | 0     | 0     | 0.147 | 0 | 0.146 | 0     | 0.127 | 0.125 |
| raph1     | 0.228 | 0 | 0     | 0     | 0     | 0     | 0.228 | 0 | 0.234 | 0     | 0     | 0     |
| trpm6     | 0     | 0 | 0     | 0.23  | 0.23  | 0     | 0     | 0 | 0     | 0.23  | 0     | 0     |
| gcc1      | 0.112 | 0 | 0     | 0     | 0     | 0     | 0.112 | 0 | 0.116 | 0     | 0     | 0     |
| dgkz      | 0.223 | 0 | 0     | 0     | 0     | 0     | 0.223 | 0 | 0.236 | 0     | 0     | 0     |
| tial1     | 0     | 0 | 0.103 | 0.158 | 0.158 | 0.103 | 0     | 0 | 0     | 0.158 | 0     | 0     |
| etf1p2    | 0     | 0 | 0     | 0.126 | 0.126 | 0     | 0     | 0 | 0     | 0.126 | 0     | 0     |
| etf1p3    | 0     | 0 | 0     | 0.126 | 0.126 | 0     | 0     | 0 | 0     | 0.126 | 0     | 0     |
| psat1     | 0     | 0 | 0.11  | 0.153 | 0.153 | 0.11  | 0     | 0 | 0     | 0.153 | 0     | 0     |
| sgjp1     | 0.129 | 0 | 0     | 0     | 0     | 0     | 0.129 | 0 | 0.134 | 0     | 0     | 0     |
| mob1b     | 0.152 | 0 | 0     | 0     | 0     | 0     | 0.152 | 0 | 0.155 | 0     | 0.11  | 0.108 |
| slc38a3   | 0     | 0 | 0     | 0.225 | 0.225 | 0     | 0     | 0 | 0     | 0.225 | 0     | 0     |
| iqsec3    | 0.15  | 0 | 0     | 0     | 0     | 0     | 0.15  | 0 | 0.168 | 0     | 0.103 | 0.102 |
| ndufa6    | 0     | 0 | 0.108 | 0.151 | 0.151 | 0.108 | 0     | 0 | 0     | 0.151 | 0     | 0     |
| rpl10     | 0     | 0 | 0     | 0.223 | 0.223 | 0     | 0     | 0 | 0     | 0.223 | 0     | 0     |
| ndufa12   | 0     | 0 | 0.116 | 0.145 | 0.145 | 0.116 | 0     | 0 | 0     | 0.145 | 0     | 0     |
| ppp1r42   | 0.145 | 0 | 0     | 0     | 0     | 0     | 0.145 | 0 | 0.151 | 0     | 0.114 | 0.112 |
| vps26b    | 0.101 | 0 | 0     | 0.119 | 0.119 | 0     | 0.101 | 0 | 0.103 | 0.119 | 0     | 0     |
| dnm3      | 0.141 | 0 | 0     | 0     | 0     | 0     | 0.141 | 0 | 0.161 | 0     | 0     | 0     |
| khdrbs1   | 0.134 | 0 | 0     | 0     | 0     | 0     | 0.134 | 0 | 0.14  | 0     | 0.126 | 0.124 |
| katnb1    | 0.131 | 0 | 0     | 0     | 0     | 0     | 0.131 | 0 | 0.133 | 0     | 0.13  | 0.128 |
| s100a11   | 0     | 0 | 0     | 0.217 | 0.217 | 0     | 0     | 0 | 0     | 0.217 | 0     | 0     |
| copz2     | 0.146 | 0 | 0     | 0     | 0     | 0     | 0.146 | 0 | 0.148 | 0     | 0.105 | 0.104 |
| pdcd6     | 0     | 0 | 0     | 0.126 | 0.126 | 0     | 0     | 0 | 0     | 0.126 | 0     | 0     |
| ppfia2    | 0.138 | 0 | 0     | 0     | 0     | 0     | 0.138 | 0 | 0.14  | 0     | 0.112 | 0.111 |
| katna1    | 0.132 | 0 | 0     | 0     | 0     | 0     | 0.132 | 0 | 0.135 | 0     | 0.12  | 0.118 |
| zc4h2     | 0.132 | 0 | 0     | 0     | 0     | 0     | 0.132 | 0 | 0.131 | 0     | 0.12  | 0.119 |
| mtmr6     | 0.122 | 0 | 0     | 0     | 0     | 0     | 0.122 | 0 | 0.13  | 0     | 0     | 0     |
| elf3b     | 0.108 | 0 | 0     | 0     | 0     | 0     | 0.108 | 0 | 0.113 | 0     | 0     | 0     |
| hgsnat    | 0     | 0 | 0.148 | 0.111 | 0.111 | 0.148 | 0     | 0 | 0     | 0.111 | 0     | 0     |
| supv31    | 0     | 0 | 0     | 0.209 | 0.209 | 0     | 0     | 0 | 0     | 0.209 | 0     | 0     |
| clint1    | 0.128 | 0 | 0     | 0     | 0     | 0     | 0.128 | 0 | 0.135 | 0     | 0.117 | 0.115 |
| rab11fip4 | 0.137 | 0 | 0     | 0     | 0     | 0     | 0.137 | 0 | 0.138 | 0     | 0.106 | 0.105 |
| jmjd6     | 0.138 | 0 | 0     | 0     | 0     | 0     | 0.138 | 0 | 0.135 | 0     | 0.104 | 0.103 |
| gpr27     | 0     | 0 | 0     | 0.114 | 0.114 | 0     | 0     | 0 | 0     | 0.114 | 0     | 0     |
| mapk7     | 0.111 | 0 | 0     | 0     | 0     | 0     | 0.111 | 0 | 0.128 | 0     | 0     | 0     |
| njp7      | 0.122 | 0 | 0.117 | 0     | 0     | 0.117 | 0.122 | 0 | 0.133 | 0     | 0     | 0     |
| march5    | 0.102 | 0 | 0     | 0     | 0     | 0     | 0.102 | 0 | 0.112 | 0     | 0.147 | 0.147 |
| cabp7     | 0     | 0 | 0     | 0.202 | 0.202 | 0     | 0     | 0 | 0     | 0.202 | 0     | 0     |
| gapvd1    | 0     | 0 | 0     | 0     | 0     | 0     | 0     | 0 | 0     | 0     | 0     | 0     |
| glul      | 0     | 0 | 0.101 | 0.134 | 0.134 | 0.101 | 0     | 0 | 0     | 0.134 | 0     | 0     |

|           |       |   |       |       |       |       |       |   |       |       |       |       |
|-----------|-------|---|-------|-------|-------|-------|-------|---|-------|-------|-------|-------|
| sgk3      | 0     | 0 | 0     | 0.201 | 0.201 | 0     | 0     | 0 | 0     | 0.201 | 0     | 0     |
| spata6    | 0     | 0 | 0     | 0.167 | 0.167 | 0     | 0     | 0 | 0.101 | 0.167 | 0     | 0     |
| impdh1p11 | 0     | 0 | 0     | 0.123 | 0.123 | 0     | 0     | 0 | 0     | 0.123 | 0     | 0     |
| kcnk13    | 0     | 0 | 0     | 0.2   | 0.2   | 0     | 0     | 0 | 0     | 0.2   | 0     | 0     |
| lphn2     | 0.128 | 0 | 0     | 0     | 0     | 0     | 0.128 | 0 | 0.13  | 0     | 0     | 0     |
| gulop     | 0     | 0 | 0.126 | 0.115 | 0.115 | 0.126 | 0     | 0 | 0     | 0.115 | 0     | 0     |
| slc23a1   | 0     | 0 | 0     | 0.199 | 0.199 | 0     | 0     | 0 | 0     | 0.199 | 0     | 0     |
| s1pr5     | 0.198 | 0 | 0     | 0     | 0     | 0     | 0.198 | 0 | 0.197 | 0     | 0     | 0     |
| dmkn      | 0.112 | 0 | 0     | 0     | 0     | 0     | 0.112 | 0 | 0.114 | 0     | 0.126 | 0.125 |
| tmem217   | 0.102 | 0 | 0     | 0     | 0     | 0     | 0.102 | 0 | 0.119 | 0     | 0     | 0     |
| anxa6     | 0     | 0 | 0     | 0.196 | 0.196 | 0     | 0     | 0 | 0     | 0.196 | 0     | 0     |
| ptpn20b   | 0.116 | 0 | 0     | 0     | 0     | 0     | 0.116 | 0 | 0.119 | 0     | 0     | 0     |
| ssx2jp    | 0.194 | 0 | 0     | 0     | 0     | 0     | 0.194 | 0 | 0.198 | 0     | 0     | 0     |
| casin1    | 0.123 | 0 | 0     | 0     | 0     | 0     | 0.123 | 0 | 0.126 | 0     | 0.104 | 0.103 |
| glud1     | 0     | 0 | 0     | 0.193 | 0.193 | 0     | 0     | 0 | 0     | 0.193 | 0     | 0     |
| lcp1      | 0.122 | 0 | 0     | 0     | 0     | 0     | 0.122 | 0 | 0.123 | 0     | 0.107 | 0.105 |
| gpsm3     | 0.192 | 0 | 0     | 0     | 0     | 0     | 0.192 | 0 | 0.193 | 0     | 0     | 0     |
| ruvbl2    | 0.108 | 0 | 0     | 0     | 0     | 0     | 0.108 | 0 | 0.109 | 0     | 0.126 | 0.126 |
| sipa1     | 0.191 | 0 | 0     | 0     | 0     | 0     | 0.191 | 0 | 0.194 | 0     | 0     | 0     |
| hrh4      | 0     | 0 | 0     | 0.114 | 0.114 | 0     | 0     | 0 | 0     | 0.114 | 0     | 0     |
| eri2      | 0     | 0 | 0     | 0     | 0     | 0     | 0     | 0 | 0     | 0     | 0     | 0     |
| fcho1     | 0.185 | 0 | 0     | 0     | 0     | 0     | 0.185 | 0 | 0.197 | 0     | 0     | 0     |
| acadl     | 0     | 0 | 0.106 | 0.117 | 0.117 | 0.106 | 0     | 0 | 0     | 0.117 | 0     | 0     |
| pea15     | 0.187 | 0 | 0     | 0     | 0     | 0     | 0.187 | 0 | 0.189 | 0     | 0     | 0     |
| arhgap22  | 0.186 | 0 | 0     | 0     | 0     | 0     | 0.186 | 0 | 0.186 | 0     | 0     | 0     |
| stk38     | 0.117 | 0 | 0     | 0     | 0     | 0     | 0.117 | 0 | 0.119 | 0     | 0.102 | 0.1   |
| acly      | 0     | 0 | 0.1   | 0.117 | 0.117 | 0.1   | 0     | 0 | 0     | 0.117 | 0     | 0     |
| igkv1d-17 | 0.107 | 0 | 0     | 0     | 0     | 0     | 0.107 | 0 | 0.11  | 0     | 0.113 | 0.112 |
| tes       | 0     | 0 | 0     | 0.103 | 0.103 | 0     | 0     | 0 | 0     | 0.103 | 0     | 0     |
| acss2     | 0     | 0 | 0     | 0.182 | 0.182 | 0     | 0     | 0 | 0     | 0.182 | 0     | 0     |
| gsta4     | 0     | 0 | 0.111 | 0.108 | 0.108 | 0.111 | 0     | 0 | 0     | 0.108 | 0     | 0     |
| lpar2     | 0.179 | 0 | 0     | 0     | 0     | 0     | 0.179 | 0 | 0.183 | 0     | 0     | 0     |
| kprp      | 0     | 0 | 0.103 | 0.111 | 0.111 | 0.103 | 0     | 0 | 0     | 0.111 | 0     | 0     |
| arhgap5   | 0.178 | 0 | 0     | 0     | 0     | 0     | 0.178 | 0 | 0.183 | 0     | 0     | 0     |
| map3k9    | 0.103 | 0 | 0     | 0     | 0     | 0     | 0.103 | 0 | 0.103 | 0     | 0.114 | 0.112 |
| gng13     | 0.106 | 0 | 0     | 0     | 0     | 0     | 0.106 | 0 | 0.112 | 0     | 0     | 0     |
| ehd2      | 0.176 | 0 | 0     | 0     | 0     | 0     | 0.176 | 0 | 0.181 | 0     | 0     | 0     |
| slc13a5   | 0     | 0 | 0     | 0.177 | 0.177 | 0     | 0     | 0 | 0     | 0.177 | 0     | 0     |
| acss1     | 0     | 0 | 0     | 0.176 | 0.176 | 0     | 0     | 0 | 0     | 0.176 | 0     | 0     |
| h2bfm     | 0     | 0 | 0     | 0.176 | 0.176 | 0     | 0     | 0 | 0     | 0.176 | 0     | 0     |
| mapre1    | 0.106 | 0 | 0     | 0     | 0     | 0     | 0.106 | 0 | 0.108 | 0     | 0.103 | 0.102 |

|              |       |   |       |       |       |       |       |   |       |       |       |       |
|--------------|-------|---|-------|-------|-------|-------|-------|---|-------|-------|-------|-------|
| vps35        | 0.106 | 0 | 0     | 0     | 0     | 0     | 0.106 | 0 | 0.109 | 0     | 0.102 | 0.101 |
| mir1287      | 0     | 0 | 0.104 | 0.104 | 0.104 | 0.104 | 0     | 0 | 0     | 0.104 | 0     | 0     |
| btd          | 0     | 0 | 0     | 0.173 | 0.173 | 0     | 0     | 0 | 0     | 0.173 | 0     | 0     |
| fam65a       | 0     | 0 | 0     | 0.173 | 0.173 | 0     | 0     | 0 | 0     | 0.173 | 0     | 0     |
| nol12        | 0.168 | 0 | 0     | 0     | 0     | 0     | 0.168 | 0 | 0.182 | 0     | 0     | 0     |
| slc3a1       | 0     | 0 | 0     | 0.17  | 0.17  | 0     | 0     | 0 | 0     | 0.17  | 0     | 0     |
| btg1         | 0     | 0 | 0     | 0.169 | 0.169 | 0     | 0     | 0 | 0     | 0.169 | 0     | 0     |
| usp6         | 0.164 | 0 | 0     | 0     | 0     | 0     | 0.164 | 0 | 0.179 | 0     | 0     | 0     |
| ppp1cb       | 0.168 | 0 | 0     | 0     | 0     | 0     | 0.168 | 0 | 0.169 | 0     | 0     | 0     |
| arcn1        | 0.163 | 0 | 0     | 0     | 0     | 0     | 0.163 | 0 | 0.169 | 0     | 0     | 0     |
| copa         | 0.162 | 0 | 0     | 0     | 0     | 0     | 0.162 | 0 | 0.17  | 0     | 0     | 0     |
| spesp1       | 0     | 0 | 0     | 0.164 | 0.164 | 0     | 0     | 0 | 0     | 0.164 | 0     | 0     |
| arhgef16     | 0.124 | 0 | 0     | 0     | 0     | 0     | 0.124 | 0 | 0.141 | 0     | 0     | 0     |
| capn6        | 0.164 | 0 | 0     | 0     | 0     | 0     | 0.164 | 0 | 0.162 | 0     | 0     | 0     |
| schip1       | 0.161 | 0 | 0     | 0     | 0     | 0     | 0.161 | 0 | 0.167 | 0     | 0     | 0     |
| trip11       | 0.162 | 0 | 0     | 0     | 0     | 0     | 0.162 | 0 | 0.165 | 0     | 0     | 0     |
| bckdhb       | 0     | 0 | 0     | 0.162 | 0.162 | 0     | 0     | 0 | 0     | 0.162 | 0     | 0     |
| nr4a2        | 0     | 0 | 0.243 | 0     | 0     | 0.243 | 0     | 0 | 0     | 0     | 0     | 0     |
| slc1a5       | 0     | 0 | 0     | 0.161 | 0.161 | 0     | 0     | 0 | 0     | 0.161 | 0     | 0     |
| c12orf39     | 0     | 0 | 0     | 0     | 0     | 0     | 0     | 0 | 0     | 0     | 0     | 0     |
| cpne9        | 0     | 0 | 0     | 0.16  | 0.16  | 0     | 0     | 0 | 0     | 0.16  | 0     | 0     |
| edc3         | 0     | 0 | 0     | 0.16  | 0.16  | 0     | 0     | 0 | 0     | 0.16  | 0     | 0     |
| znf644       | 0.158 | 0 | 0     | 0     | 0     | 0     | 0.158 | 0 | 0.159 | 0     | 0     | 0     |
| anxa8l2      | 0     | 0 | 0     | 0.158 | 0.158 | 0     | 0     | 0 | 0     | 0.158 | 0     | 0     |
| ceacam8      | 0     | 0 | 0     | 0.158 | 0.158 | 0     | 0     | 0 | 0     | 0.158 | 0     | 0     |
| c8orf17      | 0     | 0 | 0     | 0     | 0     | 0     | 0     | 0 | 0     | 0     | 0     | 0     |
| rab11fip2    | 0.156 | 0 | 0     | 0     | 0     | 0     | 0.156 | 0 | 0.161 | 0     | 0     | 0     |
| pnpla8       | 0     | 0 | 0     | 0.157 | 0.157 | 0     | 0     | 0 | 0     | 0.157 | 0     | 0     |
| slc23a2      | 0     | 0 | 0     | 0.157 | 0.157 | 0     | 0     | 0 | 0     | 0.157 | 0     | 0     |
| mtif3        | 0.117 | 0 | 0     | 0     | 0     | 0     | 0.117 | 0 | 0.134 | 0     | 0     | 0     |
| c8orf44-sgk3 | 0     | 0 | 0     | 0.156 | 0.156 | 0     | 0     | 0 | 0     | 0.156 | 0     | 0     |
| dennd5a      | 0.154 | 0 | 0     | 0     | 0     | 0     | 0.154 | 0 | 0.16  | 0     | 0     | 0     |
| hint2        | 0     | 0 | 0     | 0.156 | 0.156 | 0     | 0     | 0 | 0     | 0.156 | 0     | 0     |
| txndc2       | 0     | 0 | 0     | 0.156 | 0.156 | 0     | 0     | 0 | 0     | 0.156 | 0     | 0     |
| cpne6        | 0     | 0 | 0     | 0.121 | 0.121 | 0     | 0     | 0 | 0     | 0.121 | 0     | 0     |
| amd1         | 0     | 0 | 0     | 0.154 | 0.154 | 0     | 0     | 0 | 0     | 0.154 | 0     | 0     |
| actn4        | 0.153 | 0 | 0     | 0     | 0     | 0     | 0.153 | 0 | 0.155 | 0     | 0     | 0     |
| mcu          | 0     | 0 | 0     | 0.152 | 0.152 | 0     | 0     | 0 | 0     | 0.152 | 0     | 0     |
| or1d5        | 0     | 0 | 0     | 0.152 | 0.152 | 0     | 0     | 0 | 0     | 0.152 | 0     | 0     |
| pum2         | 0     | 0 | 0     | 0.152 | 0.152 | 0     | 0     | 0 | 0     | 0.152 | 0     | 0     |
| actn2        | 0.15  | 0 | 0     | 0     | 0     | 0     | 0.15  | 0 | 0.154 | 0     | 0     | 0     |



|            |       |   |      |       |       |      |       |   |       |       |      |       |
|------------|-------|---|------|-------|-------|------|-------|---|-------|-------|------|-------|
| scamp3     | 0     | 0 | 0    | 0     | 0     | 0    | 0     | 0 | 0     | 0     | 0    | 0     |
| gucy2gp    | 0     | 0 | 0    | 0.151 | 0.151 | 0    | 0     | 0 | 0     | 0.151 | 0    | 0     |
| nudt16     | 0     | 0 | 0    | 0.151 | 0.151 | 0    | 0     | 0 | 0     | 0.151 | 0    | 0     |
| rab20      | 0     | 0 | 0    | 0.105 | 0.105 | 0    | 0     | 0 | 0.137 | 0.105 | 0    | 0     |
| cpd        | 0     | 0 | 0    | 0.15  | 0.15  | 0    | 0     | 0 | 0     | 0.15  | 0    | 0     |
| nme9       | 0     | 0 | 0    | 0.15  | 0.15  | 0    | 0     | 0 | 0     | 0.15  | 0    | 0     |
| rasgef1b   | 0     | 0 | 0    | 0.15  | 0.15  | 0    | 0     | 0 | 0     | 0.15  | 0    | 0     |
| adam12-ot1 | 0     | 0 | 0    | 0.149 | 0.149 | 0    | 0     | 0 | 0     | 0.149 | 0    | 0     |
| lcn1       | 0     | 0 | 0    | 0.149 | 0.149 | 0    | 0     | 0 | 0     | 0.149 | 0    | 0     |
| sept14     | 0.148 | 0 | 0    | 0     | 0     | 0    | 0.148 | 0 | 0.15  | 0     | 0    | 0     |
| pyurf      | 0.149 | 0 | 0    | 0     | 0     | 0    | 0.149 | 0 | 0.148 | 0     | 0    | 0     |
| fmbp1      | 0     | 0 | 0    | 0     | 0     | 0    | 0     | 0 | 0     | 0     | 0.11 | 0.109 |
| atp13a1    | 0     | 0 | 0    | 0.148 | 0.148 | 0    | 0     | 0 | 0     | 0.148 | 0    | 0     |
| svop       | 0     | 0 | 0    | 0.148 | 0.148 | 0    | 0     | 0 | 0     | 0.148 | 0    | 0     |
| tufm       | 0     | 0 | 0    | 0.148 | 0.148 | 0    | 0     | 0 | 0     | 0.148 | 0    | 0     |
| mpp1       | 0     | 0 | 0    | 0.113 | 0.113 | 0    | 0     | 0 | 0.104 | 0.113 | 0    | 0     |
| khsrp      | 0     | 0 | 0    | 0.147 | 0.147 | 0    | 0     | 0 | 0     | 0.147 | 0    | 0     |
| snora67    | 0     | 0 | 0    | 0.147 | 0.147 | 0    | 0     | 0 | 0     | 0.147 | 0    | 0     |
| snora68    | 0     | 0 | 0    | 0.147 | 0.147 | 0    | 0     | 0 | 0     | 0.147 | 0    | 0     |
| mir122     | 0     | 0 | 0.22 | 0     | 0     | 0.22 | 0     | 0 | 0     | 0     | 0    | 0     |
| glud2      | 0     | 0 | 0    | 0.146 | 0.146 | 0    | 0     | 0 | 0     | 0.146 | 0    | 0     |
| hmg1       | 0     | 0 | 0    | 0.146 | 0.146 | 0    | 0     | 0 | 0     | 0.146 | 0    | 0     |
| mir15a     | 0     | 0 | 0    | 0.146 | 0.146 | 0    | 0     | 0 | 0     | 0.146 | 0    | 0     |
| ncs1       | 0     | 0 | 0    | 0.146 | 0.146 | 0    | 0     | 0 | 0     | 0.146 | 0    | 0     |
| cd2bp2     | 0     | 0 | 0    | 0     | 0     | 0    | 0     | 0 | 0     | 0     | 0    | 0     |
| kank3      | 0.145 | 0 | 0    | 0     | 0     | 0    | 0.145 | 0 | 0.147 | 0     | 0    | 0     |
| kank4      | 0.145 | 0 | 0    | 0     | 0     | 0    | 0.145 | 0 | 0.147 | 0     | 0    | 0     |
| tpm4       | 0.141 | 0 | 0    | 0     | 0     | 0    | 0.141 | 0 | 0.155 | 0     | 0    | 0     |
| atp1a4     | 0     | 0 | 0    | 0.145 | 0.145 | 0    | 0     | 0 | 0     | 0.145 | 0    | 0     |
| hdhd1      | 0     | 0 | 0    | 0.145 | 0.145 | 0    | 0     | 0 | 0     | 0.145 | 0    | 0     |
| lrrn3      | 0     | 0 | 0    | 0.145 | 0.145 | 0    | 0     | 0 | 0     | 0.145 | 0    | 0     |
| sms        | 0     | 0 | 0    | 0.144 | 0.144 | 0    | 0     | 0 | 0     | 0.144 | 0    | 0     |
| ovca2      | 0     | 0 | 0    | 0.109 | 0.109 | 0    | 0     | 0 | 0.104 | 0.109 | 0    | 0     |
| gid8       | 0.144 | 0 | 0    | 0     | 0     | 0    | 0.144 | 0 | 0.143 | 0     | 0    | 0     |
| ppp5c      | 0.144 | 0 | 0    | 0     | 0     | 0    | 0.144 | 0 | 0.143 | 0     | 0    | 0     |
| atp1b4     | 0     | 0 | 0    | 0.143 | 0.143 | 0    | 0     | 0 | 0     | 0.143 | 0    | 0     |
| gng10      | 0     | 0 | 0    | 0.143 | 0.143 | 0    | 0     | 0 | 0     | 0.143 | 0    | 0     |
| slc6a6     | 0     | 0 | 0    | 0.142 | 0.142 | 0    | 0     | 0 | 0     | 0.142 | 0    | 0     |
| tmem59l    | 0     | 0 | 0    | 0.142 | 0.142 | 0    | 0     | 0 | 0     | 0.142 | 0    | 0     |
| cep70      | 0.139 | 0 | 0    | 0     | 0     | 0    | 0.139 | 0 | 0.146 | 0     | 0    | 0     |
| entpd3     | 0     | 0 | 0    | 0.141 | 0.141 | 0    | 0     | 0 | 0     | 0.141 | 0    | 0     |

|           |       |   |     |       |       |     |       |   |       |       |   |   |
|-----------|-------|---|-----|-------|-------|-----|-------|---|-------|-------|---|---|
| krt12     | 0     | 0 | 0   | 0.141 | 0.141 | 0   | 0     | 0 | 0     | 0.141 | 0 | 0 |
| mdp1      | 0     | 0 | 0   | 0.141 | 0.141 | 0   | 0     | 0 | 0     | 0.141 | 0 | 0 |
| myo1b     | 0.14  | 0 | 0   | 0     | 0     | 0   | 0.14  | 0 | 0.141 | 0     | 0 | 0 |
| arfgef1   | 0.135 | 0 | 0   | 0     | 0     | 0   | 0.135 | 0 | 0.15  | 0     | 0 | 0 |
| snhg16    | 0     | 0 | 0   | 0.14  | 0.14  | 0   | 0     | 0 | 0     | 0.14  | 0 | 0 |
| tuba4b    | 0     | 0 | 0   | 0.14  | 0.14  | 0   | 0     | 0 | 0     | 0.14  | 0 | 0 |
| cope      | 0.137 | 0 | 0   | 0     | 0     | 0   | 0.137 | 0 | 0.144 | 0     | 0 | 0 |
| c2cd2l    | 0     | 0 | 0   | 0.139 | 0.139 | 0   | 0     | 0 | 0     | 0.139 | 0 | 0 |
| caprin2   | 0     | 0 | 0   | 0.139 | 0.139 | 0   | 0     | 0 | 0     | 0.139 | 0 | 0 |
| gca       | 0     | 0 | 0   | 0.139 | 0.139 | 0   | 0     | 0 | 0     | 0.139 | 0 | 0 |
| hmga1     | 0     | 0 | 0   | 0.139 | 0.139 | 0   | 0     | 0 | 0     | 0.139 | 0 | 0 |
| mettl7b   | 0     | 0 | 0   | 0.139 | 0.139 | 0   | 0     | 0 | 0     | 0.139 | 0 | 0 |
| prdm8     | 0     | 0 | 0   | 0.139 | 0.139 | 0   | 0     | 0 | 0     | 0.139 | 0 | 0 |
| sh3gl1    | 0.138 | 0 | 0   | 0     | 0     | 0   | 0.138 | 0 | 0.14  | 0     | 0 | 0 |
| ccd91     | 0.136 | 0 | 0   | 0     | 0     | 0   | 0.136 | 0 | 0.143 | 0     | 0 | 0 |
| adssl1    | 0     | 0 | 0   | 0.138 | 0.138 | 0   | 0     | 0 | 0     | 0.138 | 0 | 0 |
| atp6v1c2  | 0     | 0 | 0   | 0.138 | 0.138 | 0   | 0     | 0 | 0     | 0.138 | 0 | 0 |
| epb41l4b  | 0.104 | 0 | 0   | 0     | 0     | 0   | 0.104 | 0 | 0.106 | 0     | 0 | 0 |
| oaz2      | 0     | 0 | 0   | 0.138 | 0.138 | 0   | 0     | 0 | 0     | 0.138 | 0 | 0 |
| usp51     | 0     | 0 | 0   | 0.138 | 0.138 | 0   | 0     | 0 | 0     | 0.138 | 0 | 0 |
| opcml     | 0     | 0 | 0   | 0     | 0     | 0   | 0     | 0 | 0     | 0     | 0 | 0 |
| gng3      | 0.137 | 0 | 0   | 0     | 0     | 0   | 0.137 | 0 | 0.138 | 0     | 0 | 0 |
| aim1      | 0     | 0 | 0   | 0.137 | 0.137 | 0   | 0     | 0 | 0     | 0.137 | 0 | 0 |
| mctp1     | 0     | 0 | 0   | 0.137 | 0.137 | 0   | 0     | 0 | 0     | 0.137 | 0 | 0 |
| skcg-1    | 0     | 0 | 0   | 0.137 | 0.137 | 0   | 0     | 0 | 0     | 0.137 | 0 | 0 |
| pskh1     | 0.134 | 0 | 0   | 0     | 0     | 0   | 0.134 | 0 | 0.142 | 0     | 0 | 0 |
| gfpt1     | 0     | 0 | 0   | 0.136 | 0.136 | 0   | 0     | 0 | 0     | 0.136 | 0 | 0 |
| ptbp3     | 0     | 0 | 0   | 0.136 | 0.136 | 0   | 0     | 0 | 0     | 0.136 | 0 | 0 |
| slc16a10  | 0     | 0 | 0   | 0.136 | 0.136 | 0   | 0     | 0 | 0     | 0.136 | 0 | 0 |
| slc25a18  | 0     | 0 | 0   | 0.136 | 0.136 | 0   | 0     | 0 | 0     | 0.136 | 0 | 0 |
| ampd2     | 0.135 | 0 | 0   | 0     | 0     | 0   | 0.135 | 0 | 0.137 | 0     | 0 | 0 |
| lgsn      | 0     | 0 | 0   | 0     | 0     | 0   | 0     | 0 | 0     | 0     | 0 | 0 |
| linc00470 | 0     | 0 | 0   | 0.135 | 0.135 | 0   | 0     | 0 | 0     | 0.135 | 0 | 0 |
| kank2     | 0.134 | 0 | 0   | 0     | 0     | 0   | 0.134 | 0 | 0.136 | 0     | 0 | 0 |
| skap2     | 0.133 | 0 | 0   | 0     | 0     | 0   | 0.133 | 0 | 0.138 | 0     | 0 | 0 |
| ak1       | 0     | 0 | 0   | 0.134 | 0.134 | 0   | 0     | 0 | 0     | 0.134 | 0 | 0 |
| nudt21    | 0     | 0 | 0   | 0.134 | 0.134 | 0   | 0     | 0 | 0     | 0.134 | 0 | 0 |
| mapre3    | 0.132 | 0 | 0   | 0     | 0     | 0   | 0.132 | 0 | 0.137 | 0     | 0 | 0 |
| rf115     | 0     | 0 | 0   | 0     | 0     | 0   | 0     | 0 | 0     | 0     | 0 | 0 |
| dpf3      | 0     | 0 | 0.2 | 0     | 0     | 0.2 | 0     | 0 | 0     | 0     | 0 | 0 |
| map3k3    | 0.133 | 0 | 0   | 0     | 0     | 0   | 0.133 | 0 | 0.134 | 0     | 0 | 0 |

|             |       |   |       |       |       |       |       |   |       |       |   |   |
|-------------|-------|---|-------|-------|-------|-------|-------|---|-------|-------|---|---|
| bzap1       | 0     | 0 | 0     | 0.133 | 0.133 | 0     | 0     | 0 | 0     | 0.133 | 0 | 0 |
| calm5       | 0     | 0 | 0     | 0.132 | 0.132 | 0     | 0     | 0 | 0     | 0.132 | 0 | 0 |
| ofd1p17     | 0     | 0 | 0     | 0.132 | 0.132 | 0     | 0     | 0 | 0     | 0.132 | 0 | 0 |
| ofd1p18y    | 0     | 0 | 0     | 0.132 | 0.132 | 0     | 0     | 0 | 0     | 0.132 | 0 | 0 |
| brms1       | 0     | 0 | 0     | 0.131 | 0.131 | 0     | 0     | 0 | 0     | 0.131 | 0 | 0 |
| cln3        | 0     | 0 | 0     | 0.131 | 0.131 | 0     | 0     | 0 | 0     | 0.131 | 0 | 0 |
| cnm1        | 0     | 0 | 0     | 0.131 | 0.131 | 0     | 0     | 0 | 0     | 0.131 | 0 | 0 |
| hagh        | 0     | 0 | 0     | 0.131 | 0.131 | 0     | 0     | 0 | 0     | 0.131 | 0 | 0 |
| linc00984   | 0     | 0 | 0     | 0.131 | 0.131 | 0     | 0     | 0 | 0     | 0.131 | 0 | 0 |
| mir4435-1hg | 0     | 0 | 0     | 0.131 | 0.131 | 0     | 0     | 0 | 0     | 0.131 | 0 | 0 |
| pde7a       | 0     | 0 | 0     | 0.131 | 0.131 | 0     | 0     | 0 | 0     | 0.131 | 0 | 0 |
| proa        | 0     | 0 | 0     | 0.131 | 0.131 | 0     | 0     | 0 | 0     | 0.131 | 0 | 0 |
| sat1        | 0     | 0 | 0     | 0.131 | 0.131 | 0     | 0     | 0 | 0     | 0.131 | 0 | 0 |
| tfb2m       | 0     | 0 | 0     | 0.131 | 0.131 | 0     | 0     | 0 | 0     | 0.131 | 0 | 0 |
| gnb2        | 0.13  | 0 | 0     | 0     | 0     | 0     | 0.13  | 0 | 0.131 | 0     | 0 | 0 |
| aebp1       | 0     | 0 | 0     | 0.13  | 0.13  | 0     | 0     | 0 | 0     | 0.13  | 0 | 0 |
| bcat1       | 0     | 0 | 0     | 0.13  | 0.13  | 0     | 0     | 0 | 0     | 0.13  | 0 | 0 |
| brd9        | 0     | 0 | 0.195 | 0     | 0     | 0.195 | 0     | 0 | 0     | 0     | 0 | 0 |
| c12orf75    | 0     | 0 | 0     | 0.13  | 0.13  | 0     | 0     | 0 | 0     | 0.13  | 0 | 0 |
| cnm3        | 0     | 0 | 0     | 0.13  | 0.13  | 0     | 0     | 0 | 0     | 0.13  | 0 | 0 |
| defb125     | 0     | 0 | 0     | 0.13  | 0.13  | 0     | 0     | 0 | 0     | 0.13  | 0 | 0 |
| dlc1        | 0.128 | 0 | 0     | 0     | 0     | 0     | 0.128 | 0 | 0.134 | 0     | 0 | 0 |
| mfsd11      | 0     | 0 | 0     | 0.13  | 0.13  | 0     | 0     | 0 | 0     | 0.13  | 0 | 0 |
| pygm        | 0     | 0 | 0     | 0.13  | 0.13  | 0     | 0     | 0 | 0     | 0.13  | 0 | 0 |
| slc10a7     | 0     | 0 | 0     | 0.13  | 0.13  | 0     | 0     | 0 | 0     | 0.13  | 0 | 0 |
| znf24       | 0     | 0 | 0.194 | 0     | 0     | 0.194 | 0     | 0 | 0     | 0     | 0 | 0 |
| kcnip1      | 0     | 0 | 0     | 0.129 | 0.129 | 0     | 0     | 0 | 0     | 0.129 | 0 | 0 |
| pld6        | 0     | 0 | 0     | 0.129 | 0.129 | 0     | 0     | 0 | 0     | 0.129 | 0 | 0 |
| polr2g      | 0     | 0 | 0     | 0.129 | 0.129 | 0     | 0     | 0 | 0     | 0.129 | 0 | 0 |
| prkd1       | 0.129 | 0 | 0     | 0     | 0     | 0     | 0.129 | 0 | 0.129 | 0     | 0 | 0 |
| sec14l2     | 0.129 | 0 | 0     | 0     | 0     | 0     | 0.129 | 0 | 0.129 | 0     | 0 | 0 |
| slc26a8     | 0     | 0 | 0     | 0.129 | 0.129 | 0     | 0     | 0 | 0     | 0.129 | 0 | 0 |
| srsf2       | 0     | 0 | 0     | 0.129 | 0.129 | 0     | 0     | 0 | 0     | 0.129 | 0 | 0 |
| nrbp1       | 0.128 | 0 | 0     | 0     | 0     | 0     | 0.128 | 0 | 0.129 | 0     | 0 | 0 |
| bckdha      | 0     | 0 | 0     | 0.128 | 0.128 | 0     | 0     | 0 | 0     | 0.128 | 0 | 0 |
| dync1h2     | 0.128 | 0 | 0     | 0     | 0     | 0     | 0.128 | 0 | 0.128 | 0     | 0 | 0 |
| ndufa7      | 0     | 0 | 0     | 0.128 | 0.128 | 0     | 0     | 0 | 0     | 0.128 | 0 | 0 |
| wnk2        | 0     | 0 | 0     | 0.128 | 0.128 | 0     | 0     | 0 | 0     | 0.128 | 0 | 0 |
| arl6        | 0.125 | 0 | 0     | 0     | 0     | 0     | 0.125 | 0 | 0.133 | 0     | 0 | 0 |
| rab43       | 0.126 | 0 | 0     | 0     | 0     | 0     | 0.126 | 0 | 0.131 | 0     | 0 | 0 |
| inf2        | 0.127 | 0 | 0     | 0     | 0     | 0     | 0.127 | 0 | 0.128 | 0     | 0 | 0 |

|           |       |   |   |       |       |   |       |   |       |       |   |   |
|-----------|-------|---|---|-------|-------|---|-------|---|-------|-------|---|---|
| aacs      | 0     | 0 | 0 | 0.127 | 0.127 | 0 | 0     | 0 | 0     | 0.127 | 0 | 0 |
| cox4i2    | 0     | 0 | 0 | 0.127 | 0.127 | 0 | 0     | 0 | 0     | 0.127 | 0 | 0 |
| defb105b  | 0     | 0 | 0 | 0.127 | 0.127 | 0 | 0     | 0 | 0     | 0.127 | 0 | 0 |
| defb107a  | 0     | 0 | 0 | 0.127 | 0.127 | 0 | 0     | 0 | 0     | 0.127 | 0 | 0 |
| defb107b  | 0     | 0 | 0 | 0.127 | 0.127 | 0 | 0     | 0 | 0     | 0.127 | 0 | 0 |
| mrs2      | 0     | 0 | 0 | 0.127 | 0.127 | 0 | 0     | 0 | 0     | 0.127 | 0 | 0 |
| pdcd7     | 0     | 0 | 0 | 0.127 | 0.127 | 0 | 0     | 0 | 0     | 0.127 | 0 | 0 |
| slc7a5    | 0     | 0 | 0 | 0.127 | 0.127 | 0 | 0     | 0 | 0     | 0.127 | 0 | 0 |
| znf354b   | 0     | 0 | 0 | 0.127 | 0.127 | 0 | 0     | 0 | 0     | 0.127 | 0 | 0 |
| dync1li1  | 0.127 | 0 | 0 | 0     | 0     | 0 | 0.127 | 0 | 0.126 | 0     | 0 | 0 |
| sept1     | 0.126 | 0 | 0 | 0     | 0     | 0 | 0.126 | 0 | 0.127 | 0     | 0 | 0 |
| dpy19l2p2 | 0     | 0 | 0 | 0.126 | 0.126 | 0 | 0     | 0 | 0     | 0.126 | 0 | 0 |
| dpy19l2p4 | 0     | 0 | 0 | 0.126 | 0.126 | 0 | 0     | 0 | 0     | 0.126 | 0 | 0 |
| gng5      | 0     | 0 | 0 | 0.126 | 0.126 | 0 | 0     | 0 | 0     | 0.126 | 0 | 0 |
| lpin2     | 0     | 0 | 0 | 0.126 | 0.126 | 0 | 0     | 0 | 0     | 0.126 | 0 | 0 |
| mrpl46    | 0     | 0 | 0 | 0.126 | 0.126 | 0 | 0     | 0 | 0     | 0.126 | 0 | 0 |
| qsox1     | 0     | 0 | 0 | 0.126 | 0.126 | 0 | 0     | 0 | 0     | 0.126 | 0 | 0 |
| slc7a6    | 0     | 0 | 0 | 0.126 | 0.126 | 0 | 0     | 0 | 0     | 0.126 | 0 | 0 |
| smox      | 0     | 0 | 0 | 0.126 | 0.126 | 0 | 0     | 0 | 0     | 0.126 | 0 | 0 |
| spam1     | 0     | 0 | 0 | 0.126 | 0.126 | 0 | 0     | 0 | 0     | 0.126 | 0 | 0 |
| spata21   | 0     | 0 | 0 | 0.126 | 0.126 | 0 | 0     | 0 | 0     | 0.126 | 0 | 0 |
| mob2      | 0.124 | 0 | 0 | 0     | 0     | 0 | 0.124 | 0 | 0.128 | 0     | 0 | 0 |
| ralgps1   | 0.125 | 0 | 0 | 0     | 0     | 0 | 0.125 | 0 | 0.126 | 0     | 0 | 0 |
| arhgap19  | 0.124 | 0 | 0 | 0     | 0     | 0 | 0.124 | 0 | 0.127 | 0     | 0 | 0 |
| barhl1    | 0     | 0 | 0 | 0.125 | 0.125 | 0 | 0     | 0 | 0     | 0.125 | 0 | 0 |
| btn1a1    | 0     | 0 | 0 | 0.125 | 0.125 | 0 | 0     | 0 | 0     | 0.125 | 0 | 0 |
| plscr2    | 0     | 0 | 0 | 0.125 | 0.125 | 0 | 0     | 0 | 0     | 0.125 | 0 | 0 |
| ppp2r1b   | 0     | 0 | 0 | 0.125 | 0.125 | 0 | 0     | 0 | 0     | 0.125 | 0 | 0 |
| teea18    | 0     | 0 | 0 | 0.125 | 0.125 | 0 | 0     | 0 | 0     | 0.125 | 0 | 0 |
| myl12b    | 0.125 | 0 | 0 | 0     | 0     | 0 | 0.125 | 0 | 0.124 | 0     | 0 | 0 |
| alpp      | 0     | 0 | 0 | 0.124 | 0.124 | 0 | 0     | 0 | 0     | 0.124 | 0 | 0 |
| gspt1     | 0     | 0 | 0 | 0.124 | 0.124 | 0 | 0     | 0 | 0     | 0.124 | 0 | 0 |
| mir26a1   | 0     | 0 | 0 | 0.124 | 0.124 | 0 | 0     | 0 | 0     | 0.124 | 0 | 0 |
| pdha2     | 0     | 0 | 0 | 0.124 | 0.124 | 0 | 0     | 0 | 0     | 0.124 | 0 | 0 |
| rp24      | 0     | 0 | 0 | 0.124 | 0.124 | 0 | 0     | 0 | 0     | 0.124 | 0 | 0 |
| slc31a1   | 0     | 0 | 0 | 0.124 | 0.124 | 0 | 0     | 0 | 0     | 0.124 | 0 | 0 |
| eps15     | 0.116 | 0 | 0 | 0     | 0     | 0 | 0.116 | 0 | 0.139 | 0     | 0 | 0 |
| frmpd1    | 0.122 | 0 | 0 | 0     | 0     | 0 | 0.122 | 0 | 0.127 | 0     | 0 | 0 |
| atad2b    | 0     | 0 | 0 | 0.123 | 0.123 | 0 | 0     | 0 | 0     | 0.123 | 0 | 0 |
| b3gnt1    | 0     | 0 | 0 | 0.123 | 0.123 | 0 | 0     | 0 | 0     | 0.123 | 0 | 0 |
| cdc73     | 0     | 0 | 0 | 0.123 | 0.123 | 0 | 0     | 0 | 0     | 0.123 | 0 | 0 |

|         |       |   |       |       |       |       |       |   |       |       |       |       |
|---------|-------|---|-------|-------|-------|-------|-------|---|-------|-------|-------|-------|
| dnah2   | 0     | 0 | 0     | 0.123 | 0.123 | 0     | 0     | 0 | 0     | 0.123 | 0     | 0     |
| gnpda1  | 0     | 0 | 0     | 0.123 | 0.123 | 0     | 0     | 0 | 0     | 0.123 | 0     | 0     |
| nek8    | 0     | 0 | 0     | 0.123 | 0.123 | 0     | 0     | 0 | 0     | 0.123 | 0     | 0     |
| obp2b   | 0     | 0 | 0     | 0.123 | 0.123 | 0     | 0     | 0 | 0     | 0.123 | 0     | 0     |
| typ23a  | 0     | 0 | 0     | 0.123 | 0.123 | 0     | 0     | 0 | 0     | 0.123 | 0     | 0     |
| typ23b  | 0     | 0 | 0     | 0.123 | 0.123 | 0     | 0     | 0 | 0     | 0.123 | 0     | 0     |
| arih2   | 0     | 0 | 0     | 0     | 0     | 0     | 0     | 0 | 0     | 0     | 0     | 0     |
| bckdk   | 0     | 0 | 0     | 0.122 | 0.122 | 0     | 0     | 0 | 0     | 0.122 | 0     | 0     |
| elk1    | 0     | 0 | 0     | 0.122 | 0.122 | 0     | 0     | 0 | 0     | 0.122 | 0     | 0     |
| fam221b | 0     | 0 | 0     | 0.122 | 0.122 | 0     | 0     | 0 | 0     | 0.122 | 0     | 0     |
| mcoln2  | 0     | 0 | 0     | 0.122 | 0.122 | 0     | 0     | 0 | 0     | 0.122 | 0     | 0     |
| msto1   | 0     | 0 | 0     | 0.122 | 0.122 | 0     | 0     | 0 | 0     | 0.122 | 0     | 0     |
| naspp1  | 0     | 0 | 0     | 0.122 | 0.122 | 0     | 0     | 0 | 0     | 0.122 | 0     | 0     |
| ppp2r5c | 0.12  | 0 | 0     | 0     | 0     | 0     | 0.12  | 0 | 0.126 | 0     | 0     | 0     |
| rab8b   | 0     | 0 | 0     | 0.122 | 0.122 | 0     | 0     | 0 | 0     | 0.122 | 0     | 0     |
| samd9l  | 0     | 0 | 0     | 0.122 | 0.122 | 0     | 0     | 0 | 0     | 0.122 | 0     | 0     |
| trappc1 | 0     | 0 | 0     | 0.122 | 0.122 | 0     | 0     | 0 | 0     | 0.122 | 0     | 0     |
| copz1   | 0.121 | 0 | 0     | 0     | 0     | 0     | 0.121 | 0 | 0.123 | 0     | 0     | 0     |
| izumo1  | 0     | 0 | 0     | 0     | 0     | 0     | 0     | 0 | 0.101 | 0     | 0.132 | 0.132 |
| g3bp1   | 0.118 | 0 | 0     | 0     | 0     | 0     | 0.118 | 0 | 0.128 | 0     | 0     | 0     |
| EIF2B4  | 0     | 0 | 0     | 0.121 | 0.121 | 0     | 0     | 0 | 0     | 0.121 | 0     | 0     |
| etf1    | 0     | 0 | 0     | 0.121 | 0.121 | 0     | 0     | 0 | 0     | 0.121 | 0     | 0     |
| golim4  | 0     | 0 | 0     | 0.121 | 0.121 | 0     | 0     | 0 | 0     | 0.121 | 0     | 0     |
| ogdh    | 0     | 0 | 0     | 0.121 | 0.121 | 0     | 0     | 0 | 0     | 0.121 | 0     | 0     |
| phtf2   | 0     | 0 | 0     | 0.121 | 0.121 | 0     | 0     | 0 | 0     | 0.121 | 0     | 0     |
| pim1    | 0     | 0 | 0     | 0.121 | 0.121 | 0     | 0     | 0 | 0     | 0.121 | 0     | 0     |
| rn7sk   | 0     | 0 | 0     | 0.121 | 0.121 | 0     | 0     | 0 | 0     | 0.121 | 0     | 0     |
| ophn1   | 0.118 | 0 | 0     | 0     | 0     | 0     | 0.118 | 0 | 0.126 | 0     | 0     | 0     |
| rab33b  | 0.117 | 0 | 0     | 0     | 0     | 0     | 0.117 | 0 | 0.128 | 0     | 0     | 0     |
| rab6b   | 0.118 | 0 | 0     | 0     | 0     | 0     | 0.118 | 0 | 0.126 | 0     | 0     | 0     |
| ap12    | 0.117 | 0 | 0     | 0     | 0     | 0     | 0.117 | 0 | 0.127 | 0     | 0     | 0     |
| ccd41   | 0.117 | 0 | 0     | 0     | 0     | 0     | 0.117 | 0 | 0.127 | 0     | 0     | 0     |
| chiap2  | 0     | 0 | 0     | 0.12  | 0.12  | 0     | 0     | 0 | 0     | 0.12  | 0     | 0     |
| dmrt3   | 0     | 0 | 0     | 0.12  | 0.12  | 0     | 0     | 0 | 0     | 0.12  | 0     | 0     |
| epg5    | 0     | 0 | 0     | 0.12  | 0.12  | 0     | 0     | 0 | 0     | 0.12  | 0     | 0     |
| folr2   | 0     | 0 | 0     | 0.12  | 0.12  | 0     | 0     | 0 | 0     | 0.12  | 0     | 0     |
| gprc6a  | 0     | 0 | 0     | 0.12  | 0.12  | 0     | 0     | 0 | 0     | 0.12  | 0     | 0     |
| lsm4    | 0     | 0 | 0     | 0.12  | 0.12  | 0     | 0     | 0 | 0     | 0.12  | 0     | 0     |
| znf181  | 0     | 0 | 0     | 0.12  | 0.12  | 0     | 0     | 0 | 0     | 0.12  | 0     | 0     |
| rab5b   | 0.113 | 0 | 0     | 0     | 0     | 0     | 0.113 | 0 | 0.133 | 0     | 0     | 0     |
| tmbim6  | 0     | 0 | 0.179 | 0     | 0     | 0.179 | 0     | 0 | 0     | 0     | 0     | 0     |

|            |       |   |   |       |       |   |       |   |       |       |   |   |
|------------|-------|---|---|-------|-------|---|-------|---|-------|-------|---|---|
| dlat       | 0     | 0 | 0 | 0.119 | 0.119 | 0 | 0     | 0 | 0     | 0.119 | 0 | 0 |
| hsd3b7     | 0     | 0 | 0 | 0.119 | 0.119 | 0 | 0     | 0 | 0     | 0.119 | 0 | 0 |
| slc19a2    | 0     | 0 | 0 | 0.119 | 0.119 | 0 | 0     | 0 | 0     | 0.119 | 0 | 0 |
| mtmr1      | 0.118 | 0 | 0 | 0     | 0     | 0 | 0.118 | 0 | 0.12  | 0     | 0 | 0 |
| scyl2      | 0.118 | 0 | 0 | 0     | 0     | 0 | 0.118 | 0 | 0.12  | 0     | 0 | 0 |
| spry1      | 0     | 0 | 0 | 0     | 0     | 0 | 0     | 0 | 0     | 0     | 0 | 0 |
| elmod1     | 0.116 | 0 | 0 | 0     | 0     | 0 | 0.116 | 0 | 0.123 | 0     | 0 | 0 |
| sphk2      | 0.118 | 0 | 0 | 0     | 0     | 0 | 0.118 | 0 | 0.119 | 0     | 0 | 0 |
| loc440895  | 0     | 0 | 0 | 0.118 | 0.118 | 0 | 0     | 0 | 0     | 0.118 | 0 | 0 |
| oaz1       | 0     | 0 | 0 | 0.118 | 0.118 | 0 | 0     | 0 | 0     | 0.118 | 0 | 0 |
| znf18      | 0     | 0 | 0 | 0.118 | 0.118 | 0 | 0     | 0 | 0     | 0.118 | 0 | 0 |
| cltcl1     | 0.116 | 0 | 0 | 0     | 0     | 0 | 0.116 | 0 | 0.121 | 0     | 0 | 0 |
| ampd3      | 0     | 0 | 0 | 0.117 | 0.117 | 0 | 0     | 0 | 0     | 0.117 | 0 | 0 |
| emx2os     | 0     | 0 | 0 | 0.117 | 0.117 | 0 | 0     | 0 | 0     | 0.117 | 0 | 0 |
| nags       | 0     | 0 | 0 | 0.117 | 0.117 | 0 | 0     | 0 | 0     | 0.117 | 0 | 0 |
| ppplr2p1   | 0     | 0 | 0 | 0.117 | 0.117 | 0 | 0     | 0 | 0     | 0.117 | 0 | 0 |
| prpsap2    | 0     | 0 | 0 | 0.117 | 0.117 | 0 | 0     | 0 | 0     | 0.117 | 0 | 0 |
| seh1l      | 0     | 0 | 0 | 0.117 | 0.117 | 0 | 0     | 0 | 0     | 0.117 | 0 | 0 |
| arl8a      | 0.113 | 0 | 0 | 0     | 0     | 0 | 0.113 | 0 | 0.124 | 0     | 0 | 0 |
| cbln4      | 0     | 0 | 0 | 0.116 | 0.116 | 0 | 0     | 0 | 0     | 0.116 | 0 | 0 |
| heatr1     | 0     | 0 | 0 | 0.116 | 0.116 | 0 | 0     | 0 | 0     | 0.116 | 0 | 0 |
| prr5l      | 0.116 | 0 | 0 | 0     | 0     | 0 | 0.116 | 0 | 0.116 | 0     | 0 | 0 |
| ptpn3      | 0.114 | 0 | 0 | 0     | 0     | 0 | 0.114 | 0 | 0.12  | 0     | 0 | 0 |
| specc1     | 0.113 | 0 | 0 | 0     | 0     | 0 | 0.113 | 0 | 0.12  | 0     | 0 | 0 |
| best3      | 0     | 0 | 0 | 0.115 | 0.115 | 0 | 0     | 0 | 0     | 0.115 | 0 | 0 |
| pafah1b1p1 | 0     | 0 | 0 | 0.115 | 0.115 | 0 | 0     | 0 | 0     | 0.115 | 0 | 0 |
| pafah1b1p2 | 0     | 0 | 0 | 0.115 | 0.115 | 0 | 0     | 0 | 0     | 0.115 | 0 | 0 |
| retsat     | 0     | 0 | 0 | 0.115 | 0.115 | 0 | 0     | 0 | 0     | 0.115 | 0 | 0 |
| slc6a16    | 0     | 0 | 0 | 0.115 | 0.115 | 0 | 0     | 0 | 0     | 0.115 | 0 | 0 |
| snrpc      | 0     | 0 | 0 | 0.115 | 0.115 | 0 | 0     | 0 | 0     | 0.115 | 0 | 0 |
| tdo2       | 0     | 0 | 0 | 0.115 | 0.115 | 0 | 0     | 0 | 0     | 0.115 | 0 | 0 |
| tec        | 0     | 0 | 0 | 0.115 | 0.115 | 0 | 0     | 0 | 0     | 0.115 | 0 | 0 |
| wdr13      | 0     | 0 | 0 | 0.115 | 0.115 | 0 | 0     | 0 | 0     | 0.115 | 0 | 0 |
| tuba8      | 0.113 | 0 | 0 | 0     | 0     | 0 | 0.113 | 0 | 0.119 | 0     | 0 | 0 |
| gmfg       | 0.114 | 0 | 0 | 0     | 0     | 0 | 0.114 | 0 | 0.116 | 0     | 0 | 0 |
| dnah1      | 0.112 | 0 | 0 | 0     | 0     | 0 | 0.112 | 0 | 0.119 | 0     | 0 | 0 |
| fscn3      | 0.112 | 0 | 0 | 0     | 0     | 0 | 0.112 | 0 | 0.119 | 0     | 0 | 0 |
| acy1       | 0     | 0 | 0 | 0.114 | 0.114 | 0 | 0     | 0 | 0     | 0.114 | 0 | 0 |
| ccd37      | 0     | 0 | 0 | 0.114 | 0.114 | 0 | 0     | 0 | 0     | 0.114 | 0 | 0 |
| fam120b    | 0     | 0 | 0 | 0.114 | 0.114 | 0 | 0     | 0 | 0     | 0.114 | 0 | 0 |
| gmpr2      | 0     | 0 | 0 | 0.114 | 0.114 | 0 | 0     | 0 | 0     | 0.114 | 0 | 0 |

|          |       |   |       |       |       |       |       |   |       |       |   |   |
|----------|-------|---|-------|-------|-------|-------|-------|---|-------|-------|---|---|
| midn     | 0     | 0 | 0.171 | 0     | 0     | 0.171 | 0     | 0 | 0     | 0     | 0 | 0 |
| otud1    | 0     | 0 | 0     | 0.114 | 0.114 | 0     | 0     | 0 | 0     | 0.114 | 0 | 0 |
| fli1     | 0     | 0 | 0     | 0     | 0     | 0     | 0     | 0 | 0     | 0     | 0 | 0 |
| golp3    | 0.11  | 0 | 0     | 0     | 0     | 0     | 0.11  | 0 | 0.122 | 0     | 0 | 0 |
| azin1    | 0     | 0 | 0     | 0.113 | 0.113 | 0     | 0     | 0 | 0     | 0.113 | 0 | 0 |
| defb106b | 0     | 0 | 0     | 0.113 | 0.113 | 0     | 0     | 0 | 0     | 0.113 | 0 | 0 |
| myo15a   | 0     | 0 | 0     | 0.113 | 0.113 | 0     | 0     | 0 | 0     | 0.113 | 0 | 0 |
| snord12c | 0     | 0 | 0     | 0.113 | 0.113 | 0     | 0     | 0 | 0     | 0.113 | 0 | 0 |
| wnt9b    | 0     | 0 | 0     | 0.113 | 0.113 | 0     | 0     | 0 | 0     | 0.113 | 0 | 0 |
| cstf2    | 0.111 | 0 | 0     | 0     | 0     | 0     | 0.111 | 0 | 0.115 | 0     | 0 | 0 |
| anxa11   | 0     | 0 | 0     | 0.112 | 0.112 | 0     | 0     | 0 | 0     | 0.112 | 0 | 0 |
| csn1s2bp | 0     | 0 | 0     | 0.112 | 0.112 | 0     | 0     | 0 | 0     | 0.112 | 0 | 0 |
| pygl     | 0     | 0 | 0     | 0.112 | 0.112 | 0     | 0     | 0 | 0     | 0.112 | 0 | 0 |
| snora69  | 0     | 0 | 0     | 0.112 | 0.112 | 0     | 0     | 0 | 0     | 0.112 | 0 | 0 |
| tbc1d5   | 0.112 | 0 | 0     | 0     | 0     | 0     | 0.112 | 0 | 0.112 | 0     | 0 | 0 |
| tff3     | 0     | 0 | 0     | 0.112 | 0.112 | 0     | 0     | 0 | 0     | 0.112 | 0 | 0 |
| trnt1    | 0     | 0 | 0     | 0.112 | 0.112 | 0     | 0     | 0 | 0     | 0.112 | 0 | 0 |
| rep15    | 0     | 0 | 0     | 0     | 0     | 0     | 0     | 0 | 0.1   | 0     | 0 | 0 |
| stk3     | 0.11  | 0 | 0     | 0     | 0     | 0     | 0.11  | 0 | 0.114 | 0     | 0 | 0 |
| ankrd7   | 0     | 0 | 0     | 0.111 | 0.111 | 0     | 0     | 0 | 0     | 0.111 | 0 | 0 |
| dld      | 0     | 0 | 0     | 0.111 | 0.111 | 0     | 0     | 0 | 0     | 0.111 | 0 | 0 |
| dnajc4   | 0     | 0 | 0     | 0.111 | 0.111 | 0     | 0     | 0 | 0     | 0.111 | 0 | 0 |
| pdk3     | 0     | 0 | 0     | 0.111 | 0.111 | 0     | 0     | 0 | 0     | 0.111 | 0 | 0 |
| ptcsc1   | 0     | 0 | 0     | 0.111 | 0.111 | 0     | 0     | 0 | 0     | 0.111 | 0 | 0 |
| rflk     | 0     | 0 | 0     | 0.111 | 0.111 | 0     | 0     | 0 | 0     | 0.111 | 0 | 0 |
| farp2    | 0.109 | 0 | 0     | 0     | 0     | 0     | 0.109 | 0 | 0.114 | 0     | 0 | 0 |
| ppp1ca   | 0.11  | 0 | 0     | 0     | 0     | 0     | 0.11  | 0 | 0.112 | 0     | 0 | 0 |
| ywhab    | 0.11  | 0 | 0     | 0     | 0     | 0     | 0.11  | 0 | 0.112 | 0     | 0 | 0 |
| relt     | 0.11  | 0 | 0     | 0     | 0     | 0     | 0.11  | 0 | 0.111 | 0     | 0 | 0 |
| feb7     | 0     | 0 | 0     | 0.11  | 0.11  | 0     | 0     | 0 | 0     | 0.11  | 0 | 0 |
| atp5g1   | 0     | 0 | 0     | 0.11  | 0.11  | 0     | 0     | 0 | 0     | 0.11  | 0 | 0 |
| bola3    | 0     | 0 | 0     | 0.11  | 0.11  | 0     | 0     | 0 | 0     | 0.11  | 0 | 0 |
| c19orf59 | 0     | 0 | 0     | 0.11  | 0.11  | 0     | 0     | 0 | 0     | 0.11  | 0 | 0 |
| dmx1     | 0     | 0 | 0     | 0.11  | 0.11  | 0     | 0     | 0 | 0     | 0.11  | 0 | 0 |
| emc4     | 0     | 0 | 0     | 0.11  | 0.11  | 0     | 0     | 0 | 0     | 0.11  | 0 | 0 |
| ppap2c   | 0     | 0 | 0     | 0.11  | 0.11  | 0     | 0     | 0 | 0     | 0.11  | 0 | 0 |
| rnu1-4   | 0     | 0 | 0     | 0.11  | 0.11  | 0     | 0     | 0 | 0     | 0.11  | 0 | 0 |
| rpl3l    | 0     | 0 | 0     | 0.11  | 0.11  | 0     | 0     | 0 | 0     | 0.11  | 0 | 0 |
| rpph1    | 0     | 0 | 0     | 0.11  | 0.11  | 0     | 0     | 0 | 0     | 0.11  | 0 | 0 |
| mkln1    | 0.108 | 0 | 0     | 0     | 0     | 0     | 0.108 | 0 | 0.113 | 0     | 0 | 0 |
| ap2a1    | 0.108 | 0 | 0     | 0     | 0     | 0     | 0.108 | 0 | 0.112 | 0     | 0 | 0 |

|          |       |   |   |       |       |   |       |   |       |       |   |   |
|----------|-------|---|---|-------|-------|---|-------|---|-------|-------|---|---|
| uri1     | 0.106 | 0 | 0 | 0     | 0     | 0 | 0.106 | 0 | 0.116 | 0     | 0 | 0 |
| atp11a   | 0     | 0 | 0 | 0.109 | 0.109 | 0 | 0     | 0 | 0     | 0.109 | 0 | 0 |
| cdh12    | 0     | 0 | 0 | 0.109 | 0.109 | 0 | 0     | 0 | 0     | 0.109 | 0 | 0 |
| defb105a | 0     | 0 | 0 | 0.109 | 0.109 | 0 | 0     | 0 | 0     | 0.109 | 0 | 0 |
| dnase2b  | 0     | 0 | 0 | 0.109 | 0.109 | 0 | 0     | 0 | 0     | 0.109 | 0 | 0 |
| ifrd2    | 0     | 0 | 0 | 0.109 | 0.109 | 0 | 0     | 0 | 0     | 0.109 | 0 | 0 |
| il1rap1  | 0     | 0 | 0 | 0.109 | 0.109 | 0 | 0     | 0 | 0     | 0.109 | 0 | 0 |
| pkdrej   | 0     | 0 | 0 | 0.109 | 0.109 | 0 | 0     | 0 | 0     | 0.109 | 0 | 0 |
| rab9bp1  | 0     | 0 | 0 | 0.109 | 0.109 | 0 | 0     | 0 | 0     | 0.109 | 0 | 0 |
| slc6a8   | 0     | 0 | 0 | 0.109 | 0.109 | 0 | 0     | 0 | 0     | 0.109 | 0 | 0 |
| zc3h4    | 0     | 0 | 0 | 0.109 | 0.109 | 0 | 0     | 0 | 0     | 0.109 | 0 | 0 |
| akap6    | 0.107 | 0 | 0 | 0     | 0     | 0 | 0.107 | 0 | 0.112 | 0     | 0 | 0 |
| pabpc1   | 0.108 | 0 | 0 | 0     | 0     | 0 | 0.108 | 0 | 0.11  | 0     | 0 | 0 |
| arsep1   | 0     | 0 | 0 | 0.108 | 0.108 | 0 | 0     | 0 | 0     | 0.108 | 0 | 0 |
| dsp      | 0     | 0 | 0 | 0.108 | 0.108 | 0 | 0     | 0 | 0     | 0.108 | 0 | 0 |
| fstl4    | 0     | 0 | 0 | 0.108 | 0.108 | 0 | 0     | 0 | 0     | 0.108 | 0 | 0 |
| hibch    | 0     | 0 | 0 | 0.108 | 0.108 | 0 | 0     | 0 | 0     | 0.108 | 0 | 0 |
| krt2     | 0     | 0 | 0 | 0.108 | 0.108 | 0 | 0     | 0 | 0     | 0.108 | 0 | 0 |
| pafah1b1 | 0     | 0 | 0 | 0.108 | 0.108 | 0 | 0     | 0 | 0     | 0.108 | 0 | 0 |
| rasgrf1  | 0.106 | 0 | 0 | 0     | 0     | 0 | 0.106 | 0 | 0.112 | 0     | 0 | 0 |
| tulp4    | 0     | 0 | 0 | 0.108 | 0.108 | 0 | 0     | 0 | 0     | 0.108 | 0 | 0 |
| ubr7     | 0     | 0 | 0 | 0.108 | 0.108 | 0 | 0     | 0 | 0     | 0.108 | 0 | 0 |
| myl5     | 0.108 | 0 | 0 | 0     | 0     | 0 | 0.108 | 0 | 0.106 | 0     | 0 | 0 |
| rtp3     | 0     | 0 | 0 | 0     | 0     | 0 | 0     | 0 | 0     | 0     | 0 | 0 |
| catsper1 | 0     | 0 | 0 | 0.107 | 0.107 | 0 | 0     | 0 | 0     | 0.107 | 0 | 0 |
| dach1    | 0     | 0 | 0 | 0.107 | 0.107 | 0 | 0     | 0 | 0     | 0.107 | 0 | 0 |
| dnah10   | 0     | 0 | 0 | 0.107 | 0.107 | 0 | 0     | 0 | 0     | 0.107 | 0 | 0 |
| dnah6    | 0     | 0 | 0 | 0.107 | 0.107 | 0 | 0     | 0 | 0     | 0.107 | 0 | 0 |
| fbxw12   | 0     | 0 | 0 | 0.107 | 0.107 | 0 | 0     | 0 | 0     | 0.107 | 0 | 0 |
| impact   | 0     | 0 | 0 | 0.107 | 0.107 | 0 | 0     | 0 | 0     | 0.107 | 0 | 0 |
| ndufs3   | 0     | 0 | 0 | 0.107 | 0.107 | 0 | 0     | 0 | 0     | 0.107 | 0 | 0 |
| neto2    | 0     | 0 | 0 | 0.107 | 0.107 | 0 | 0     | 0 | 0     | 0.107 | 0 | 0 |
| appl1    | 0     | 0 | 0 | 0.106 | 0.106 | 0 | 0     | 0 | 0     | 0.106 | 0 | 0 |
| cpo      | 0     | 0 | 0 | 0.106 | 0.106 | 0 | 0     | 0 | 0     | 0.106 | 0 | 0 |
| crtac1   | 0     | 0 | 0 | 0.106 | 0.106 | 0 | 0     | 0 | 0     | 0.106 | 0 | 0 |
| hdgfl1   | 0     | 0 | 0 | 0.106 | 0.106 | 0 | 0     | 0 | 0     | 0.106 | 0 | 0 |
| mat2b    | 0     | 0 | 0 | 0.106 | 0.106 | 0 | 0     | 0 | 0     | 0.106 | 0 | 0 |
| pate1    | 0     | 0 | 0 | 0.106 | 0.106 | 0 | 0     | 0 | 0     | 0.106 | 0 | 0 |
| rgl1     | 0.105 | 0 | 0 | 0     | 0     | 0 | 0.105 | 0 | 0.108 | 0     | 0 | 0 |
| slc30a10 | 0     | 0 | 0 | 0.106 | 0.106 | 0 | 0     | 0 | 0     | 0.106 | 0 | 0 |
| u2af2    | 0     | 0 | 0 | 0.106 | 0.106 | 0 | 0     | 0 | 0     | 0.106 | 0 | 0 |



|           |       |   |   |       |       |   |       |   |       |       |   |   |
|-----------|-------|---|---|-------|-------|---|-------|---|-------|-------|---|---|
| ccn12     | 0.102 | 0 | 0 | 0     | 0     | 0 | 0.102 | 0 | 0.113 | 0     | 0 | 0 |
| sept7     | 0.103 | 0 | 0 | 0     | 0     | 0 | 0.103 | 0 | 0.11  | 0     | 0 | 0 |
| abracl    | 0     | 0 | 0 | 0     | 0     | 0 | 0     | 0 | 0     | 0     | 0 | 0 |
| rab11fip1 | 0.105 | 0 | 0 | 0     | 0     | 0 | 0.105 | 0 | 0.106 | 0     | 0 | 0 |
| dhx15     | 0     | 0 | 0 | 0.105 | 0.105 | 0 | 0     | 0 | 0     | 0.105 | 0 | 0 |
| khynyn    | 0     | 0 | 0 | 0.105 | 0.105 | 0 | 0     | 0 | 0     | 0.105 | 0 | 0 |
| lrrc6     | 0     | 0 | 0 | 0.105 | 0.105 | 0 | 0     | 0 | 0     | 0.105 | 0 | 0 |
| ndufaf1   | 0     | 0 | 0 | 0.105 | 0.105 | 0 | 0     | 0 | 0     | 0.105 | 0 | 0 |
| slc27a5   | 0     | 0 | 0 | 0.105 | 0.105 | 0 | 0     | 0 | 0     | 0.105 | 0 | 0 |
| arhgap25  | 0.104 | 0 | 0 | 0     | 0     | 0 | 0.104 | 0 | 0.106 | 0     | 0 | 0 |
| rab25     | 0.103 | 0 | 0 | 0     | 0     | 0 | 0.103 | 0 | 0.107 | 0     | 0 | 0 |
| dmrtb1    | 0     | 0 | 0 | 0.104 | 0.104 | 0 | 0     | 0 | 0     | 0.104 | 0 | 0 |
| gtpbp10   | 0     | 0 | 0 | 0.104 | 0.104 | 0 | 0     | 0 | 0     | 0.104 | 0 | 0 |
| kctd3     | 0     | 0 | 0 | 0.104 | 0.104 | 0 | 0     | 0 | 0     | 0.104 | 0 | 0 |
| obs1      | 0.104 | 0 | 0 | 0     | 0     | 0 | 0.104 | 0 | 0.104 | 0     | 0 | 0 |
| pdk2      | 0     | 0 | 0 | 0.104 | 0.104 | 0 | 0     | 0 | 0     | 0.104 | 0 | 0 |
| rcan2     | 0     | 0 | 0 | 0.104 | 0.104 | 0 | 0     | 0 | 0     | 0.104 | 0 | 0 |
| rpl9      | 0     | 0 | 0 | 0.104 | 0.104 | 0 | 0     | 0 | 0     | 0.104 | 0 | 0 |
| smu1      | 0     | 0 | 0 | 0     | 0     | 0 | 0     | 0 | 0     | 0     | 0 | 0 |
| snora62   | 0     | 0 | 0 | 0.104 | 0.104 | 0 | 0     | 0 | 0     | 0.104 | 0 | 0 |
| zp1       | 0     | 0 | 0 | 0.104 | 0.104 | 0 | 0     | 0 | 0     | 0.104 | 0 | 0 |
| lrrc14    | 0.1   | 0 | 0 | 0     | 0     | 0 | 0.1   | 0 | 0.11  | 0     | 0 | 0 |
| lrrc24    | 0.1   | 0 | 0 | 0     | 0     | 0 | 0.1   | 0 | 0.11  | 0     | 0 | 0 |
| alpp12    | 0     | 0 | 0 | 0.103 | 0.103 | 0 | 0     | 0 | 0     | 0.103 | 0 | 0 |
| anp32d    | 0     | 0 | 0 | 0     | 0     | 0 | 0     | 0 | 0     | 0     | 0 | 0 |
| lco       | 0     | 0 | 0 | 0.103 | 0.103 | 0 | 0     | 0 | 0     | 0.103 | 0 | 0 |
| mlycd     | 0     | 0 | 0 | 0.103 | 0.103 | 0 | 0     | 0 | 0     | 0.103 | 0 | 0 |
| slc25a13  | 0     | 0 | 0 | 0.103 | 0.103 | 0 | 0     | 0 | 0     | 0.103 | 0 | 0 |
| stmn3     | 0.102 | 0 | 0 | 0     | 0     | 0 | 0.102 | 0 | 0.105 | 0     | 0 | 0 |
| tff1      | 0     | 0 | 0 | 0.103 | 0.103 | 0 | 0     | 0 | 0     | 0.103 | 0 | 0 |
| casin2    | 0     | 0 | 0 | 0     | 0     | 0 | 0     | 0 | 0.104 | 0     | 0 | 0 |
| cnot11    | 0.103 | 0 | 0 | 0     | 0     | 0 | 0.103 | 0 | 0.102 | 0     | 0 | 0 |
| nphp4     | 0     | 0 | 0 | 0     | 0     | 0 | 0     | 0 | 0.103 | 0     | 0 | 0 |
| rasa4b    | 0.101 | 0 | 0 | 0     | 0     | 0 | 0.101 | 0 | 0.105 | 0     | 0 | 0 |
| bspry     | 0     | 0 | 0 | 0.102 | 0.102 | 0 | 0     | 0 | 0     | 0.102 | 0 | 0 |
| dars2     | 0     | 0 | 0 | 0.102 | 0.102 | 0 | 0     | 0 | 0     | 0.102 | 0 | 0 |
| elf1      | 0     | 0 | 0 | 0.102 | 0.102 | 0 | 0     | 0 | 0     | 0.102 | 0 | 0 |
| fbp1      | 0     | 0 | 0 | 0.102 | 0.102 | 0 | 0     | 0 | 0     | 0.102 | 0 | 0 |
| fxn       | 0     | 0 | 0 | 0.102 | 0.102 | 0 | 0     | 0 | 0     | 0.102 | 0 | 0 |
| myo16     | 0     | 0 | 0 | 0.102 | 0.102 | 0 | 0     | 0 | 0     | 0.102 | 0 | 0 |
| papss1    | 0     | 0 | 0 | 0.102 | 0.102 | 0 | 0     | 0 | 0     | 0.102 | 0 | 0 |

|          |       |   |       |       |       |       |       |   |       |       |       |       |
|----------|-------|---|-------|-------|-------|-------|-------|---|-------|-------|-------|-------|
| prkxp1   | 0     | 0 | 0     | 0.102 | 0.102 | 0     | 0     | 0 | 0     | 0.102 | 0     | 0     |
| rln3     | 0     | 0 | 0     | 0.102 | 0.102 | 0     | 0     | 0 | 0     | 0.102 | 0     | 0     |
| slc7a10  | 0     | 0 | 0     | 0.102 | 0.102 | 0     | 0     | 0 | 0     | 0.102 | 0     | 0     |
| smoc1    | 0     | 0 | 0     | 0.102 | 0.102 | 0     | 0     | 0 | 0     | 0.102 | 0     | 0     |
| timm10   | 0     | 0 | 0     | 0.102 | 0.102 | 0     | 0     | 0 | 0     | 0.102 | 0     | 0     |
| znf358   | 0     | 0 | 0     | 0.102 | 0.102 | 0     | 0     | 0 | 0     | 0.102 | 0     | 0     |
| mterfd3  | 0.102 | 0 | 0     | 0     | 0     | 0     | 0.102 | 0 | 0.101 | 0     | 0     | 0     |
| dpy19l2  | 0     | 0 | 0     | 0.101 | 0.101 | 0     | 0     | 0 | 0     | 0.101 | 0     | 0     |
| emilin2  | 0     | 0 | 0     | 0.101 | 0.101 | 0     | 0     | 0 | 0     | 0.101 | 0     | 0     |
| khi32    | 0     | 0 | 0     | 0.101 | 0.101 | 0     | 0     | 0 | 0     | 0.101 | 0     | 0     |
| prkx     | 0     | 0 | 0     | 0.101 | 0.101 | 0     | 0     | 0 | 0     | 0.101 | 0     | 0     |
| mf112    | 0     | 0 | 0     | 0.101 | 0.101 | 0     | 0     | 0 | 0     | 0.101 | 0     | 0     |
| tut1     | 0     | 0 | 0     | 0.101 | 0.101 | 0     | 0     | 0 | 0     | 0.101 | 0     | 0     |
| zfyve1   | 0     | 0 | 0     | 0.101 | 0.101 | 0     | 0     | 0 | 0     | 0.101 | 0     | 0     |
| mff      | 0.1   | 0 | 0     | 0     | 0     | 0     | 0.1   | 0 | 0.102 | 0     | 0     | 0     |
| b4galt1  | 0     | 0 | 0     | 0.1   | 0.1   | 0     | 0     | 0 | 0     | 0.1   | 0     | 0     |
| gpr139   | 0     | 0 | 0     | 0.1   | 0.1   | 0     | 0     | 0 | 0     | 0.1   | 0     | 0     |
| hist1h3h | 0     | 0 | 0     | 0.1   | 0.1   | 0     | 0     | 0 | 0     | 0.1   | 0     | 0     |
| kcnrg    | 0     | 0 | 0     | 0.1   | 0.1   | 0     | 0     | 0 | 0     | 0.1   | 0     | 0     |
| mrpl43   | 0     | 0 | 0     | 0.1   | 0.1   | 0     | 0     | 0 | 0     | 0.1   | 0     | 0     |
| sz2      | 0     | 0 | 0     | 0.1   | 0.1   | 0     | 0     | 0 | 0     | 0.1   | 0     | 0     |
| ints4    | 0     | 0 | 0     | 0     | 0     | 0     | 0     | 0 | 0     | 0     | 0     | 0     |
| ncapp2   | 0     | 0 | 0     | 0     | 0     | 0     | 0     | 0 | 0     | 0     | 0     | 0     |
| tyw5     | 0     | 0 | 0.145 | 0     | 0     | 0.145 | 0     | 0 | 0     | 0     | 0     | 0     |
| asxl1    | 0     | 0 | 0     | 0     | 0     | 0     | 0     | 0 | 0     | 0     | 0     | 0     |
| pclo     | 0     | 0 | 0     | 0     | 0     | 0     | 0     | 0 | 0     | 0     | 0     | 0     |
| bnc1     | 0     | 0 | 0     | 0     | 0     | 0     | 0     | 0 | 0     | 0     | 0     | 0     |
| tspan11  | 0     | 0 | 0     | 0     | 0     | 0     | 0     | 0 | 0     | 0     | 0     | 0     |
| echs1    | 0     | 0 | 0     | 0     | 0     | 0     | 0     | 0 | 0     | 0     | 0     | 0     |
| galr3    | 0     | 0 | 0     | 0     | 0     | 0     | 0     | 0 | 0     | 0     | 0     | 0     |
| slc35b1  | 0     | 0 | 0     | 0     | 0     | 0     | 0     | 0 | 0     | 0     | 0     | 0     |
| jakmip3  | 0     | 0 | 0     | 0     | 0     | 0     | 0     | 0 | 0     | 0     | 0     | 0     |
| nelfcd   | 0     | 0 | 0     | 0     | 0     | 0     | 0     | 0 | 0     | 0     | 0.128 | 0.126 |
| wdr19    | 0     | 0 | 0     | 0     | 0     | 0     | 0     | 0 | 0     | 0     | 0     | 0     |
| mocos    | 0     | 0 | 0.124 | 0     | 0     | 0.124 | 0     | 0 | 0     | 0     | 0     | 0     |
| murc     | 0     | 0 | 0.124 | 0     | 0     | 0.124 | 0     | 0 | 0     | 0     | 0     | 0     |
| wdr27    | 0     | 0 | 0     | 0     | 0     | 0     | 0     | 0 | 0     | 0     | 0     | 0     |
| vstm2l   | 0     | 0 | 0     | 0     | 0     | 0     | 0     | 0 | 0     | 0     | 0     | 0     |
| mycbpap  | 0     | 0 | 0     | 0     | 0     | 0     | 0     | 0 | 0     | 0     | 0     | 0     |
| nell2    | 0     | 0 | 0     | 0     | 0     | 0     | 0     | 0 | 0     | 0     | 0     | 0     |
| kdm2a    | 0     | 0 | 0.12  | 0     | 0     | 0.12  | 0     | 0 | 0     | 0     | 0     | 0     |

|         |     |   |       |   |   |       |     |   |   |   |       |       |
|---------|-----|---|-------|---|---|-------|-----|---|---|---|-------|-------|
| prepl   | 0   | 0 | 0     | 0 | 0 | 0     | 0   | 0 | 0 | 0 | 0     | 0     |
| ctdnep1 | 0   | 0 | 0     | 0 | 0 | 0     | 0   | 0 | 0 | 0 | 0.119 | 0.117 |
| gpr65   | 0   | 0 | 0     | 0 | 0 | 0     | 0   | 0 | 0 | 0 | 0     | 0     |
| map4k2  | 0   | 0 | 0     | 0 | 0 | 0     | 0   | 0 | 0 | 0 | 0.113 | 0.112 |
| ms4a7   | 0   | 0 | 0     | 0 | 0 | 0     | 0   | 0 | 0 | 0 | 0     | 0     |
| lrch3   | 0   | 0 | 0     | 0 | 0 | 0     | 0   | 0 | 0 | 0 | 0     | 0     |
| ywhaq   | 0   | 0 | 0     | 0 | 0 | 0     | 0   | 0 | 0 | 0 | 0     | 0     |
| synm    | 0   | 0 | 0     | 0 | 0 | 0     | 0   | 0 | 0 | 0 | 0     | 0     |
| wash6p  | 0   | 0 | 0     | 0 | 0 | 0     | 0   | 0 | 0 | 0 | 0.11  | 0.11  |
| slc50a1 | 0   | 0 | 0     | 0 | 0 | 0     | 0   | 0 | 0 | 0 | 0     | 0     |
| trim3   | 0   | 0 | 0     | 0 | 0 | 0     | 0   | 0 | 0 | 0 | 0     | 0     |
| rxfp3   | 0   | 0 | 0     | 0 | 0 | 0     | 0   | 0 | 0 | 0 | 0     | 0     |
| itgbl1  | 0   | 0 | 0     | 0 | 0 | 0     | 0   | 0 | 0 | 0 | 0.108 | 0.107 |
| plagl1  | 0   | 0 | 0     | 0 | 0 | 0     | 0   | 0 | 0 | 0 | 0     | 0     |
| edc4    | 0   | 0 | 0     | 0 | 0 | 0     | 0   | 0 | 0 | 0 | 0     | 0     |
| rest    | 0   | 0 | 0     | 0 | 0 | 0     | 0   | 0 | 0 | 0 | 0     | 0     |
| tsks    | 0   | 0 | 0     | 0 | 0 | 0     | 0   | 0 | 0 | 0 | 0     | 0     |
| fgd1    | 0   | 0 | 0     | 0 | 0 | 0     | 0   | 0 | 0 | 0 | 0     | 0     |
| ulk2    | 0   | 0 | 0     | 0 | 0 | 0     | 0   | 0 | 0 | 0 | 0     | 0     |
| megf10  | 0   | 0 | 0.105 | 0 | 0 | 0.105 | 0   | 0 | 0 | 0 | 0     | 0     |
| vangl2  | 0   | 0 | 0.105 | 0 | 0 | 0.105 | 0   | 0 | 0 | 0 | 0     | 0     |
| atad3b  | 0   | 0 | 0.104 | 0 | 0 | 0.104 | 0   | 0 | 0 | 0 | 0     | 0     |
| tanc1   | 0   | 0 | 0     | 0 | 0 | 0     | 0   | 0 | 0 | 0 | 0.103 | 0.103 |
| ribc2   | 0   | 0 | 0     | 0 | 0 | 0     | 0   | 0 | 0 | 0 | 0.103 | 0.102 |
| ier3    | 0   | 0 | 0     | 0 | 0 | 0     | 0   | 0 | 0 | 0 | 0     | 0     |
| apod    | 0   | 0 | 0     | 0 | 0 | 0     | 0   | 0 | 0 | 0 | 0     | 0     |
| limd1   | 0   | 0 | 0     | 0 | 0 | 0     | 0   | 0 | 0 | 0 | 0.101 | 0.1   |
| mknk2   | 0.1 | 0 | 0     | 0 | 0 | 0     | 0.1 | 0 | 0 | 0 | 0     | 0     |
