# Supplementary material for: The RXFP3 receptor is functionally associated with cellular responses to oxidative stress and DNA damage
Source: publisher site journal article supplement (doi:10.18632/aging.102528), 2019-12-03
Supplement: Supplementary file [file aging-v11i23-102528-supplementary-material-SD14.pdf]

**Table S13. NetworkAnalyst-based Gene Ontology analysis of the RXFP3 interactome stabilized in the presence of CPT cellular perturbation (hypothalamic database).** The proteins consistently associated with the RXFP3 receptor following exposure to CPT were analyzed using a human hypothalamic tissue database derived from DIFFERENTIALNET (<http://netbio.bgu.ac.il/diffnet/>). For the most stringent analysis process we employed a Zero Order Network approach. Gene Ontology (Biological Process) annotation was performed on all identified nodes using the built-in Gene Ontology analysis module of NetworkAnalyst (<https://www.networkanalyst.ca>). For each significantly-populated Gene Ontology term group ( $p < 0.05$ ) the total number of proteins associated with that group (Total), the expected (Expected) number of identified proteins from a random data sample (Hypergeometric test based), the actual number of GO term-populating proteins from the experimental dataset (Hits), the enrichment P value (P.Value) as well as the enrichment FDR are given (FDR).

| GO Biological Process Term                                     | Total | Expected | Hits | P.Value  | FDR      |
|----------------------------------------------------------------|-------|----------|------|----------|----------|
| MRNA metabolic process                                         | 817   | 6.18     | 49   | 2.02E-32 | 1.66E-29 |
| Viral reproduction                                             | 803   | 6.07     | 45   | 3.20E-28 | 1.31E-25 |
| Cellular macromolecule catabolic process                       | 849   | 6.42     | 44   | 4.00E-26 | 1.09E-23 |
| Viral reproductive process                                     | 597   | 4.51     | 38   | 1.72E-25 | 3.53E-23 |
| Macromolecule catabolic process                                | 1070  | 8.1      | 44   | 4.92E-22 | 6.73E-20 |
| Macromolecule catabolic process                                | 1070  | 8.1      | 44   | 4.92E-22 | 6.73E-20 |
| Translational initiation                                       | 205   | 1.55     | 23   | 7.27E-21 | 8.52E-19 |
| Viral infectious cycle                                         | 241   | 1.82     | 23   | 2.97E-19 | 3.05E-17 |
| Cellular component disassembly                                 | 310   | 2.34     | 24   | 6.08E-18 | 5.23E-16 |
| Protein targeting to membrane                                  | 158   | 1.19     | 19   | 6.38E-18 | 5.23E-16 |
| Cellular protein complex disassembly                           | 160   | 1.21     | 19   | 8.13E-18 | 6.06E-16 |
| Protein complex disassembly                                    | 167   | 1.26     | 19   | 1.85E-17 | 1.18E-15 |
| RNA catabolic process                                          | 256   | 1.94     | 22   | 1.87E-17 | 1.18E-15 |
| Multi organism process                                         | 1710  | 12.9     | 48   | 2.53E-17 | 1.48E-15 |
| Macromolecular complex disassembly                             | 189   | 1.43     | 19   | 1.93E-16 | 1.06E-14 |
| Translation                                                    | 698   | 5.28     | 31   | 3.71E-16 | 1.90E-14 |
| Protein targeting                                              | 545   | 4.12     | 27   | 3.10E-15 | 1.50E-13 |
| DNA damage response, signal transduction by p53 class mediator | 117   | 0.884    | 15   | 9.22E-15 | 4.20E-13 |
| Signal transduction in response to DNA damage                  | 129   | 0.975    | 15   | 4.06E-14 | 1.75E-12 |
| Intracellular protein transport                                | 793   | 5.99     | 30   | 8.78E-14 | 3.60E-12 |
| Cellular nitrogen compound catabolic process                   | 986   | 7.45     | 33   | 1.17E-13 | 4.57E-12 |
| Cellular catabolic process                                     | 2140  | 16.2     | 48   | 2.11E-13 | 7.87E-12 |
| Reproductive process                                           | 1740  | 13.2     | 42   | 1.35E-12 | 4.81E-11 |
| Reproduction                                                   | 1860  | 14       | 43   | 2.34E-12 | 7.99E-11 |
| DNA damage checkpoint                                          | 143   | 1.08     | 14   | 3.32E-12 | 1.09E-10 |
| S phase of mitotic cell cycle                                  | 144   | 1.09     | 14   | 3.66E-12 | 1.15E-10 |
| G1/S transition of mitotic cell cycle                          | 209   | 1.58     | 16   | 3.85E-12 | 1.17E-10 |
| Mitotic cell cycle checkpoint                                  | 149   | 1.13     | 14   | 5.85E-12 | 1.71E-10 |

|                                                           |      |       |    |          |          |
|-----------------------------------------------------------|------|-------|----|----------|----------|
| DNA integrity checkpoint                                  | 152  | 1.15  | 14 | 7.69E-12 | 2.17E-10 |
| S phase                                                   | 153  | 1.16  | 14 | 8.41E-12 | 2.30E-10 |
| RNA processing                                            | 890  | 6.73  | 29 | 1.03E-11 | 2.72E-10 |
| Cellular protein metabolic process                        | 4540 | 34.3  | 68 | 2.32E-11 | 5.95E-10 |
| Catabolic process                                         | 2560 | 19.4  | 49 | 4.07E-11 | 1.01E-09 |
| Protein polyubiquitination                                | 177  | 1.34  | 14 | 6.07E-11 | 1.46E-09 |
| Interphase of mitotic cell cycle                          | 435  | 3.29  | 20 | 7.55E-11 | 1.77E-09 |
| Interphase                                                | 443  | 3.35  | 20 | 1.04E-10 | 2.38E-09 |
| Establishment of protein localization                     | 1460 | 11    | 35 | 2.22E-10 | 4.92E-09 |
| Cell cycle checkpoint                                     | 281  | 2.12  | 16 | 3.29E-10 | 7.09E-09 |
| Ribosome biogenesis                                       | 166  | 1.25  | 13 | 3.47E-10 | 7.19E-09 |
| Protein transport                                         | 1400 | 10.6  | 34 | 3.51E-10 | 7.19E-09 |
| RRNA processing                                           | 109  | 0.824 | 11 | 5.67E-10 | 1.13E-08 |
| Intracellular transport                                   | 1510 | 11.4  | 35 | 6.00E-10 | 1.17E-08 |
| RRNA metabolic process                                    | 118  | 0.892 | 11 | 1.34E-09 | 2.55E-08 |
| Negative regulation of cellular protein metabolic process | 463  | 3.5   | 19 | 1.60E-09 | 2.94E-08 |
| Cellular protein catabolic process                        | 518  | 3.92  | 20 | 1.62E-09 | 2.94E-08 |
| Interaction with host                                     | 426  | 3.22  | 18 | 2.87E-09 | 5.11E-08 |
| Protein localization                                      | 1850 | 14    | 37 | 9.52E-09 | 1.66E-07 |
| Regulation of apoptotic process                           | 1540 | 11.6  | 33 | 1.50E-08 | 2.55E-07 |
| Negative regulation of protein metabolic process          | 540  | 4.08  | 19 | 1.97E-08 | 3.27E-07 |
| Regulation of programmed cell death                       | 1550 | 11.7  | 33 | 1.99E-08 | 3.27E-07 |
| Protein folding                                           | 241  | 1.82  | 13 | 3.23E-08 | 5.19E-07 |
| Positive regulation of cellular protein metabolic process | 968  | 7.32  | 25 | 4.16E-08 | 6.55E-07 |
| Macromolecule localization                                | 2240 | 16.9  | 40 | 4.99E-08 | 7.73E-07 |
| Regulation of mitotic cell cycle                          | 351  | 2.65  | 15 | 5.87E-08 | 8.92E-07 |
| Protein catabolic process                                 | 644  | 4.87  | 20 | 6.30E-08 | 9.40E-07 |
| Positive regulation of protein metabolic process          | 1080 | 8.19  | 26 | 9.09E-08 | 1.33E-06 |
| Amine metabolic process                                   | 268  | 2.03  | 13 | 1.12E-07 | 1.61E-06 |
| Ribonucleoprotein complex biogenesis                      | 269  | 2.03  | 13 | 1.17E-07 | 1.65E-06 |
| Cell cycle arrest                                         | 428  | 3.24  | 16 | 1.29E-07 | 1.78E-06 |
| Protein metabolic process                                 | 5570 | 42.1  | 69 | 1.30E-07 | 1.78E-06 |
| Negative regulation of cellular metabolic process         | 1660 | 12.6  | 32 | 3.60E-07 | 4.84E-06 |
| Regulation of cellular protein metabolic process          | 1560 | 11.8  | 30 | 9.26E-07 | 1.22E-05 |
| Establishment of localization in cell                     | 2320 | 17.5  | 38 | 1.16E-06 | 1.49E-05 |
| Negative regulation of catalytic activity                 | 568  | 4.29  | 17 | 1.16E-06 | 1.49E-05 |
| Response to DNA damage stimulus                           | 862  | 6.52  | 21 | 1.59E-06 | 2.00E-05 |
| Cellular localization                                     | 2650 | 20.1  | 41 | 1.68E-06 | 2.09E-05 |
| Negative regulation of cell cycle                         | 520  | 3.93  | 16 | 1.74E-06 | 2.10E-05 |
| Positive regulation of protein modification process       | 867  | 6.55  | 21 | 1.74E-06 | 2.10E-05 |

|                                                                         |      |       |    |          |          |
|-------------------------------------------------------------------------|------|-------|----|----------|----------|
| Mitotic cell cycle                                                      | 968  | 7.32  | 22 | 2.70E-06 | 3.16E-05 |
| Negative regulation of metabolic process                                | 1820 | 13.8  | 32 | 2.70E-06 | 3.16E-05 |
| RNA splicing                                                            | 478  | 3.61  | 15 | 2.97E-06 | 3.43E-05 |
| Apoptotic process                                                       | 2130 | 16.1  | 35 | 3.53E-06 | 3.96E-05 |
| Apoptotic process                                                       | 2130 | 16.1  | 35 | 3.53E-06 | 3.96E-05 |
| Positive regulation of catalytic activity                               | 1070 | 8.08  | 23 | 3.86E-06 | 4.28E-05 |
| Cell cycle phase                                                        | 1070 | 8.11  | 23 | 4.11E-06 | 4.50E-05 |
| Programmed cell death                                                   | 2160 | 16.3  | 35 | 4.71E-06 | 5.08E-05 |
| RNA splicing, via transesterification reactions                         | 321  | 2.43  | 12 | 5.45E-06 | 5.81E-05 |
| Regulation of protein metabolic process                                 | 1820 | 13.8  | 31 | 8.21E-06 | 8.63E-05 |
| Regulation of cell cycle                                                | 886  | 6.7   | 20 | 9.19E-06 | 9.54E-05 |
| MRNA processing                                                         | 551  | 4.16  | 15 | 1.64E-05 | 0.000168 |
| Protein ubiquitination                                                  | 658  | 4.97  | 16 | 3.34E-05 | 0.000338 |
| Regulation of translation                                               | 228  | 1.72  | 9  | 5.70E-05 | 0.00057  |
| Proteolysis                                                             | 1100 | 8.28  | 21 | 6.09E-05 | 0.000602 |
| Regulation of catalytic activity                                        | 1730 | 13.1  | 28 | 6.37E-05 | 0.000621 |
| Protein modification by small protein conjugation                       | 713  | 5.39  | 16 | 8.67E-05 | 0.000836 |
| Cell cycle process                                                      | 1420 | 10.7  | 24 | 0.000117 | 0.00111  |
| Regulation of protein modification process                              | 1250 | 9.43  | 22 | 0.000137 | 0.00129  |
| Cellular amino acid metabolic process                                   | 670  | 5.06  | 15 | 0.000151 | 0.00139  |
| Cellular amino acid metabolic process                                   | 670  | 5.06  | 15 | 0.000151 | 0.00139  |
| Nucleocytoplasmic transport                                             | 388  | 2.93  | 11 | 0.000168 | 0.00153  |
| Nuclear transport                                                       | 392  | 2.96  | 11 | 0.000183 | 0.00165  |
| Intracellular steroid hormone receptor signaling pathway                | 113  | 0.854 | 6  | 0.000213 | 0.0019   |
| RNA metabolic process                                                   | 6010 | 45.5  | 64 | 0.000229 | 0.00202  |
| Cellular component disassembly involved in execution phase of apoptosis | 78   | 0.59  | 5  | 0.000306 | 0.00267  |
| Positive regulation of cellular metabolic process                       | 2530 | 19.1  | 34 | 0.000336 | 0.0029   |
| Cellular response to stress                                             | 1620 | 12.3  | 25 | 0.000377 | 0.00322  |
| Nucleobase containing compound metabolic process                        | 8180 | 61.8  | 79 | 0.000428 | 0.00358  |
| Nucleobase containing compound metabolic process                        | 8180 | 61.8  | 79 | 0.000428 | 0.00358  |
| Protein export from nucleus                                             | 48   | 0.363 | 4  | 0.000465 | 0.00385  |
| Positive regulation of translation                                      | 56   | 0.423 | 4  | 0.000838 | 0.00687  |
| Intracellular receptor mediated signaling pathway                       | 270  | 2.04  | 8  | 0.00101  | 0.00821  |
| Apoptotic DNA fragmentation                                             | 27   | 0.204 | 3  | 0.00108  | 0.00865  |
| Positive regulation of metabolic process                                | 2690 | 20.3  | 34 | 0.00109  | 0.00868  |
| Cell cycle                                                              | 1860 | 14.1  | 26 | 0.00121  | 0.00954  |
| Heterocycle metabolic process                                           | 8430 | 63.7  | 79 | 0.00151  | 0.0118   |
| Androgen receptor signaling pathway                                     | 67   | 0.506 | 4  | 0.00164  | 0.0127   |
| Cellular aromatic compound metabolic process                            | 8460 | 63.9  | 79 | 0.00169  | 0.013    |
| Regulation of molecular function                                        | 2250 | 17    | 29 | 0.00209  | 0.0159   |

|                                                                                  |      |       |    |         |        |
|----------------------------------------------------------------------------------|------|-------|----|---------|--------|
| Apoptotic nuclear changes                                                        | 35   | 0.265 | 3  | 0.00231 | 0.0173 |
| Negative regulation of cellular process                                          | 4110 | 31    | 45 | 0.00264 | 0.0197 |
| Intrinsic apoptotic signaling pathway                                            | 135  | 1.02  | 5  | 0.00358 | 0.0265 |
| Negative regulation of growth                                                    | 197  | 1.49  | 6  | 0.00381 | 0.0279 |
| Nuclear export                                                                   | 139  | 1.05  | 5  | 0.00406 | 0.0294 |
| Protein import                                                                   | 272  | 2.06  | 7  | 0.00457 | 0.0328 |
| Activation of cysteine type endopeptidase activity involved in apoptotic process | 91   | 0.688 | 4  | 0.00499 | 0.0355 |
| G2/M transition of mitotic cell cycle                                            | 150  | 1.13  | 5  | 0.00559 | 0.0395 |
| Mitochondrial transport                                                          | 159  | 1.2   | 5  | 0.00713 | 0.0499 |
| Protein import into nucleus                                                      | 228  | 1.72  | 6  | 0.00767 | 0.0533 |
| Nuclear import                                                                   | 232  | 1.75  | 6  | 0.00832 | 0.0573 |
| Mitochondrion organization                                                       | 306  | 2.31  | 7  | 0.00854 | 0.0583 |
