# Supplementary material for: The RXFP3 receptor is functionally associated with cellular responses to oxidative stress and DNA damage
Source: publisher site journal article supplement (doi:10.18632/aging.102528), 2019-12-03
Supplement: Supplementary file [file aging-v11i23-102528-supplementary-material-SD15.pdf]

**Table S14. NetworkAnalyst-based Gene Ontology analysis of the RXFP3 interactome stabilized in the presence of peroxide cellular perturbation (generic database).** The proteins consistently associated with the RXFP3 receptor following exposure to hydrogen peroxide were analyzed using a generic human tissue database derived from IMEx (<https://www.imexconsortium.org/>). For the most stringent analysis process we employed a Zero Order Network approach. Gene Ontology (Biological Process) annotation was performed on all identified nodes using the built-in Gene Ontology analysis module of NetworkAnalyst (<https://www.networkanalyst.ca>). For each significantly-populated Gene Ontology term group ( $p < 0.05$ ) the total number of proteins associated with that group (Total), the expected (Expected) number of identified proteins from a random data sample (Hypergeometric test based), the actual number of GO term-populating proteins from the experimental dataset (Hits), the enrichment P value (P.Value) as well as the enrichment FDR are given (FDR).

| GO Biological Process Term                   | Total | Expected | Hits | P.Value  | FDR      |
|----------------------------------------------|-------|----------|------|----------|----------|
| MRNA metabolic process                       | 817   | 7.09     | 61   | 8.99E-43 | 7.37E-40 |
| Cellular protein complex disassembly         | 160   | 1.39     | 34   | 1.75E-38 | 7.19E-36 |
| Protein complex disassembly                  | 167   | 1.45     | 34   | 8.54E-38 | 2.34E-35 |
| Macromolecular complex disassembly           | 189   | 1.64     | 34   | 7.84E-36 | 1.61E-33 |
| Protein targeting to membrane                | 158   | 1.37     | 32   | 1.85E-35 | 3.03E-33 |
| Translational initiation                     | 205   | 1.78     | 34   | 1.46E-34 | 2.00E-32 |
| Cellular component disassembly               | 310   | 2.69     | 37   | 3.14E-32 | 3.68E-30 |
| Cellular macromolecule catabolic process     | 849   | 7.37     | 51   | 2.43E-30 | 2.49E-28 |
| RNA catabolic process                        | 256   | 2.22     | 33   | 8.70E-30 | 7.93E-28 |
| Viral reproductive process                   | 597   | 5.18     | 44   | 1.58E-29 | 1.30E-27 |
| Viral reproduction                           | 803   | 6.97     | 48   | 2.78E-28 | 2.08E-26 |
| Viral infectious cycle                       | 241   | 2.09     | 31   | 6.23E-28 | 4.26E-26 |
| Macromolecule catabolic process              | 1070  | 9.29     | 51   | 1.42E-25 | 8.33E-24 |
| Macromolecule catabolic process              | 1070  | 9.29     | 51   | 1.42E-25 | 8.33E-24 |
| Protein targeting                            | 545   | 4.73     | 38   | 1.98E-24 | 1.08E-22 |
| Translation                                  | 698   | 6.06     | 40   | 1.40E-22 | 7.17E-21 |
| Intracellular protein transport              | 793   | 6.88     | 40   | 1.49E-20 | 7.19E-19 |
| Cellular nitrogen compound catabolic process | 986   | 8.56     | 43   | 9.43E-20 | 4.30E-18 |
| Multi organism process                       | 1710  | 14.8     | 52   | 2.58E-17 | 1.11E-15 |
| Cellular catabolic process                   | 2140  | 18.6     | 58   | 3.57E-17 | 1.47E-15 |
| Intracellular transport                      | 1510  | 13.1     | 47   | 7.80E-16 | 3.04E-14 |
| Catabolic process                            | 2560  | 22.3     | 61   | 1.61E-15 | 6.01E-14 |
| Establishment of protein localization        | 1460  | 12.6     | 44   | 2.81E-14 | 1.00E-12 |
| Protein transport                            | 1400  | 12.2     | 43   | 3.71E-14 | 1.27E-12 |
| Reproductive process                         | 1740  | 15.1     | 46   | 8.60E-13 | 2.82E-11 |
| Reproduction                                 | 1860  | 16.1     | 47   | 1.87E-12 | 5.89E-11 |
| Establishment of localization in cell        | 2320  | 20.1     | 53   | 2.00E-12 | 6.09E-11 |
| Protein localization                         | 1850  | 16       | 46   | 6.66E-12 | 1.95E-10 |

|                                                                |      |       |    |          |          |
|----------------------------------------------------------------|------|-------|----|----------|----------|
| Cellular localization                                          | 2650 | 23    | 56 | 8.78E-12 | 2.48E-10 |
| DNA damage response, signal transduction by p53 class mediator | 117  | 1.02  | 12 | 3.78E-10 | 1.03E-08 |
| Protein polyubiquitination                                     | 177  | 1.54  | 14 | 3.98E-10 | 1.05E-08 |
| Macromolecule localization                                     | 2240 | 19.5  | 48 | 4.16E-10 | 1.07E-08 |
| Signal transduction in response to DNA damage                  | 129  | 1.12  | 12 | 1.18E-09 | 2.94E-08 |
| Cellular protein metabolic process                             | 4540 | 39.4  | 72 | 1.24E-09 | 2.98E-08 |
| Ribonucleoprotein complex biogenesis                           | 269  | 2.33  | 16 | 1.41E-09 | 3.30E-08 |
| G1/S transition of mitotic cell cycle                          | 209  | 1.81  | 14 | 3.51E-09 | 7.99E-08 |
| DNA damage checkpoint                                          | 143  | 1.24  | 12 | 3.88E-09 | 8.59E-08 |
| S phase of mitotic cell cycle                                  | 144  | 1.25  | 12 | 4.20E-09 | 9.06E-08 |
| Mitotic cell cycle checkpoint                                  | 149  | 1.29  | 12 | 6.20E-09 | 1.30E-07 |
| DNA integrity checkpoint                                       | 152  | 1.32  | 12 | 7.77E-09 | 1.59E-07 |
| S phase                                                        | 153  | 1.33  | 12 | 8.37E-09 | 1.67E-07 |
| Negative regulation of cellular protein metabolic process      | 463  | 4.02  | 19 | 1.72E-08 | 3.36E-07 |
| RNA splicing, via transesterification reactions                | 321  | 2.79  | 16 | 1.76E-08 | 3.36E-07 |
| Interphase of mitotic cell cycle                               | 435  | 3.78  | 18 | 3.75E-08 | 6.99E-07 |
| Interphase                                                     | 443  | 3.84  | 18 | 4.95E-08 | 9.02E-07 |
| Protein folding                                                | 241  | 2.09  | 13 | 1.69E-07 | 3.02E-06 |
| Negative regulation of protein metabolic process               | 540  | 4.69  | 19 | 1.95E-07 | 3.39E-06 |
| RNA processing                                                 | 890  | 7.72  | 24 | 5.65E-07 | 9.66E-06 |
| RNA splicing                                                   | 478  | 4.15  | 17 | 7.88E-07 | 1.32E-05 |
| Cell cycle checkpoint                                          | 281  | 2.44  | 13 | 9.77E-07 | 1.60E-05 |
| MRNA processing                                                | 551  | 4.78  | 18 | 1.24E-06 | 1.99E-05 |
| Ribonucleoprotein complex assembly                             | 124  | 1.08  | 9  | 1.28E-06 | 2.02E-05 |
| Regulation of mitotic cell cycle                               | 351  | 3.05  | 14 | 2.13E-06 | 3.29E-05 |
| Protein metabolic process                                      | 5570 | 48.3  | 74 | 2.28E-06 | 3.46E-05 |
| Cellular protein catabolic process                             | 518  | 4.5   | 17 | 2.37E-06 | 3.53E-05 |
| Ribosome biogenesis                                            | 166  | 1.44  | 9  | 1.41E-05 | 0.000206 |
| Interaction with host                                          | 426  | 3.7   | 14 | 1.94E-05 | 0.000279 |
| Amine metabolic process                                        | 268  | 2.33  | 11 | 2.14E-05 | 0.000303 |
| Negative regulation of cellular metabolic process              | 1660 | 14.4  | 31 | 2.59E-05 | 0.00036  |
| Protein catabolic process                                      | 644  | 5.59  | 17 | 4.04E-05 | 0.000553 |
| Response to DNA damage stimulus                                | 862  | 7.48  | 20 | 5.01E-05 | 0.000674 |
| RNA metabolic process                                          | 6010 | 52.2  | 74 | 5.58E-05 | 0.000737 |
| Actin filament based movement                                  | 78   | 0.677 | 6  | 5.83E-05 | 0.000759 |
| Negative regulation of metabolic process                       | 1820 | 15.8  | 32 | 5.96E-05 | 0.000764 |
| Macromolecular complex assembly                                | 1120 | 9.74  | 23 | 8.71E-05 | 0.00109  |
| Cell cycle arrest                                              | 428  | 3.71  | 13 | 8.75E-05 | 0.00109  |
| Cell cycle phase                                               | 1070 | 9.31  | 22 | 0.000127 | 0.00155  |
| Cellular component assembly                                    | 1790 | 15.5  | 30 | 0.000248 | 0.00299  |
| Positive regulation of catalytic activity                      | 1070 | 9.28  | 21 | 0.00033  | 0.00393  |

|                                                                                  |      |       |    |          |         |
|----------------------------------------------------------------------------------|------|-------|----|----------|---------|
| RRNA processing                                                                  | 109  | 0.946 | 6  | 0.00037  | 0.00433 |
| Negative regulation of catalytic activity                                        | 568  | 4.93  | 14 | 0.000408 | 0.00471 |
| Cell cycle process                                                               | 1420 | 12.3  | 25 | 0.000424 | 0.00483 |
| Nucleobase containing compound metabolic process                                 | 8180 | 71    | 89 | 0.000554 | 0.00614 |
| Nucleobase containing compound metabolic process                                 | 8180 | 71    | 89 | 0.000554 | 0.00614 |
| RRNA metabolic process                                                           | 118  | 1.02  | 6  | 0.000565 | 0.00617 |
| Protein ubiquitination                                                           | 658  | 5.71  | 15 | 0.000572 | 0.00617 |
| Negative regulation of cell cycle                                                | 520  | 4.51  | 13 | 0.00058  | 0.00618 |
| Regulation of apoptotic process                                                  | 1540 | 13.3  | 26 | 0.000608 | 0.0064  |
| Regulation of cell cycle                                                         | 886  | 7.69  | 18 | 0.000624 | 0.00647 |
| Mitotic cell cycle                                                               | 968  | 8.4   | 19 | 0.000663 | 0.00679 |
| Regulation of programmed cell death                                              | 1550 | 13.5  | 26 | 0.000725 | 0.00734 |
| Proteolysis                                                                      | 1100 | 9.5   | 20 | 0.00116  | 0.0116  |
| Protein modification by small protein conjugation                                | 713  | 6.19  | 15 | 0.00129  | 0.0128  |
| Positive regulation of cellular protein metabolic process                        | 968  | 8.4   | 18 | 0.00171  | 0.0167  |
| Transport                                                                        | 4830 | 42    | 58 | 0.00184  | 0.0178  |
| Heterocycle metabolic process                                                    | 8430 | 73.2  | 89 | 0.00207  | 0.0198  |
| Cell cycle                                                                       | 1860 | 16.1  | 28 | 0.00225  | 0.0212  |
| Cellular aromatic compound metabolic process                                     | 8460 | 73.4  | 89 | 0.00234  | 0.0218  |
| Positive regulation of protein metabolic process                                 | 1080 | 9.4   | 19 | 0.00246  | 0.0227  |
| Establishment of localization                                                    | 4910 | 42.6  | 58 | 0.0028   | 0.0255  |
| Cellular response to stress                                                      | 1620 | 14.1  | 25 | 0.00303  | 0.0273  |
| Positive regulation of protein modification process                              | 867  | 7.52  | 16 | 0.00337  | 0.03    |
| Spliceosomal complex assembly                                                    | 39   | 0.338 | 3  | 0.00464  | 0.0409  |
| Chromatin assembly                                                               | 128  | 1.11  | 5  | 0.00514  | 0.0448  |
| Regulation of cellular protein metabolic process                                 | 1560 | 13.5  | 23 | 0.00745  | 0.0643  |
| Apoptotic process                                                                | 2130 | 18.5  | 29 | 0.00792  | 0.0669  |
| Apoptotic process                                                                | 2130 | 18.5  | 29 | 0.00792  | 0.0669  |
| Activation of cysteine type endopeptidase activity involved in apoptotic process | 91   | 0.79  | 4  | 0.00808  | 0.0676  |
| Programmed cell death                                                            | 2160 | 18.7  | 29 | 0.0094   | 0.0779  |
| G2/M transition of mitotic cell cycle                                            | 150  | 1.3   | 5  | 0.00989  | 0.0811  |
| Chromatin assembly or disassembly                                                | 152  | 1.32  | 5  | 0.0104   | 0.0847  |
| Actin filament based process                                                     | 577  | 5.01  | 11 | 0.0117   | 0.0938  |
| Mitochondrial transport                                                          | 159  | 1.38  | 5  | 0.0125   | 0.0995  |
| Regulation of catalytic activity                                                 | 1730 | 15    | 24 | 0.0132   | 0.104   |
| Cellular amino acid metabolic process                                            | 670  | 5.81  | 12 | 0.0135   | 0.105   |
| Cellular amino acid metabolic process                                            | 670  | 5.81  | 12 | 0.0135   | 0.105   |
| Regulation of translation                                                        | 228  | 1.98  | 6  | 0.0145   | 0.111   |
| Protein polymerization                                                           | 167  | 1.45  | 5  | 0.0152   | 0.115   |
| Nucleosome assembly                                                              | 112  | 0.972 | 4  | 0.0164   | 0.123   |
| DNA packaging                                                                    | 172  | 1.49  | 5  | 0.017    | 0.127   |

|                                                                                           |      |       |    |        |       |
|-------------------------------------------------------------------------------------------|------|-------|----|--------|-------|
| Positive regulation of cysteine type endopeptidase activity involved in apoptotic process | 118  | 1.02  | 4  | 0.0194 | 0.144 |
| Cellular membrane organization                                                            | 471  | 4.09  | 9  | 0.0215 | 0.157 |
| Regulation of protein modification process                                                | 1250 | 10.8  | 18 | 0.0221 | 0.16  |
| Apoptotic DNA fragmentation                                                               | 27   | 0.234 | 2  | 0.0228 | 0.163 |
| Negative regulation of translation                                                        | 70   | 0.608 | 3  | 0.0229 | 0.163 |
| Protein targeting to mitochondrion                                                        | 71   | 0.616 | 3  | 0.0238 | 0.168 |
| Protein stabilization                                                                     | 72   | 0.625 | 3  | 0.0247 | 0.173 |
| Negative regulation of cellular process                                                   | 4110 | 35.6  | 46 | 0.0266 | 0.185 |
| Cytoskeleton dependent intracellular transport                                            | 76   | 0.66  | 3  | 0.0284 | 0.195 |
| Cellular protein complex assembly                                                         | 343  | 2.98  | 7  | 0.0299 | 0.205 |
