# Supplementary material for: The RXFP3 receptor is functionally associated with cellular responses to oxidative stress and DNA damage
Source: publisher site journal article supplement (doi:10.18632/aging.102528), 2019-12-03
Supplement: Supplementary file [file aging-v11i23-102528-supplementary-material-SD17.pdf]

**Table S16. NetworkAnalyst-based KEGG pathway analysis of the RXFP3 interactome stabilized in the presence of peroxide cellular perturbation (generic database).** The proteins consistently associated with the RXFP3 receptor following exposure to hydrogen peroxide were analyzed using a generic human tissue database derived from IMEx (<https://www.imexconsortium.org/>). For the most stringent analysis process we employed a Zero Order Network approach. KEGG signaling pathway annotation was performed on all identified nodes using the built-in KEGG Pathway analysis module of NetworkAnalyst ([www.networkanalyst.ca](http://www.networkanalyst.ca)). For each significantly-populated KEGG Pathway ( $p < 0.05$ ) the total number of proteins associated with that group (Total), the expected (Expected) number of identified proteins from a random data sample (Hypergeometric test based), the actual number of GO term-populating proteins from the experimental dataset (Hits), the enrichment P value (P.Value) as well as the enrichment FDR are given (FDR).

| KEGG Pathway                                    | Total | Expected | Hits | P.Value  | FDR      |
|-------------------------------------------------|-------|----------|------|----------|----------|
| Ribosome                                        | 153   | 2.18     | 32   | 1.56E-29 | 4.95E-27 |
| Proteasome                                      | 45    | 0.64     | 10   | 4.69E-10 | 7.46E-08 |
| Pathogenic Escherichia coli infection           | 55    | 0.782    | 7    | 1.12E-05 | 0.00119  |
| Spliceosome                                     | 134   | 1.91     | 10   | 1.87E-05 | 0.00149  |
| Systemic lupus erythematosus                    | 133   | 1.89     | 9    | 0.000107 | 0.00681  |
| Protein processing in endoplasmic reticulum     | 165   | 2.35     | 9    | 0.00054  | 0.0286   |
| Antigen processing and presentation             | 77    | 1.09     | 6    | 0.000753 | 0.0342   |
| Tight junction                                  | 170   | 2.42     | 8    | 0.00282  | 0.112    |
| Longevity regulating pathway - multiple species | 62    | 0.881    | 4    | 0.0115   | 0.405    |
| Prion diseases                                  | 35    | 0.498    | 3    | 0.0132   | 0.418    |
| Salmonella infection                            | 86    | 1.22     | 4    | 0.0338   | 0.976    |
| Mismatch repair                                 | 23    | 0.327    | 2    | 0.0417   | 1        |
| Legionellosis                                   | 55    | 0.782    | 3    | 0.043    | 1        |
