# Supplementary material for: The RXFP3 receptor is functionally associated with cellular responses to oxidative stress and DNA damage
Source: publisher site journal article supplement (doi:10.18632/aging.102528), 2019-12-03
Supplement: Supplementary file [file aging-v11i23-102528-supplementary-material-SD18.pdf]

**Table S17. NetworkAnalyst-based KEGG pathway analysis of the RXFP3 interactome stabilized in the presence of peroxide cellular perturbation (hypothalamic database).** The proteins consistently associated with the RXFP3 receptor following exposure to hydrogen peroxide were analyzed using a human hypothalamic tissue database derived from DIFFERENTIALNET (<http://netbio.bgu.ac.il/diffnet/>). For the most stringent analysis process we employed a Zero Order Network approach. KEGG signaling pathway annotation was performed on all identified nodes using the built-in KEGG Pathway analysis module of NetworkAnalyst ([www.networkanalyst.ca](http://www.networkanalyst.ca)). For each significantly-populated KEGG Pathway ( $p < 0.05$ ) the total number of proteins associated with that group (Total), the expected (Expected) number of identified proteins from a random data sample (Hypergeometric test based), the actual number of GO term-populating proteins from the experimental dataset (Hits), the enrichment P value (P.Value) as well as the enrichment FDR are given (FDR).

| KEGG Pathway                                    | Total | Expected | Hits | P.Value  | FDR      |
|-------------------------------------------------|-------|----------|------|----------|----------|
| Ribosome                                        | 153   | 1.48     | 15   | 1.14E-11 | 3.62E-09 |
| Pathogenic Escherichia coli infection           | 55    | 0.533    | 7    | 8.47E-07 | 0.000135 |
| Protein processing in endoplasmic reticulum     | 165   | 1.6      | 9    | 2.76E-05 | 0.00292  |
| Proteasome                                      | 45    | 0.436    | 5    | 6.75E-05 | 0.00537  |
| Antigen processing and presentation             | 77    | 0.746    | 6    | 9.32E-05 | 0.00593  |
| Tight junction                                  | 170   | 1.65     | 8    | 0.000222 | 0.0118   |
| Spliceosome                                     | 134   | 1.3      | 7    | 0.000298 | 0.0135   |
| Prion diseases                                  | 35    | 0.339    | 3    | 0.00458  | 0.182    |
| Salmonella infection                            | 86    | 0.834    | 4    | 0.0095   | 0.336    |
| Phagosome                                       | 152   | 1.47     | 5    | 0.0157   | 0.463    |
| Legionellosis                                   | 55    | 0.533    | 3    | 0.016    | 0.463    |
| Mismatch repair                                 | 23    | 0.223    | 2    | 0.0206   | 0.538    |
| Longevity regulating pathway - multiple species | 62    | 0.601    | 3    | 0.022    | 0.538    |
| Glycolysis / Gluconeogenesis                    | 68    | 0.659    | 3    | 0.028    | 0.635    |
| Cell cycle                                      | 124   | 1.2      | 4    | 0.0319   | 0.677    |
| Biosynthesis of amino acids                     | 75    | 0.727    | 3    | 0.0359   | 0.679    |
| Systemic lupus erythematosus                    | 133   | 1.29     | 4    | 0.0398   | 0.679    |
| Base excision repair                            | 33    | 0.32     | 2    | 0.0403   | 0.679    |
| RNA degradation                                 | 79    | 0.766    | 3    | 0.0409   | 0.679    |
| Estrogen signaling pathway                      | 138   | 1.34     | 4    | 0.0445   | 0.679    |
| Viral carcinogenesis                            | 201   | 1.95     | 5    | 0.045    | 0.679    |
| DNA replication                                 | 36    | 0.349    | 2    | 0.0473   | 0.679    |
| Hypertrophic cardiomyopathy (HCM)               | 85    | 0.824    | 3    | 0.0491   | 0.679    |
