# Supplementary material for: The RXFP3 receptor is functionally associated with cellular responses to oxidative stress and DNA damage
Source: publisher site journal article supplement (doi:10.18632/aging.102528), 2019-12-03
Supplement: Supplementary file [file aging-v11i23-102528-supplementary-material-SD20.pdf]

**Table S19. NetworkAnalyst-based KEGG pathway analysis of the RXFP3 interactome stabilized in the presence of CPT cellular perturbation (hypothalamic database).** The proteins consistently associated with the RXFP3 receptor following exposure to CPT were analyzed using a human hypothalamic tissue database derived from DIFFERENTIALNET (<http://netbio.bgu.ac.il/diffnet/>). For the most stringent analysis process we employed a Zero Order Network approach. KEGG signaling pathway annotation was performed on all identified nodes using the built-in KEGG Pathway analysis module of NetworkAnalyst ([www.networkanalyst.ca](http://www.networkanalyst.ca)). For each significantly-populated KEGG Pathway ( $p < 0.05$ ) the total number of proteins associated with that group (Total), the expected (Expected) number of identified proteins from a random data sample (Hypergeometric test based), the actual number of GO term-populating proteins from the experimental dataset (Hits), the enrichment P value (P.Value) as well as the enrichment FDR are given (FDR).

| Pathway                                     | Total | Expected | Hits | P.Value  | FDR      |
|---------------------------------------------|-------|----------|------|----------|----------|
| Proteasome                                  | 45    | 0.489    | 13   | 6.13E-16 | 1.95E-13 |
| Ribosome                                    | 153   | 1.66     | 19   | 1.51E-15 | 2.39E-13 |
| Antigen processing and presentation         | 77    | 0.836    | 7    | 1.80E-05 | 0.00191  |
| Protein processing in endoplasmic reticulum | 165   | 1.79     | 9    | 6.86E-05 | 0.00546  |
| Parkinson's disease                         | 142   | 1.54     | 6    | 0.00432  | 0.256    |
| Huntington's disease                        | 193   | 2.1      | 7    | 0.00483  | 0.256    |
| Epstein-Barr virus infection                | 201   | 2.18     | 7    | 0.00602  | 0.273    |
| RNA transport                               | 165   | 1.79     | 6    | 0.00887  | 0.353    |
| RNA degradation                             | 79    | 0.858    | 4    | 0.0105   | 0.37     |
| Spliceosome                                 | 134   | 1.45     | 5    | 0.015    | 0.477    |
| Pathogenic Escherichia coli infection       | 55    | 0.597    | 3    | 0.0216   | 0.572    |
| Legionellosis                               | 55    | 0.597    | 3    | 0.0216   | 0.572    |
| Cellular senescence                         | 160   | 1.74     | 5    | 0.0297   | 0.664    |
| Necroptosis                                 | 162   | 1.76     | 5    | 0.0311   | 0.664    |
| HTLV-I infection                            | 219   | 2.38     | 6    | 0.0313   | 0.664    |
| RNA polymerase                              | 31    | 0.337    | 2    | 0.0442   | 0.851    |
| Cell cycle                                  | 124   | 1.35     | 4    | 0.0455   | 0.851    |
