# Supplementary material for: The RXFP3 receptor is functionally associated with cellular responses to oxidative stress and DNA damage
Source: publisher site journal article supplement (doi:10.18632/aging.102528), 2019-12-03
Supplement: Supplementary file [file aging-v11i23-102528-supplementary-material-SD22.pdf]

**Table S21. GEN3VA disease signature lists.** To investigate the potential role for RXFP3 in aging, we extracted three disease signatures from GEN3VA (GENE Expression and Enrichment Vector Analyzer; <http://amp.pharm.mssm.edu/gen3va/>): ‘Aging’(found in GEN3VA under the name “Model of cerebral aging and Alzheimer's disease: temporal cortex”), ‘Schizophrenia’ (in GEN3VA “Schizophrenia: postmortem superior temporal cortex”) and ‘Aortic aneurysm’ (in GEN3VA “Abdominal aortic aneurysm”) the latter of which is used as a control, to assure the protein overlap between the GEN3VA signatures and our own RXFP3 interactome dataset is specific. GEN3VA is a web-based system enabling the integrative analysis of a collective of gene expression signatures identified and extracted from GEO. Allowing us to extract specific disease signatures, which we can compare to our own data.

| <b>Aging</b> | <b>Schizophrenia</b> | <b>Aortic aneurysm</b> |
|--------------|----------------------|------------------------|
| ACTB         | HBB                  | SOST                   |
| AFG3L2       | PTGDS                | KCNA5                  |
| AFTPH        | SUZ12P1              | FDCSP                  |
| AKAP11       | PTPRO                | MMP9                   |
| ALDOA        | COX1                 | ADAMDEC1               |
| ANK3         | TUBB2A               | MMP12                  |
| ANKRD17      | FTL                  | TCEAL2                 |
| AP3S1        | KIF5C                | IGKV4-1                |
| APP          | COX2                 | MS4A1                  |
| ARF4         | TUBB2B               | C16orf54               |
| ARHGAP21     | CCNI                 | CXCL13                 |
| ARL3         | PKD1P1               | MRAP2                  |
| ARNTL        | PEBP1                | ITGA10                 |
| ARPC1A       | NUMBL                | MYOC                   |
| ARPC3        | B2M                  | FOSB                   |
| ARPC5L       | LOC493754            | PLD5                   |
| ARPP19       | MTURN                | C10orf10               |
| ARPP21       | CNDP1                | CD5L                   |
| ARX          | TSPAN7               | SCRG1                  |
| ASH1L        | MAP2                 | IGLV1-36               |
| ASPHD1       | IGFBP7               | IL1B                   |

|          |          |              |
|----------|----------|--------------|
| ATP1A3   | RPSA     | CCR7         |
| ATP1B2   | TAMM41   | IGKV1OR2-108 |
| ATP2B1   | ALDOC    | CYP4B1       |
| ATP2B2   | NDRG1    | IGLV3-19     |
| ATP5C1   | GNB1     | CD83         |
| ATP5G1   | CDK2AP1  | CCL21        |
| ATP5G2   | DBI      | TIMP4        |
| ATP5G3   | FAM161B  | CCL4         |
| ATP5J    | CD63     | IRF8         |
| ATP5L    | CD9      | IL13RA2      |
| ATP6AP2  | SARAF    | CLEC5A       |
| ATXN1    | CARNS1   | PLN          |
| ATXN1L   | TUBB4A   | FAIM3        |
| ATXN7L3B | RPL41    | IGLV2-23     |
| BAI2     | ATP6VOC  | SUSD5        |
| BASP1    | CKB      | CLEC4M       |
| BCL11A   | PTPRZ1   | FAM46B       |
| BEX1     | ACTG1    | SELL         |
| BEX2     | PPDPF    | C15orf48     |
| BHLHE22  | TXNIP    | CD52         |
| BLCAP    | FTH1P5   | IGLJ3        |
| BMI1     | ITM2A    | TRBC1        |
| BRINP1   | PHYHIP   | CD2          |
| BTF3     | TF       | OLR1         |
| BZW2     | SLC1A3   | CASQ2        |
| C15orf61 | CAPNS1   | CD27         |
| C16orf52 | RPL39    | P2RX5        |
| CA11     | CCDC92   | KBTBD8       |
| CABP1    | PMP2     | ACADL        |
| CACNB4   | DDN      | IGHM         |
| CADM1    | SEPW1    | MYOCD        |
| CADM2    | ATP6V0E2 | MZB1         |

|         |           |           |
|---------|-----------|-----------|
| CALM2   | CNP       | FBP1      |
| CALM3   | AHCYL1    | LMOD1     |
| CAMK2A  | HMGN2     | NPTX2     |
| CAMK2G  | ETNPPL    | CXCL3     |
| CAMK2N1 | NCDN      | TIMD4     |
| CAMTA1  | GDI1      | IL2RG     |
| CAMTA2  | AQP4      | EGR2      |
| CAPZA2  | CPLX1     | TCL1A     |
| CCNDBP1 | ND2       | CNTN3     |
| CCT7    | ATP6      | HLA-DQA1  |
| CCT8    | GLDN      | CD79A     |
| CD81    | COX6A1    | BANK1     |
| CDC42   | RNASE1    | LAMP3     |
| CDKN1B  | AATK      | SASH3     |
| CHCHD2  | COX3      | RASGRP1   |
| CHMP2A  | RPLP1     | DPEP2     |
| CHN1    | APOE      | PLEK      |
| CITED2  | NPIPA1    | LINC01088 |
| CLTA    | LGALS1    | CCL8      |
| CLTC    | LINC00844 | P2RY13    |
| CNKS2   | FAM107A   | PVRIG     |
| COPS5   | SLC35E2B  | VAT1L     |
| COX7A2  | IPCEF1    | MXRA5     |
| CPEB2   | ERH       | LDOC1     |
| CRYAB   | PRKCA     | TMOD1     |
| CSDE1   | SERPINE2  | PLA2G7    |
| CSNK2B  | TTC38     | SLC7A5    |
| CSPG5   | NOM1      | RRM2      |
| CUL3    | APLP1     | PRUNE2    |
| CXXC5   | CRYM      | LCK       |
| DAZAP2  | WASF3     | RASL12    |
| DCTN3   | S100B     | MMP1      |

|          |            |         |
|----------|------------|---------|
| DDRGK1   | GSTM3      | APOC1   |
| DDX1     | GSN        | NAPSB   |
| DDX3X    | PAQR6      | VPREB3  |
| DDX5     | GABRB2     | RAC2    |
| DLG2     | GABBR1     | CXCL8   |
| DLGAP1   | GATC       | ACP5    |
| DNAJC6   | GFAP       | IL7R    |
| DPY30    | PTN        | HCAR3   |
| DPYSL2   | HSPB8      | SLC14A1 |
| DRG1     | NDRG4      | HSPB6   |
| DSTN     | UBC        | STAP1   |
| DYNC1I1  | C1orf61    | P2RY8   |
| DYNC1LI2 | PAIP2B     | CCR5    |
| DYNLL1   | PLD3       | CD180   |
| EEF1A2   | ZCCHC24    | LYZ     |
| EIF1B    | GLTSCR2    | NRIP3   |
| EIF3D    | IFITM2     | REEP1   |
| EIF3E    | SLC1A2     | BLNK    |
| EIF3K    | TNRC6C-AS1 | GAPT    |
| EIF4A2   | MAL        | IL2RB   |
| EIF4G2   | PRKCZ      | GPR18   |
| ELAVL2   | SNHG6      | RHOH    |
| ELAVL4   | B3GAT1     | FHL5    |
| ELMOD1   | FAM127A    | SLAMF8  |
| ENPP2    | PTMA       | IGKV1-5 |
| EPC2     | TPI1       | SLC12A8 |
| EPHA4    | GSTM1      | NCKAP1L |
| ESRRG    | SATB1      | GREM1   |
| EXOC3L2  | MEST       | MAOA    |
| FAM131B  | PRKACB     | CSDC2   |
| FAM155A  | TMEM258    | ITGA7   |
| FAU      | HPRT1      | NCEH1   |

|           |              |          |
|-----------|--------------|----------|
| FBXL16    | KLHL2        | PNMAL1   |
| FBXO11    | RPL36        | CD19     |
| FBXW7     | RPL35        | CLEC4G   |
| FEZ1      | ITM2B        | ICAM3    |
| FIS1      | PTP4A2       | SH3BGR   |
| FKBP1A    | COX5A        | IGLV1-40 |
| FMR1      | BRSK1        | THEMIS2  |
| FOLR1     | SKP1         | FMO2     |
| FOXG1     | FABP7        | GPR183   |
| FXYD7     | PLL          | CD300LF  |
| G3BP2     | EPB41L4A-AS1 | NLRC3    |
| GABARAPL2 | MYEOV2       | RPS6KA1  |
| GAD1      | GSTM2        | GALNT15  |
| GADD45A   | EIF1         | BTK      |
| GAP43     | CASC3        | MPEG1    |
| GGNBP2    | NISCH        | CCR1     |
| GJA1      | DAAM2        | TMEM35   |
| GLUL      | KIAA1598     | AMICA1   |
| GNAO1     | ENC1         | CD37     |
| GNAS      | PFDN5        | GPR65    |
| GPM6A     | SPARCL1      | FABP4    |
| GPR158    | SOX2-OT      | CD69     |
| GPRASP2   | NQO1         | FPR3     |
| GRIA2     | PPM1K        | PLA2G2D  |
| GTF2B     | ABHD17A      | TRAC     |
| H2AFZ     | KIF5A        | IL10RA   |
| HIF1A     | KIAA0430     | ISG20    |
| HINT1     | LOC100130429 | STAC     |
| HINT2     | DYNC112      | CD3D     |
| HMGB1     | COLCA1       | HMHA1    |
| HMGCS1    | CLSTN1       | ITGA8    |
| HMGN3     | MOBP         | DENND2D  |

|              |          |           |
|--------------|----------|-----------|
| HMP19        | ANP32B   | FRZB      |
| HNRNPK       | QDPR     | NPR1      |
| HOMER1       | MBP      | PDZRN4    |
| HSD17B10     | GABARAP  | CFP       |
| HSP90AA1     | SOWAHA   | ZNF385D   |
| ID4          | LRRC8A   | TNFRSF17  |
| IGDCC4       | ALDH9A1  | TREM2     |
| IGFBP2       | SDC4     | BCL2A1    |
| IGIP         | CEBPD    | DUSP4     |
| IRF2BP1      | PAQR8    | STAT4     |
| IRS2         | NARS     | CNN1      |
| KCMF1        | HYOU1    | NTF3      |
| KCNA2        | PLP1     | CKMT2     |
| KCNK12       | DGKZ     | HEY2      |
| KHDRBS3      | FMNL2    | CETP      |
| KIAA0894     | CLDN11   | CCL2      |
| KIF5B        | SLC39A10 | FIBIN     |
| KLF9         | RAP1GAP  | MBNL1-AS1 |
| KMT2E        | SYNPR    | C5orf46   |
| KRAS         | TMA7     | SNTA1     |
| LGR6         | DGCR2    | RAMP1     |
| LHX2         | ZNF665   | LILRB2    |
| LINC00461    | ANKRD37  | MNDA      |
| LINC00520    | ATP9A    | COL11A1   |
| LMO4         | APOBEC3C | CD86      |
| LOC101929897 | NPTXR    | SYK       |
| LPGAT1       | SDCBP    | FIGF      |
| LPPR4        | SPCS1    | IGSF6     |
| LRRC4B       | FTH1     | TMEM163   |
| LRRN3        | CCDC13   | NCF2      |
| LZTS3        | MBOAT7   | CSF2RB    |
| MAGED1       | SCG5     | BIN2      |

|          |          |          |
|----------|----------|----------|
| MAGI2    | CCDC152  | IGFBP6   |
| MAP1B    | TNS3     | TREM1    |
| MAPK6    | CHCHD10  | ITK      |
| MARCKS   | RB1CC1   | AIM1     |
| MARCKSL1 | SRGN     | CAPG     |
| MATR3    | COX8A    | PTGS2    |
| MDH1     | PODNL1   | EVI2B    |
| MEF2A    | PSD3     | VIT      |
| MEF2C    | OPHN1    | IGJ      |
| MEIS2    | STX1B    | CHMP4C   |
| MESDC1   | CBX7     | EFHD1    |
| MICAL2   | BEX4     | TMEM246  |
| MINK1    | OPALIN   | ANGPTL1  |
| MMADHC   | OAZ1     | PLAUR    |
| MPPED2   | Septin 7 | SYTL1    |
| MPV17L   | CCK      | CRISPLD1 |
| MRFAP1   | FGF13    | NTS      |
| MRPL33   | UGP2     | AOAH     |
| MT1F     | ACTR10   | FERMT3   |
| MT1G     | STX1A    | SNX10    |
| MT1H     | ABAT     | DENND1C  |
| MT1HL1   | GABRB1   | OSR1     |
| MT1X     | PKP4     | LTF      |
| MT2A     | TUBA3C   | ADIRF    |
| MXI1     | PPP2CB   | SLC29A3  |
| MYCBP2   | PDE2A    | PIK3AP1  |
| MYT1L    | KLK6     | FBLN5    |
| NAA20    | NPC2     | SLN      |
| NAE1     | ARL6IP1  | NXPH3    |
| NAP1L1   | PHACTR3  | MMP7     |
| NAV3     | USP11    | TCEAL7   |
| NBEA     | BEX5     | PPP1R3C  |

|         |              |           |
|---------|--------------|-----------|
| NCK2    | CYB5R3       | GZMB      |
| NCKAP1  | APC          | FCRLA     |
| NDFIP1  | CST3         | KMO       |
| NDRG2   | WIF1         | IGLL3P    |
| NDUFA12 | ITM2C        | LGALS9    |
| NDUFA6  | EPHX1        | TBC1D10C  |
| NDUFB2  | COX7C        | FCN1      |
| NDUFB8  | MALAT1       | PMAIP1    |
| NDUFB9  | MOG          | PTPRCAP   |
| NDUFS2  | HLA-A        | LY86      |
| NDUFS3  | HLA-DPA1     | KIAA0226L |
| NDUFV1  | DDR1         | AGTR1     |
| NDUFV2  | POLR2L       | CORO1A    |
| NEDD8   | SQSTM1       | GPR160    |
| NEFH    | SNCB         | LYN       |
| NEFL    | MAG          | MX2       |
| NEFM    | COPG2IT1     | RERG      |
| NELL2   | TSPAN3       | UCP2      |
| NFKBIA  | UBQLN4       | DHRS9     |
| NGFRAP1 | MZT2A        | GPSM3     |
| NKAIN2  | LOC100190986 | IFI30     |
| NKRF    | UGT8         | CNTN4     |
| NLK     | C20orf202    | HMOX1     |
| NME7    | LOC100289333 | FXYD1     |
| NNAT    | PUM2         | RASSF2    |
| NPM1    | PTTG1IP      | LCP1      |
| NPTN    | TMEM14C      | ANGPTL7   |
| NR2E1   | GPRASP1      | PYGM      |
| NR2F2   | ATP5E        | CFL2      |
| NRGN    | GPR37        | FCGR2B    |
| NRXN1   | NDUFAB1      | GZMK      |
| NUAK1   | CTSH         | HAS1      |



|         |          |           |
|---------|----------|-----------|
| NUCKS1  | FAM213A  | CPNE5     |
| OCIAD2  | DDX59    | CDO1      |
| OLFM1   | FUT9     | AQP9      |
| OLFM3   | LGI1     | POU2AF1   |
| OPCML   | TM2D3    | FNDC1     |
| OXR1    | E2F4     | ZBED8     |
| P4HTM   | AGAP1    | LINC00936 |
| PABPC1  | CMTM5    | NCF1C     |
| PABPN1  | SPTAN1   | MYO1F     |
| PACSIN1 | HLA-DRB1 | TLR1      |
| PAIP2   | EDIL3    | CSK       |
| PAM     | DDAH1    | LINC01094 |
| PCDH10  | KIF3C    | NPNT      |
| PCDH7   | TEF      | HLA-DQB1  |
| PCDH8   | SRI      | SGCA      |
| PCDH9   | TPD52L1  | SLC16A6   |
| PCLO    | MGST1    | CHST2     |
| PCMT1   | HMGN1    | GADD45G   |
| PCSK1   | RHOA     | LRCH2     |
| PCSK1N  | TSPYL1   | HS3ST2    |
| PDCD10  | C18orf32 | PRKX      |
| PEA15   | LAMP1    | CR2       |
| PFDN2   | Septin 2 | PPL       |
| PFN2    | INPP1    | BIRC3     |
| PGAM1   | CIRBP    | RASSF5    |
| PGP     | NAPB     | ITGA4     |
| PHACTR1 | LMO3     | SOD3      |
| PHYHIPL | BANF1    | ACTC1     |
| PIAS1   | ADIPOR2  | IGLC1     |
| PJA2    | PRKACA   | AKR1C3    |
| PLCB1   | DNAJB1   | SLC37A2   |
| PLCB4   | HLA-DRB6 | HOXA4     |

|         |          |           |
|---------|----------|-----------|
| PLK2    | HLA-F    | SIGLEC10  |
| PLTP    | F3       | C5AR1     |
| PPA1    | SEPP1    | NEXN      |
| PPAP2B  | NEK7     | IGLV4-60  |
| PPIA    | KIF1A    | IBSP      |
| PPM1B   | WBP2     | CD24      |
| PPP2CA  | MSMO1    | CTSS      |
| PPP2R2B | BAG3     | NFKBIZ    |
| PPP3CB  | COCH     | LILRB1    |
| PPP6C   | ATP6V1E1 | SPAG4     |
| PRKCB   | RIMS3    | HSPB2     |
| PRKCDBP | MLF2     | CECR1     |
| PRKCI   | TSPYL4   | PIM2      |
| PRNP    | ENOPH1   | RUNX3     |
| PRPF8   | FUT8-AS1 | MYL9      |
| PRR12   | PRRT2    | LINC01215 |
| PSMA1   | CBX6     | VAV1      |
| PSMA2   | DPP6     | PRR16     |
| PSMA6   | PGRMC1   | AGT       |
| PSMB3   | COX7A2L  | CCL5      |
| PSMB4   | DMXL2    | MIR143HG  |
| PSMB7   | RANBP1   | PDE8B     |
| PSMC4   | MAPRE3   | TNFRSF21  |
| PSMD1   | DCTN1    | KLRB1     |
| PSMD11  | DKK3     | SALL2     |
| PSMD12  | CCDC115  | KCNN4     |
| PSMD14  | CYCS     | PCDHB10   |
| PSMD2   | SNPH     | SCO2      |
| PSME2   | ATL1     | SUCNR1    |
| PTGES3  | RASEF    | KIAA0895  |
| PTPRD   | SAP18    | SYNC      |
| PUM1    | SLC25A22 | CSF1R     |

|         |            |              |
|---------|------------|--------------|
| PURA    | SLC6A17    | FRY          |
| PURB    | HIPK2      | CD72         |
| RAB10   | RABAC1     | ITGB2-AS1    |
| RAB14   | ENHO       | ZC3H12A      |
| RAB24   | CX3CR1     | IL4I1        |
| RAB2A   | MAN1B1-AS1 | NLGN1        |
| RAB6A   | MTCH1      | LOC100505774 |
| RAD21   | PIP4K2A    | AGPAT9       |
| RALYL   | C3         | OMD          |
| RAN     | TRIM44     | DUSP2        |
| RANBP9  | EIF2A      | NCF4         |
| RAP1B   | ARHGEF3    | RGS18        |
| RAPGEF2 | NDUFS7     | PRIMA1       |
| RBBP7   | RGCC       | SNORA28      |
| RBFOX1  | ADCY1      | WFDC1        |
| RBFOX3  | GRINA      | CD3E         |
| RBX1    | CALM1      | HCK          |
| RFX3    | IGSF8      | OSCAR        |
| RGS4    | JUND       | ARHGAP9      |
| RHOB    | ZNF721     | S100A10      |
| RIMS1   | BNIP3      | NOX4         |
| RIMS2   | SLC20A1    | FHL1         |
| RNASEK  | HIST1H4C   | CCRL2        |
| RNF103  | NET1       | CYTIP        |
| RNF111  | CDIPT      | RASAL3       |
| RNF113A | CAMKK2     | TYROBP       |
| RNF146  | CAP2       | SLC31A2      |
| RNF220  | KCNJ4      | OSBPL3       |
| RORA    | NDUFC2     | PAG1         |
| RPL0    | FGF1       | CXCR4        |
| RPL17   | ATP1A1     | PNOC         |
| RPL19   | EEF2       | KDM6B        |

|         |        |           |
|---------|--------|-----------|
| RPL26L1 | HSPA1A | DUSP10    |
| RPL28   | HSPB1  | TBXAS1    |
| RPL3    | PRDX1  | RAB9B     |
| RPL30   | RPL22  | PXMP2     |
| RPL32   | RPL31  | LEFTY2    |
| RPL36A  | RPLP2  | ITGAL     |
| RPL36AL | VIM    | LMNB1     |
| RPL37A  | ARF3   | FAM65B    |
| RPS10   | DDX17  | NFE2L3    |
| RPS18   | PKM    | CXCL16    |
| RPS19   | RPL26  | TMEM237   |
| RPS21   | SCD    | CEBPA     |
| RPS23   | ACTB   | SBSPON    |
| RPS24   | ATP5B  | CYP4X1    |
| RPS25   | CFL1   | ANXA3     |
| RPS29   | EEF1A1 | ADRA2C    |
| RPS3A   | GAPDH  | CD1C      |
| RPS4Y1  | H3F3B  | SCARA3    |
| RPS7    | LDHB   | RGS19     |
| RRAGA   | NACA   | GP1BA     |
| RTN1    | RPL23A | SDC1      |
| RTN4    | RPL24  | SLC7A7    |
| RUNDC3A | RPS12  | HSPB7     |
| RYR2    | RPS6   | MYH11     |
| SATB2   | RPS8   | PDLIM3    |
| SCAF8   | TUBA1C | ZNRF3     |
| SCG2    | TUBB   | SLC16A10  |
| SCN2A   | TUBB4B | AIM2      |
| SEC14L1 | YWHAQ  | ANKRD35   |
| SEC61B  | YWHAZ  | MAPK13    |
| SELM    | EEF1G  | LINC00597 |
| SEMA5B  | RPL5   | NR4A2     |

|          |         |           |
|----------|---------|-----------|
| Septin 3 | RPL9    | CCL20     |
| SERPINI1 | RPS16   | Mar-01    |
| SGK1     | SLC25A6 | CSRP2     |
| SGMS1    | RPL10A  | MFAP4     |
| SHANK3   | RPL14   | LY9       |
| SLAIN1   | DNAJA1  | FGR       |
| SLC12A5  | HSPA8   | LTB       |
| SLC17A7  | RPL11   | KLHL13    |
| SLC24A3  | RPL13   | WTIP      |
| SLC25A12 | RPL34   | NAP1L3    |
| SLC25A3  | RPL4    | FYB       |
| SLC25A5  | RPL6    | SHISA4    |
| SLC35G2  | RPL7A   | VAMP8     |
| SLC38A2  | RPL8    | PTPRD-AS1 |
| SLC4A4   | RPS14   | CES1      |
| SLC6A1   | RPS3    | DUSP27    |
| SLTM     | RPS4X   | RERGL     |
| SNAP25   | RPS9    | TMEM255A  |
| SNAP91   | MYL6    | CDCA7L    |
| SNRNP27  | RPL13A  | NTRK3     |
| SNRPA    | RPL21   | NPY1R     |
| SOD1     | RPL23   | TMEM47    |
| SON      | RPL7    | PPIF      |
| SOX4     | RPS11   | SLAMF7    |
| SPATA24  |         | CP        |
| SPIN1    |         | CD1D      |
| SPTBN1   |         | ARRB2     |
| SRSF5    |         | WISP2     |
| SST      |         | HOGA1     |
| STAC2    |         | HLA-DMB   |
| STK39    |         | EPST11    |
| STMN2    |         | SLC15A3   |

|          |  |          |
|----------|--|----------|
| STXBP1   |  | CDH3     |
| SUMO1    |  | COTL1    |
| SUMO2    |  | CHIT1    |
| SV2A     |  | TEAD3    |
| SYBU     |  | GPX3     |
| SYNDIG1  |  | FBLIM1   |
| SYT1     |  | MLIP     |
| TAGLN3   |  | FCRL1    |
| TBCB     |  | FCGR1B   |
| TBPL1    |  | GPR171   |
| TCF4     |  | IL6      |
| TENM1    |  | CD8A     |
| THRB     |  | APOBEC3A |
| TJP1     |  | MYOZ2    |
| TMEM147  |  | CPED1    |
| TMEM170B |  | IGKC     |
| TMSB10   |  | TNFSF11  |
| TPT1     |  | C3AR1    |
| TSG101   |  | TMEM71   |
| TTC3     |  | SLPI     |
| TTC7B    |  | PCOLCE2  |
| TTYH1    |  | RAB7B    |
| TUBA1A   |  | LGMN     |
| TUBA1B   |  | RGS5     |
| TUBA4A   |  | CRIP2    |
| TUBB3    |  | MRVI1    |
| TXNL1    |  | LAMA2    |
| UBA1     |  | TLR7     |
| UBA2     |  | TMEM61   |
| UBB      |  | MRGPRF   |
| UBE2E2   |  | GPR84    |
| UBE4A    |  | BAMBI    |

|         |  |           |
|---------|--|-----------|
| UBL5    |  | GK        |
| UBQLN2  |  | RRAS      |
| UBR3    |  | LSP1      |
| UQCRC1  |  | HS3ST3A1  |
| USMG5   |  | SEMA4D    |
| UXT     |  | MAP4K1    |
| VAMP2   |  | RGN       |
| VAPA    |  | CRLF1     |
| VDAC3   |  | TMEM100   |
| VSNL1   |  | C12orf75  |
| WAC     |  | RBP7      |
| WASF1   |  | CYTL1     |
| WASL    |  | MYOM1     |
| YPEL3   |  | MICU3     |
| YTHDF3  |  | AOX1      |
| YWHAE   |  | CHODL     |
| YWHAG   |  | PDGFD     |
| YWHAH   |  | ITPR1-AS1 |
| ZBTB16  |  | NFKBIE    |
| ZBTB18  |  | CDH13     |
| ZCRB1   |  | GMFG      |
| ZDBF2   |  | TMEM52B   |
| ZEB2    |  | C8orf88   |
| ZFAND5  |  | NLRC5     |
| ZFPM2   |  | ADAP2     |
| ZNF281  |  | SH2B3     |
| ZNF385A |  | ADRBK2    |
| ZNF423  |  | HK3       |
| ZRANB2  |  | C9orf91   |
| ZSWIM6  |  | ARHGEF17  |
|         |  | PARM1     |
|         |  | SIGLEC15  |

|  |  |        |
|--|--|--------|
|  |  | HVCN1  |
|  |  | CLEC4A |
|  |  | GALNT6 |
|  |  | TAGLN  |
|  |  | CTSG   |
|  |  | PARP12 |
|  |  | STX11  |
|  |  | LTBP1  |
|  |  | FAM83D |
|  |  | MYEF2  |
|  |  | MAN2B1 |
|  |  | SGK1   |
|  |  | PFN2   |
|  |  | LGR6   |
|  |  | NELL2  |
|  |  | SELM   |
|  |  | IGFBP2 |
|  |  | BCL11A |
|  |  | MYL6   |
|  |  | RPL13A |
|  |  | RPL21  |
|  |  | RPL23  |
|  |  | RPL7   |
|  |  | RPS11  |
|  |  | DNAJA1 |
|  |  | HSPA8  |
|  |  | RPL11  |
|  |  | RPL13  |
|  |  | RPL34  |
|  |  | RPL4   |
|  |  | RPL6   |
|  |  | RPL7A  |



|  |  |          |
|--|--|----------|
|  |  | RPL8     |
|  |  | RPS14    |
|  |  | RPS3     |
|  |  | RPS4X    |
|  |  | RPS9     |
|  |  | RPL10A   |
|  |  | RPL14    |
|  |  | PHGDH    |
|  |  | CHI3L1   |
|  |  | SPP1     |
|  |  | HILPDA   |
|  |  | RCAN2    |
|  |  | CA2      |
|  |  | LAPTM5   |
|  |  | ATP1A2   |
|  |  | PPP1R14A |
|  |  | PLAC8    |
|  |  | MIR100HG |
|  |  | CRYAB    |
|  |  | ZBTB16   |
|  |  | ACTB     |
|  |  | ATP5B    |
|  |  | CFL1     |
|  |  | EEF1A1   |
|  |  | GAPDH    |
|  |  | H3F3B    |
|  |  | LDHB     |
|  |  | NACA     |
|  |  | RPL23A   |
|  |  | RPL24    |
|  |  | RPS12    |
|  |  | RPS6     |

|  |  |         |
|--|--|---------|
|  |  | RPS8    |
|  |  | TUBA1C  |
|  |  | TUBB    |
|  |  | TUBB4B  |
|  |  | YWHAQ   |
|  |  | YWHAZ   |
|  |  | EEF1G   |
|  |  | RPL5    |
|  |  | RPL9    |
|  |  | RPS16   |
|  |  | SLC25A6 |
|  |  | ATP1A1  |
|  |  | EEF2    |
|  |  | HSPA1A  |
|  |  | HSPB1   |
|  |  | PRDX1   |
|  |  | RPL22   |
|  |  | RPL31   |
|  |  | RPLP2   |
|  |  | VIM     |
|  |  | ARF3    |
|  |  | DDX17   |
|  |  | PKM     |
|  |  | RPL26   |
|  |  | SCD     |
