# Supplementary material for: The RXFP3 receptor is functionally associated with cellular responses to oxidative stress and DNA damage
Source: publisher site journal article supplement (doi:10.18632/aging.102528), 2019-12-03
Supplement: Supplementary file [file aging-v11i23-102528-supplementary-material-SD25.pdf]

**Table S24. RXFP3 constellation TOP 15 and contra-regulated proteins.** TOP15 up (red) and down (green) regulated proteins, after 0.5µg and 5µg of RXFP3 overexpression. In addition, we have noted the contra-regulated proteins, which were upregulated in on cellular fraction, while being downregulated in another. Molecular function and Biological processes were identified using Uniprot ([www.uniprot.org](http://www.uniprot.org)).

**0.5µg RXFP3 TOP15 proteins (up vs down)**

| Gene Name | Protein name                                       | Fraction        | Biological process                                        | Molecular function                                      | Ratio        |
|-----------|----------------------------------------------------|-----------------|-----------------------------------------------------------|---------------------------------------------------------|--------------|
| PFKP      | ATP-dependent 6-phosphofructokinase, platelet type | Nucleus         | Glycolysis                                                | ATP binding                                             | -0.933801233 |
| UBE2A     | Ubiquitin-conjugating enzyme E2 A                  | Cytoplasm       | DNA repair                                                | ubiquitin binding                                       | -0.839495701 |
| PAGR1     | PAXIP1-associated glutamate-rich protein 1         | Nucleus         | DNA repair                                                | estrogen receptor binding                               | -0.699972463 |
| ABHD14B   | Protein ABHD14B                                    | Plasma membrane | positive regulation of transcription by RNA polymerase II | Hydrolase activity                                      | -0.668326834 |
| MTMR1     | Myotubularin-related protein 1                     | Nucleus         | phosphatidylinositol biosynthetic process                 | phosphatidylinositol-3-phosphatase activity             | -0.621246409 |
| MMS22L    | Protein MMS22-like                                 | Plasma membrane | DNA repair                                                | double-strand break repair via homologous recombination | -0.613099215 |
| FTSJ3     | pre-rRNA processing protein FTSJ3                  | Cytoplasm       | rRNA methylation                                          | RNA binding                                             | -0.597216129 |
| TCOF1     | Treacle protein                                    | Nucleus         | neural crest cell development                             | scaffold protein binding                                | -0.582391813 |
| CDCA2     | Cell division cycle-associated protein 2           | Nucleus         | Cell Cycle                                                | recruitment of PPP1CC                                   | -0.572116462 |
| PEX16     | Peroxisomal membrane protein PEX16                 | Nucleus         | ER-dependent peroxisome organization                      | protein C-terminus binding                              | -0.542415816 |
| C17orf85  | Nuclear cap-binding protein subunit 3              | Plasma membrane | defense response to virus                                 | mRNA binding                                            | -0.509221907 |
| RAB35     | Ras-related protein Rab-35                         | Cytoplasm       | intracellular protein transport                           | GTPase activity                                         | -0.483292704 |
| POP1      | Ribonucleases P/MRP protein subunit POP1           | Nucleus         | tRNA processing                                           | RNA binding                                             | -0.480293841 |

|           |                                                                |                 |                                                              |                                             |              |
|-----------|----------------------------------------------------------------|-----------------|--------------------------------------------------------------|---------------------------------------------|--------------|
| INIP      | SOSS complex subunit C                                         | Plasma membrane | DNA repair                                                   | cell-cycle checkpoint activation            | -0.464897285 |
| G3BP2     | Ras GTPase-activating protein-binding protein 2                | Nucleus         | stress granule assembly                                      | RNA binding                                 | -0.443212682 |
| HIST1H1D  | Histone H1.3                                                   | Cytoplasm       | regulation of transcription, DNA-templated                   | double-stranded DNA binding                 | 1.69537665   |
| HIST1H3A  | Histone H3.1                                                   | Cytoplasm       | telomere organization                                        | nucleosomal DNA binding                     | 1.29687801   |
| HIST1H2BA | Histone H2B type 1-A                                           | Nucleus         | spermatogenesis, exchange of chromosomal proteins            | DNA binding                                 | 0.98502167   |
| NPC1      | NPC intracellular cholesterol transporter 1                    | Nucleus         | endocytosis                                                  | cholesterol binding                         | 0.82207564   |
| PDE7B     | cAMP-specific 3',5'-cyclic phosphodiesterase 7B                | Nucleus         | G protein-coupled receptor signaling pathway                 | 3',5'-cyclic-AMP phosphodiesterase activity | 0.73215318   |
| POTEKP    | Putative beta-actin-like protein 3                             | Nucleus         | platelet degranulation                                       | ATP binding                                 | 0.72216339   |
| NRDE2     | Protein Nuclear RNAi defective-2 protein homolog               | Cytoplasm       | chromatin silencing by small RNA                             | meiotic cell cycle                          | 0.71048568   |
| SDHC      | Succinate dehydrogenase cytochrome b560 subunit, mitochondrial | Nucleus         | response to oxidative stress                                 | succinate dehydrogenase activity            | 0.69611017   |
| ALG9      | Alpha-1,2-mannosyltransferase ALG9                             | Nucleus         | dolichol-linked oligosaccharide biosynthetic process         | mannosyltransferase activity                | 0.67601612   |
| MEPCE     | 7SK snRNA methylphosphate capping enzyme                       | Nucleus         | positive regulation of G1/S transition of mitotic cell cycle | RNA methyltransferase activity              | 0.66262566   |
| HIST1H1B  | Histone H1.5                                                   | Nucleus         | negative regulation of DNA recombination                     | double-stranded DNA binding                 | 0.65287147   |
| RAB18     | Ras-related protein Rab-18                                     | Nucleus         | brain development                                            | GTPase activity                             | 0.59045816   |
| HIST1H1E  | Histone H1.4                                                   | Plasma membrane | negative regulation of DNA recombination                     | double-stranded DNA binding                 | 0.52578466   |

|        |                                                              |           |                                   |                                 |            |
|--------|--------------------------------------------------------------|-----------|-----------------------------------|---------------------------------|------------|
| ZNF770 | Zinc finger protein 770                                      | Nucleus   | Transcription regulation          | DNA binding                     | 0.49731068 |
| HGS    | Hepatocyte growth factor-regulated tyrosine kinase substrate | Cytoplasm | regulation of MAP kinase activity | protein domain specific binding | 0.49643679 |

### 5µg RXFP3 TOP15 (Up vs Down)

| Gene Name | Protein name                                       | Fraction        | Biological process                        | Molecular function                                      | Ratio      |
|-----------|----------------------------------------------------|-----------------|-------------------------------------------|---------------------------------------------------------|------------|
| PFKP      | ATP-dependent 6-phosphofructokinase, platelet type | Nucleus         | Glycolysis                                | ATP binding                                             | -1.2301783 |
| MMS22L    | Protein MMS22-like                                 | Plasma membrane | DNA repair                                | double-strand break repair via homologous recombination | -0.9509465 |
| UBE2A     | Ubiquitin-conjugating enzyme E2 A                  | Cytoplasm       | DNA repair                                | ubiquitin binding                                       | -0.8921860 |
| MTMR1     | Myotubularin-related protein 1                     | Nucleus         | phosphatidylinositol biosynthetic process | phosphatidylinositol-3-phosphatase activity             | -0.7301783 |
| PRR14L    | proline rich 14 like                               | Cytoplasm       | age-related hearing impairment            |                                                         | -0.6456494 |
| PAGR1     | PAXIP1-associated glutamate-rich protein 1         | Nucleus         | DNA repair                                | estrogen receptor binding                               | -0.6339558 |
| CDC73     | Cell division control protein 73 - Parafibromin    | Cytoplasm       | Cell Cycle                                | RNA polymerase II complex binding                       | -0.6293653 |
| PEX16     | Peroxisomal membrane protein PEX16                 | Nucleus         | ER-dependent peroxisome organization      | protein C-terminus binding                              | -0.6256179 |
| FTSJ3     | pre-rRNA processing protein FTSJ3                  | Cytoplasm       | rRNA methylation                          | RNA binding                                             | -0.6115637 |
| C17orf85  | Nuclear cap-binding protein subunit 3              | Plasma membrane | defense response to virus                 | mRNA binding                                            | -0.5433843 |
| ATXN2     | Ataxin-2                                           | Nucleus         | stress granule assembly                   | RNA binding                                             | -0.5270031 |
| ENAH      | Protein enabled homolog                            | Nucleus         | axon guidance                             | actin binding                                           | -0.5236093 |
| EPN2      | Epsin-2                                            | Nucleus         | endocytosis                               | lipid binding                                           | -0.5171690 |
| NEDD4     | E3 ubiquitin-protein ligase NEDD4                  | Cytoplasm       | negative regulation of transcription      | proline-rich region binding                             | -0.5099110 |

|          |                                                 |                 |                                                                      |                                                                                                         |            |
|----------|-------------------------------------------------|-----------------|----------------------------------------------------------------------|---------------------------------------------------------------------------------------------------------|------------|
|          |                                                 |                 | from RNA polymerase II promoter in response to UV-induced DNA damage |                                                                                                         |            |
| UBQLN2   | Ubiquilin-2                                     | Cytoplasm       | negative regulation of G protein-coupled receptor internalization    | specifically reducing the rate at which receptor-arrestin complexes concentrate in clathrin-coated pits | -0.4868222 |
| RXFP3    | Relaxin-3 receptor 1                            | Cytoplasm       | neuropeptide signaling pathway                                       | G protein-coupled receptor activity                                                                     | 1.20897964 |
| VTN      | Vitronectin                                     | Nucleus         | cell migration                                                       | extracellular matrix binding                                                                            | 0.80193072 |
| CA3      | Carbonic anhydrase 3                            | Nucleus         | response to oxidative stress                                         | zinc ion binding                                                                                        | 0.75535047 |
| HIST1H1E | Histone H1.4                                    | Plasma membrane | negative regulation of DNA recombination                             | double-stranded DNA binding                                                                             | 0.73601747 |
| HIST1H1D | Histone H1.3                                    | Cytoplasm       | regulation of transcription, DNA-templated                           | double-stranded DNA binding                                                                             | 0.66586118 |
| FKBP7    | Peptidyl-prolyl cis-trans isomerase FKBP7       | Nucleus         | PPIase activity                                                      | calcium ion binding                                                                                     | 0.61510583 |
| KRT9     | Keratin, type I cytoskeletal 9                  | Plasma membrane | spermatogenesis                                                      | structural constituent of cytoskeleton                                                                  | 0.59520963 |
| HBB      | Hemoglobin subunit beta                         | Nucleus         | cellular oxidant detoxification                                      | oxygen binding                                                                                          | 0.58925226 |
| LSM1     | U6 snRNA-associated Sm-like protein LSM1        | Plasma membrane | RNA metabolic process                                                | RNA binding                                                                                             | 0.55966673 |
| AHCYL1   | S-adenosylhomocysteine hydrolase-like protein 1 | Nucleus         | protein export from nucleus                                          | RNA binding                                                                                             | 0.55891345 |
| DDX19A   | ATP-dependent RNA helicase DDX19A               | Nucleus         | protein transport                                                    | ATP binding                                                                                             | 0.54846789 |
| HIST1H1B | Histone H1.5                                    | Plasma membrane | negative regulation of DNA recombination                             | double-stranded DNA binding                                                                             | 0.52915313 |
| UQCR10   | Cytochrome b-c1 complex subunit 9               | Nucleus         | aerobic respiration                                                  | ubiquinol-cytochrome-c reductase activity                                                               | 0.52880323 |

|       |                                   |                 |                                     |                        |            |
|-------|-----------------------------------|-----------------|-------------------------------------|------------------------|------------|
| TPM3  | Tropomyosin alpha-3 chain         | Plasma membrane | actin filament organization         | actin filament binding | 0.49354763 |
| BANF1 | Barrier-to-autointegration factor | Cytoplasm       | mitotic nuclear envelope reassembly | DNA binding            | 0.48193131 |

#### 0.5µg RXFP3 contra-regulated proteins

| Gene Name | Protein name                               | Fraction        | Biological process                                | Molecular function | Ratio       |
|-----------|--------------------------------------------|-----------------|---------------------------------------------------|--------------------|-------------|
| GIG1      | Tripeptidyl-peptidase 1                    | Cytoplasm       | lysosome organization, nervous system development | peptidase activity | 0.43317840  |
|           |                                            | Plasma membrane |                                                   |                    | -0.44428175 |
| NOLC      | Nucleolar and coiled-body phosphoprotein 1 | Cytoplasm       | mitotic cell cycle                                | DNA binding        | 0.29176850  |
|           |                                            | Nucleus         |                                                   |                    | -0.25257723 |
| RRBP1     | Ribosome-binding protein 1                 | Cytoplasm       | protein transport, osteoblast differentiation     | RNA binding        | 0.40523133  |
|           |                                            | Nucleus         |                                                   |                    | -0.28990827 |

#### 5µg RXFP3 contra-regulated proteins

| Gene Name | Protein name                       | Fraction        | Biological process                           | Molecular function                        | Ratio       |
|-----------|------------------------------------|-----------------|----------------------------------------------|-------------------------------------------|-------------|
| GPALPP1   | GPALPP motifs-containing protein 1 | Cytoplasm       | Lipopolysaccharide-specific response protein | /                                         | 0.18859051  |
|           |                                    | Nucleus         |                                              |                                           | -0.43296688 |
| TXN2      | Thioredoxin, mitochondrial         | Plasma membrane | response to oxidative stress                 | protein disulfide oxidoreductase activity | 0.74652276  |
|           |                                    | Nucleus         |                                              |                                           | -0.51500787 |
| UNC45A    | Protein unc-45 homolog A           | Nucleus         | cell differentiation                         | cadherin binding                          | 0.41764516  |
|           |                                    | Cytoplasm       |                                              |                                           | -0.25480718 |
